# Supplementary material
Source: publisher site journal article supplement (https://www.dovepress.com/article/supplementary_file/559901/559901%20Revised%20Supplementary%20Tables%201-6.xlsx)
Supplement: Supplementary file 1 [file 559901%20Revised%20Supplementary%20Tables%201-6.xlsx]

## Sheet: Supplementary Table 1
Supplementary Table 1: Two-sample Mendelian randomization results of immnue cells on the risk of preeclampsia
id.exposure	id.outcome	outcome	exposure	method	nsnp	b	se	pval	lo_ci	up_ci	or	or_lci95	or_uci95
ebi-a-GCST90001391	gen_samplesize_1finngen_R9_O15_PRE_OR_ECLAMPSIA	outcome	|| id:ebi-a-GCST90001391	Inverse variance weighted	12	0.0181903	0.0290263	0.530867	-0.0387012	0.0750818	1.01836	0.962038	1.07797
ebi-a-GCST90001391	gen_samplesize_1finngen_R9_O15_PRE_OR_ECLAMPSIA	outcome	|| id:ebi-a-GCST90001391	MR Egger	12	0.0390951	0.0431175	0.385887	-0.0454152	0.123605	1.03987	0.955601	1.13157
ebi-a-GCST90001391	gen_samplesize_1finngen_R9_O15_PRE_OR_ECLAMPSIA	outcome	|| id:ebi-a-GCST90001391	Weighted median	12	0.0235907	0.0379871	0.534587	-0.050864	0.0980455	1.02387	0.950408	1.10301
ebi-a-GCST90001391	gen_samplesize_1finngen_R9_O15_PRE_OR_ECLAMPSIA	outcome	|| id:ebi-a-GCST90001391	Weighted mode	12	0.00221677	0.0435973	0.960359	-0.083234	0.0876675	1.00222	0.920136	1.09163
ebi-a-GCST90001392	gen_samplesize_1finngen_R9_O15_PRE_OR_ECLAMPSIA	outcome	|| id:ebi-a-GCST90001392	Inverse variance weighted	18	0.0353678	0.0239722	0.140114	-0.0116177	0.0823533	1.036	0.98845	1.08584
ebi-a-GCST90001392	gen_samplesize_1finngen_R9_O15_PRE_OR_ECLAMPSIA	outcome	|| id:ebi-a-GCST90001392	MR Egger	18	0.0493519	0.0308251	0.128927	-0.0110652	0.109769	1.05059	0.988996	1.11602
ebi-a-GCST90001392	gen_samplesize_1finngen_R9_O15_PRE_OR_ECLAMPSIA	outcome	|| id:ebi-a-GCST90001392	Weighted median	18	0.0290012	0.0291453	0.319709	-0.0281235	0.0861259	1.02943	0.972268	1.08994
ebi-a-GCST90001392	gen_samplesize_1finngen_R9_O15_PRE_OR_ECLAMPSIA	outcome	|| id:ebi-a-GCST90001392	Weighted mode	18	0.0347584	0.0242691	0.170215	-0.012809	0.0823258	1.03537	0.987273	1.08581
ebi-a-GCST90001393	gen_samplesize_1finngen_R9_O15_PRE_OR_ECLAMPSIA	outcome	|| id:ebi-a-GCST90001393	Inverse variance weighted	7	-0.00872842	0.0342002	0.798557	-0.0757608	0.0583039	0.99131	0.927038	1.06004
ebi-a-GCST90001393	gen_samplesize_1finngen_R9_O15_PRE_OR_ECLAMPSIA	outcome	|| id:ebi-a-GCST90001393	MR Egger	7	0.0205911	0.0444045	0.662338	-0.0664418	0.107624	1.0208	0.935717	1.11363
ebi-a-GCST90001393	gen_samplesize_1finngen_R9_O15_PRE_OR_ECLAMPSIA	outcome	|| id:ebi-a-GCST90001393	Weighted median	7	0.00132102	0.0418445	0.974815	-0.0806941	0.0833361	1.00132	0.922476	1.08691
ebi-a-GCST90001393	gen_samplesize_1finngen_R9_O15_PRE_OR_ECLAMPSIA	outcome	|| id:ebi-a-GCST90001393	Weighted mode	7	0.00167539	0.0390884	0.967203	-0.0749379	0.0782887	1.00168	0.927801	1.08143
ebi-a-GCST90001394	gen_samplesize_1finngen_R9_O15_PRE_OR_ECLAMPSIA	outcome	|| id:ebi-a-GCST90001394	Inverse variance weighted	16	0.0154244	0.0124026	0.213633	-0.00888478	0.0397335	1.01554	0.991155	1.04053
ebi-a-GCST90001394	gen_samplesize_1finngen_R9_O15_PRE_OR_ECLAMPSIA	outcome	|| id:ebi-a-GCST90001394	MR Egger	16	0.0245228	0.0141883	0.105901	-0.00328636	0.0523319	1.02483	0.996719	1.05373
ebi-a-GCST90001394	gen_samplesize_1finngen_R9_O15_PRE_OR_ECLAMPSIA	outcome	|| id:ebi-a-GCST90001394	Weighted median	16	0.0156953	0.0147655	0.287797	-0.0132452	0.0446358	1.01582	0.986842	1.04565
ebi-a-GCST90001394	gen_samplesize_1finngen_R9_O15_PRE_OR_ECLAMPSIA	outcome	|| id:ebi-a-GCST90001394	Weighted mode	16	0.016722	0.013688	0.240691	-0.0101064	0.0435504	1.01686	0.989944	1.04451
ebi-a-GCST90001395	gen_samplesize_1finngen_R9_O15_PRE_OR_ECLAMPSIA	outcome	|| id:ebi-a-GCST90001395	Inverse variance weighted	10	0.020262	0.0622769	0.744914	-0.101801	0.142325	1.02047	0.90321	1.15295
ebi-a-GCST90001395	gen_samplesize_1finngen_R9_O15_PRE_OR_ECLAMPSIA	outcome	|| id:ebi-a-GCST90001395	MR Egger	10	-0.00499355	0.165297	0.97664	-0.328975	0.318988	0.995019	0.719661	1.37573
ebi-a-GCST90001395	gen_samplesize_1finngen_R9_O15_PRE_OR_ECLAMPSIA	outcome	|| id:ebi-a-GCST90001395	Weighted median	10	0.00588397	0.0787994	0.940477	-0.148563	0.160331	1.0059	0.861946	1.1739
ebi-a-GCST90001395	gen_samplesize_1finngen_R9_O15_PRE_OR_ECLAMPSIA	outcome	|| id:ebi-a-GCST90001395	Weighted mode	10	0.0390414	0.114429	0.740794	-0.185239	0.263322	1.03981	0.830906	1.30125
ebi-a-GCST90001396	gen_samplesize_1finngen_R9_O15_PRE_OR_ECLAMPSIA	outcome	|| id:ebi-a-GCST90001396	Inverse variance weighted	8	-0.0824034	0.0452931	0.0688602	-0.171178	0.00637111	0.9209	0.842672	1.00639
ebi-a-GCST90001396	gen_samplesize_1finngen_R9_O15_PRE_OR_ECLAMPSIA	outcome	|| id:ebi-a-GCST90001396	MR Egger	8	0.0112849	0.103233	0.916517	-0.191051	0.213621	1.01135	0.82609	1.23815
ebi-a-GCST90001396	gen_samplesize_1finngen_R9_O15_PRE_OR_ECLAMPSIA	outcome	|| id:ebi-a-GCST90001396	Weighted median	8	-0.0569373	0.0611619	0.351891	-0.176815	0.06294	0.944653	0.837935	1.06496
ebi-a-GCST90001396	gen_samplesize_1finngen_R9_O15_PRE_OR_ECLAMPSIA	outcome	|| id:ebi-a-GCST90001396	Weighted mode	8	-0.07313	0.063853	0.289733	-0.198282	0.052022	0.92948	0.820139	1.0534
ebi-a-GCST90001397	gen_samplesize_1finngen_R9_O15_PRE_OR_ECLAMPSIA	outcome	|| id:ebi-a-GCST90001397	Inverse variance weighted	19	-0.017289	0.0174773	0.322552	-0.0515444	0.0169665	0.98286	0.949761	1.01711
ebi-a-GCST90001397	gen_samplesize_1finngen_R9_O15_PRE_OR_ECLAMPSIA	outcome	|| id:ebi-a-GCST90001397	MR Egger	19	0.0230268	0.0236381	0.343646	-0.0233039	0.0693576	1.02329	0.976966	1.07182
ebi-a-GCST90001397	gen_samplesize_1finngen_R9_O15_PRE_OR_ECLAMPSIA	outcome	|| id:ebi-a-GCST90001397	Weighted median	19	-0.0214489	0.0290113	0.459707	-0.0783111	0.0354133	0.978779	0.924677	1.03605
ebi-a-GCST90001397	gen_samplesize_1finngen_R9_O15_PRE_OR_ECLAMPSIA	outcome	|| id:ebi-a-GCST90001397	Weighted mode	19	-0.0262673	0.0276387	0.354506	-0.0804391	0.0279045	0.974075	0.922711	1.0283
ebi-a-GCST90001398	gen_samplesize_1finngen_R9_O15_PRE_OR_ECLAMPSIA	outcome	|| id:ebi-a-GCST90001398	Inverse variance weighted	11	-0.0529668	0.053417	0.321407	-0.157664	0.0517305	0.948412	0.854137	1.05309
ebi-a-GCST90001398	gen_samplesize_1finngen_R9_O15_PRE_OR_ECLAMPSIA	outcome	|| id:ebi-a-GCST90001398	MR Egger	11	0.016958	0.141515	0.907249	-0.260412	0.294328	1.0171	0.770734	1.34222
ebi-a-GCST90001398	gen_samplesize_1finngen_R9_O15_PRE_OR_ECLAMPSIA	outcome	|| id:ebi-a-GCST90001398	Weighted median	11	-0.0490481	0.068189	0.471958	-0.182699	0.0846023	0.952135	0.833019	1.08828
ebi-a-GCST90001398	gen_samplesize_1finngen_R9_O15_PRE_OR_ECLAMPSIA	outcome	|| id:ebi-a-GCST90001398	Weighted mode	11	-0.0530718	0.0747008	0.493655	-0.199485	0.0933417	0.948312	0.819152	1.09784
ebi-a-GCST90001399	gen_samplesize_1finngen_R9_O15_PRE_OR_ECLAMPSIA	outcome	|| id:ebi-a-GCST90001399	Inverse variance weighted	11	0.0655565	0.0365698	0.0730307	-0.00612036	0.137233	1.06775	0.993898	1.1471
ebi-a-GCST90001399	gen_samplesize_1finngen_R9_O15_PRE_OR_ECLAMPSIA	outcome	|| id:ebi-a-GCST90001399	MR Egger	11	0.048502	0.0823017	0.570142	-0.112809	0.209813	1.0497	0.893321	1.23345
ebi-a-GCST90001399	gen_samplesize_1finngen_R9_O15_PRE_OR_ECLAMPSIA	outcome	|| id:ebi-a-GCST90001399	Weighted median	11	0.0525416	0.0447209	0.240043	-0.0351113	0.140195	1.05395	0.965498	1.1505
ebi-a-GCST90001399	gen_samplesize_1finngen_R9_O15_PRE_OR_ECLAMPSIA	outcome	|| id:ebi-a-GCST90001399	Weighted mode	11	0.0483804	0.0481343	0.338543	-0.0459628	0.142724	1.04957	0.955078	1.15341
ebi-a-GCST90001400	gen_samplesize_1finngen_R9_O15_PRE_OR_ECLAMPSIA	outcome	|| id:ebi-a-GCST90001400	Inverse variance weighted	8	0.0170669	0.0138546	0.218001	-0.010088	0.0442218	1.01721	0.989963	1.04521
ebi-a-GCST90001400	gen_samplesize_1finngen_R9_O15_PRE_OR_ECLAMPSIA	outcome	|| id:ebi-a-GCST90001400	MR Egger	8	0.0137382	0.0162505	0.430304	-0.0181128	0.0455893	1.01383	0.98205	1.04664
ebi-a-GCST90001400	gen_samplesize_1finngen_R9_O15_PRE_OR_ECLAMPSIA	outcome	|| id:ebi-a-GCST90001400	Weighted median	8	0.0164274	0.0172253	0.340245	-0.0173342	0.050189	1.01656	0.982815	1.05147
ebi-a-GCST90001400	gen_samplesize_1finngen_R9_O15_PRE_OR_ECLAMPSIA	outcome	|| id:ebi-a-GCST90001400	Weighted mode	8	0.0152156	0.0150012	0.344212	-0.0141867	0.0446179	1.01533	0.985913	1.04563
ebi-a-GCST90001401	gen_samplesize_1finngen_R9_O15_PRE_OR_ECLAMPSIA	outcome	|| id:ebi-a-GCST90001401	Inverse variance weighted	13	0.0529582	0.0482258	0.272148	-0.0415644	0.147481	1.05439	0.959288	1.15891
ebi-a-GCST90001401	gen_samplesize_1finngen_R9_O15_PRE_OR_ECLAMPSIA	outcome	|| id:ebi-a-GCST90001401	MR Egger	13	0.0527584	0.134135	0.701598	-0.210147	0.315664	1.05417	0.810465	1.37117
ebi-a-GCST90001401	gen_samplesize_1finngen_R9_O15_PRE_OR_ECLAMPSIA	outcome	|| id:ebi-a-GCST90001401	Weighted median	13	0.0181315	0.055502	0.743908	-0.0906523	0.126915	1.0183	0.913335	1.13532
ebi-a-GCST90001401	gen_samplesize_1finngen_R9_O15_PRE_OR_ECLAMPSIA	outcome	|| id:ebi-a-GCST90001401	Weighted mode	13	-0.00506257	0.063315	0.937588	-0.12916	0.119035	0.99495	0.878833	1.12641
ebi-a-GCST90001402	gen_samplesize_1finngen_R9_O15_PRE_OR_ECLAMPSIA	outcome	|| id:ebi-a-GCST90001402	Inverse variance weighted	10	-0.0128129	0.0351417	0.715406	-0.0816906	0.0560649	0.987269	0.921557	1.05767
ebi-a-GCST90001402	gen_samplesize_1finngen_R9_O15_PRE_OR_ECLAMPSIA	outcome	|| id:ebi-a-GCST90001402	MR Egger	10	-0.0416156	0.0593929	0.503366	-0.158026	0.0747945	0.959238	0.853828	1.07766
ebi-a-GCST90001402	gen_samplesize_1finngen_R9_O15_PRE_OR_ECLAMPSIA	outcome	|| id:ebi-a-GCST90001402	Weighted median	10	-0.0357851	0.0471209	0.447595	-0.128142	0.0565719	0.964848	0.879728	1.0582
ebi-a-GCST90001402	gen_samplesize_1finngen_R9_O15_PRE_OR_ECLAMPSIA	outcome	|| id:ebi-a-GCST90001402	Weighted mode	10	-0.0501427	0.0537086	0.374876	-0.155412	0.0551262	0.951094	0.856063	1.05667
ebi-a-GCST90001403	gen_samplesize_1finngen_R9_O15_PRE_OR_ECLAMPSIA	outcome	|| id:ebi-a-GCST90001403	Inverse variance weighted	15	0.0292165	0.0277265	0.292003	-0.0251275	0.0835605	1.02965	0.975186	1.08715
ebi-a-GCST90001403	gen_samplesize_1finngen_R9_O15_PRE_OR_ECLAMPSIA	outcome	|| id:ebi-a-GCST90001403	MR Egger	15	0.0116328	0.0388274	0.769217	-0.0644688	0.0877344	1.0117	0.937565	1.0917
ebi-a-GCST90001403	gen_samplesize_1finngen_R9_O15_PRE_OR_ECLAMPSIA	outcome	|| id:ebi-a-GCST90001403	Weighted median	15	0.0282776	0.0396776	0.476041	-0.0494905	0.106046	1.02868	0.951714	1.11187
ebi-a-GCST90001403	gen_samplesize_1finngen_R9_O15_PRE_OR_ECLAMPSIA	outcome	|| id:ebi-a-GCST90001403	Weighted mode	15	0.0301717	0.0366453	0.424116	-0.0416531	0.101996	1.03063	0.959203	1.10738
ebi-a-GCST90001404	gen_samplesize_1finngen_R9_O15_PRE_OR_ECLAMPSIA	outcome	|| id:ebi-a-GCST90001404	Inverse variance weighted	19	-0.0147353	0.0183914	0.423011	-0.0507825	0.0213118	0.985373	0.950485	1.02154
ebi-a-GCST90001404	gen_samplesize_1finngen_R9_O15_PRE_OR_ECLAMPSIA	outcome	|| id:ebi-a-GCST90001404	MR Egger	19	-0.00233133	0.0234576	0.921995	-0.0483081	0.0436455	0.997671	0.95284	1.04461
ebi-a-GCST90001404	gen_samplesize_1finngen_R9_O15_PRE_OR_ECLAMPSIA	outcome	|| id:ebi-a-GCST90001404	Weighted median	19	-0.00465819	0.0223978	0.835248	-0.0485578	0.0392415	0.995353	0.952602	1.04002
ebi-a-GCST90001404	gen_samplesize_1finngen_R9_O15_PRE_OR_ECLAMPSIA	outcome	|| id:ebi-a-GCST90001404	Weighted mode	19	-0.00506204	0.0195531	0.79866	-0.0433861	0.0332621	0.994951	0.957542	1.03382
ebi-a-GCST90001405	gen_samplesize_1finngen_R9_O15_PRE_OR_ECLAMPSIA	outcome	|| id:ebi-a-GCST90001405	Inverse variance weighted	11	-0.00449108	0.0150365	0.765186	-0.0339627	0.0249805	0.995519	0.966608	1.0253
ebi-a-GCST90001405	gen_samplesize_1finngen_R9_O15_PRE_OR_ECLAMPSIA	outcome	|| id:ebi-a-GCST90001405	MR Egger	11	-0.0164291	0.017997	0.385107	-0.0517031	0.018845	0.983705	0.949611	1.01902
ebi-a-GCST90001405	gen_samplesize_1finngen_R9_O15_PRE_OR_ECLAMPSIA	outcome	|| id:ebi-a-GCST90001405	Weighted median	11	-0.00128564	0.0191534	0.946483	-0.0388262	0.0362549	0.998715	0.961918	1.03692
ebi-a-GCST90001405	gen_samplesize_1finngen_R9_O15_PRE_OR_ECLAMPSIA	outcome	|| id:ebi-a-GCST90001405	Weighted mode	11	-0.00881215	0.0167486	0.610259	-0.0416395	0.0240152	0.991227	0.959216	1.02431
ebi-a-GCST90001406	gen_samplesize_1finngen_R9_O15_PRE_OR_ECLAMPSIA	outcome	|| id:ebi-a-GCST90001406	Inverse variance weighted	20	-0.0178964	0.0209108	0.392084	-0.0588817	0.0230888	0.982263	0.942818	1.02336
ebi-a-GCST90001406	gen_samplesize_1finngen_R9_O15_PRE_OR_ECLAMPSIA	outcome	|| id:ebi-a-GCST90001406	MR Egger	20	-0.00611619	0.0317641	0.849467	-0.0683739	0.0561415	0.993902	0.933911	1.05775
ebi-a-GCST90001406	gen_samplesize_1finngen_R9_O15_PRE_OR_ECLAMPSIA	outcome	|| id:ebi-a-GCST90001406	Weighted median	20	-0.013902	0.0280734	0.620458	-0.0689259	0.0411219	0.986194	0.933396	1.04198
ebi-a-GCST90001406	gen_samplesize_1finngen_R9_O15_PRE_OR_ECLAMPSIA	outcome	|| id:ebi-a-GCST90001406	Weighted mode	20	-0.00370807	0.0281396	0.896548	-0.0588617	0.0514455	0.996299	0.942837	1.05279
ebi-a-GCST90001407	gen_samplesize_1finngen_R9_O15_PRE_OR_ECLAMPSIA	outcome	|| id:ebi-a-GCST90001407	Inverse variance weighted	10	-0.000702645	0.0143013	0.960814	-0.0287331	0.0273278	0.999298	0.971676	1.0277
ebi-a-GCST90001407	gen_samplesize_1finngen_R9_O15_PRE_OR_ECLAMPSIA	outcome	|| id:ebi-a-GCST90001407	MR Egger	10	0.00244751	0.017355	0.891335	-0.0315682	0.0364633	1.00245	0.968925	1.03714
ebi-a-GCST90001407	gen_samplesize_1finngen_R9_O15_PRE_OR_ECLAMPSIA	outcome	|| id:ebi-a-GCST90001407	Weighted median	10	0.000967452	0.0147362	0.947655	-0.0279154	0.0298503	1.00097	0.972471	1.0303
ebi-a-GCST90001407	gen_samplesize_1finngen_R9_O15_PRE_OR_ECLAMPSIA	outcome	|| id:ebi-a-GCST90001407	Weighted mode	10	-0.000414889	0.0138343	0.97673	-0.0275302	0.0267004	0.999585	0.972845	1.02706
ebi-a-GCST90001408	gen_samplesize_1finngen_R9_O15_PRE_OR_ECLAMPSIA	outcome	|| id:ebi-a-GCST90001408	Inverse variance weighted	20	0.010243	0.0219255	0.640377	-0.032731	0.053217	1.0103	0.967799	1.05466
ebi-a-GCST90001408	gen_samplesize_1finngen_R9_O15_PRE_OR_ECLAMPSIA	outcome	|| id:ebi-a-GCST90001408	MR Egger	20	0.0193453	0.0336311	0.572263	-0.0465716	0.0852622	1.01953	0.954496	1.089
ebi-a-GCST90001408	gen_samplesize_1finngen_R9_O15_PRE_OR_ECLAMPSIA	outcome	|| id:ebi-a-GCST90001408	Weighted median	20	0.0125545	0.0293232	0.668547	-0.0449189	0.0700279	1.01263	0.956075	1.07254
ebi-a-GCST90001408	gen_samplesize_1finngen_R9_O15_PRE_OR_ECLAMPSIA	outcome	|| id:ebi-a-GCST90001408	Weighted mode	20	0.00281481	0.0268846	0.917712	-0.0498791	0.0555087	1.00282	0.951344	1.05708
ebi-a-GCST90001409	gen_samplesize_1finngen_R9_O15_PRE_OR_ECLAMPSIA	outcome	|| id:ebi-a-GCST90001409	Inverse variance weighted	13	-0.00716189	0.0346828	0.836403	-0.0751401	0.0608163	0.992864	0.927613	1.0627
ebi-a-GCST90001409	gen_samplesize_1finngen_R9_O15_PRE_OR_ECLAMPSIA	outcome	|| id:ebi-a-GCST90001409	MR Egger	13	0.022244	0.0735577	0.767987	-0.121929	0.166417	1.02249	0.885211	1.18107
ebi-a-GCST90001409	gen_samplesize_1finngen_R9_O15_PRE_OR_ECLAMPSIA	outcome	|| id:ebi-a-GCST90001409	Weighted median	13	0.0135129	0.0478437	0.777608	-0.0802607	0.107286	1.0136	0.922876	1.11325
ebi-a-GCST90001409	gen_samplesize_1finngen_R9_O15_PRE_OR_ECLAMPSIA	outcome	|| id:ebi-a-GCST90001409	Weighted mode	13	0.0231804	0.058508	0.698918	-0.0914953	0.137856	1.02345	0.912566	1.14781
ebi-a-GCST90001410	gen_samplesize_1finngen_R9_O15_PRE_OR_ECLAMPSIA	outcome	|| id:ebi-a-GCST90001410	Inverse variance weighted	13	0.00645386	0.0432724	0.881439	-0.0783601	0.0912678	1.00647	0.924631	1.09556
ebi-a-GCST90001410	gen_samplesize_1finngen_R9_O15_PRE_OR_ECLAMPSIA	outcome	|| id:ebi-a-GCST90001410	MR Egger	13	-0.0117119	0.0949507	0.904057	-0.197815	0.174391	0.988356	0.820521	1.19052
ebi-a-GCST90001410	gen_samplesize_1finngen_R9_O15_PRE_OR_ECLAMPSIA	outcome	|| id:ebi-a-GCST90001410	Weighted median	13	-0.00791551	0.0568828	0.889328	-0.119406	0.103575	0.992116	0.887448	1.10913
ebi-a-GCST90001410	gen_samplesize_1finngen_R9_O15_PRE_OR_ECLAMPSIA	outcome	|| id:ebi-a-GCST90001410	Weighted mode	13	-0.0615346	0.107338	0.577042	-0.271918	0.148848	0.94032	0.761917	1.1605
ebi-a-GCST90001411	gen_samplesize_1finngen_R9_O15_PRE_OR_ECLAMPSIA	outcome	|| id:ebi-a-GCST90001411	Inverse variance weighted	9	-0.0218866	0.0434704	0.614625	-0.107089	0.0633154	0.978351	0.898446	1.06536
ebi-a-GCST90001411	gen_samplesize_1finngen_R9_O15_PRE_OR_ECLAMPSIA	outcome	|| id:ebi-a-GCST90001411	MR Egger	9	0.00596284	0.0786516	0.941689	-0.148194	0.16012	1.00598	0.862264	1.17365
ebi-a-GCST90001411	gen_samplesize_1finngen_R9_O15_PRE_OR_ECLAMPSIA	outcome	|| id:ebi-a-GCST90001411	Weighted median	9	-0.0228494	0.0560965	0.68377	-0.132799	0.0870997	0.97741	0.875641	1.09101
ebi-a-GCST90001411	gen_samplesize_1finngen_R9_O15_PRE_OR_ECLAMPSIA	outcome	|| id:ebi-a-GCST90001411	Weighted mode	9	-0.0266285	0.0545774	0.638708	-0.1336	0.0803432	0.973723	0.87494	1.08366
ebi-a-GCST90001412	gen_samplesize_1finngen_R9_O15_PRE_OR_ECLAMPSIA	outcome	|| id:ebi-a-GCST90001412	Inverse variance weighted	14	0.0274175	0.0526997	0.602884	-0.075874	0.130709	1.0278	0.926933	1.13964
ebi-a-GCST90001412	gen_samplesize_1finngen_R9_O15_PRE_OR_ECLAMPSIA	outcome	|| id:ebi-a-GCST90001412	MR Egger	14	0.189605	0.142824	0.209032	-0.0903306	0.46954	1.20877	0.913629	1.59926
ebi-a-GCST90001412	gen_samplesize_1finngen_R9_O15_PRE_OR_ECLAMPSIA	outcome	|| id:ebi-a-GCST90001412	Weighted median	14	0.0267249	0.065534	0.683419	-0.101722	0.155172	1.02709	0.903281	1.16786
ebi-a-GCST90001412	gen_samplesize_1finngen_R9_O15_PRE_OR_ECLAMPSIA	outcome	|| id:ebi-a-GCST90001412	Weighted mode	14	-0.00186941	0.106968	0.986322	-0.211526	0.207787	0.998132	0.809348	1.23095
ebi-a-GCST90001413	gen_samplesize_1finngen_R9_O15_PRE_OR_ECLAMPSIA	outcome	|| id:ebi-a-GCST90001413	Inverse variance weighted	12	-0.0512986	0.021748	0.0183354	-0.0939247	-0.00867253	0.949995	0.910351	0.991365
ebi-a-GCST90001413	gen_samplesize_1finngen_R9_O15_PRE_OR_ECLAMPSIA	outcome	|| id:ebi-a-GCST90001413	MR Egger	12	-0.0385046	0.0284512	0.205741	-0.0942688	0.0172597	0.962227	0.910038	1.01741
ebi-a-GCST90001413	gen_samplesize_1finngen_R9_O15_PRE_OR_ECLAMPSIA	outcome	|| id:ebi-a-GCST90001413	Weighted median	12	-0.0251351	0.0277947	0.365828	-0.0796127	0.0293424	0.975178	0.923474	1.02978
ebi-a-GCST90001413	gen_samplesize_1finngen_R9_O15_PRE_OR_ECLAMPSIA	outcome	|| id:ebi-a-GCST90001413	Weighted mode	12	-0.0350735	0.0267116	0.215899	-0.0874282	0.0172812	0.965534	0.916285	1.01743
ebi-a-GCST90001414	gen_samplesize_1finngen_R9_O15_PRE_OR_ECLAMPSIA	outcome	|| id:ebi-a-GCST90001414	Inverse variance weighted	10	0.0383244	0.0313828	0.222014	-0.0231859	0.0998348	1.03907	0.977081	1.10499
ebi-a-GCST90001414	gen_samplesize_1finngen_R9_O15_PRE_OR_ECLAMPSIA	outcome	|| id:ebi-a-GCST90001414	MR Egger	10	0.0393261	0.0466445	0.423661	-0.0520972	0.130749	1.04011	0.949237	1.13968
ebi-a-GCST90001414	gen_samplesize_1finngen_R9_O15_PRE_OR_ECLAMPSIA	outcome	|| id:ebi-a-GCST90001414	Weighted median	10	0.0595693	0.0398051	0.134517	-0.0184487	0.137587	1.06138	0.98172	1.1475
ebi-a-GCST90001414	gen_samplesize_1finngen_R9_O15_PRE_OR_ECLAMPSIA	outcome	|| id:ebi-a-GCST90001414	Weighted mode	10	0.0596178	0.043921	0.207716	-0.0264673	0.145703	1.06143	0.97388	1.15685
ebi-a-GCST90001415	gen_samplesize_1finngen_R9_O15_PRE_OR_ECLAMPSIA	outcome	|| id:ebi-a-GCST90001415	Inverse variance weighted	9	-0.00503644	0.0415415	0.903502	-0.0864578	0.0763849	0.994976	0.917174	1.07938
ebi-a-GCST90001415	gen_samplesize_1finngen_R9_O15_PRE_OR_ECLAMPSIA	outcome	|| id:ebi-a-GCST90001415	MR Egger	9	0.0963603	0.0929132	0.334181	-0.0857496	0.27847	1.10116	0.917824	1.32111
ebi-a-GCST90001415	gen_samplesize_1finngen_R9_O15_PRE_OR_ECLAMPSIA	outcome	|| id:ebi-a-GCST90001415	Weighted median	9	0.00817576	0.0556221	0.883142	-0.100844	0.117195	1.00821	0.904074	1.12434
ebi-a-GCST90001415	gen_samplesize_1finngen_R9_O15_PRE_OR_ECLAMPSIA	outcome	|| id:ebi-a-GCST90001415	Weighted mode	9	0.0346606	0.0639323	0.602488	-0.0906466	0.159968	1.03527	0.91334	1.17347
ebi-a-GCST90001416	gen_samplesize_1finngen_R9_O15_PRE_OR_ECLAMPSIA	outcome	|| id:ebi-a-GCST90001416	Inverse variance weighted	9	0.0171933	0.0136948	0.209313	-0.00964857	0.0440351	1.01734	0.990398	1.04502
ebi-a-GCST90001416	gen_samplesize_1finngen_R9_O15_PRE_OR_ECLAMPSIA	outcome	|| id:ebi-a-GCST90001416	MR Egger	9	0.022691	0.0161946	0.203913	-0.00905043	0.0544325	1.02295	0.99099	1.05594
ebi-a-GCST90001416	gen_samplesize_1finngen_R9_O15_PRE_OR_ECLAMPSIA	outcome	|| id:ebi-a-GCST90001416	Weighted median	9	0.017788	0.0166991	0.286784	-0.0149424	0.0505183	1.01795	0.985169	1.05182
ebi-a-GCST90001416	gen_samplesize_1finngen_R9_O15_PRE_OR_ECLAMPSIA	outcome	|| id:ebi-a-GCST90001416	Weighted mode	9	0.0195901	0.0153704	0.238247	-0.0105359	0.049716	1.01978	0.989519	1.05097
ebi-a-GCST90001417	gen_samplesize_1finngen_R9_O15_PRE_OR_ECLAMPSIA	outcome	|| id:ebi-a-GCST90001417	Inverse variance weighted	15	-0.0185784	0.0252914	0.462598	-0.0681496	0.0309927	0.981593	0.934121	1.03148
ebi-a-GCST90001417	gen_samplesize_1finngen_R9_O15_PRE_OR_ECLAMPSIA	outcome	|| id:ebi-a-GCST90001417	MR Egger	15	-0.0625731	0.0401397	0.143028	-0.141247	0.0161007	0.939344	0.868275	1.01623
ebi-a-GCST90001417	gen_samplesize_1finngen_R9_O15_PRE_OR_ECLAMPSIA	outcome	|| id:ebi-a-GCST90001417	Weighted median	15	-0.02556	0.0350011	0.465229	-0.0941621	0.043042	0.974764	0.910135	1.04398
ebi-a-GCST90001417	gen_samplesize_1finngen_R9_O15_PRE_OR_ECLAMPSIA	outcome	|| id:ebi-a-GCST90001417	Weighted mode	15	-0.0304759	0.0340706	0.386179	-0.0972543	0.0363025	0.969984	0.907325	1.03697
ebi-a-GCST90001418	gen_samplesize_1finngen_R9_O15_PRE_OR_ECLAMPSIA	outcome	|| id:ebi-a-GCST90001418	Inverse variance weighted	12	-0.00167872	0.0132285	0.899018	-0.0276065	0.024249	0.998323	0.972771	1.02455
ebi-a-GCST90001418	gen_samplesize_1finngen_R9_O15_PRE_OR_ECLAMPSIA	outcome	|| id:ebi-a-GCST90001418	MR Egger	12	0.00035862	0.01571	0.982237	-0.0304329	0.0311502	1.00036	0.970025	1.03164
ebi-a-GCST90001418	gen_samplesize_1finngen_R9_O15_PRE_OR_ECLAMPSIA	outcome	|| id:ebi-a-GCST90001418	Weighted median	12	4.71718e-06	0.0147386	0.999745	-0.028883	0.0288925	1	0.97153	1.02931
ebi-a-GCST90001418	gen_samplesize_1finngen_R9_O15_PRE_OR_ECLAMPSIA	outcome	|| id:ebi-a-GCST90001418	Weighted mode	12	0.000805904	0.0142149	0.955805	-0.0270552	0.028667	1.00081	0.973307	1.02908
ebi-a-GCST90001419	gen_samplesize_1finngen_R9_O15_PRE_OR_ECLAMPSIA	outcome	|| id:ebi-a-GCST90001419	Inverse variance weighted	9	0.0504695	0.0295744	0.0879107	-0.00749643	0.108435	1.05176	0.992532	1.11453
ebi-a-GCST90001419	gen_samplesize_1finngen_R9_O15_PRE_OR_ECLAMPSIA	outcome	|| id:ebi-a-GCST90001419	MR Egger	9	0.0548462	0.0398835	0.211478	-0.0233255	0.133018	1.05638	0.976944	1.14227
ebi-a-GCST90001419	gen_samplesize_1finngen_R9_O15_PRE_OR_ECLAMPSIA	outcome	|| id:ebi-a-GCST90001419	Weighted median	9	0.061674	0.03487	0.0769465	-0.00667115	0.130019	1.06362	0.993351	1.13885
ebi-a-GCST90001419	gen_samplesize_1finngen_R9_O15_PRE_OR_ECLAMPSIA	outcome	|| id:ebi-a-GCST90001419	Weighted mode	9	0.0550991	0.0318772	0.122164	-0.00738026	0.117578	1.05665	0.992647	1.12477
ebi-a-GCST90001420	gen_samplesize_1finngen_R9_O15_PRE_OR_ECLAMPSIA	outcome	|| id:ebi-a-GCST90001420	Inverse variance weighted	11	-0.0149965	0.0185299	0.418334	-0.051315	0.021322	0.985115	0.949979	1.02155
ebi-a-GCST90001420	gen_samplesize_1finngen_R9_O15_PRE_OR_ECLAMPSIA	outcome	|| id:ebi-a-GCST90001420	MR Egger	11	-0.0158079	0.0225115	0.500303	-0.0599305	0.0283147	0.984316	0.94183	1.02872
ebi-a-GCST90001420	gen_samplesize_1finngen_R9_O15_PRE_OR_ECLAMPSIA	outcome	|| id:ebi-a-GCST90001420	Weighted median	11	-0.0171723	0.0249393	0.491098	-0.0660533	0.0317087	0.982974	0.936081	1.03222
ebi-a-GCST90001420	gen_samplesize_1finngen_R9_O15_PRE_OR_ECLAMPSIA	outcome	|| id:ebi-a-GCST90001420	Weighted mode	11	-0.0137075	0.0212333	0.533091	-0.0553248	0.0279097	0.986386	0.946178	1.0283
ebi-a-GCST90001421	gen_samplesize_1finngen_R9_O15_PRE_OR_ECLAMPSIA	outcome	|| id:ebi-a-GCST90001421	Inverse variance weighted	12	0.023809	0.0183422	0.194273	-0.0121418	0.0597598	1.02409	0.987932	1.06158
ebi-a-GCST90001421	gen_samplesize_1finngen_R9_O15_PRE_OR_ECLAMPSIA	outcome	|| id:ebi-a-GCST90001421	MR Egger	12	0.0189993	0.0233018	0.433856	-0.0266721	0.0646708	1.01918	0.97368	1.06681
ebi-a-GCST90001421	gen_samplesize_1finngen_R9_O15_PRE_OR_ECLAMPSIA	outcome	|| id:ebi-a-GCST90001421	Weighted median	12	0.0208665	0.0194901	0.284341	-0.0173341	0.0590672	1.02109	0.982815	1.06085
ebi-a-GCST90001421	gen_samplesize_1finngen_R9_O15_PRE_OR_ECLAMPSIA	outcome	|| id:ebi-a-GCST90001421	Weighted mode	12	0.0196702	0.019053	0.324052	-0.0176736	0.057014	1.01986	0.982482	1.05867
ebi-a-GCST90001422	gen_samplesize_1finngen_R9_O15_PRE_OR_ECLAMPSIA	outcome	|| id:ebi-a-GCST90001422	Inverse variance weighted	12	-0.0499031	0.0229216	0.029471	-0.0948294	-0.0049769	0.951322	0.909528	0.995035
ebi-a-GCST90001422	gen_samplesize_1finngen_R9_O15_PRE_OR_ECLAMPSIA	outcome	|| id:ebi-a-GCST90001422	MR Egger	12	-0.058689	0.0318317	0.0950165	-0.121079	0.00370108	0.943	0.885964	1.00371
ebi-a-GCST90001422	gen_samplesize_1finngen_R9_O15_PRE_OR_ECLAMPSIA	outcome	|| id:ebi-a-GCST90001422	Weighted median	12	-0.0675751	0.0350701	0.0539976	-0.136313	0.00116236	0.934658	0.87257	1.00116
ebi-a-GCST90001422	gen_samplesize_1finngen_R9_O15_PRE_OR_ECLAMPSIA	outcome	|| id:ebi-a-GCST90001422	Weighted mode	12	-0.0691525	0.0332656	0.0618264	-0.134353	-0.00395188	0.933184	0.874281	0.996056
ebi-a-GCST90001423	gen_samplesize_1finngen_R9_O15_PRE_OR_ECLAMPSIA	outcome	|| id:ebi-a-GCST90001423	Inverse variance weighted	10	-0.0213323	0.0460817	0.64342	-0.111652	0.0689879	0.978894	0.894355	1.07142
ebi-a-GCST90001423	gen_samplesize_1finngen_R9_O15_PRE_OR_ECLAMPSIA	outcome	|| id:ebi-a-GCST90001423	MR Egger	10	0.0557579	0.0986273	0.587343	-0.137552	0.249067	1.05734	0.871489	1.28283
ebi-a-GCST90001423	gen_samplesize_1finngen_R9_O15_PRE_OR_ECLAMPSIA	outcome	|| id:ebi-a-GCST90001423	Weighted median	10	-0.0149388	0.0654384	0.819423	-0.143198	0.11332	0.985172	0.866582	1.11999
ebi-a-GCST90001423	gen_samplesize_1finngen_R9_O15_PRE_OR_ECLAMPSIA	outcome	|| id:ebi-a-GCST90001423	Weighted mode	10	-0.00936065	0.073268	0.901149	-0.152966	0.134245	0.990683	0.858159	1.14367
ebi-a-GCST90001424	gen_samplesize_1finngen_R9_O15_PRE_OR_ECLAMPSIA	outcome	|| id:ebi-a-GCST90001424	Inverse variance weighted	14	-0.0197656	0.0147722	0.180886	-0.0487191	0.00918783	0.980428	0.952449	1.00923
ebi-a-GCST90001424	gen_samplesize_1finngen_R9_O15_PRE_OR_ECLAMPSIA	outcome	|| id:ebi-a-GCST90001424	MR Egger	14	-0.00774068	0.0165567	0.6485	-0.0401918	0.0247105	0.992289	0.960605	1.02502
ebi-a-GCST90001424	gen_samplesize_1finngen_R9_O15_PRE_OR_ECLAMPSIA	outcome	|| id:ebi-a-GCST90001424	Weighted median	14	-0.00104951	0.0181663	0.95393	-0.0366554	0.0345564	0.998951	0.964008	1.03516
ebi-a-GCST90001424	gen_samplesize_1finngen_R9_O15_PRE_OR_ECLAMPSIA	outcome	|| id:ebi-a-GCST90001424	Weighted mode	14	-0.0107863	0.0159048	0.509551	-0.0419596	0.0203871	0.989272	0.958908	1.0206
ebi-a-GCST90001425	gen_samplesize_1finngen_R9_O15_PRE_OR_ECLAMPSIA	outcome	|| id:ebi-a-GCST90001425	Inverse variance weighted	17	-0.0156277	0.0198695	0.431566	-0.054572	0.0233166	0.984494	0.94689	1.02359
ebi-a-GCST90001425	gen_samplesize_1finngen_R9_O15_PRE_OR_ECLAMPSIA	outcome	|| id:ebi-a-GCST90001425	MR Egger	17	-0.00249666	0.0242618	0.919402	-0.0500498	0.0450565	0.997506	0.951182	1.04609
ebi-a-GCST90001425	gen_samplesize_1finngen_R9_O15_PRE_OR_ECLAMPSIA	outcome	|| id:ebi-a-GCST90001425	Weighted median	17	-0.00142986	0.0258892	0.955955	-0.0521727	0.049313	0.998571	0.949165	1.05055
ebi-a-GCST90001425	gen_samplesize_1finngen_R9_O15_PRE_OR_ECLAMPSIA	outcome	|| id:ebi-a-GCST90001425	Weighted mode	17	0.00111715	0.0243969	0.964044	-0.0467008	0.0489351	1.00112	0.954373	1.05015
ebi-a-GCST90001426	gen_samplesize_1finngen_R9_O15_PRE_OR_ECLAMPSIA	outcome	|| id:ebi-a-GCST90001426	Inverse variance weighted	14	0.0457434	0.0199036	0.0215478	0.0067323	0.0847545	1.04681	1.00676	1.08845
ebi-a-GCST90001426	gen_samplesize_1finngen_R9_O15_PRE_OR_ECLAMPSIA	outcome	|| id:ebi-a-GCST90001426	MR Egger	14	0.0234894	0.0251059	0.367919	-0.0257181	0.0726969	1.02377	0.97461	1.0754
ebi-a-GCST90001426	gen_samplesize_1finngen_R9_O15_PRE_OR_ECLAMPSIA	outcome	|| id:ebi-a-GCST90001426	Weighted median	14	0.0198559	0.0269802	0.461764	-0.0330253	0.0727371	1.02005	0.967514	1.07545
ebi-a-GCST90001426	gen_samplesize_1finngen_R9_O15_PRE_OR_ECLAMPSIA	outcome	|| id:ebi-a-GCST90001426	Weighted mode	14	0.000328003	0.0239645	0.989288	-0.0466425	0.0472985	1.00033	0.954429	1.04843
ebi-a-GCST90001427	gen_samplesize_1finngen_R9_O15_PRE_OR_ECLAMPSIA	outcome	|| id:ebi-a-GCST90001427	Inverse variance weighted	13	0.0327731	0.042256	0.437994	-0.0500486	0.115595	1.03332	0.951183	1.12254
ebi-a-GCST90001427	gen_samplesize_1finngen_R9_O15_PRE_OR_ECLAMPSIA	outcome	|| id:ebi-a-GCST90001427	MR Egger	13	-0.00782378	0.0699724	0.912986	-0.14497	0.129322	0.992207	0.865048	1.13806
ebi-a-GCST90001427	gen_samplesize_1finngen_R9_O15_PRE_OR_ECLAMPSIA	outcome	|| id:ebi-a-GCST90001427	Weighted median	13	0.0110739	0.0539232	0.837287	-0.0946155	0.116763	1.01114	0.909723	1.12385
ebi-a-GCST90001427	gen_samplesize_1finngen_R9_O15_PRE_OR_ECLAMPSIA	outcome	|| id:ebi-a-GCST90001427	Weighted mode	13	-0.00042499	0.0532292	0.993761	-0.104754	0.103904	0.999575	0.900546	1.10949
ebi-a-GCST90001428	gen_samplesize_1finngen_R9_O15_PRE_OR_ECLAMPSIA	outcome	|| id:ebi-a-GCST90001428	Inverse variance weighted	12	-0.00280982	0.0343572	0.93482	-0.07015	0.0645304	0.997194	0.932254	1.06666
ebi-a-GCST90001428	gen_samplesize_1finngen_R9_O15_PRE_OR_ECLAMPSIA	outcome	|| id:ebi-a-GCST90001428	MR Egger	12	-0.0274435	0.0611337	0.663069	-0.147265	0.0923785	0.97293	0.863065	1.09678
ebi-a-GCST90001428	gen_samplesize_1finngen_R9_O15_PRE_OR_ECLAMPSIA	outcome	|| id:ebi-a-GCST90001428	Weighted median	12	0.00790658	0.0482079	0.869723	-0.0865808	0.102394	1.00794	0.917061	1.10782
ebi-a-GCST90001428	gen_samplesize_1finngen_R9_O15_PRE_OR_ECLAMPSIA	outcome	|| id:ebi-a-GCST90001428	Weighted mode	12	0.00373656	0.0487642	0.940298	-0.0918412	0.0993143	1.00374	0.91225	1.10441
ebi-a-GCST90001429	gen_samplesize_1finngen_R9_O15_PRE_OR_ECLAMPSIA	outcome	|| id:ebi-a-GCST90001429	Inverse variance weighted	14	0.0265716	0.0269833	0.324751	-0.0263157	0.079459	1.02693	0.974028	1.0827
ebi-a-GCST90001429	gen_samplesize_1finngen_R9_O15_PRE_OR_ECLAMPSIA	outcome	|| id:ebi-a-GCST90001429	MR Egger	14	0.0230379	0.0355827	0.529535	-0.0467043	0.09278	1.02331	0.95437	1.09722
ebi-a-GCST90001429	gen_samplesize_1finngen_R9_O15_PRE_OR_ECLAMPSIA	outcome	|| id:ebi-a-GCST90001429	Weighted median	14	0.0199184	0.0353721	0.57336	-0.0494109	0.0892476	1.02012	0.95179	1.09335
ebi-a-GCST90001429	gen_samplesize_1finngen_R9_O15_PRE_OR_ECLAMPSIA	outcome	|| id:ebi-a-GCST90001429	Weighted mode	14	0.0249264	0.033842	0.474478	-0.041404	0.0912568	1.02524	0.959441	1.09555
ebi-a-GCST90001430	gen_samplesize_1finngen_R9_O15_PRE_OR_ECLAMPSIA	outcome	|| id:ebi-a-GCST90001430	Inverse variance weighted	20	-0.00968677	0.0145655	0.506019	-0.0382351	0.0188616	0.99036	0.962487	1.01904
ebi-a-GCST90001430	gen_samplesize_1finngen_R9_O15_PRE_OR_ECLAMPSIA	outcome	|| id:ebi-a-GCST90001430	MR Egger	20	0.00397448	0.0166368	0.813884	-0.0286336	0.0365825	1.00398	0.971772	1.03726
ebi-a-GCST90001430	gen_samplesize_1finngen_R9_O15_PRE_OR_ECLAMPSIA	outcome	|| id:ebi-a-GCST90001430	Weighted median	20	-0.000610802	0.0167828	0.970968	-0.0335051	0.0322835	0.999389	0.96705	1.03281
ebi-a-GCST90001430	gen_samplesize_1finngen_R9_O15_PRE_OR_ECLAMPSIA	outcome	|| id:ebi-a-GCST90001430	Weighted mode	20	-0.000508645	0.0159097	0.974829	-0.0316916	0.0306743	0.999491	0.968805	1.03115
ebi-a-GCST90001431	gen_samplesize_1finngen_R9_O15_PRE_OR_ECLAMPSIA	outcome	|| id:ebi-a-GCST90001431	Inverse variance weighted	13	0.00108174	0.0423775	0.979635	-0.0819781	0.0841416	1.00108	0.921292	1.08778
ebi-a-GCST90001431	gen_samplesize_1finngen_R9_O15_PRE_OR_ECLAMPSIA	outcome	|| id:ebi-a-GCST90001431	MR Egger	13	0.0192717	0.094951	0.842868	-0.166832	0.205376	1.01946	0.846342	1.22799
ebi-a-GCST90001431	gen_samplesize_1finngen_R9_O15_PRE_OR_ECLAMPSIA	outcome	|| id:ebi-a-GCST90001431	Weighted median	13	-0.0186916	0.0587115	0.750209	-0.133766	0.0963828	0.981482	0.874795	1.10118
ebi-a-GCST90001431	gen_samplesize_1finngen_R9_O15_PRE_OR_ECLAMPSIA	outcome	|| id:ebi-a-GCST90001431	Weighted mode	13	-0.0267211	0.0624803	0.676464	-0.149182	0.0957402	0.973633	0.861412	1.10047
ebi-a-GCST90001432	gen_samplesize_1finngen_R9_O15_PRE_OR_ECLAMPSIA	outcome	|| id:ebi-a-GCST90001432	Inverse variance weighted	15	-0.0187631	0.0405319	0.64342	-0.0982057	0.0606795	0.981412	0.906462	1.06256
ebi-a-GCST90001432	gen_samplesize_1finngen_R9_O15_PRE_OR_ECLAMPSIA	outcome	|| id:ebi-a-GCST90001432	MR Egger	15	0.0175184	0.0867223	0.843039	-0.152457	0.187494	1.01767	0.858596	1.20622
ebi-a-GCST90001432	gen_samplesize_1finngen_R9_O15_PRE_OR_ECLAMPSIA	outcome	|| id:ebi-a-GCST90001432	Weighted median	15	-0.0355871	0.0513756	0.488508	-0.136283	0.0651092	0.965039	0.872595	1.06728
ebi-a-GCST90001432	gen_samplesize_1finngen_R9_O15_PRE_OR_ECLAMPSIA	outcome	|| id:ebi-a-GCST90001432	Weighted mode	15	-0.0355295	0.0632388	0.583115	-0.159478	0.0884186	0.965094	0.852589	1.09245
ebi-a-GCST90001433	gen_samplesize_1finngen_R9_O15_PRE_OR_ECLAMPSIA	outcome	|| id:ebi-a-GCST90001433	Inverse variance weighted	14	0.00764703	0.035978	0.83168	-0.0628698	0.0781639	1.00768	0.939066	1.0813
ebi-a-GCST90001433	gen_samplesize_1finngen_R9_O15_PRE_OR_ECLAMPSIA	outcome	|| id:ebi-a-GCST90001433	MR Egger	14	0.24709	0.0891768	0.0169372	0.0723034	0.421877	1.28029	1.07498	1.52482
ebi-a-GCST90001433	gen_samplesize_1finngen_R9_O15_PRE_OR_ECLAMPSIA	outcome	|| id:ebi-a-GCST90001433	Weighted median	14	0.0430334	0.0438178	0.326051	-0.0428495	0.128916	1.04397	0.958056	1.13759
ebi-a-GCST90001433	gen_samplesize_1finngen_R9_O15_PRE_OR_ECLAMPSIA	outcome	|| id:ebi-a-GCST90001433	Weighted mode	14	0.0296474	0.0501151	0.564275	-0.0685783	0.127873	1.03009	0.93372	1.13641
ebi-a-GCST90001434	gen_samplesize_1finngen_R9_O15_PRE_OR_ECLAMPSIA	outcome	|| id:ebi-a-GCST90001434	Inverse variance weighted	10	0.0357267	0.0315935	0.258129	-0.0261965	0.09765	1.03637	0.974144	1.10258
ebi-a-GCST90001434	gen_samplesize_1finngen_R9_O15_PRE_OR_ECLAMPSIA	outcome	|| id:ebi-a-GCST90001434	MR Egger	10	0.029726	0.0497146	0.566421	-0.0677145	0.127167	1.03017	0.934527	1.13561
ebi-a-GCST90001434	gen_samplesize_1finngen_R9_O15_PRE_OR_ECLAMPSIA	outcome	|| id:ebi-a-GCST90001434	Weighted median	10	0.0309889	0.0355764	0.383726	-0.0387408	0.100719	1.03147	0.962	1.10597
ebi-a-GCST90001434	gen_samplesize_1finngen_R9_O15_PRE_OR_ECLAMPSIA	outcome	|| id:ebi-a-GCST90001434	Weighted mode	10	0.0261577	0.034276	0.464908	-0.0410233	0.0933387	1.0265	0.959807	1.09783
ebi-a-GCST90001435	gen_samplesize_1finngen_R9_O15_PRE_OR_ECLAMPSIA	outcome	|| id:ebi-a-GCST90001435	Inverse variance weighted	12	0.00113269	0.0116651	0.922646	-0.0217309	0.0239963	1.00113	0.978504	1.02429
ebi-a-GCST90001435	gen_samplesize_1finngen_R9_O15_PRE_OR_ECLAMPSIA	outcome	|| id:ebi-a-GCST90001435	MR Egger	12	0.0102103	0.0138697	0.478548	-0.0169744	0.037395	1.01026	0.983169	1.0381
ebi-a-GCST90001435	gen_samplesize_1finngen_R9_O15_PRE_OR_ECLAMPSIA	outcome	|| id:ebi-a-GCST90001435	Weighted median	12	-0.00060864	0.0144304	0.966357	-0.0288923	0.027675	0.999392	0.971521	1.02806
ebi-a-GCST90001435	gen_samplesize_1finngen_R9_O15_PRE_OR_ECLAMPSIA	outcome	|| id:ebi-a-GCST90001435	Weighted mode	12	0.00387176	0.013315	0.776628	-0.0222256	0.0299692	1.00388	0.97802	1.03042
ebi-a-GCST90001436	gen_samplesize_1finngen_R9_O15_PRE_OR_ECLAMPSIA	outcome	|| id:ebi-a-GCST90001436	Inverse variance weighted	16	0.00173691	0.014644	0.905586	-0.0269654	0.0304392	1.00174	0.973395	1.03091
ebi-a-GCST90001436	gen_samplesize_1finngen_R9_O15_PRE_OR_ECLAMPSIA	outcome	|| id:ebi-a-GCST90001436	MR Egger	16	-0.00303483	0.0169971	0.860849	-0.0363492	0.0302795	0.99697	0.964304	1.03074
ebi-a-GCST90001436	gen_samplesize_1finngen_R9_O15_PRE_OR_ECLAMPSIA	outcome	|| id:ebi-a-GCST90001436	Weighted median	16	-0.000245765	0.0143422	0.986328	-0.0283564	0.0278649	0.999754	0.972042	1.02826
ebi-a-GCST90001436	gen_samplesize_1finngen_R9_O15_PRE_OR_ECLAMPSIA	outcome	|| id:ebi-a-GCST90001436	Weighted mode	16	-0.00164908	0.0143153	0.909817	-0.029707	0.0264089	0.998352	0.97073	1.02676
ebi-a-GCST90001437	gen_samplesize_1finngen_R9_O15_PRE_OR_ECLAMPSIA	outcome	|| id:ebi-a-GCST90001437	Inverse variance weighted	11	0.0249183	0.0471216	0.596939	-0.0674401	0.117277	1.02523	0.934784	1.12443
ebi-a-GCST90001437	gen_samplesize_1finngen_R9_O15_PRE_OR_ECLAMPSIA	outcome	|| id:ebi-a-GCST90001437	MR Egger	11	0.101403	0.139388	0.485423	-0.171798	0.374603	1.10672	0.842149	1.45441
ebi-a-GCST90001437	gen_samplesize_1finngen_R9_O15_PRE_OR_ECLAMPSIA	outcome	|| id:ebi-a-GCST90001437	Weighted median	11	0.0560241	0.0677395	0.408207	-0.0767453	0.188794	1.05762	0.926126	1.20779
ebi-a-GCST90001437	gen_samplesize_1finngen_R9_O15_PRE_OR_ECLAMPSIA	outcome	|| id:ebi-a-GCST90001437	Weighted mode	11	0.0773693	0.102428	0.467457	-0.12339	0.278129	1.08044	0.883919	1.32066
ebi-a-GCST90001438	gen_samplesize_1finngen_R9_O15_PRE_OR_ECLAMPSIA	outcome	|| id:ebi-a-GCST90001438	Inverse variance weighted	12	0.0159607	0.0444653	0.719634	-0.0711912	0.103113	1.01609	0.931284	1.10862
ebi-a-GCST90001438	gen_samplesize_1finngen_R9_O15_PRE_OR_ECLAMPSIA	outcome	|| id:ebi-a-GCST90001438	MR Egger	12	-0.0654946	0.101436	0.533024	-0.264309	0.133319	0.936604	0.767737	1.14261
ebi-a-GCST90001438	gen_samplesize_1finngen_R9_O15_PRE_OR_ECLAMPSIA	outcome	|| id:ebi-a-GCST90001438	Weighted median	12	0.0035319	0.0611747	0.95396	-0.116371	0.123434	1.00354	0.890145	1.13138
ebi-a-GCST90001438	gen_samplesize_1finngen_R9_O15_PRE_OR_ECLAMPSIA	outcome	|| id:ebi-a-GCST90001438	Weighted mode	12	-0.0381456	0.10594	0.725614	-0.245788	0.169497	0.962573	0.782088	1.18471
ebi-a-GCST90001439	gen_samplesize_1finngen_R9_O15_PRE_OR_ECLAMPSIA	outcome	|| id:ebi-a-GCST90001439	Inverse variance weighted	7	0.00840368	0.0506075	0.868113	-0.090787	0.107594	1.00844	0.913212	1.1136
ebi-a-GCST90001439	gen_samplesize_1finngen_R9_O15_PRE_OR_ECLAMPSIA	outcome	|| id:ebi-a-GCST90001439	MR Egger	7	-0.0996673	0.11588	0.429041	-0.326792	0.127457	0.905139	0.721234	1.13594
ebi-a-GCST90001439	gen_samplesize_1finngen_R9_O15_PRE_OR_ECLAMPSIA	outcome	|| id:ebi-a-GCST90001439	Weighted median	7	-0.0223288	0.063997	0.727161	-0.147763	0.103105	0.977919	0.862636	1.10861
ebi-a-GCST90001439	gen_samplesize_1finngen_R9_O15_PRE_OR_ECLAMPSIA	outcome	|| id:ebi-a-GCST90001439	Weighted mode	7	-0.0252363	0.068979	0.727026	-0.160435	0.109962	0.975079	0.851773	1.11624
ebi-a-GCST90001440	gen_samplesize_1finngen_R9_O15_PRE_OR_ECLAMPSIA	outcome	|| id:ebi-a-GCST90001440	Inverse variance weighted	11	0.0508508	0.0437275	0.244869	-0.0348551	0.136557	1.05217	0.965745	1.14632
ebi-a-GCST90001440	gen_samplesize_1finngen_R9_O15_PRE_OR_ECLAMPSIA	outcome	|| id:ebi-a-GCST90001440	MR Egger	11	0.169348	0.0854125	0.0787151	0.0019399	0.336757	1.18453	1.00194	1.4004
ebi-a-GCST90001440	gen_samplesize_1finngen_R9_O15_PRE_OR_ECLAMPSIA	outcome	|| id:ebi-a-GCST90001440	Weighted median	11	0.0722637	0.0545494	0.185258	-0.0346531	0.17918	1.07494	0.96594	1.19624
ebi-a-GCST90001440	gen_samplesize_1finngen_R9_O15_PRE_OR_ECLAMPSIA	outcome	|| id:ebi-a-GCST90001440	Weighted mode	11	0.0695682	0.0588902	0.264807	-0.0458565	0.184993	1.07205	0.955179	1.20321
ebi-a-GCST90001441	gen_samplesize_1finngen_R9_O15_PRE_OR_ECLAMPSIA	outcome	|| id:ebi-a-GCST90001441	Inverse variance weighted	13	-0.0685251	0.0424959	0.106851	-0.151817	0.0147668	0.93377	0.859146	1.01488
ebi-a-GCST90001441	gen_samplesize_1finngen_R9_O15_PRE_OR_ECLAMPSIA	outcome	|| id:ebi-a-GCST90001441	MR Egger	13	-0.0519125	0.151055	0.737577	-0.347981	0.244156	0.949412	0.706112	1.27654
ebi-a-GCST90001441	gen_samplesize_1finngen_R9_O15_PRE_OR_ECLAMPSIA	outcome	|| id:ebi-a-GCST90001441	Weighted median	13	-0.061933	0.0579001	0.284775	-0.175417	0.0515511	0.939946	0.839107	1.0529
ebi-a-GCST90001441	gen_samplesize_1finngen_R9_O15_PRE_OR_ECLAMPSIA	outcome	|| id:ebi-a-GCST90001441	Weighted mode	13	-0.180287	0.102105	0.102853	-0.380413	0.0198396	0.835031	0.683579	1.02004
ebi-a-GCST90001442	gen_samplesize_1finngen_R9_O15_PRE_OR_ECLAMPSIA	outcome	|| id:ebi-a-GCST90001442	Inverse variance weighted	16	0.00412666	0.0129211	0.749442	-0.0211986	0.0294519	1.00414	0.979024	1.02989
ebi-a-GCST90001442	gen_samplesize_1finngen_R9_O15_PRE_OR_ECLAMPSIA	outcome	|| id:ebi-a-GCST90001442	MR Egger	16	0.00165808	0.0148535	0.912702	-0.0274547	0.0307709	1.00166	0.972919	1.03125
ebi-a-GCST90001442	gen_samplesize_1finngen_R9_O15_PRE_OR_ECLAMPSIA	outcome	|| id:ebi-a-GCST90001442	Weighted median	16	0.000904703	0.0149664	0.951798	-0.0284293	0.0302387	1.00091	0.971971	1.0307
ebi-a-GCST90001442	gen_samplesize_1finngen_R9_O15_PRE_OR_ECLAMPSIA	outcome	|| id:ebi-a-GCST90001442	Weighted mode	16	0.00098418	0.0140029	0.944896	-0.0264615	0.0284299	1.00098	0.973886	1.02884
ebi-a-GCST90001443	gen_samplesize_1finngen_R9_O15_PRE_OR_ECLAMPSIA	outcome	|| id:ebi-a-GCST90001443	Inverse variance weighted	8	0.0216132	0.0206704	0.295742	-0.0189009	0.0621273	1.02185	0.981277	1.0641
ebi-a-GCST90001443	gen_samplesize_1finngen_R9_O15_PRE_OR_ECLAMPSIA	outcome	|| id:ebi-a-GCST90001443	MR Egger	8	0.0210026	0.0276489	0.476259	-0.0331893	0.0751944	1.02122	0.967355	1.07809
ebi-a-GCST90001443	gen_samplesize_1finngen_R9_O15_PRE_OR_ECLAMPSIA	outcome	|| id:ebi-a-GCST90001443	Weighted median	8	0.0198111	0.0199819	0.321466	-0.0193535	0.0589756	1.02001	0.980833	1.06075
ebi-a-GCST90001443	gen_samplesize_1finngen_R9_O15_PRE_OR_ECLAMPSIA	outcome	|| id:ebi-a-GCST90001443	Weighted mode	8	0.0194805	0.0189708	0.338652	-0.0177023	0.0566634	1.01967	0.982453	1.0583
ebi-a-GCST90001444	gen_samplesize_1finngen_R9_O15_PRE_OR_ECLAMPSIA	outcome	|| id:ebi-a-GCST90001444	Inverse variance weighted	12	-0.0506738	0.0249832	0.0425277	-0.0996408	-0.00170682	0.950589	0.905162	0.998295
ebi-a-GCST90001444	gen_samplesize_1finngen_R9_O15_PRE_OR_ECLAMPSIA	outcome	|| id:ebi-a-GCST90001444	MR Egger	12	-0.069371	0.0351726	0.07685	-0.138309	-0.000432665	0.93298	0.870829	0.999567
ebi-a-GCST90001444	gen_samplesize_1finngen_R9_O15_PRE_OR_ECLAMPSIA	outcome	|| id:ebi-a-GCST90001444	Weighted median	12	-0.0741848	0.0372463	0.0464001	-0.147188	-0.00118203	0.9285	0.863132	0.998819
ebi-a-GCST90001444	gen_samplesize_1finngen_R9_O15_PRE_OR_ECLAMPSIA	outcome	|| id:ebi-a-GCST90001444	Weighted mode	12	-0.0712071	0.0318492	0.0470496	-0.133632	-0.00878268	0.931269	0.874912	0.991256
ebi-a-GCST90001445	gen_samplesize_1finngen_R9_O15_PRE_OR_ECLAMPSIA	outcome	|| id:ebi-a-GCST90001445	Inverse variance weighted	8	-0.0316712	0.0466876	0.497541	-0.123179	0.0598365	0.968825	0.884106	1.06166
ebi-a-GCST90001445	gen_samplesize_1finngen_R9_O15_PRE_OR_ECLAMPSIA	outcome	|| id:ebi-a-GCST90001445	MR Egger	8	-0.065102	0.0834542	0.464988	-0.228672	0.0984683	0.936972	0.795589	1.10348
ebi-a-GCST90001445	gen_samplesize_1finngen_R9_O15_PRE_OR_ECLAMPSIA	outcome	|| id:ebi-a-GCST90001445	Weighted median	8	-0.0511693	0.0592974	0.388178	-0.167392	0.0650536	0.950118	0.845868	1.06722
ebi-a-GCST90001445	gen_samplesize_1finngen_R9_O15_PRE_OR_ECLAMPSIA	outcome	|| id:ebi-a-GCST90001445	Weighted mode	8	-0.0615711	0.0667353	0.386903	-0.192372	0.0692302	0.940286	0.825	1.07168
ebi-a-GCST90001446	gen_samplesize_1finngen_R9_O15_PRE_OR_ECLAMPSIA	outcome	|| id:ebi-a-GCST90001446	Inverse variance weighted	9	0.0161962	0.0314091	0.606096	-0.0453656	0.0777581	1.01633	0.955648	1.08086
ebi-a-GCST90001446	gen_samplesize_1finngen_R9_O15_PRE_OR_ECLAMPSIA	outcome	|| id:ebi-a-GCST90001446	MR Egger	9	-0.00643065	0.0385113	0.872106	-0.0819127	0.0690514	0.99359	0.921352	1.07149
ebi-a-GCST90001446	gen_samplesize_1finngen_R9_O15_PRE_OR_ECLAMPSIA	outcome	|| id:ebi-a-GCST90001446	Weighted median	9	0.0190211	0.0315081	0.546051	-0.0427349	0.080777	1.0192	0.958165	1.08413
ebi-a-GCST90001446	gen_samplesize_1finngen_R9_O15_PRE_OR_ECLAMPSIA	outcome	|| id:ebi-a-GCST90001446	Weighted mode	9	0.0111497	0.0280624	0.701523	-0.0438526	0.066152	1.01121	0.957095	1.06839
ebi-a-GCST90001447	gen_samplesize_1finngen_R9_O15_PRE_OR_ECLAMPSIA	outcome	|| id:ebi-a-GCST90001447	Inverse variance weighted	15	0.0115681	0.0225631	0.60816	-0.0326555	0.0557917	1.01164	0.967872	1.05738
ebi-a-GCST90001447	gen_samplesize_1finngen_R9_O15_PRE_OR_ECLAMPSIA	outcome	|| id:ebi-a-GCST90001447	MR Egger	15	0.0186487	0.0326557	0.577691	-0.0453564	0.0826538	1.01882	0.955657	1.08617
ebi-a-GCST90001447	gen_samplesize_1finngen_R9_O15_PRE_OR_ECLAMPSIA	outcome	|| id:ebi-a-GCST90001447	Weighted median	15	0.0187756	0.03019	0.533998	-0.0403968	0.077948	1.01895	0.960408	1.08107
ebi-a-GCST90001447	gen_samplesize_1finngen_R9_O15_PRE_OR_ECLAMPSIA	outcome	|| id:ebi-a-GCST90001447	Weighted mode	15	0.0200893	0.0260338	0.453143	-0.030937	0.0711157	1.02029	0.969537	1.07371
ebi-a-GCST90001448	gen_samplesize_1finngen_R9_O15_PRE_OR_ECLAMPSIA	outcome	|| id:ebi-a-GCST90001448	Inverse variance weighted	6	0.0327448	0.0357018	0.359052	-0.0372308	0.10272	1.03329	0.963454	1.10818
ebi-a-GCST90001448	gen_samplesize_1finngen_R9_O15_PRE_OR_ECLAMPSIA	outcome	|| id:ebi-a-GCST90001448	MR Egger	6	0.0795202	0.0515258	0.197629	-0.0214703	0.180511	1.08277	0.978759	1.19783
ebi-a-GCST90001448	gen_samplesize_1finngen_R9_O15_PRE_OR_ECLAMPSIA	outcome	|| id:ebi-a-GCST90001448	Weighted median	6	0.0355726	0.0445235	0.424312	-0.0516934	0.122839	1.03621	0.94962	1.1307
ebi-a-GCST90001448	gen_samplesize_1finngen_R9_O15_PRE_OR_ECLAMPSIA	outcome	|| id:ebi-a-GCST90001448	Weighted mode	6	0.0463941	0.0419497	0.319102	-0.0358273	0.128615	1.04749	0.964807	1.13725
ebi-a-GCST90001449	gen_samplesize_1finngen_R9_O15_PRE_OR_ECLAMPSIA	outcome	|| id:ebi-a-GCST90001449	Inverse variance weighted	12	0.00188635	0.0280866	0.946453	-0.0531635	0.0569362	1.00189	0.948225	1.05859
ebi-a-GCST90001449	gen_samplesize_1finngen_R9_O15_PRE_OR_ECLAMPSIA	outcome	|| id:ebi-a-GCST90001449	MR Egger	12	-0.0400046	0.0554129	0.486871	-0.148614	0.0686046	0.960785	0.861902	1.07101
ebi-a-GCST90001449	gen_samplesize_1finngen_R9_O15_PRE_OR_ECLAMPSIA	outcome	|| id:ebi-a-GCST90001449	Weighted median	12	-0.0111043	0.0369477	0.763764	-0.0835217	0.0613131	0.988957	0.919871	1.06323
ebi-a-GCST90001449	gen_samplesize_1finngen_R9_O15_PRE_OR_ECLAMPSIA	outcome	|| id:ebi-a-GCST90001449	Weighted mode	12	-0.0027112	0.0361958	0.941636	-0.0736549	0.0682325	0.997292	0.928992	1.07061
ebi-a-GCST90001450	gen_samplesize_1finngen_R9_O15_PRE_OR_ECLAMPSIA	outcome	|| id:ebi-a-GCST90001450	Inverse variance weighted (multiplicative random effects)	9	-0.0243385	0.0263017	0.354778	-0.0758898	0.0272128	0.975955	0.926918	1.02759
ebi-a-GCST90001450	gen_samplesize_1finngen_R9_O15_PRE_OR_ECLAMPSIA	outcome	|| id:ebi-a-GCST90001450	MR Egger	9	-0.0159059	0.0344525	0.658318	-0.0834327	0.0516209	0.98422	0.919953	1.05298
ebi-a-GCST90001450	gen_samplesize_1finngen_R9_O15_PRE_OR_ECLAMPSIA	outcome	|| id:ebi-a-GCST90001450	Weighted median	9	-0.00755117	0.0243716	0.756687	-0.0553196	0.0402172	0.992477	0.946183	1.04104
ebi-a-GCST90001450	gen_samplesize_1finngen_R9_O15_PRE_OR_ECLAMPSIA	outcome	|| id:ebi-a-GCST90001450	Weighted mode	9	-0.0161686	0.0218943	0.48132	-0.0590815	0.0267442	0.983961	0.94263	1.02711
ebi-a-GCST90001451	gen_samplesize_1finngen_R9_O15_PRE_OR_ECLAMPSIA	outcome	|| id:ebi-a-GCST90001451	Inverse variance weighted (multiplicative random effects)	13	-0.108737	0.0376315	0.00385814	-0.182495	-0.0349797	0.896966	0.833189	0.965625
ebi-a-GCST90001451	gen_samplesize_1finngen_R9_O15_PRE_OR_ECLAMPSIA	outcome	|| id:ebi-a-GCST90001451	MR Egger	13	-0.144797	0.0946891	0.154453	-0.330387	0.0407941	0.865198	0.718645	1.04164
ebi-a-GCST90001451	gen_samplesize_1finngen_R9_O15_PRE_OR_ECLAMPSIA	outcome	|| id:ebi-a-GCST90001451	Weighted median	13	-0.0513911	0.0409309	0.209277	-0.131616	0.0288335	0.949907	0.876678	1.02925
ebi-a-GCST90001451	gen_samplesize_1finngen_R9_O15_PRE_OR_ECLAMPSIA	outcome	|| id:ebi-a-GCST90001451	Weighted mode	13	-0.053845	0.0481473	0.285311	-0.148214	0.0405237	0.947579	0.862247	1.04136
ebi-a-GCST90001452	gen_samplesize_1finngen_R9_O15_PRE_OR_ECLAMPSIA	outcome	|| id:ebi-a-GCST90001452	Inverse variance weighted	11	0.0460775	0.0208159	0.0268584	0.0052783	0.0868766	1.04716	1.00529	1.09076
ebi-a-GCST90001452	gen_samplesize_1finngen_R9_O15_PRE_OR_ECLAMPSIA	outcome	|| id:ebi-a-GCST90001452	MR Egger	11	0.0167296	0.029394	0.583176	-0.0408826	0.0743418	1.01687	0.959942	1.07717
ebi-a-GCST90001452	gen_samplesize_1finngen_R9_O15_PRE_OR_ECLAMPSIA	outcome	|| id:ebi-a-GCST90001452	Weighted median	11	0.0420412	0.0276278	0.128085	-0.0121094	0.0961918	1.04294	0.987964	1.10097
ebi-a-GCST90001452	gen_samplesize_1finngen_R9_O15_PRE_OR_ECLAMPSIA	outcome	|| id:ebi-a-GCST90001452	Weighted mode	11	0.0350187	0.0231834	0.161848	-0.0104208	0.0804581	1.03564	0.989633	1.08378
ebi-a-GCST90001453	gen_samplesize_1finngen_R9_O15_PRE_OR_ECLAMPSIA	outcome	|| id:ebi-a-GCST90001453	Inverse variance weighted	11	0.056311	0.0371454	0.129529	-0.016494	0.129116	1.05793	0.983641	1.13782
ebi-a-GCST90001453	gen_samplesize_1finngen_R9_O15_PRE_OR_ECLAMPSIA	outcome	|| id:ebi-a-GCST90001453	MR Egger	11	0.0765151	0.0812836	0.371111	-0.0828007	0.235831	1.07952	0.920535	1.26596
ebi-a-GCST90001453	gen_samplesize_1finngen_R9_O15_PRE_OR_ECLAMPSIA	outcome	|| id:ebi-a-GCST90001453	Weighted median	11	0.0330973	0.0492201	0.501308	-0.0633742	0.129569	1.03365	0.938592	1.13834
ebi-a-GCST90001453	gen_samplesize_1finngen_R9_O15_PRE_OR_ECLAMPSIA	outcome	|| id:ebi-a-GCST90001453	Weighted mode	11	0.0297504	0.0486263	0.554313	-0.0655572	0.125058	1.0302	0.936546	1.13321
ebi-a-GCST90001454	gen_samplesize_1finngen_R9_O15_PRE_OR_ECLAMPSIA	outcome	|| id:ebi-a-GCST90001454	Inverse variance weighted	6	0.00573865	0.054832	0.916647	-0.101732	0.113209	1.00576	0.903272	1.11987
ebi-a-GCST90001454	gen_samplesize_1finngen_R9_O15_PRE_OR_ECLAMPSIA	outcome	|| id:ebi-a-GCST90001454	MR Egger	6	-0.00689003	0.144486	0.964252	-0.290083	0.276302	0.993134	0.748202	1.31825
ebi-a-GCST90001454	gen_samplesize_1finngen_R9_O15_PRE_OR_ECLAMPSIA	outcome	|| id:ebi-a-GCST90001454	Weighted median	6	-0.00690256	0.0705356	0.922044	-0.145152	0.131347	0.993121	0.864891	1.14036
ebi-a-GCST90001454	gen_samplesize_1finngen_R9_O15_PRE_OR_ECLAMPSIA	outcome	|| id:ebi-a-GCST90001454	Weighted mode	6	-0.0103759	0.0894012	0.912122	-0.185602	0.16485	0.989678	0.830604	1.17922
ebi-a-GCST90001455	gen_samplesize_1finngen_R9_O15_PRE_OR_ECLAMPSIA	outcome	|| id:ebi-a-GCST90001455	Inverse variance weighted	5	-0.0349672	0.0577279	0.544698	-0.148114	0.0781796	0.965637	0.862333	1.08132
ebi-a-GCST90001455	gen_samplesize_1finngen_R9_O15_PRE_OR_ECLAMPSIA	outcome	|| id:ebi-a-GCST90001455	MR Egger	5	0.0568348	0.170782	0.761191	-0.277898	0.391568	1.05848	0.757374	1.4793
ebi-a-GCST90001455	gen_samplesize_1finngen_R9_O15_PRE_OR_ECLAMPSIA	outcome	|| id:ebi-a-GCST90001455	Weighted median	5	-0.0228596	0.0672346	0.733858	-0.154639	0.10892	0.9774	0.856724	1.11507
ebi-a-GCST90001455	gen_samplesize_1finngen_R9_O15_PRE_OR_ECLAMPSIA	outcome	|| id:ebi-a-GCST90001455	Weighted mode	5	0.00676599	0.0824831	0.938564	-0.154901	0.168433	1.00679	0.8565	1.18345
ebi-a-GCST90001456	gen_samplesize_1finngen_R9_O15_PRE_OR_ECLAMPSIA	outcome	|| id:ebi-a-GCST90001456	Inverse variance weighted	10	0.0298309	0.0447144	0.504681	-0.0578094	0.117471	1.03028	0.94383	1.12465
ebi-a-GCST90001456	gen_samplesize_1finngen_R9_O15_PRE_OR_ECLAMPSIA	outcome	|| id:ebi-a-GCST90001456	MR Egger	10	0.143682	0.0650245	0.0581121	0.0162338	0.27113	1.15452	1.01637	1.31145
ebi-a-GCST90001456	gen_samplesize_1finngen_R9_O15_PRE_OR_ECLAMPSIA	outcome	|| id:ebi-a-GCST90001456	Weighted median	10	0.0132596	0.0593017	0.823073	-0.102972	0.129491	1.01335	0.902152	1.13825
ebi-a-GCST90001456	gen_samplesize_1finngen_R9_O15_PRE_OR_ECLAMPSIA	outcome	|| id:ebi-a-GCST90001456	Weighted mode	10	-0.0132459	0.0662808	0.846044	-0.143156	0.116665	0.986841	0.866619	1.12374
ebi-a-GCST90001457	gen_samplesize_1finngen_R9_O15_PRE_OR_ECLAMPSIA	outcome	|| id:ebi-a-GCST90001457	Inverse variance weighted	11	0.0382228	0.0454261	0.400107	-0.0508123	0.127258	1.03896	0.950457	1.13571
ebi-a-GCST90001457	gen_samplesize_1finngen_R9_O15_PRE_OR_ECLAMPSIA	outcome	|| id:ebi-a-GCST90001457	MR Egger	11	0.170817	0.103525	0.133338	-0.0320913	0.373726	1.18627	0.968418	1.45314
ebi-a-GCST90001457	gen_samplesize_1finngen_R9_O15_PRE_OR_ECLAMPSIA	outcome	|| id:ebi-a-GCST90001457	Weighted median	11	0.0302532	0.0598692	0.613333	-0.0870905	0.147597	1.03072	0.916594	1.15905
ebi-a-GCST90001457	gen_samplesize_1finngen_R9_O15_PRE_OR_ECLAMPSIA	outcome	|| id:ebi-a-GCST90001457	Weighted mode	11	0.0290666	0.0675385	0.676053	-0.103309	0.161442	1.02949	0.901848	1.1752
ebi-a-GCST90001458	gen_samplesize_1finngen_R9_O15_PRE_OR_ECLAMPSIA	outcome	|| id:ebi-a-GCST90001458	Inverse variance weighted	12	-0.0801909	0.0269978	0.00297536	-0.133107	-0.0272752	0.92294	0.875372	0.973093
ebi-a-GCST90001458	gen_samplesize_1finngen_R9_O15_PRE_OR_ECLAMPSIA	outcome	|| id:ebi-a-GCST90001458	MR Egger	12	-0.11341	0.0422022	0.0228051	-0.196127	-0.0306938	0.892784	0.821908	0.969772
ebi-a-GCST90001458	gen_samplesize_1finngen_R9_O15_PRE_OR_ECLAMPSIA	outcome	|| id:ebi-a-GCST90001458	Weighted median	12	-0.088323	0.0359629	0.0140513	-0.15881	-0.0178358	0.915465	0.853158	0.982322
ebi-a-GCST90001458	gen_samplesize_1finngen_R9_O15_PRE_OR_ECLAMPSIA	outcome	|| id:ebi-a-GCST90001458	Weighted mode	12	-0.0916419	0.0372488	0.0316641	-0.16465	-0.0186342	0.912432	0.848191	0.981538
ebi-a-GCST90001459	gen_samplesize_1finngen_R9_O15_PRE_OR_ECLAMPSIA	outcome	|| id:ebi-a-GCST90001459	Inverse variance weighted	16	-0.026306	0.0281885	0.350707	-0.0815555	0.0289434	0.974037	0.921682	1.02937
ebi-a-GCST90001459	gen_samplesize_1finngen_R9_O15_PRE_OR_ECLAMPSIA	outcome	|| id:ebi-a-GCST90001459	MR Egger	16	-0.0665273	0.0489949	0.195997	-0.162557	0.0295027	0.935637	0.849967	1.02994
ebi-a-GCST90001459	gen_samplesize_1finngen_R9_O15_PRE_OR_ECLAMPSIA	outcome	|| id:ebi-a-GCST90001459	Weighted median	16	-0.0784394	0.0389607	0.0440834	-0.154802	-0.00207648	0.924558	0.856585	0.997926
ebi-a-GCST90001459	gen_samplesize_1finngen_R9_O15_PRE_OR_ECLAMPSIA	outcome	|| id:ebi-a-GCST90001459	Weighted mode	16	-0.0705075	0.0388308	0.0894469	-0.146616	0.0056009	0.931921	0.863626	1.00562
ebi-a-GCST90001460	gen_samplesize_1finngen_R9_O15_PRE_OR_ECLAMPSIA	outcome	|| id:ebi-a-GCST90001460	Inverse variance weighted	17	0.012132	0.0185217	0.512458	-0.0241706	0.0484346	1.01221	0.976119	1.04963
ebi-a-GCST90001460	gen_samplesize_1finngen_R9_O15_PRE_OR_ECLAMPSIA	outcome	|| id:ebi-a-GCST90001460	MR Egger	17	-0.000282448	0.0233622	0.990513	-0.0460724	0.0455075	0.999718	0.954973	1.04656
ebi-a-GCST90001460	gen_samplesize_1finngen_R9_O15_PRE_OR_ECLAMPSIA	outcome	|| id:ebi-a-GCST90001460	Weighted median	17	0.011794	0.0194848	0.544984	-0.0263962	0.0499843	1.01186	0.973949	1.05125
ebi-a-GCST90001460	gen_samplesize_1finngen_R9_O15_PRE_OR_ECLAMPSIA	outcome	|| id:ebi-a-GCST90001460	Weighted mode	17	0.00135342	0.0182669	0.941856	-0.0344498	0.0371566	1.00135	0.966137	1.03786
ebi-a-GCST90001461	gen_samplesize_1finngen_R9_O15_PRE_OR_ECLAMPSIA	outcome	|| id:ebi-a-GCST90001461	Inverse variance weighted	12	-0.016985	0.0313196	0.587602	-0.0783714	0.0444013	0.983158	0.924621	1.0454
ebi-a-GCST90001461	gen_samplesize_1finngen_R9_O15_PRE_OR_ECLAMPSIA	outcome	|| id:ebi-a-GCST90001461	MR Egger	12	-0.0334966	0.0545066	0.552583	-0.140329	0.0733364	0.967058	0.869072	1.07609
ebi-a-GCST90001461	gen_samplesize_1finngen_R9_O15_PRE_OR_ECLAMPSIA	outcome	|| id:ebi-a-GCST90001461	Weighted median	12	-0.0451203	0.0441927	0.307259	-0.131738	0.0414973	0.955882	0.876571	1.04237
ebi-a-GCST90001461	gen_samplesize_1finngen_R9_O15_PRE_OR_ECLAMPSIA	outcome	|| id:ebi-a-GCST90001461	Weighted mode	12	-0.0741399	0.0470268	0.143204	-0.166313	0.0180326	0.928542	0.846782	1.0182
ebi-a-GCST90001462	gen_samplesize_1finngen_R9_O15_PRE_OR_ECLAMPSIA	outcome	|| id:ebi-a-GCST90001462	Inverse variance weighted	11	-0.0323029	0.0160654	0.0443554	-0.063791	-0.000814778	0.968213	0.938201	0.999186
ebi-a-GCST90001462	gen_samplesize_1finngen_R9_O15_PRE_OR_ECLAMPSIA	outcome	|| id:ebi-a-GCST90001462	MR Egger	11	-0.0248074	0.0187671	0.218826	-0.061591	0.0119761	0.975498	0.940267	1.01205
ebi-a-GCST90001462	gen_samplesize_1finngen_R9_O15_PRE_OR_ECLAMPSIA	outcome	|| id:ebi-a-GCST90001462	Weighted median	11	-0.0230183	0.0201022	0.252182	-0.0624186	0.0163819	0.977245	0.93949	1.01652
ebi-a-GCST90001462	gen_samplesize_1finngen_R9_O15_PRE_OR_ECLAMPSIA	outcome	|| id:ebi-a-GCST90001462	Weighted mode	11	-0.0281558	0.0181071	0.151009	-0.0636458	0.00733419	0.972237	0.938337	1.00736
ebi-a-GCST90001463	gen_samplesize_1finngen_R9_O15_PRE_OR_ECLAMPSIA	outcome	|| id:ebi-a-GCST90001463	Inverse variance weighted	11	-0.0231106	0.0203228	0.255466	-0.0629433	0.0167222	0.977154	0.938997	1.01686
ebi-a-GCST90001463	gen_samplesize_1finngen_R9_O15_PRE_OR_ECLAMPSIA	outcome	|| id:ebi-a-GCST90001463	MR Egger	11	-0.0104986	0.0270863	0.707321	-0.0635877	0.0425905	0.989556	0.938392	1.04351
ebi-a-GCST90001463	gen_samplesize_1finngen_R9_O15_PRE_OR_ECLAMPSIA	outcome	|| id:ebi-a-GCST90001463	Weighted median	11	-0.00717474	0.0300572	0.811336	-0.0660869	0.0517374	0.992851	0.93605	1.0531
ebi-a-GCST90001463	gen_samplesize_1finngen_R9_O15_PRE_OR_ECLAMPSIA	outcome	|| id:ebi-a-GCST90001463	Weighted mode	11	0.000798011	0.0268067	0.976837	-0.0517431	0.0533391	1.0008	0.949573	1.05479
ebi-a-GCST90001464	gen_samplesize_1finngen_R9_O15_PRE_OR_ECLAMPSIA	outcome	|| id:ebi-a-GCST90001464	Inverse variance weighted	13	-0.0267687	0.0165792	0.106399	-0.059264	0.00572662	0.973586	0.942458	1.00574
ebi-a-GCST90001464	gen_samplesize_1finngen_R9_O15_PRE_OR_ECLAMPSIA	outcome	|| id:ebi-a-GCST90001464	MR Egger	13	-0.0164292	0.0213567	0.457931	-0.0582883	0.02543	0.983705	0.943378	1.02576
ebi-a-GCST90001464	gen_samplesize_1finngen_R9_O15_PRE_OR_ECLAMPSIA	outcome	|| id:ebi-a-GCST90001464	Weighted median	13	-0.00961527	0.0215232	0.655064	-0.0518008	0.0325703	0.990431	0.949518	1.03311
ebi-a-GCST90001464	gen_samplesize_1finngen_R9_O15_PRE_OR_ECLAMPSIA	outcome	|| id:ebi-a-GCST90001464	Weighted mode	13	-0.0102214	0.0193829	0.607567	-0.0482119	0.027769	0.989831	0.952932	1.02816
ebi-a-GCST90001465	gen_samplesize_1finngen_R9_O15_PRE_OR_ECLAMPSIA	outcome	|| id:ebi-a-GCST90001465	Inverse variance weighted (multiplicative random effects)	15	-0.0135674	0.0162944	0.405045	-0.0455044	0.0183696	0.986524	0.955515	1.01854
ebi-a-GCST90001465	gen_samplesize_1finngen_R9_O15_PRE_OR_ECLAMPSIA	outcome	|| id:ebi-a-GCST90001465	MR Egger	15	-0.00585919	0.0196976	0.770817	-0.0444665	0.0327481	0.994158	0.956508	1.03329
ebi-a-GCST90001465	gen_samplesize_1finngen_R9_O15_PRE_OR_ECLAMPSIA	outcome	|| id:ebi-a-GCST90001465	Weighted median	15	-0.000405462	0.0160527	0.979849	-0.0318687	0.0310577	0.999595	0.968634	1.03155
ebi-a-GCST90001465	gen_samplesize_1finngen_R9_O15_PRE_OR_ECLAMPSIA	outcome	|| id:ebi-a-GCST90001465	Weighted mode	15	-0.00915572	0.0144212	0.535744	-0.0374212	0.0191097	0.990886	0.96327	1.01929
ebi-a-GCST90001466	gen_samplesize_1finngen_R9_O15_PRE_OR_ECLAMPSIA	outcome	|| id:ebi-a-GCST90001466	Inverse variance weighted	14	0.0108433	0.0313177	0.729165	-0.0505393	0.0722259	1.0109	0.950717	1.0749
ebi-a-GCST90001466	gen_samplesize_1finngen_R9_O15_PRE_OR_ECLAMPSIA	outcome	|| id:ebi-a-GCST90001466	MR Egger	14	-0.073111	0.0514224	0.180559	-0.173899	0.0276769	0.929498	0.840382	1.02806
ebi-a-GCST90001466	gen_samplesize_1finngen_R9_O15_PRE_OR_ECLAMPSIA	outcome	|| id:ebi-a-GCST90001466	Weighted median	14	0.0171804	0.0407264	0.673136	-0.0626434	0.0970041	1.01733	0.939278	1.10186
ebi-a-GCST90001466	gen_samplesize_1finngen_R9_O15_PRE_OR_ECLAMPSIA	outcome	|| id:ebi-a-GCST90001466	Weighted mode	14	-0.00220045	0.0450713	0.961804	-0.0905401	0.0861392	0.997802	0.913438	1.08996
ebi-a-GCST90001467	gen_samplesize_1finngen_R9_O15_PRE_OR_ECLAMPSIA	outcome	|| id:ebi-a-GCST90001467	Inverse variance weighted	19	0.0148716	0.0293355	0.612189	-0.0426259	0.0723691	1.01498	0.95827	1.07505
ebi-a-GCST90001467	gen_samplesize_1finngen_R9_O15_PRE_OR_ECLAMPSIA	outcome	|| id:ebi-a-GCST90001467	MR Egger	19	0.00894059	0.0535297	0.869324	-0.0959775	0.113859	1.00898	0.908484	1.12059
ebi-a-GCST90001467	gen_samplesize_1finngen_R9_O15_PRE_OR_ECLAMPSIA	outcome	|| id:ebi-a-GCST90001467	Weighted median	19	-0.00363697	0.0405812	0.928588	-0.0831762	0.0759023	0.99637	0.920189	1.07886
ebi-a-GCST90001467	gen_samplesize_1finngen_R9_O15_PRE_OR_ECLAMPSIA	outcome	|| id:ebi-a-GCST90001467	Weighted mode	19	-0.0312732	0.0509119	0.546729	-0.131061	0.0685142	0.969211	0.877165	1.07092
ebi-a-GCST90001468	gen_samplesize_1finngen_R9_O15_PRE_OR_ECLAMPSIA	outcome	|| id:ebi-a-GCST90001468	Inverse variance weighted	9	-0.070577	0.0290172	0.0150055	-0.127451	-0.0137033	0.931856	0.880337	0.98639
ebi-a-GCST90001468	gen_samplesize_1finngen_R9_O15_PRE_OR_ECLAMPSIA	outcome	|| id:ebi-a-GCST90001468	MR Egger	9	-0.065339	0.044075	0.181781	-0.151726	0.021048	0.93675	0.859224	1.02127
ebi-a-GCST90001468	gen_samplesize_1finngen_R9_O15_PRE_OR_ECLAMPSIA	outcome	|| id:ebi-a-GCST90001468	Weighted median	9	-0.0730309	0.03196	0.0223086	-0.135672	-0.0103893	0.929572	0.873129	0.989665
ebi-a-GCST90001468	gen_samplesize_1finngen_R9_O15_PRE_OR_ECLAMPSIA	outcome	|| id:ebi-a-GCST90001468	Weighted mode	9	-0.0731703	0.0338488	0.0626253	-0.139514	-0.0068266	0.929443	0.869781	0.993197
ebi-a-GCST90001469	gen_samplesize_1finngen_R9_O15_PRE_OR_ECLAMPSIA	outcome	|| id:ebi-a-GCST90001469	Inverse variance weighted	13	-0.0377761	0.0162923	0.0204145	-0.0697091	-0.00584312	0.962928	0.932665	0.994174
ebi-a-GCST90001469	gen_samplesize_1finngen_R9_O15_PRE_OR_ECLAMPSIA	outcome	|| id:ebi-a-GCST90001469	MR Egger	13	-0.0552829	0.023449	0.037976	-0.101243	-0.0093228	0.946217	0.903713	0.990721
ebi-a-GCST90001469	gen_samplesize_1finngen_R9_O15_PRE_OR_ECLAMPSIA	outcome	|| id:ebi-a-GCST90001469	Weighted median	13	-0.0596037	0.0216646	0.0059378	-0.102066	-0.017141	0.942138	0.90297	0.983005
ebi-a-GCST90001469	gen_samplesize_1finngen_R9_O15_PRE_OR_ECLAMPSIA	outcome	|| id:ebi-a-GCST90001469	Weighted mode	13	-0.0559453	0.0203629	0.017687	-0.0958566	-0.0160339	0.945591	0.908594	0.984094
ebi-a-GCST90001470	gen_samplesize_1finngen_R9_O15_PRE_OR_ECLAMPSIA	outcome	|| id:ebi-a-GCST90001470	Inverse variance weighted	15	-0.00528803	0.0262729	0.840485	-0.0567829	0.0462069	0.994726	0.944799	1.04729
ebi-a-GCST90001470	gen_samplesize_1finngen_R9_O15_PRE_OR_ECLAMPSIA	outcome	|| id:ebi-a-GCST90001470	MR Egger	15	0.0195484	0.0420687	0.649849	-0.0629063	0.102003	1.01974	0.939031	1.10739
ebi-a-GCST90001470	gen_samplesize_1finngen_R9_O15_PRE_OR_ECLAMPSIA	outcome	|| id:ebi-a-GCST90001470	Weighted median	15	-0.00666115	0.0388177	0.863751	-0.0827438	0.0694215	0.993361	0.920587	1.07189
ebi-a-GCST90001470	gen_samplesize_1finngen_R9_O15_PRE_OR_ECLAMPSIA	outcome	|| id:ebi-a-GCST90001470	Weighted mode	15	-0.0123525	0.0352468	0.731212	-0.0814362	0.0567312	0.987723	0.921792	1.05837
ebi-a-GCST90001471	gen_samplesize_1finngen_R9_O15_PRE_OR_ECLAMPSIA	outcome	|| id:ebi-a-GCST90001471	Inverse variance weighted	9	-0.0239449	0.022359	0.284201	-0.0677686	0.0198787	0.976339	0.934477	1.02008
ebi-a-GCST90001471	gen_samplesize_1finngen_R9_O15_PRE_OR_ECLAMPSIA	outcome	|| id:ebi-a-GCST90001471	MR Egger	9	-0.0408958	0.0325615	0.249428	-0.104716	0.0229249	0.959929	0.90058	1.02319
ebi-a-GCST90001471	gen_samplesize_1finngen_R9_O15_PRE_OR_ECLAMPSIA	outcome	|| id:ebi-a-GCST90001471	Weighted median	9	-0.0427799	0.0294398	0.146187	-0.100482	0.014922	0.958122	0.904401	1.01503
ebi-a-GCST90001471	gen_samplesize_1finngen_R9_O15_PRE_OR_ECLAMPSIA	outcome	|| id:ebi-a-GCST90001471	Weighted mode	9	-0.0408976	0.0273021	0.17252	-0.0944097	0.0126146	0.959927	0.90991	1.01269
ebi-a-GCST90001472	gen_samplesize_1finngen_R9_O15_PRE_OR_ECLAMPSIA	outcome	|| id:ebi-a-GCST90001472	Inverse variance weighted	11	-0.030269	0.0205825	0.141395	-0.0706107	0.0100727	0.970185	0.931825	1.01012
ebi-a-GCST90001472	gen_samplesize_1finngen_R9_O15_PRE_OR_ECLAMPSIA	outcome	|| id:ebi-a-GCST90001472	MR Egger	11	-0.0340404	0.0288996	0.269049	-0.0906835	0.0226028	0.966532	0.913307	1.02286
ebi-a-GCST90001472	gen_samplesize_1finngen_R9_O15_PRE_OR_ECLAMPSIA	outcome	|| id:ebi-a-GCST90001472	Weighted median	11	-0.0529416	0.0274986	0.0541987	-0.106839	0.000955714	0.948435	0.89867	1.00096
ebi-a-GCST90001472	gen_samplesize_1finngen_R9_O15_PRE_OR_ECLAMPSIA	outcome	|| id:ebi-a-GCST90001472	Weighted mode	11	-0.0413916	0.0233271	0.106391	-0.0871127	0.00432961	0.959453	0.916574	1.00434
ebi-a-GCST90001473	gen_samplesize_1finngen_R9_O15_PRE_OR_ECLAMPSIA	outcome	|| id:ebi-a-GCST90001473	Inverse variance weighted	11	-0.0174982	0.0236002	0.458424	-0.0637546	0.0287581	0.982654	0.938235	1.02918
ebi-a-GCST90001473	gen_samplesize_1finngen_R9_O15_PRE_OR_ECLAMPSIA	outcome	|| id:ebi-a-GCST90001473	MR Egger	11	-0.0495822	0.0268262	0.0976182	-0.102162	0.0029971	0.951627	0.902884	1.003
ebi-a-GCST90001473	gen_samplesize_1finngen_R9_O15_PRE_OR_ECLAMPSIA	outcome	|| id:ebi-a-GCST90001473	Weighted median	11	-0.0524199	0.0260957	0.0445631	-0.103567	-0.00127231	0.94893	0.901615	0.998728
ebi-a-GCST90001473	gen_samplesize_1finngen_R9_O15_PRE_OR_ECLAMPSIA	outcome	|| id:ebi-a-GCST90001473	Weighted mode	11	-0.0375319	0.0229452	0.132942	-0.0825045	0.00744066	0.963164	0.920807	1.00747
ebi-a-GCST90001474	gen_samplesize_1finngen_R9_O15_PRE_OR_ECLAMPSIA	outcome	|| id:ebi-a-GCST90001474	Inverse variance weighted	15	-0.0102752	0.0222974	0.644923	-0.053978	0.0334276	0.989777	0.947453	1.03399
ebi-a-GCST90001474	gen_samplesize_1finngen_R9_O15_PRE_OR_ECLAMPSIA	outcome	|| id:ebi-a-GCST90001474	MR Egger	15	-0.0270339	0.0326486	0.422596	-0.0910251	0.0369573	0.973328	0.912995	1.03765
ebi-a-GCST90001474	gen_samplesize_1finngen_R9_O15_PRE_OR_ECLAMPSIA	outcome	|| id:ebi-a-GCST90001474	Weighted median	15	-0.0465439	0.0344758	0.177002	-0.114117	0.0210287	0.954523	0.892154	1.02125
ebi-a-GCST90001474	gen_samplesize_1finngen_R9_O15_PRE_OR_ECLAMPSIA	outcome	|| id:ebi-a-GCST90001474	Weighted mode	15	-0.0683232	0.0452021	0.152901	-0.156919	0.020273	0.933959	0.854773	1.02048
ebi-a-GCST90001475	gen_samplesize_1finngen_R9_O15_PRE_OR_ECLAMPSIA	outcome	|| id:ebi-a-GCST90001475	Inverse variance weighted	11	0.0225726	0.0269056	0.401495	-0.0301624	0.0753075	1.02283	0.970288	1.07822
ebi-a-GCST90001475	gen_samplesize_1finngen_R9_O15_PRE_OR_ECLAMPSIA	outcome	|| id:ebi-a-GCST90001475	MR Egger	11	-0.000359764	0.0495442	0.994365	-0.0974664	0.0967469	0.99964	0.907133	1.10158
ebi-a-GCST90001475	gen_samplesize_1finngen_R9_O15_PRE_OR_ECLAMPSIA	outcome	|| id:ebi-a-GCST90001475	Weighted median	11	-0.00261492	0.0360237	0.942133	-0.0732215	0.0679916	0.997388	0.929395	1.07036
ebi-a-GCST90001475	gen_samplesize_1finngen_R9_O15_PRE_OR_ECLAMPSIA	outcome	|| id:ebi-a-GCST90001475	Weighted mode	11	-0.0095016	0.0387359	0.811191	-0.085424	0.0664208	0.990543	0.918123	1.06868
ebi-a-GCST90001476	gen_samplesize_1finngen_R9_O15_PRE_OR_ECLAMPSIA	outcome	|| id:ebi-a-GCST90001476	Inverse variance weighted	6	0.0718189	0.0547432	0.189546	-0.0354778	0.179116	1.07446	0.965144	1.19616
ebi-a-GCST90001476	gen_samplesize_1finngen_R9_O15_PRE_OR_ECLAMPSIA	outcome	|| id:ebi-a-GCST90001476	MR Egger	6	-0.011537	0.240336	0.964015	-0.482596	0.459522	0.988529	0.617179	1.58332
ebi-a-GCST90001476	gen_samplesize_1finngen_R9_O15_PRE_OR_ECLAMPSIA	outcome	|| id:ebi-a-GCST90001476	Weighted median	6	0.0824983	0.0575433	0.151665	-0.0302865	0.195283	1.086	0.970168	1.21566
ebi-a-GCST90001476	gen_samplesize_1finngen_R9_O15_PRE_OR_ECLAMPSIA	outcome	|| id:ebi-a-GCST90001476	Weighted mode	6	0.117814	0.0660556	0.134578	-0.0116555	0.247283	1.12503	0.988412	1.28054
ebi-a-GCST90001477	gen_samplesize_1finngen_R9_O15_PRE_OR_ECLAMPSIA	outcome	|| id:ebi-a-GCST90001477	Inverse variance weighted	16	-0.00645477	0.0191283	0.73578	-0.0439461	0.0310366	0.993566	0.957005	1.03152
ebi-a-GCST90001477	gen_samplesize_1finngen_R9_O15_PRE_OR_ECLAMPSIA	outcome	|| id:ebi-a-GCST90001477	MR Egger	16	-0.02186	0.0262927	0.419697	-0.0733938	0.0296737	0.978377	0.929235	1.03012
ebi-a-GCST90001477	gen_samplesize_1finngen_R9_O15_PRE_OR_ECLAMPSIA	outcome	|| id:ebi-a-GCST90001477	Weighted median	16	0.000270575	0.0263609	0.99181	-0.0513969	0.051938	1.00027	0.949902	1.05331
ebi-a-GCST90001477	gen_samplesize_1finngen_R9_O15_PRE_OR_ECLAMPSIA	outcome	|| id:ebi-a-GCST90001477	Weighted mode	16	-0.00110652	0.0224628	0.961362	-0.0451336	0.0429205	0.998894	0.95587	1.04385
ebi-a-GCST90001478	gen_samplesize_1finngen_R9_O15_PRE_OR_ECLAMPSIA	outcome	|| id:ebi-a-GCST90001478	Inverse variance weighted	12	-0.0392098	0.0296954	0.186701	-0.0974127	0.0189931	0.961549	0.907182	1.01917
ebi-a-GCST90001478	gen_samplesize_1finngen_R9_O15_PRE_OR_ECLAMPSIA	outcome	|| id:ebi-a-GCST90001478	MR Egger	12	-0.0845054	0.0397747	0.0595601	-0.162464	-0.00654708	0.918967	0.850047	0.993474
ebi-a-GCST90001478	gen_samplesize_1finngen_R9_O15_PRE_OR_ECLAMPSIA	outcome	|| id:ebi-a-GCST90001478	Weighted median	12	-0.0280842	0.0345296	0.416025	-0.0957622	0.0395938	0.972306	0.90868	1.04039
ebi-a-GCST90001478	gen_samplesize_1finngen_R9_O15_PRE_OR_ECLAMPSIA	outcome	|| id:ebi-a-GCST90001478	Weighted mode	12	-0.0480516	0.0276077	0.10963	-0.102163	0.00605956	0.953085	0.902883	1.00608
ebi-a-GCST90001479	gen_samplesize_1finngen_R9_O15_PRE_OR_ECLAMPSIA	outcome	|| id:ebi-a-GCST90001479	Inverse variance weighted (multiplicative random effects)	9	0.0035061	0.0499597	0.944051	-0.0944149	0.101427	1.00351	0.909905	1.10675
ebi-a-GCST90001479	gen_samplesize_1finngen_R9_O15_PRE_OR_ECLAMPSIA	outcome	|| id:ebi-a-GCST90001479	MR Egger	9	-0.0819366	0.0625987	0.231891	-0.20463	0.0407567	0.92133	0.814949	1.0416
ebi-a-GCST90001479	gen_samplesize_1finngen_R9_O15_PRE_OR_ECLAMPSIA	outcome	|| id:ebi-a-GCST90001479	Weighted median	9	-0.0361408	0.0397046	0.362695	-0.113962	0.0416802	0.964504	0.892292	1.04256
ebi-a-GCST90001479	gen_samplesize_1finngen_R9_O15_PRE_OR_ECLAMPSIA	outcome	|| id:ebi-a-GCST90001479	Weighted mode	9	-0.0269428	0.0386857	0.505873	-0.102767	0.0488812	0.973417	0.902337	1.0501
ebi-a-GCST90001480	gen_samplesize_1finngen_R9_O15_PRE_OR_ECLAMPSIA	outcome	|| id:ebi-a-GCST90001480	Inverse variance weighted	19	0.0155107	0.0225269	0.491111	-0.028642	0.0596634	1.01563	0.971764	1.06148
ebi-a-GCST90001480	gen_samplesize_1finngen_R9_O15_PRE_OR_ECLAMPSIA	outcome	|| id:ebi-a-GCST90001480	MR Egger	19	0.0277085	0.0366283	0.45972	-0.0440831	0.0995	1.0281	0.956874	1.10462
ebi-a-GCST90001480	gen_samplesize_1finngen_R9_O15_PRE_OR_ECLAMPSIA	outcome	|| id:ebi-a-GCST90001480	Weighted median	19	0.00871473	0.0324368	0.788185	-0.0548614	0.0722909	1.00875	0.946616	1.07497
ebi-a-GCST90001480	gen_samplesize_1finngen_R9_O15_PRE_OR_ECLAMPSIA	outcome	|| id:ebi-a-GCST90001480	Weighted mode	19	0.00820769	0.0309058	0.793587	-0.0523676	0.068783	1.00824	0.94898	1.0712
ebi-a-GCST90001481	gen_samplesize_1finngen_R9_O15_PRE_OR_ECLAMPSIA	outcome	|| id:ebi-a-GCST90001481	Inverse variance weighted	20	0.0125806	0.0119607	0.29288	-0.0108624	0.0360237	1.01266	0.989196	1.03668
ebi-a-GCST90001481	gen_samplesize_1finngen_R9_O15_PRE_OR_ECLAMPSIA	outcome	|| id:ebi-a-GCST90001481	MR Egger	20	0.0062008	0.0150102	0.684408	-0.0232192	0.0356208	1.00622	0.977048	1.03626
ebi-a-GCST90001481	gen_samplesize_1finngen_R9_O15_PRE_OR_ECLAMPSIA	outcome	|| id:ebi-a-GCST90001481	Weighted median	20	0.0120033	0.0144812	0.407169	-0.0163799	0.0403865	1.01208	0.983753	1.04121
ebi-a-GCST90001481	gen_samplesize_1finngen_R9_O15_PRE_OR_ECLAMPSIA	outcome	|| id:ebi-a-GCST90001481	Weighted mode	20	0.00947892	0.0128263	0.468927	-0.0156607	0.0346186	1.00952	0.984461	1.03522
ebi-a-GCST90001482	gen_samplesize_1finngen_R9_O15_PRE_OR_ECLAMPSIA	outcome	|| id:ebi-a-GCST90001482	Inverse variance weighted	24	0.0104242	0.0126445	0.409707	-0.0143589	0.0352074	1.01048	0.985744	1.03583
ebi-a-GCST90001482	gen_samplesize_1finngen_R9_O15_PRE_OR_ECLAMPSIA	outcome	|| id:ebi-a-GCST90001482	MR Egger	24	0.0191046	0.0158234	0.240113	-0.0119093	0.0501186	1.01929	0.988161	1.0514
ebi-a-GCST90001482	gen_samplesize_1finngen_R9_O15_PRE_OR_ECLAMPSIA	outcome	|| id:ebi-a-GCST90001482	Weighted median	24	0.0122997	0.0138919	0.375949	-0.0149284	0.0395278	1.01238	0.985182	1.04032
ebi-a-GCST90001482	gen_samplesize_1finngen_R9_O15_PRE_OR_ECLAMPSIA	outcome	|| id:ebi-a-GCST90001482	Weighted mode	24	0.0113602	0.0122712	0.364182	-0.0126913	0.0354117	1.01142	0.987389	1.03605
ebi-a-GCST90001483	gen_samplesize_1finngen_R9_O15_PRE_OR_ECLAMPSIA	outcome	|| id:ebi-a-GCST90001483	Inverse variance weighted	22	0.00204452	0.0166853	0.902476	-0.0306587	0.0347477	1.00205	0.969807	1.03536
ebi-a-GCST90001483	gen_samplesize_1finngen_R9_O15_PRE_OR_ECLAMPSIA	outcome	|| id:ebi-a-GCST90001483	MR Egger	22	0.00465772	0.0240338	0.848288	-0.0424485	0.0517639	1.00467	0.95844	1.05313
ebi-a-GCST90001483	gen_samplesize_1finngen_R9_O15_PRE_OR_ECLAMPSIA	outcome	|| id:ebi-a-GCST90001483	Weighted median	22	0.00923289	0.0196309	0.638123	-0.0292436	0.0477094	1.00928	0.97118	1.04887
ebi-a-GCST90001483	gen_samplesize_1finngen_R9_O15_PRE_OR_ECLAMPSIA	outcome	|| id:ebi-a-GCST90001483	Weighted mode	22	0.00520086	0.0186003	0.78251	-0.0312557	0.0416574	1.00521	0.969228	1.04254
ebi-a-GCST90001484	gen_samplesize_1finngen_R9_O15_PRE_OR_ECLAMPSIA	outcome	|| id:ebi-a-GCST90001484	Inverse variance weighted	17	0.00779343	0.0158175	0.622217	-0.0232088	0.0387956	1.00782	0.977058	1.03956
ebi-a-GCST90001484	gen_samplesize_1finngen_R9_O15_PRE_OR_ECLAMPSIA	outcome	|| id:ebi-a-GCST90001484	MR Egger	17	0.0160491	0.0240351	0.514447	-0.0310598	0.0631579	1.01618	0.969418	1.0652
ebi-a-GCST90001484	gen_samplesize_1finngen_R9_O15_PRE_OR_ECLAMPSIA	outcome	|| id:ebi-a-GCST90001484	Weighted median	17	0.0179746	0.0181086	0.320903	-0.0175182	0.0534674	1.01814	0.982634	1.05492
ebi-a-GCST90001484	gen_samplesize_1finngen_R9_O15_PRE_OR_ECLAMPSIA	outcome	|| id:ebi-a-GCST90001484	Weighted mode	17	0.0141721	0.0175206	0.430449	-0.0201684	0.0485125	1.01427	0.980034	1.04971
ebi-a-GCST90001485	gen_samplesize_1finngen_R9_O15_PRE_OR_ECLAMPSIA	outcome	|| id:ebi-a-GCST90001485	Inverse variance weighted	27	-0.00302339	0.00481681	0.530217	-0.0124643	0.00641755	0.996981	0.987613	1.00644
ebi-a-GCST90001485	gen_samplesize_1finngen_R9_O15_PRE_OR_ECLAMPSIA	outcome	|| id:ebi-a-GCST90001485	MR Egger	27	-0.00525041	0.00515834	0.318499	-0.0153608	0.00485993	0.994763	0.984757	1.00487
ebi-a-GCST90001485	gen_samplesize_1finngen_R9_O15_PRE_OR_ECLAMPSIA	outcome	|| id:ebi-a-GCST90001485	Weighted median	27	-0.00476716	0.00525003	0.363864	-0.0150572	0.00552289	0.995244	0.985056	1.00554
ebi-a-GCST90001485	gen_samplesize_1finngen_R9_O15_PRE_OR_ECLAMPSIA	outcome	|| id:ebi-a-GCST90001485	Weighted mode	27	-0.00298781	0.00488997	0.5465	-0.0125721	0.00659654	0.997017	0.987507	1.00662
ebi-a-GCST90001486	gen_samplesize_1finngen_R9_O15_PRE_OR_ECLAMPSIA	outcome	|| id:ebi-a-GCST90001486	Inverse variance weighted	6	-0.00479585	0.0251118	0.848541	-0.054015	0.0444233	0.995216	0.947418	1.04542
ebi-a-GCST90001486	gen_samplesize_1finngen_R9_O15_PRE_OR_ECLAMPSIA	outcome	|| id:ebi-a-GCST90001486	MR Egger	6	-0.013133	0.0409466	0.764468	-0.0933883	0.0671222	0.986953	0.91084	1.06943
ebi-a-GCST90001486	gen_samplesize_1finngen_R9_O15_PRE_OR_ECLAMPSIA	outcome	|| id:ebi-a-GCST90001486	Weighted median	6	-0.0103425	0.024069	0.667411	-0.0575178	0.0368327	0.989711	0.944105	1.03752
ebi-a-GCST90001486	gen_samplesize_1finngen_R9_O15_PRE_OR_ECLAMPSIA	outcome	|| id:ebi-a-GCST90001486	Weighted mode	6	-0.0181193	0.0227633	0.462139	-0.0627354	0.0264967	0.982044	0.939192	1.02685
ebi-a-GCST90001487	gen_samplesize_1finngen_R9_O15_PRE_OR_ECLAMPSIA	outcome	|| id:ebi-a-GCST90001487	Inverse variance weighted (multiplicative random effects)	17	-0.00223114	0.0326501	0.945519	-0.0662253	0.061763	0.997771	0.93592	1.06371
ebi-a-GCST90001487	gen_samplesize_1finngen_R9_O15_PRE_OR_ECLAMPSIA	outcome	|| id:ebi-a-GCST90001487	MR Egger	17	0.0435111	0.0447574	0.346391	-0.0442134	0.131236	1.04447	0.95675	1.14024
ebi-a-GCST90001487	gen_samplesize_1finngen_R9_O15_PRE_OR_ECLAMPSIA	outcome	|| id:ebi-a-GCST90001487	Weighted median	17	0.00365798	0.0289326	0.899391	-0.0530499	0.0603659	1.00366	0.948333	1.06223
ebi-a-GCST90001487	gen_samplesize_1finngen_R9_O15_PRE_OR_ECLAMPSIA	outcome	|| id:ebi-a-GCST90001487	Weighted mode	17	0.0183293	0.0270741	0.508074	-0.0347359	0.0713944	1.0185	0.96586	1.074
ebi-a-GCST90001488	gen_samplesize_1finngen_R9_O15_PRE_OR_ECLAMPSIA	outcome	|| id:ebi-a-GCST90001488	Inverse variance weighted (multiplicative random effects)	10	-0.0448032	0.0556745	0.420973	-0.153925	0.0643188	0.956186	0.857336	1.06643
ebi-a-GCST90001488	gen_samplesize_1finngen_R9_O15_PRE_OR_ECLAMPSIA	outcome	|| id:ebi-a-GCST90001488	MR Egger	10	0.0474468	0.0764846	0.552288	-0.102463	0.197357	1.04859	0.902612	1.21818
ebi-a-GCST90001488	gen_samplesize_1finngen_R9_O15_PRE_OR_ECLAMPSIA	outcome	|| id:ebi-a-GCST90001488	Weighted median	10	0.0245292	0.042083	0.559976	-0.0579535	0.107012	1.02483	0.943694	1.11295
ebi-a-GCST90001488	gen_samplesize_1finngen_R9_O15_PRE_OR_ECLAMPSIA	outcome	|| id:ebi-a-GCST90001488	Weighted mode	10	0.025021	0.0390495	0.537656	-0.051516	0.101558	1.02534	0.949788	1.10689
ebi-a-GCST90001489	gen_samplesize_1finngen_R9_O15_PRE_OR_ECLAMPSIA	outcome	|| id:ebi-a-GCST90001489	Inverse variance weighted	23	0.0058671	0.0145615	0.687008	-0.0226734	0.0344076	1.00588	0.977582	1.03501
ebi-a-GCST90001489	gen_samplesize_1finngen_R9_O15_PRE_OR_ECLAMPSIA	outcome	|| id:ebi-a-GCST90001489	MR Egger	23	0.0208896	0.0236717	0.387511	-0.0255068	0.0672861	1.02111	0.974816	1.0696
ebi-a-GCST90001489	gen_samplesize_1finngen_R9_O15_PRE_OR_ECLAMPSIA	outcome	|| id:ebi-a-GCST90001489	Weighted median	23	0.0146608	0.0196325	0.455207	-0.0238188	0.0531404	1.01477	0.976463	1.05458
ebi-a-GCST90001489	gen_samplesize_1finngen_R9_O15_PRE_OR_ECLAMPSIA	outcome	|| id:ebi-a-GCST90001489	Weighted mode	23	0.0210883	0.0172057	0.233288	-0.0126349	0.0548116	1.02131	0.987445	1.05634
ebi-a-GCST90001490	gen_samplesize_1finngen_R9_O15_PRE_OR_ECLAMPSIA	outcome	|| id:ebi-a-GCST90001490	Inverse variance weighted	3	-0.0773196	0.0863318	0.370461	-0.24653	0.0918906	0.925594	0.781508	1.09624
ebi-a-GCST90001490	gen_samplesize_1finngen_R9_O15_PRE_OR_ECLAMPSIA	outcome	|| id:ebi-a-GCST90001490	MR Egger	3	-0.403018	0.385819	0.486122	-1.15922	0.353187	0.6683	0.31373	1.4236
ebi-a-GCST90001490	gen_samplesize_1finngen_R9_O15_PRE_OR_ECLAMPSIA	outcome	|| id:ebi-a-GCST90001490	Weighted median	3	-0.0729762	0.0947431	0.441149	-0.258673	0.11272	0.929623	0.772076	1.11932
ebi-a-GCST90001490	gen_samplesize_1finngen_R9_O15_PRE_OR_ECLAMPSIA	outcome	|| id:ebi-a-GCST90001490	Weighted mode	3	-0.0548276	0.0931201	0.615647	-0.237343	0.127688	0.946648	0.788721	1.1362
ebi-a-GCST90001491	gen_samplesize_1finngen_R9_O15_PRE_OR_ECLAMPSIA	outcome	|| id:ebi-a-GCST90001491	Inverse variance weighted	11	0.00517635	0.0144099	0.71943	-0.0230671	0.0334198	1.00519	0.977197	1.03398
ebi-a-GCST90001491	gen_samplesize_1finngen_R9_O15_PRE_OR_ECLAMPSIA	outcome	|| id:ebi-a-GCST90001491	MR Egger	11	0.0422622	0.0247053	0.121309	-0.00616014	0.0906845	1.04317	0.993859	1.09492
ebi-a-GCST90001491	gen_samplesize_1finngen_R9_O15_PRE_OR_ECLAMPSIA	outcome	|| id:ebi-a-GCST90001491	Weighted median	11	0.019723	0.0166916	0.237359	-0.0129925	0.0524386	1.01992	0.987091	1.05384
ebi-a-GCST90001491	gen_samplesize_1finngen_R9_O15_PRE_OR_ECLAMPSIA	outcome	|| id:ebi-a-GCST90001491	Weighted mode	11	0.0154413	0.0165909	0.373925	-0.0170768	0.0479594	1.01556	0.983068	1.04913
ebi-a-GCST90001492	gen_samplesize_1finngen_R9_O15_PRE_OR_ECLAMPSIA	outcome	|| id:ebi-a-GCST90001492	Inverse variance weighted (multiplicative random effects)	16	0.0126923	0.0219331	0.562803	-0.0302966	0.0556812	1.01277	0.970158	1.05726
ebi-a-GCST90001492	gen_samplesize_1finngen_R9_O15_PRE_OR_ECLAMPSIA	outcome	|| id:ebi-a-GCST90001492	MR Egger	16	-0.0174663	0.0255451	0.505296	-0.0675348	0.0326021	0.982685	0.934695	1.03314
ebi-a-GCST90001492	gen_samplesize_1finngen_R9_O15_PRE_OR_ECLAMPSIA	outcome	|| id:ebi-a-GCST90001492	Weighted median	16	-0.00183539	0.0182651	0.919959	-0.0376351	0.0339643	0.998166	0.963064	1.03455
ebi-a-GCST90001492	gen_samplesize_1finngen_R9_O15_PRE_OR_ECLAMPSIA	outcome	|| id:ebi-a-GCST90001492	Weighted mode	16	0.000217395	0.016148	0.989436	-0.0314327	0.0318675	1.00022	0.969056	1.03238
ebi-a-GCST90001493	gen_samplesize_1finngen_R9_O15_PRE_OR_ECLAMPSIA	outcome	|| id:ebi-a-GCST90001493	Inverse variance weighted (multiplicative random effects)	18	-0.0156491	0.0198792	0.43116	-0.0546122	0.0233141	0.984473	0.946852	1.02359
ebi-a-GCST90001493	gen_samplesize_1finngen_R9_O15_PRE_OR_ECLAMPSIA	outcome	|| id:ebi-a-GCST90001493	MR Egger	18	-0.00977606	0.0258326	0.710079	-0.060408	0.0408559	0.990272	0.94138	1.0417
ebi-a-GCST90001493	gen_samplesize_1finngen_R9_O15_PRE_OR_ECLAMPSIA	outcome	|| id:ebi-a-GCST90001493	Weighted median	18	-0.00160536	0.017514	0.926967	-0.0359329	0.0327222	0.998396	0.964705	1.03326
ebi-a-GCST90001493	gen_samplesize_1finngen_R9_O15_PRE_OR_ECLAMPSIA	outcome	|| id:ebi-a-GCST90001493	Weighted mode	18	-0.000723591	0.0169775	0.966501	-0.0339995	0.0325523	0.999277	0.966572	1.03309
ebi-a-GCST90001494	gen_samplesize_1finngen_R9_O15_PRE_OR_ECLAMPSIA	outcome	|| id:ebi-a-GCST90001494	Inverse variance weighted	17	0.017658	0.0150808	0.241643	-0.0119004	0.0472163	1.01781	0.98817	1.04835
ebi-a-GCST90001494	gen_samplesize_1finngen_R9_O15_PRE_OR_ECLAMPSIA	outcome	|| id:ebi-a-GCST90001494	MR Egger	17	0.0108989	0.0180525	0.555044	-0.0244841	0.0462819	1.01096	0.975813	1.04737
ebi-a-GCST90001494	gen_samplesize_1finngen_R9_O15_PRE_OR_ECLAMPSIA	outcome	|| id:ebi-a-GCST90001494	Weighted median	17	-0.00125972	0.0167132	0.939918	-0.0340177	0.0314982	0.998741	0.966554	1.032
ebi-a-GCST90001494	gen_samplesize_1finngen_R9_O15_PRE_OR_ECLAMPSIA	outcome	|| id:ebi-a-GCST90001494	Weighted mode	17	0.00106653	0.0148434	0.94361	-0.0280265	0.0301596	1.00107	0.972363	1.03062
ebi-a-GCST90001495	gen_samplesize_1finngen_R9_O15_PRE_OR_ECLAMPSIA	outcome	|| id:ebi-a-GCST90001495	Inverse variance weighted	14	0.015735	0.0145524	0.27958	-0.0127878	0.0442578	1.01586	0.987294	1.04525
ebi-a-GCST90001495	gen_samplesize_1finngen_R9_O15_PRE_OR_ECLAMPSIA	outcome	|| id:ebi-a-GCST90001495	MR Egger	14	0.0226438	0.025604	0.393864	-0.0275401	0.0728277	1.0229	0.972836	1.07555
ebi-a-GCST90001495	gen_samplesize_1finngen_R9_O15_PRE_OR_ECLAMPSIA	outcome	|| id:ebi-a-GCST90001495	Weighted median	14	0.0208775	0.0171574	0.223672	-0.012751	0.0545061	1.0211	0.98733	1.05602
ebi-a-GCST90001495	gen_samplesize_1finngen_R9_O15_PRE_OR_ECLAMPSIA	outcome	|| id:ebi-a-GCST90001495	Weighted mode	14	0.0159258	0.0164528	0.350725	-0.0163218	0.0481734	1.01605	0.983811	1.04935
ebi-a-GCST90001496	gen_samplesize_1finngen_R9_O15_PRE_OR_ECLAMPSIA	outcome	|| id:ebi-a-GCST90001496	Inverse variance weighted	18	0.00160579	0.0130059	0.901738	-0.0238858	0.0270974	1.00161	0.976397	1.02747
ebi-a-GCST90001496	gen_samplesize_1finngen_R9_O15_PRE_OR_ECLAMPSIA	outcome	|| id:ebi-a-GCST90001496	MR Egger	18	0.00887273	0.0172687	0.614411	-0.0249739	0.0427194	1.00891	0.975335	1.04364
ebi-a-GCST90001496	gen_samplesize_1finngen_R9_O15_PRE_OR_ECLAMPSIA	outcome	|| id:ebi-a-GCST90001496	Weighted median	18	-0.00212305	0.0193176	0.912487	-0.0399855	0.0357394	0.997879	0.960803	1.03639
ebi-a-GCST90001496	gen_samplesize_1finngen_R9_O15_PRE_OR_ECLAMPSIA	outcome	|| id:ebi-a-GCST90001496	Weighted mode	18	-0.000905835	0.0163569	0.956482	-0.0329654	0.0311537	0.999095	0.967572	1.03164
ebi-a-GCST90001497	gen_samplesize_1finngen_R9_O15_PRE_OR_ECLAMPSIA	outcome	|| id:ebi-a-GCST90001497	Inverse variance weighted	14	-0.00344707	0.0154517	0.823468	-0.0337324	0.0268383	0.996559	0.96683	1.0272
ebi-a-GCST90001497	gen_samplesize_1finngen_R9_O15_PRE_OR_ECLAMPSIA	outcome	|| id:ebi-a-GCST90001497	MR Egger	14	0.00767611	0.0201446	0.709826	-0.0318072	0.0471594	1.00771	0.968693	1.04829
ebi-a-GCST90001497	gen_samplesize_1finngen_R9_O15_PRE_OR_ECLAMPSIA	outcome	|| id:ebi-a-GCST90001497	Weighted median	14	0.00262038	0.0209077	0.900262	-0.0383587	0.0435995	1.00262	0.962368	1.04456
ebi-a-GCST90001497	gen_samplesize_1finngen_R9_O15_PRE_OR_ECLAMPSIA	outcome	|| id:ebi-a-GCST90001497	Weighted mode	14	-0.0015975	0.0165879	0.924747	-0.0341097	0.0309147	0.998404	0.966465	1.0314
ebi-a-GCST90001498	gen_samplesize_1finngen_R9_O15_PRE_OR_ECLAMPSIA	outcome	|| id:ebi-a-GCST90001498	Inverse variance weighted	15	-0.018403	0.0336282	0.584206	-0.0843143	0.0475082	0.981765	0.919142	1.04865
ebi-a-GCST90001498	gen_samplesize_1finngen_R9_O15_PRE_OR_ECLAMPSIA	outcome	|| id:ebi-a-GCST90001498	MR Egger	15	0.0748923	0.0723353	0.319382	-0.0668849	0.21667	1.07777	0.935303	1.24193
ebi-a-GCST90001498	gen_samplesize_1finngen_R9_O15_PRE_OR_ECLAMPSIA	outcome	|| id:ebi-a-GCST90001498	Weighted median	15	-0.0282176	0.0474373	0.55195	-0.121195	0.0647594	0.972177	0.885861	1.0669
ebi-a-GCST90001498	gen_samplesize_1finngen_R9_O15_PRE_OR_ECLAMPSIA	outcome	|| id:ebi-a-GCST90001498	Weighted mode	15	-0.0422657	0.0618792	0.50573	-0.163549	0.0790174	0.958615	0.849125	1.08222
ebi-a-GCST90001499	gen_samplesize_1finngen_R9_O15_PRE_OR_ECLAMPSIA	outcome	|| id:ebi-a-GCST90001499	Inverse variance weighted (multiplicative random effects)	14	0.0154138	0.0236301	0.514212	-0.0309013	0.0617288	1.01553	0.969571	1.06367
ebi-a-GCST90001499	gen_samplesize_1finngen_R9_O15_PRE_OR_ECLAMPSIA	outcome	|| id:ebi-a-GCST90001499	MR Egger	14	0.00522236	0.0306574	0.867576	-0.0548661	0.0653108	1.00524	0.946612	1.06749
ebi-a-GCST90001499	gen_samplesize_1finngen_R9_O15_PRE_OR_ECLAMPSIA	outcome	|| id:ebi-a-GCST90001499	Weighted median	14	0.000631743	0.0176396	0.971431	-0.0339419	0.0352053	1.00063	0.966628	1.03583
ebi-a-GCST90001499	gen_samplesize_1finngen_R9_O15_PRE_OR_ECLAMPSIA	outcome	|| id:ebi-a-GCST90001499	Weighted mode	14	-0.00195812	0.0186789	0.91811	-0.0385687	0.0346524	0.998044	0.962166	1.03526
ebi-a-GCST90001500	gen_samplesize_1finngen_R9_O15_PRE_OR_ECLAMPSIA	outcome	|| id:ebi-a-GCST90001500	Inverse variance weighted	18	-0.00106689	0.0218156	0.960995	-0.0438255	0.0416917	0.998934	0.957121	1.04257
ebi-a-GCST90001500	gen_samplesize_1finngen_R9_O15_PRE_OR_ECLAMPSIA	outcome	|| id:ebi-a-GCST90001500	MR Egger	18	-0.00165245	0.0316387	0.958993	-0.0636643	0.0603594	0.998349	0.93832	1.06222
ebi-a-GCST90001500	gen_samplesize_1finngen_R9_O15_PRE_OR_ECLAMPSIA	outcome	|| id:ebi-a-GCST90001500	Weighted median	18	0.0128338	0.0289248	0.657264	-0.0438589	0.0695264	1.01292	0.957089	1.072
ebi-a-GCST90001500	gen_samplesize_1finngen_R9_O15_PRE_OR_ECLAMPSIA	outcome	|| id:ebi-a-GCST90001500	Weighted mode	18	0.0148489	0.0303951	0.631417	-0.0447254	0.0744232	1.01496	0.95626	1.07726
ebi-a-GCST90001501	gen_samplesize_1finngen_R9_O15_PRE_OR_ECLAMPSIA	outcome	|| id:ebi-a-GCST90001501	Inverse variance weighted	14	0.00593519	0.0158017	0.70721	-0.0250361	0.0369064	1.00595	0.975275	1.0376
ebi-a-GCST90001501	gen_samplesize_1finngen_R9_O15_PRE_OR_ECLAMPSIA	outcome	|| id:ebi-a-GCST90001501	MR Egger	14	0.00111805	0.0229611	0.961965	-0.0438857	0.0461218	1.00112	0.957063	1.0472
ebi-a-GCST90001501	gen_samplesize_1finngen_R9_O15_PRE_OR_ECLAMPSIA	outcome	|| id:ebi-a-GCST90001501	Weighted median	14	-0.000621017	0.0175192	0.971723	-0.0349587	0.0337166	0.999379	0.965645	1.03429
ebi-a-GCST90001501	gen_samplesize_1finngen_R9_O15_PRE_OR_ECLAMPSIA	outcome	|| id:ebi-a-GCST90001501	Weighted mode	14	0.00288331	0.0150836	0.851357	-0.0266806	0.0324472	1.00289	0.973672	1.03298
ebi-a-GCST90001502	gen_samplesize_1finngen_R9_O15_PRE_OR_ECLAMPSIA	outcome	|| id:ebi-a-GCST90001502	Inverse variance weighted (multiplicative random effects)	20	-0.00895038	0.0124876	0.473532	-0.033426	0.0155252	0.99109	0.967126	1.01565
ebi-a-GCST90001502	gen_samplesize_1finngen_R9_O15_PRE_OR_ECLAMPSIA	outcome	|| id:ebi-a-GCST90001502	MR Egger	20	-0.00811615	0.0158469	0.614766	-0.0391761	0.0229438	0.991917	0.961581	1.02321
ebi-a-GCST90001502	gen_samplesize_1finngen_R9_O15_PRE_OR_ECLAMPSIA	outcome	|| id:ebi-a-GCST90001502	Weighted median	20	-0.00752656	0.0127955	0.556386	-0.0326058	0.0175527	0.992502	0.96792	1.01771
ebi-a-GCST90001502	gen_samplesize_1finngen_R9_O15_PRE_OR_ECLAMPSIA	outcome	|| id:ebi-a-GCST90001502	Weighted mode	20	-0.00756571	0.010984	0.499279	-0.0290944	0.013963	0.992463	0.971325	1.01406
ebi-a-GCST90001503	gen_samplesize_1finngen_R9_O15_PRE_OR_ECLAMPSIA	outcome	|| id:ebi-a-GCST90001503	Inverse variance weighted	19	0.00539126	0.0093817	0.565523	-0.0129969	0.0237794	1.00541	0.987087	1.02406
ebi-a-GCST90001503	gen_samplesize_1finngen_R9_O15_PRE_OR_ECLAMPSIA	outcome	|| id:ebi-a-GCST90001503	MR Egger	19	0.00648868	0.0113719	0.575742	-0.0158002	0.0287775	1.00651	0.984324	1.0292
ebi-a-GCST90001503	gen_samplesize_1finngen_R9_O15_PRE_OR_ECLAMPSIA	outcome	|| id:ebi-a-GCST90001503	Weighted median	19	0.00387577	0.0118537	0.743693	-0.0193575	0.027109	1.00388	0.980829	1.02748
ebi-a-GCST90001503	gen_samplesize_1finngen_R9_O15_PRE_OR_ECLAMPSIA	outcome	|| id:ebi-a-GCST90001503	Weighted mode	19	0.00769273	0.00977683	0.441617	-0.0114699	0.0268553	1.00772	0.988596	1.02722
ebi-a-GCST90001504	gen_samplesize_1finngen_R9_O15_PRE_OR_ECLAMPSIA	outcome	|| id:ebi-a-GCST90001504	Inverse variance weighted	12	-0.0305925	0.0277277	0.269889	-0.0849389	0.0237538	0.969871	0.918568	1.02404
ebi-a-GCST90001504	gen_samplesize_1finngen_R9_O15_PRE_OR_ECLAMPSIA	outcome	|| id:ebi-a-GCST90001504	MR Egger	12	-0.0432369	0.046119	0.370587	-0.13363	0.0471563	0.957684	0.874914	1.04829
ebi-a-GCST90001504	gen_samplesize_1finngen_R9_O15_PRE_OR_ECLAMPSIA	outcome	|| id:ebi-a-GCST90001504	Weighted median	12	-0.05515	0.0393584	0.161146	-0.132292	0.0219924	0.946343	0.876085	1.02224
ebi-a-GCST90001504	gen_samplesize_1finngen_R9_O15_PRE_OR_ECLAMPSIA	outcome	|| id:ebi-a-GCST90001504	Weighted mode	12	-0.0545459	0.036683	0.165119	-0.126445	0.0173528	0.946915	0.881223	1.0175
ebi-a-GCST90001505	gen_samplesize_1finngen_R9_O15_PRE_OR_ECLAMPSIA	outcome	|| id:ebi-a-GCST90001505	Inverse variance weighted	14	-0.0267423	0.027156	0.324738	-0.079968	0.0264834	0.973612	0.923146	1.02684
ebi-a-GCST90001505	gen_samplesize_1finngen_R9_O15_PRE_OR_ECLAMPSIA	outcome	|| id:ebi-a-GCST90001505	MR Egger	14	-0.0281865	0.0410968	0.505839	-0.108736	0.0523632	0.972207	0.896967	1.05376
ebi-a-GCST90001505	gen_samplesize_1finngen_R9_O15_PRE_OR_ECLAMPSIA	outcome	|| id:ebi-a-GCST90001505	Weighted median	14	-0.0370036	0.036372	0.30898	-0.108293	0.0342855	0.963673	0.897365	1.03488
ebi-a-GCST90001505	gen_samplesize_1finngen_R9_O15_PRE_OR_ECLAMPSIA	outcome	|| id:ebi-a-GCST90001505	Weighted mode	14	-0.0394794	0.0322236	0.242246	-0.102638	0.0236789	0.96129	0.902454	1.02396
ebi-a-GCST90001506	gen_samplesize_1finngen_R9_O15_PRE_OR_ECLAMPSIA	outcome	|| id:ebi-a-GCST90001506	Inverse variance weighted	11	-0.0462339	0.0292016	0.11336	-0.103469	0.0110011	0.954819	0.901704	1.01106
ebi-a-GCST90001506	gen_samplesize_1finngen_R9_O15_PRE_OR_ECLAMPSIA	outcome	|| id:ebi-a-GCST90001506	MR Egger	11	-0.0506746	0.0426387	0.265064	-0.134246	0.0328973	0.950588	0.874375	1.03344
ebi-a-GCST90001506	gen_samplesize_1finngen_R9_O15_PRE_OR_ECLAMPSIA	outcome	|| id:ebi-a-GCST90001506	Weighted median	11	-0.0521988	0.0388306	0.178861	-0.128307	0.0239091	0.94914	0.879584	1.0242
ebi-a-GCST90001506	gen_samplesize_1finngen_R9_O15_PRE_OR_ECLAMPSIA	outcome	|| id:ebi-a-GCST90001506	Weighted mode	11	-0.0527544	0.0356884	0.170148	-0.122704	0.0171949	0.948613	0.884526	1.01734
ebi-a-GCST90001507	gen_samplesize_1finngen_R9_O15_PRE_OR_ECLAMPSIA	outcome	|| id:ebi-a-GCST90001507	Inverse variance weighted	17	0.00371379	0.0208819	0.858843	-0.0372148	0.0446423	1.00372	0.963469	1.04565
ebi-a-GCST90001507	gen_samplesize_1finngen_R9_O15_PRE_OR_ECLAMPSIA	outcome	|| id:ebi-a-GCST90001507	MR Egger	17	-0.00964194	0.0311861	0.761442	-0.0707667	0.0514828	0.990404	0.931679	1.05283
ebi-a-GCST90001507	gen_samplesize_1finngen_R9_O15_PRE_OR_ECLAMPSIA	outcome	|| id:ebi-a-GCST90001507	Weighted median	17	0.0068316	0.0277533	0.805563	-0.0475649	0.0612281	1.00685	0.953549	1.06314
ebi-a-GCST90001507	gen_samplesize_1finngen_R9_O15_PRE_OR_ECLAMPSIA	outcome	|| id:ebi-a-GCST90001507	Weighted mode	17	0.00566748	0.031781	0.860703	-0.0566233	0.0679582	1.00568	0.94495	1.07032
ebi-a-GCST90001508	gen_samplesize_1finngen_R9_O15_PRE_OR_ECLAMPSIA	outcome	|| id:ebi-a-GCST90001508	Inverse variance weighted	17	-0.0157982	0.011	0.150947	-0.0373583	0.00576186	0.984326	0.963331	1.00578
ebi-a-GCST90001508	gen_samplesize_1finngen_R9_O15_PRE_OR_ECLAMPSIA	outcome	|| id:ebi-a-GCST90001508	MR Egger	17	-0.0103977	0.0137997	0.462828	-0.0374451	0.0166497	0.989656	0.963247	1.01679
ebi-a-GCST90001508	gen_samplesize_1finngen_R9_O15_PRE_OR_ECLAMPSIA	outcome	|| id:ebi-a-GCST90001508	Weighted median	17	-0.01481	0.0152532	0.331575	-0.0447062	0.0150862	0.985299	0.956278	1.0152
ebi-a-GCST90001508	gen_samplesize_1finngen_R9_O15_PRE_OR_ECLAMPSIA	outcome	|| id:ebi-a-GCST90001508	Weighted mode	17	-0.0103708	0.0153001	0.507566	-0.0403589	0.0196173	0.989683	0.960445	1.01981
ebi-a-GCST90001509	gen_samplesize_1finngen_R9_O15_PRE_OR_ECLAMPSIA	outcome	|| id:ebi-a-GCST90001509	Inverse variance weighted	17	-0.0167405	0.0151888	0.270393	-0.0465106	0.0130296	0.983399	0.954554	1.01311
ebi-a-GCST90001509	gen_samplesize_1finngen_R9_O15_PRE_OR_ECLAMPSIA	outcome	|| id:ebi-a-GCST90001509	MR Egger	17	-0.0303612	0.0189905	0.130722	-0.0675825	0.00686015	0.970095	0.934651	1.00688
ebi-a-GCST90001509	gen_samplesize_1finngen_R9_O15_PRE_OR_ECLAMPSIA	outcome	|| id:ebi-a-GCST90001509	Weighted median	17	-0.0308863	0.0190316	0.104612	-0.0681883	0.00641568	0.969586	0.934085	1.00644
ebi-a-GCST90001509	gen_samplesize_1finngen_R9_O15_PRE_OR_ECLAMPSIA	outcome	|| id:ebi-a-GCST90001509	Weighted mode	17	-0.0291399	0.0177371	0.119913	-0.0639046	0.00562485	0.971281	0.938094	1.00564
ebi-a-GCST90001510	gen_samplesize_1finngen_R9_O15_PRE_OR_ECLAMPSIA	outcome	|| id:ebi-a-GCST90001510	Inverse variance weighted	16	0.0220519	0.0112551	0.0500806	-8.16374e-06	0.044112	1.0223	0.999992	1.0451
ebi-a-GCST90001510	gen_samplesize_1finngen_R9_O15_PRE_OR_ECLAMPSIA	outcome	|| id:ebi-a-GCST90001510	MR Egger	16	0.0129956	0.018725	0.499022	-0.0237055	0.0496967	1.01308	0.976573	1.05095
ebi-a-GCST90001510	gen_samplesize_1finngen_R9_O15_PRE_OR_ECLAMPSIA	outcome	|| id:ebi-a-GCST90001510	Weighted median	16	0.0219408	0.0146342	0.133802	-0.00674232	0.0506238	1.02218	0.99328	1.05193
ebi-a-GCST90001510	gen_samplesize_1finngen_R9_O15_PRE_OR_ECLAMPSIA	outcome	|| id:ebi-a-GCST90001510	Weighted mode	16	0.0179506	0.0123474	0.166606	-0.00625035	0.0421515	1.01811	0.993769	1.04305
ebi-a-GCST90001511	gen_samplesize_1finngen_R9_O15_PRE_OR_ECLAMPSIA	outcome	|| id:ebi-a-GCST90001511	Inverse variance weighted	16	0.0163185	0.0164778	0.322013	-0.015978	0.048615	1.01645	0.984149	1.04982
ebi-a-GCST90001511	gen_samplesize_1finngen_R9_O15_PRE_OR_ECLAMPSIA	outcome	|| id:ebi-a-GCST90001511	MR Egger	16	0.0105702	0.0204938	0.614061	-0.0295978	0.0507381	1.01063	0.970836	1.05205
ebi-a-GCST90001511	gen_samplesize_1finngen_R9_O15_PRE_OR_ECLAMPSIA	outcome	|| id:ebi-a-GCST90001511	Weighted median	16	0.0172036	0.0167676	0.30489	-0.0156608	0.050068	1.01735	0.984461	1.05134
ebi-a-GCST90001511	gen_samplesize_1finngen_R9_O15_PRE_OR_ECLAMPSIA	outcome	|| id:ebi-a-GCST90001511	Weighted mode	16	0.0120392	0.0149796	0.43412	-0.0173209	0.0413993	1.01211	0.982828	1.04227
ebi-a-GCST90001512	gen_samplesize_1finngen_R9_O15_PRE_OR_ECLAMPSIA	outcome	|| id:ebi-a-GCST90001512	Inverse variance weighted	14	0.0231889	0.0137364	0.0913845	-0.00373438	0.0501122	1.02346	0.996273	1.05139
ebi-a-GCST90001512	gen_samplesize_1finngen_R9_O15_PRE_OR_ECLAMPSIA	outcome	|| id:ebi-a-GCST90001512	MR Egger	14	0.0197063	0.0173165	0.277329	-0.0142341	0.0536467	1.0199	0.985867	1.05511
ebi-a-GCST90001512	gen_samplesize_1finngen_R9_O15_PRE_OR_ECLAMPSIA	outcome	|| id:ebi-a-GCST90001512	Weighted median	14	0.0239103	0.0185323	0.196982	-0.012413	0.0602336	1.0242	0.987664	1.06208
ebi-a-GCST90001512	gen_samplesize_1finngen_R9_O15_PRE_OR_ECLAMPSIA	outcome	|| id:ebi-a-GCST90001512	Weighted mode	14	0.0163091	0.0145154	0.281516	-0.0121411	0.0447593	1.01644	0.987932	1.04578
ebi-a-GCST90001513	gen_samplesize_1finngen_R9_O15_PRE_OR_ECLAMPSIA	outcome	|| id:ebi-a-GCST90001513	Inverse variance weighted	13	-0.0132564	0.0351945	0.706426	-0.0822376	0.0557248	0.986831	0.921053	1.05731
ebi-a-GCST90001513	gen_samplesize_1finngen_R9_O15_PRE_OR_ECLAMPSIA	outcome	|| id:ebi-a-GCST90001513	MR Egger	13	-0.0598761	0.0561641	0.309223	-0.169958	0.0502055	0.941881	0.843701	1.05149
ebi-a-GCST90001513	gen_samplesize_1finngen_R9_O15_PRE_OR_ECLAMPSIA	outcome	|| id:ebi-a-GCST90001513	Weighted median	13	-0.0415268	0.0364362	0.254406	-0.112942	0.0298882	0.959324	0.893203	1.03034
ebi-a-GCST90001513	gen_samplesize_1finngen_R9_O15_PRE_OR_ECLAMPSIA	outcome	|| id:ebi-a-GCST90001513	Weighted mode	13	-0.0542215	0.036137	0.159345	-0.12505	0.0166071	0.947222	0.882453	1.01675
ebi-a-GCST90001514	gen_samplesize_1finngen_R9_O15_PRE_OR_ECLAMPSIA	outcome	|| id:ebi-a-GCST90001514	Inverse variance weighted	11	0.0124607	0.0201462	0.536238	-0.0270259	0.0519473	1.01254	0.973336	1.05332
ebi-a-GCST90001514	gen_samplesize_1finngen_R9_O15_PRE_OR_ECLAMPSIA	outcome	|| id:ebi-a-GCST90001514	MR Egger	11	0.0108082	0.0284272	0.71261	-0.0449092	0.0665255	1.01087	0.956084	1.06879
ebi-a-GCST90001514	gen_samplesize_1finngen_R9_O15_PRE_OR_ECLAMPSIA	outcome	|| id:ebi-a-GCST90001514	Weighted median	11	-0.0114309	0.0266231	0.667662	-0.0636122	0.0407505	0.988634	0.938369	1.04159
ebi-a-GCST90001514	gen_samplesize_1finngen_R9_O15_PRE_OR_ECLAMPSIA	outcome	|| id:ebi-a-GCST90001514	Weighted mode	11	-0.0112179	0.0286557	0.703661	-0.0673831	0.0449473	0.988845	0.934837	1.04597
ebi-a-GCST90001515	gen_samplesize_1finngen_R9_O15_PRE_OR_ECLAMPSIA	outcome	|| id:ebi-a-GCST90001515	Inverse variance weighted	10	-0.0154489	0.0261533	0.554716	-0.0667094	0.0358115	0.98467	0.935467	1.03646
ebi-a-GCST90001515	gen_samplesize_1finngen_R9_O15_PRE_OR_ECLAMPSIA	outcome	|| id:ebi-a-GCST90001515	MR Egger	10	0.100985	0.0685848	0.179127	-0.0334414	0.235411	1.10626	0.967112	1.26543
ebi-a-GCST90001515	gen_samplesize_1finngen_R9_O15_PRE_OR_ECLAMPSIA	outcome	|| id:ebi-a-GCST90001515	Weighted median	10	-0.0145873	0.0348277	0.675331	-0.0828496	0.053675	0.985519	0.92049	1.05514
ebi-a-GCST90001515	gen_samplesize_1finngen_R9_O15_PRE_OR_ECLAMPSIA	outcome	|| id:ebi-a-GCST90001515	Weighted mode	10	-0.00905496	0.0416364	0.832687	-0.0906622	0.0725523	0.990986	0.913326	1.07525
ebi-a-GCST90001516	gen_samplesize_1finngen_R9_O15_PRE_OR_ECLAMPSIA	outcome	|| id:ebi-a-GCST90001516	Inverse variance weighted	9	-0.00291163	0.0316374	0.926673	-0.0649209	0.0590976	0.997093	0.937142	1.06088
ebi-a-GCST90001516	gen_samplesize_1finngen_R9_O15_PRE_OR_ECLAMPSIA	outcome	|| id:ebi-a-GCST90001516	MR Egger	9	0.0222847	0.0684315	0.754207	-0.111841	0.15641	1.02253	0.894186	1.16931
ebi-a-GCST90001516	gen_samplesize_1finngen_R9_O15_PRE_OR_ECLAMPSIA	outcome	|| id:ebi-a-GCST90001516	Weighted median	9	-0.0115765	0.0410602	0.77799	-0.0920544	0.0689015	0.98849	0.912056	1.07133
ebi-a-GCST90001516	gen_samplesize_1finngen_R9_O15_PRE_OR_ECLAMPSIA	outcome	|| id:ebi-a-GCST90001516	Weighted mode	9	0.0430557	0.0555549	0.460625	-0.065832	0.151943	1.044	0.936288	1.16409
ebi-a-GCST90001517	gen_samplesize_1finngen_R9_O15_PRE_OR_ECLAMPSIA	outcome	|| id:ebi-a-GCST90001517	Inverse variance weighted	19	-0.0317775	0.0108732	0.00347169	-0.0530889	-0.0104661	0.968722	0.948296	0.989589
ebi-a-GCST90001517	gen_samplesize_1finngen_R9_O15_PRE_OR_ECLAMPSIA	outcome	|| id:ebi-a-GCST90001517	MR Egger	19	-0.0366819	0.0130722	0.0121484	-0.0623035	-0.0110604	0.963983	0.939598	0.989001
ebi-a-GCST90001517	gen_samplesize_1finngen_R9_O15_PRE_OR_ECLAMPSIA	outcome	|| id:ebi-a-GCST90001517	Weighted median	19	-0.0308517	0.0150619	0.0405278	-0.0603731	-0.00133039	0.969619	0.941413	0.99867
ebi-a-GCST90001517	gen_samplesize_1finngen_R9_O15_PRE_OR_ECLAMPSIA	outcome	|| id:ebi-a-GCST90001517	Weighted mode	19	-0.0321619	0.0131728	0.0251792	-0.0579805	-0.00634328	0.96835	0.943668	0.993677
ebi-a-GCST90001518	gen_samplesize_1finngen_R9_O15_PRE_OR_ECLAMPSIA	outcome	|| id:ebi-a-GCST90001518	Inverse variance weighted	18	-0.0385634	0.00976239	7.80866e-05	-0.0576977	-0.0194291	0.962171	0.943935	0.980758
ebi-a-GCST90001518	gen_samplesize_1finngen_R9_O15_PRE_OR_ECLAMPSIA	outcome	|| id:ebi-a-GCST90001518	MR Egger	18	-0.0322653	0.0114944	0.0126563	-0.0547944	-0.00973622	0.96825	0.94668	0.990311
ebi-a-GCST90001518	gen_samplesize_1finngen_R9_O15_PRE_OR_ECLAMPSIA	outcome	|| id:ebi-a-GCST90001518	Weighted median	18	-0.0321779	0.0133643	0.0160512	-0.058372	-0.00598386	0.968334	0.943299	0.994034
ebi-a-GCST90001518	gen_samplesize_1finngen_R9_O15_PRE_OR_ECLAMPSIA	outcome	|| id:ebi-a-GCST90001518	Weighted mode	18	-0.0335277	0.0113709	0.00898703	-0.0558147	-0.0112407	0.967028	0.945714	0.988822
ebi-a-GCST90001519	gen_samplesize_1finngen_R9_O15_PRE_OR_ECLAMPSIA	outcome	|| id:ebi-a-GCST90001519	Inverse variance weighted	10	-0.00926349	0.0204476	0.650523	-0.0493408	0.0308138	0.990779	0.951857	1.03129
ebi-a-GCST90001519	gen_samplesize_1finngen_R9_O15_PRE_OR_ECLAMPSIA	outcome	|| id:ebi-a-GCST90001519	MR Egger	10	0.0378267	0.0338659	0.296433	-0.0285504	0.104204	1.03855	0.971853	1.10983
ebi-a-GCST90001519	gen_samplesize_1finngen_R9_O15_PRE_OR_ECLAMPSIA	outcome	|| id:ebi-a-GCST90001519	Weighted median	10	0.0182255	0.0269031	0.49812	-0.0345045	0.0709556	1.01839	0.966084	1.07353
ebi-a-GCST90001519	gen_samplesize_1finngen_R9_O15_PRE_OR_ECLAMPSIA	outcome	|| id:ebi-a-GCST90001519	Weighted mode	10	0.017579	0.0298705	0.570665	-0.0409673	0.0761252	1.01773	0.959861	1.0791
ebi-a-GCST90001520	gen_samplesize_1finngen_R9_O15_PRE_OR_ECLAMPSIA	outcome	|| id:ebi-a-GCST90001520	Inverse variance weighted	14	-0.0419518	0.0138248	0.00240901	-0.0690484	-0.0148553	0.958916	0.933282	0.985255
ebi-a-GCST90001520	gen_samplesize_1finngen_R9_O15_PRE_OR_ECLAMPSIA	outcome	|| id:ebi-a-GCST90001520	MR Egger	14	-0.0481824	0.0177599	0.018851	-0.0829919	-0.013373	0.95296	0.920359	0.986716
ebi-a-GCST90001520	gen_samplesize_1finngen_R9_O15_PRE_OR_ECLAMPSIA	outcome	|| id:ebi-a-GCST90001520	Weighted median	14	-0.0447842	0.019331	0.0205201	-0.082673	-0.00689537	0.956204	0.920652	0.993128
ebi-a-GCST90001520	gen_samplesize_1finngen_R9_O15_PRE_OR_ECLAMPSIA	outcome	|| id:ebi-a-GCST90001520	Weighted mode	14	-0.0413022	0.0176256	0.035668	-0.0758483	-0.00675606	0.959539	0.926957	0.993267
ebi-a-GCST90001521	gen_samplesize_1finngen_R9_O15_PRE_OR_ECLAMPSIA	outcome	|| id:ebi-a-GCST90001521	Inverse variance weighted (multiplicative random effects)	14	-0.0366305	0.032865	0.265034	-0.101046	0.027785	0.964032	0.903892	1.02817
ebi-a-GCST90001521	gen_samplesize_1finngen_R9_O15_PRE_OR_ECLAMPSIA	outcome	|| id:ebi-a-GCST90001521	MR Egger	14	-0.0209542	0.0503349	0.684542	-0.119611	0.0777022	0.979264	0.887266	1.0808
ebi-a-GCST90001521	gen_samplesize_1finngen_R9_O15_PRE_OR_ECLAMPSIA	outcome	|| id:ebi-a-GCST90001521	Weighted median	14	-0.0276313	0.030449	0.364163	-0.0873113	0.0320487	0.972747	0.916392	1.03257
ebi-a-GCST90001521	gen_samplesize_1finngen_R9_O15_PRE_OR_ECLAMPSIA	outcome	|| id:ebi-a-GCST90001521	Weighted mode	14	-0.013929	0.0302315	0.652594	-0.0731828	0.0453247	0.986168	0.929431	1.04637
ebi-a-GCST90001522	gen_samplesize_1finngen_R9_O15_PRE_OR_ECLAMPSIA	outcome	|| id:ebi-a-GCST90001522	Inverse variance weighted	11	-0.00857815	0.030701	0.779931	-0.0687522	0.0515959	0.991459	0.933558	1.05295
ebi-a-GCST90001522	gen_samplesize_1finngen_R9_O15_PRE_OR_ECLAMPSIA	outcome	|| id:ebi-a-GCST90001522	MR Egger	11	-0.0191663	0.0582417	0.749622	-0.13332	0.0949874	0.981016	0.875185	1.09965
ebi-a-GCST90001522	gen_samplesize_1finngen_R9_O15_PRE_OR_ECLAMPSIA	outcome	|| id:ebi-a-GCST90001522	Weighted median	11	0.0334535	0.0368325	0.36374	-0.0387381	0.105645	1.03402	0.962003	1.11143
ebi-a-GCST90001522	gen_samplesize_1finngen_R9_O15_PRE_OR_ECLAMPSIA	outcome	|| id:ebi-a-GCST90001522	Weighted mode	11	0.0401558	0.0408894	0.349234	-0.0399875	0.120299	1.04097	0.960801	1.12783
ebi-a-GCST90001523	gen_samplesize_1finngen_R9_O15_PRE_OR_ECLAMPSIA	outcome	|| id:ebi-a-GCST90001523	Inverse variance weighted	18	-0.0294344	0.0163386	0.0716211	-0.0614581	0.00258936	0.970995	0.940392	1.00259
ebi-a-GCST90001523	gen_samplesize_1finngen_R9_O15_PRE_OR_ECLAMPSIA	outcome	|| id:ebi-a-GCST90001523	MR Egger	18	-0.0365318	0.0230259	0.132178	-0.0816626	0.00859907	0.964127	0.921583	1.00864
ebi-a-GCST90001523	gen_samplesize_1finngen_R9_O15_PRE_OR_ECLAMPSIA	outcome	|| id:ebi-a-GCST90001523	Weighted median	18	-0.0362505	0.0225583	0.10806	-0.0804647	0.00796369	0.964399	0.922687	1.008
ebi-a-GCST90001523	gen_samplesize_1finngen_R9_O15_PRE_OR_ECLAMPSIA	outcome	|| id:ebi-a-GCST90001523	Weighted mode	18	-0.0292182	0.0220152	0.201999	-0.072368	0.0139317	0.971205	0.930188	1.01403
ebi-a-GCST90001524	gen_samplesize_1finngen_R9_O15_PRE_OR_ECLAMPSIA	outcome	|| id:ebi-a-GCST90001524	Inverse variance weighted	11	0.0236601	0.0335797	0.481061	-0.0421561	0.0894763	1.02394	0.95872	1.0936
ebi-a-GCST90001524	gen_samplesize_1finngen_R9_O15_PRE_OR_ECLAMPSIA	outcome	|| id:ebi-a-GCST90001524	MR Egger	11	0.138752	0.0523156	0.0263807	0.0362131	0.24129	1.14884	1.03688	1.27289
ebi-a-GCST90001524	gen_samplesize_1finngen_R9_O15_PRE_OR_ECLAMPSIA	outcome	|| id:ebi-a-GCST90001524	Weighted median	11	0.0498146	0.0441008	0.258661	-0.036623	0.136252	1.05108	0.964039	1.14597
ebi-a-GCST90001524	gen_samplesize_1finngen_R9_O15_PRE_OR_ECLAMPSIA	outcome	|| id:ebi-a-GCST90001524	Weighted mode	11	0.0764229	0.055601	0.199307	-0.032555	0.185401	1.07942	0.967969	1.2037
ebi-a-GCST90001525	gen_samplesize_1finngen_R9_O15_PRE_OR_ECLAMPSIA	outcome	|| id:ebi-a-GCST90001525	Inverse variance weighted	20	-0.00691334	0.0198581	0.727737	-0.0458351	0.0320085	0.993111	0.955199	1.03253
ebi-a-GCST90001525	gen_samplesize_1finngen_R9_O15_PRE_OR_ECLAMPSIA	outcome	|| id:ebi-a-GCST90001525	MR Egger	20	0.00037458	0.0359738	0.991807	-0.070134	0.0708831	1.00037	0.932269	1.07346
ebi-a-GCST90001525	gen_samplesize_1finngen_R9_O15_PRE_OR_ECLAMPSIA	outcome	|| id:ebi-a-GCST90001525	Weighted median	20	-0.00438903	0.0265728	0.86881	-0.0564718	0.0476937	0.995621	0.945093	1.04885
ebi-a-GCST90001525	gen_samplesize_1finngen_R9_O15_PRE_OR_ECLAMPSIA	outcome	|| id:ebi-a-GCST90001525	Weighted mode	20	-0.0144747	0.0280184	0.611386	-0.0693909	0.0404414	0.98563	0.932962	1.04127
ebi-a-GCST90001526	gen_samplesize_1finngen_R9_O15_PRE_OR_ECLAMPSIA	outcome	|| id:ebi-a-GCST90001526	Inverse variance weighted	13	0.0324019	0.0189872	0.0879126	-0.00481299	0.0696167	1.03293	0.995199	1.0721
ebi-a-GCST90001526	gen_samplesize_1finngen_R9_O15_PRE_OR_ECLAMPSIA	outcome	|| id:ebi-a-GCST90001526	MR Egger	13	0.00544586	0.0378194	0.888107	-0.0686802	0.0795719	1.00546	0.933625	1.08282
ebi-a-GCST90001526	gen_samplesize_1finngen_R9_O15_PRE_OR_ECLAMPSIA	outcome	|| id:ebi-a-GCST90001526	Weighted median	13	0.0312867	0.0257576	0.224497	-0.0191982	0.0817716	1.03178	0.980985	1.08521
ebi-a-GCST90001526	gen_samplesize_1finngen_R9_O15_PRE_OR_ECLAMPSIA	outcome	|| id:ebi-a-GCST90001526	Weighted mode	13	0.0351916	0.0295938	0.257378	-0.0228123	0.0931954	1.03582	0.977446	1.09768
ebi-a-GCST90001527	gen_samplesize_1finngen_R9_O15_PRE_OR_ECLAMPSIA	outcome	|| id:ebi-a-GCST90001527	Inverse variance weighted	15	0.00568097	0.0184178	0.757739	-0.0304178	0.0417798	1.0057	0.97004	1.04266
ebi-a-GCST90001527	gen_samplesize_1finngen_R9_O15_PRE_OR_ECLAMPSIA	outcome	|| id:ebi-a-GCST90001527	MR Egger	15	0.00320603	0.0253801	0.901411	-0.0465389	0.052951	1.00321	0.954527	1.05438
ebi-a-GCST90001527	gen_samplesize_1finngen_R9_O15_PRE_OR_ECLAMPSIA	outcome	|| id:ebi-a-GCST90001527	Weighted median	15	-0.000220149	0.0258868	0.993215	-0.0509583	0.050518	0.99978	0.950318	1.05182
ebi-a-GCST90001527	gen_samplesize_1finngen_R9_O15_PRE_OR_ECLAMPSIA	outcome	|| id:ebi-a-GCST90001527	Weighted mode	15	0.00077874	0.023659	0.974207	-0.045593	0.0471505	1.00078	0.955431	1.04828
ebi-a-GCST90001528	gen_samplesize_1finngen_R9_O15_PRE_OR_ECLAMPSIA	outcome	|| id:ebi-a-GCST90001528	Inverse variance weighted	12	0.00759637	0.0122812	0.53622	-0.0164747	0.0316674	1.00763	0.98366	1.03217
ebi-a-GCST90001528	gen_samplesize_1finngen_R9_O15_PRE_OR_ECLAMPSIA	outcome	|| id:ebi-a-GCST90001528	MR Egger	12	0.0285588	0.0181473	0.146627	-0.00700983	0.0641275	1.02897	0.993015	1.06623
ebi-a-GCST90001528	gen_samplesize_1finngen_R9_O15_PRE_OR_ECLAMPSIA	outcome	|| id:ebi-a-GCST90001528	Weighted median	12	0.0211339	0.017001	0.21383	-0.012188	0.0544559	1.02136	0.987886	1.05597
ebi-a-GCST90001528	gen_samplesize_1finngen_R9_O15_PRE_OR_ECLAMPSIA	outcome	|| id:ebi-a-GCST90001528	Weighted mode	12	0.0261556	0.0163743	0.138492	-0.005938	0.0582493	1.0265	0.99408	1.05998
ebi-a-GCST90001529	gen_samplesize_1finngen_R9_O15_PRE_OR_ECLAMPSIA	outcome	|| id:ebi-a-GCST90001529	Inverse variance weighted	6	-0.0248129	0.0480286	0.605416	-0.118949	0.0693231	0.975492	0.887853	1.07178
ebi-a-GCST90001529	gen_samplesize_1finngen_R9_O15_PRE_OR_ECLAMPSIA	outcome	|| id:ebi-a-GCST90001529	MR Egger	6	0.0919549	0.0809054	0.319188	-0.0666198	0.25053	1.09632	0.935551	1.28471
ebi-a-GCST90001529	gen_samplesize_1finngen_R9_O15_PRE_OR_ECLAMPSIA	outcome	|| id:ebi-a-GCST90001529	Weighted median	6	-0.0309366	0.0555459	0.577558	-0.139807	0.0779334	0.969537	0.869526	1.08105
ebi-a-GCST90001529	gen_samplesize_1finngen_R9_O15_PRE_OR_ECLAMPSIA	outcome	|| id:ebi-a-GCST90001529	Weighted mode	6	-0.00601165	0.0787459	0.942107	-0.160354	0.14833	0.994006	0.851842	1.1599
ebi-a-GCST90001530	gen_samplesize_1finngen_R9_O15_PRE_OR_ECLAMPSIA	outcome	|| id:ebi-a-GCST90001530	Inverse variance weighted (multiplicative random effects)	15	-0.0284349	0.0246557	0.248795	-0.07676	0.0198902	0.971966	0.926112	1.02009
ebi-a-GCST90001530	gen_samplesize_1finngen_R9_O15_PRE_OR_ECLAMPSIA	outcome	|| id:ebi-a-GCST90001530	MR Egger	15	-0.0765594	0.0449598	0.112371	-0.164681	0.0115618	0.926298	0.848165	1.01163
ebi-a-GCST90001530	gen_samplesize_1finngen_R9_O15_PRE_OR_ECLAMPSIA	outcome	|| id:ebi-a-GCST90001530	Weighted median	15	-0.0615427	0.0248912	0.0134184	-0.11033	-0.0127559	0.940313	0.895539	0.987325
ebi-a-GCST90001530	gen_samplesize_1finngen_R9_O15_PRE_OR_ECLAMPSIA	outcome	|| id:ebi-a-GCST90001530	Weighted mode	15	-0.0571592	0.0229275	0.0258113	-0.102097	-0.0122213	0.944444	0.902942	0.987853
ebi-a-GCST90001531	gen_samplesize_1finngen_R9_O15_PRE_OR_ECLAMPSIA	outcome	|| id:ebi-a-GCST90001531	Inverse variance weighted	17	-0.00907658	0.00958814	0.343819	-0.0278693	0.00971618	0.990964	0.972515	1.00976
ebi-a-GCST90001531	gen_samplesize_1finngen_R9_O15_PRE_OR_ECLAMPSIA	outcome	|| id:ebi-a-GCST90001531	MR Egger	17	-0.011268	0.0119554	0.360869	-0.0347007	0.0121646	0.988795	0.965895	1.01224
ebi-a-GCST90001531	gen_samplesize_1finngen_R9_O15_PRE_OR_ECLAMPSIA	outcome	|| id:ebi-a-GCST90001531	Weighted median	17	-0.008937	0.0122471	0.46556	-0.0329414	0.0150674	0.991103	0.967595	1.01518
ebi-a-GCST90001531	gen_samplesize_1finngen_R9_O15_PRE_OR_ECLAMPSIA	outcome	|| id:ebi-a-GCST90001531	Weighted mode	17	-0.0111776	0.0110905	0.328525	-0.032915	0.0105598	0.988885	0.967621	1.01062
ebi-a-GCST90001532	gen_samplesize_1finngen_R9_O15_PRE_OR_ECLAMPSIA	outcome	|| id:ebi-a-GCST90001532	Inverse variance weighted	18	-0.0156108	0.00903877	0.0841514	-0.0333267	0.00210522	0.98451	0.967222	1.00211
ebi-a-GCST90001532	gen_samplesize_1finngen_R9_O15_PRE_OR_ECLAMPSIA	outcome	|| id:ebi-a-GCST90001532	MR Egger	18	-0.0207424	0.0110806	0.0796075	-0.0424603	0.000975497	0.979471	0.958429	1.00098
ebi-a-GCST90001532	gen_samplesize_1finngen_R9_O15_PRE_OR_ECLAMPSIA	outcome	|| id:ebi-a-GCST90001532	Weighted median	18	-0.0119772	0.0121619	0.324717	-0.0358146	0.0118602	0.988094	0.964819	1.01193
ebi-a-GCST90001532	gen_samplesize_1finngen_R9_O15_PRE_OR_ECLAMPSIA	outcome	|| id:ebi-a-GCST90001532	Weighted mode	18	-0.0176477	0.0105004	0.111108	-0.0382285	0.00293312	0.982507	0.962493	1.00294
ebi-a-GCST90001533	gen_samplesize_1finngen_R9_O15_PRE_OR_ECLAMPSIA	outcome	|| id:ebi-a-GCST90001533	Inverse variance weighted (multiplicative random effects)	11	-0.00224384	0.0297604	0.939899	-0.0605742	0.0560865	0.997759	0.941224	1.05769
ebi-a-GCST90001533	gen_samplesize_1finngen_R9_O15_PRE_OR_ECLAMPSIA	outcome	|| id:ebi-a-GCST90001533	MR Egger	11	-0.0184734	0.0637626	0.778593	-0.143448	0.106501	0.981696	0.866366	1.11238
ebi-a-GCST90001533	gen_samplesize_1finngen_R9_O15_PRE_OR_ECLAMPSIA	outcome	|| id:ebi-a-GCST90001533	Weighted median	11	-0.0343697	0.0281744	0.222508	-0.0895916	0.0208523	0.966214	0.914305	1.02107
ebi-a-GCST90001533	gen_samplesize_1finngen_R9_O15_PRE_OR_ECLAMPSIA	outcome	|| id:ebi-a-GCST90001533	Weighted mode	11	-0.0432935	0.0290755	0.167332	-0.100282	0.0136945	0.95763	0.904583	1.01379
ebi-a-GCST90001534	gen_samplesize_1finngen_R9_O15_PRE_OR_ECLAMPSIA	outcome	|| id:ebi-a-GCST90001534	Inverse variance weighted (multiplicative random effects)	10	0.0268417	0.0716689	0.708015	-0.113629	0.167313	1.02721	0.892589	1.18212
ebi-a-GCST90001534	gen_samplesize_1finngen_R9_O15_PRE_OR_ECLAMPSIA	outcome	|| id:ebi-a-GCST90001534	MR Egger	10	0.0291271	0.14289	0.843567	-0.250938	0.309192	1.02956	0.778071	1.36232
ebi-a-GCST90001534	gen_samplesize_1finngen_R9_O15_PRE_OR_ECLAMPSIA	outcome	|| id:ebi-a-GCST90001534	Weighted median	10	-0.0831255	0.066447	0.210933	-0.213362	0.0471106	0.920236	0.807864	1.04824
ebi-a-GCST90001534	gen_samplesize_1finngen_R9_O15_PRE_OR_ECLAMPSIA	outcome	|| id:ebi-a-GCST90001534	Weighted mode	10	-0.0705807	0.091328	0.459439	-0.249584	0.108422	0.931853	0.779125	1.11452
ebi-a-GCST90001535	gen_samplesize_1finngen_R9_O15_PRE_OR_ECLAMPSIA	outcome	|| id:ebi-a-GCST90001535	Inverse variance weighted (multiplicative random effects)	17	0.00883929	0.0292652	0.762621	-0.0485205	0.066199	1.00888	0.952638	1.06844
ebi-a-GCST90001535	gen_samplesize_1finngen_R9_O15_PRE_OR_ECLAMPSIA	outcome	|| id:ebi-a-GCST90001535	MR Egger	17	0.0182255	0.0422911	0.672632	-0.0646651	0.101116	1.01839	0.937381	1.1064
ebi-a-GCST90001535	gen_samplesize_1finngen_R9_O15_PRE_OR_ECLAMPSIA	outcome	|| id:ebi-a-GCST90001535	Weighted median	17	0.00439575	0.0299664	0.883377	-0.0543384	0.0631299	1.00441	0.947112	1.06517
ebi-a-GCST90001535	gen_samplesize_1finngen_R9_O15_PRE_OR_ECLAMPSIA	outcome	|| id:ebi-a-GCST90001535	Weighted mode	17	0.0109116	0.0284608	0.706476	-0.0448715	0.0666947	1.01097	0.95612	1.06897
ebi-a-GCST90001536	gen_samplesize_1finngen_R9_O15_PRE_OR_ECLAMPSIA	outcome	|| id:ebi-a-GCST90001536	Inverse variance weighted (multiplicative random effects)	18	-0.0086104	0.00999753	0.389099	-0.0282056	0.0109848	0.991427	0.972189	1.01105
ebi-a-GCST90001536	gen_samplesize_1finngen_R9_O15_PRE_OR_ECLAMPSIA	outcome	|| id:ebi-a-GCST90001536	MR Egger	18	-0.00385889	0.0115718	0.743107	-0.0265397	0.0188219	0.996149	0.973809	1.019
ebi-a-GCST90001536	gen_samplesize_1finngen_R9_O15_PRE_OR_ECLAMPSIA	outcome	|| id:ebi-a-GCST90001536	Weighted median	18	-0.00201224	0.0111112	0.856289	-0.0237902	0.0197657	0.99799	0.976491	1.01996
ebi-a-GCST90001536	gen_samplesize_1finngen_R9_O15_PRE_OR_ECLAMPSIA	outcome	|| id:ebi-a-GCST90001536	Weighted mode	18	-0.00612043	0.00848828	0.480682	-0.0227575	0.0105166	0.993898	0.9775	1.01057
ebi-a-GCST90001537	gen_samplesize_1finngen_R9_O15_PRE_OR_ECLAMPSIA	outcome	|| id:ebi-a-GCST90001537	Inverse variance weighted (multiplicative random effects)	14	0.0548722	0.0380511	0.149284	-0.019708	0.129452	1.05641	0.980485	1.1382
ebi-a-GCST90001537	gen_samplesize_1finngen_R9_O15_PRE_OR_ECLAMPSIA	outcome	|| id:ebi-a-GCST90001537	MR Egger	14	0.00890688	0.0467896	0.852209	-0.0828007	0.100614	1.00895	0.920535	1.10585
ebi-a-GCST90001537	gen_samplesize_1finngen_R9_O15_PRE_OR_ECLAMPSIA	outcome	|| id:ebi-a-GCST90001537	Weighted median	14	0.0293907	0.0306003	0.336818	-0.0305858	0.0893672	1.02983	0.969877	1.09348
ebi-a-GCST90001537	gen_samplesize_1finngen_R9_O15_PRE_OR_ECLAMPSIA	outcome	|| id:ebi-a-GCST90001537	Weighted mode	14	0.0209599	0.0297426	0.493424	-0.0373356	0.0792553	1.02118	0.963353	1.08248
ebi-a-GCST90001538	gen_samplesize_1finngen_R9_O15_PRE_OR_ECLAMPSIA	outcome	|| id:ebi-a-GCST90001538	Inverse variance weighted	21	-0.0248173	0.0221352	0.262217	-0.0682023	0.0185677	0.975488	0.934072	1.01874
ebi-a-GCST90001538	gen_samplesize_1finngen_R9_O15_PRE_OR_ECLAMPSIA	outcome	|| id:ebi-a-GCST90001538	MR Egger	21	-0.0179002	0.0377549	0.64082	-0.0918999	0.0560994	0.982259	0.912196	1.0577
ebi-a-GCST90001538	gen_samplesize_1finngen_R9_O15_PRE_OR_ECLAMPSIA	outcome	|| id:ebi-a-GCST90001538	Weighted median	21	-0.0312818	0.025096	0.212586	-0.0804698	0.0179063	0.969202	0.922683	1.01807
ebi-a-GCST90001538	gen_samplesize_1finngen_R9_O15_PRE_OR_ECLAMPSIA	outcome	|| id:ebi-a-GCST90001538	Weighted mode	21	-0.0229937	0.0269421	0.403518	-0.0758002	0.0298129	0.977269	0.927001	1.03026
ebi-a-GCST90001539	gen_samplesize_1finngen_R9_O15_PRE_OR_ECLAMPSIA	outcome	|| id:ebi-a-GCST90001539	Inverse variance weighted	11	0.0275372	0.044503	0.536066	-0.0596886	0.114763	1.02792	0.942058	1.12161
ebi-a-GCST90001539	gen_samplesize_1finngen_R9_O15_PRE_OR_ECLAMPSIA	outcome	|| id:ebi-a-GCST90001539	MR Egger	11	0.107148	0.12971	0.430121	-0.147082	0.361379	1.1131	0.863223	1.43531
ebi-a-GCST90001539	gen_samplesize_1finngen_R9_O15_PRE_OR_ECLAMPSIA	outcome	|| id:ebi-a-GCST90001539	Weighted median	11	0.0294981	0.0586898	0.615239	-0.0855339	0.14453	1.02994	0.918022	1.1555
ebi-a-GCST90001539	gen_samplesize_1finngen_R9_O15_PRE_OR_ECLAMPSIA	outcome	|| id:ebi-a-GCST90001539	Weighted mode	11	0.0205077	0.0825492	0.808829	-0.141289	0.182304	1.02072	0.868239	1.19998
ebi-a-GCST90001540	gen_samplesize_1finngen_R9_O15_PRE_OR_ECLAMPSIA	outcome	|| id:ebi-a-GCST90001540	Inverse variance weighted (multiplicative random effects)	11	0.073163	0.0640141	0.253072	-0.0523046	0.198631	1.07591	0.94904	1.21973
ebi-a-GCST90001540	gen_samplesize_1finngen_R9_O15_PRE_OR_ECLAMPSIA	outcome	|| id:ebi-a-GCST90001540	MR Egger	11	0.106935	0.219959	0.638473	-0.324185	0.538055	1.11286	0.723116	1.71267
ebi-a-GCST90001540	gen_samplesize_1finngen_R9_O15_PRE_OR_ECLAMPSIA	outcome	|| id:ebi-a-GCST90001540	Weighted median	11	0.0935877	0.059412	0.115203	-0.0228598	0.210035	1.09811	0.9774	1.23372
ebi-a-GCST90001540	gen_samplesize_1finngen_R9_O15_PRE_OR_ECLAMPSIA	outcome	|| id:ebi-a-GCST90001540	Weighted mode	11	0.145748	0.104673	0.193984	-0.0594117	0.350907	1.1569	0.942319	1.42036
ebi-a-GCST90001541	gen_samplesize_1finngen_R9_O15_PRE_OR_ECLAMPSIA	outcome	|| id:ebi-a-GCST90001541	Inverse variance weighted	23	-0.0114075	0.0269772	0.6724	-0.0642827	0.0414678	0.988657	0.93774	1.04234
ebi-a-GCST90001541	gen_samplesize_1finngen_R9_O15_PRE_OR_ECLAMPSIA	outcome	|| id:ebi-a-GCST90001541	MR Egger	23	-0.00364359	0.0459774	0.937586	-0.0937594	0.0864722	0.996363	0.910502	1.09032
ebi-a-GCST90001541	gen_samplesize_1finngen_R9_O15_PRE_OR_ECLAMPSIA	outcome	|| id:ebi-a-GCST90001541	Weighted median	23	-0.0114567	0.0356368	0.747844	-0.0813049	0.0583915	0.988609	0.921913	1.06013
ebi-a-GCST90001541	gen_samplesize_1finngen_R9_O15_PRE_OR_ECLAMPSIA	outcome	|| id:ebi-a-GCST90001541	Weighted mode	23	-0.00861607	0.0349132	0.807363	-0.077046	0.0598138	0.991421	0.925847	1.06164
ebi-a-GCST90001542	gen_samplesize_1finngen_R9_O15_PRE_OR_ECLAMPSIA	outcome	|| id:ebi-a-GCST90001542	Inverse variance weighted (multiplicative random effects)	10	-0.0109259	0.0191901	0.569117	-0.0485386	0.0266867	0.989134	0.952621	1.02705
ebi-a-GCST90001542	gen_samplesize_1finngen_R9_O15_PRE_OR_ECLAMPSIA	outcome	|| id:ebi-a-GCST90001542	MR Egger	10	0.00086528	0.024171	0.97232	-0.0465099	0.0482405	1.00087	0.954555	1.04942
ebi-a-GCST90001542	gen_samplesize_1finngen_R9_O15_PRE_OR_ECLAMPSIA	outcome	|| id:ebi-a-GCST90001542	Weighted median	10	-0.0113906	0.0155103	0.462711	-0.0417908	0.0190096	0.988674	0.95907	1.01919
ebi-a-GCST90001542	gen_samplesize_1finngen_R9_O15_PRE_OR_ECLAMPSIA	outcome	|| id:ebi-a-GCST90001542	Weighted mode	10	-0.0127245	0.0135122	0.370933	-0.0392085	0.0137595	0.987356	0.96155	1.01385
ebi-a-GCST90001543	gen_samplesize_1finngen_R9_O15_PRE_OR_ECLAMPSIA	outcome	|| id:ebi-a-GCST90001543	Inverse variance weighted (multiplicative random effects)	16	-0.0434561	0.0293367	0.13853	-0.100956	0.0140438	0.957475	0.903973	1.01414
ebi-a-GCST90001543	gen_samplesize_1finngen_R9_O15_PRE_OR_ECLAMPSIA	outcome	|| id:ebi-a-GCST90001543	MR Egger	16	-0.0351379	0.039358	0.387066	-0.11228	0.0420038	0.965472	0.893794	1.0429
ebi-a-GCST90001543	gen_samplesize_1finngen_R9_O15_PRE_OR_ECLAMPSIA	outcome	|| id:ebi-a-GCST90001543	Weighted median	16	-0.0304488	0.0289777	0.293365	-0.0872451	0.0263474	0.97001	0.916452	1.0267
ebi-a-GCST90001543	gen_samplesize_1finngen_R9_O15_PRE_OR_ECLAMPSIA	outcome	|| id:ebi-a-GCST90001543	Weighted mode	16	-0.0370316	0.0242279	0.147206	-0.0845182	0.010455	0.963646	0.918955	1.01051
ebi-a-GCST90001544	gen_samplesize_1finngen_R9_O15_PRE_OR_ECLAMPSIA	outcome	|| id:ebi-a-GCST90001544	Inverse variance weighted (multiplicative random effects)	16	-0.0120512	0.0305704	0.693424	-0.0719692	0.0478667	0.988021	0.93056	1.04903
ebi-a-GCST90001544	gen_samplesize_1finngen_R9_O15_PRE_OR_ECLAMPSIA	outcome	|| id:ebi-a-GCST90001544	MR Egger	16	0.0223586	0.048978	0.65503	-0.0736383	0.118355	1.02261	0.929008	1.12564
ebi-a-GCST90001544	gen_samplesize_1finngen_R9_O15_PRE_OR_ECLAMPSIA	outcome	|| id:ebi-a-GCST90001544	Weighted median	16	-0.0118164	0.0328458	0.719032	-0.0761942	0.0525614	0.988253	0.926636	1.05397
ebi-a-GCST90001544	gen_samplesize_1finngen_R9_O15_PRE_OR_ECLAMPSIA	outcome	|| id:ebi-a-GCST90001544	Weighted mode	16	-0.0141712	0.0287459	0.629164	-0.0705131	0.0421707	0.985929	0.931916	1.04307
ebi-a-GCST90001545	gen_samplesize_1finngen_R9_O15_PRE_OR_ECLAMPSIA	outcome	|| id:ebi-a-GCST90001545	Inverse variance weighted	7	-0.0522741	0.0519534	0.314332	-0.154103	0.0495545	0.949069	0.857184	1.0508
ebi-a-GCST90001545	gen_samplesize_1finngen_R9_O15_PRE_OR_ECLAMPSIA	outcome	|| id:ebi-a-GCST90001545	MR Egger	7	0.0301489	0.0798651	0.721296	-0.126387	0.186685	1.03061	0.881274	1.20525
ebi-a-GCST90001545	gen_samplesize_1finngen_R9_O15_PRE_OR_ECLAMPSIA	outcome	|| id:ebi-a-GCST90001545	Weighted median	7	0.0240853	0.0517302	0.641506	-0.0773059	0.125476	1.02438	0.925607	1.13369
ebi-a-GCST90001545	gen_samplesize_1finngen_R9_O15_PRE_OR_ECLAMPSIA	outcome	|| id:ebi-a-GCST90001545	Weighted mode	7	0.0327451	0.0555388	0.576976	-0.0761108	0.141601	1.03329	0.926713	1.15212
ebi-a-GCST90001546	gen_samplesize_1finngen_R9_O15_PRE_OR_ECLAMPSIA	outcome	|| id:ebi-a-GCST90001546	Inverse variance weighted (multiplicative random effects)	12	-0.0596203	0.0612012	0.329973	-0.179575	0.060334	0.942122	0.835626	1.06219
ebi-a-GCST90001546	gen_samplesize_1finngen_R9_O15_PRE_OR_ECLAMPSIA	outcome	|| id:ebi-a-GCST90001546	MR Egger	12	-0.228994	0.134581	0.119675	-0.492773	0.034785	0.795333	0.61093	1.0354
ebi-a-GCST90001546	gen_samplesize_1finngen_R9_O15_PRE_OR_ECLAMPSIA	outcome	|| id:ebi-a-GCST90001546	Weighted median	12	-0.0459442	0.0606748	0.448918	-0.164867	0.0729784	0.955095	0.848007	1.07571
ebi-a-GCST90001546	gen_samplesize_1finngen_R9_O15_PRE_OR_ECLAMPSIA	outcome	|| id:ebi-a-GCST90001546	Weighted mode	12	-0.00947671	0.0856908	0.913932	-0.177431	0.158477	0.990568	0.837419	1.17173
ebi-a-GCST90001547	gen_samplesize_1finngen_R9_O15_PRE_OR_ECLAMPSIA	outcome	|| id:ebi-a-GCST90001547	Inverse variance weighted (multiplicative random effects)	13	0.0156571	0.0328247	0.633369	-0.0486794	0.0799935	1.01578	0.952486	1.08328
ebi-a-GCST90001547	gen_samplesize_1finngen_R9_O15_PRE_OR_ECLAMPSIA	outcome	|| id:ebi-a-GCST90001547	MR Egger	13	0.0334239	0.0433988	0.457428	-0.0516378	0.118486	1.03399	0.949673	1.12579
ebi-a-GCST90001547	gen_samplesize_1finngen_R9_O15_PRE_OR_ECLAMPSIA	outcome	|| id:ebi-a-GCST90001547	Weighted median	13	0.0388565	0.027641	0.159796	-0.0153198	0.0930328	1.03962	0.984797	1.0975
ebi-a-GCST90001547	gen_samplesize_1finngen_R9_O15_PRE_OR_ECLAMPSIA	outcome	|| id:ebi-a-GCST90001547	Weighted mode	13	0.0285441	0.0253121	0.281496	-0.0210677	0.0781559	1.02896	0.979153	1.08129
ebi-a-GCST90001548	gen_samplesize_1finngen_R9_O15_PRE_OR_ECLAMPSIA	outcome	|| id:ebi-a-GCST90001548	Inverse variance weighted	11	0.0828623	0.0399615	0.038121	0.0045377	0.161187	1.08639	1.00455	1.1749
ebi-a-GCST90001548	gen_samplesize_1finngen_R9_O15_PRE_OR_ECLAMPSIA	outcome	|| id:ebi-a-GCST90001548	MR Egger	11	0.16729	0.0561261	0.0154342	0.0572831	0.277297	1.1821	1.05896	1.31956
ebi-a-GCST90001548	gen_samplesize_1finngen_R9_O15_PRE_OR_ECLAMPSIA	outcome	|| id:ebi-a-GCST90001548	Weighted median	11	0.113591	0.0579861	0.0501195	-6.13216e-05	0.227244	1.12029	0.999939	1.25514
ebi-a-GCST90001548	gen_samplesize_1finngen_R9_O15_PRE_OR_ECLAMPSIA	outcome	|| id:ebi-a-GCST90001548	Weighted mode	11	0.118128	0.0621066	0.0863338	-0.0036007	0.239857	1.12539	0.996406	1.27107
ebi-a-GCST90001549	gen_samplesize_1finngen_R9_O15_PRE_OR_ECLAMPSIA	outcome	|| id:ebi-a-GCST90001549	Inverse variance weighted (multiplicative random effects)	18	0.0325154	0.0432475	0.452143	-0.0522496	0.11728	1.03305	0.949092	1.12443
ebi-a-GCST90001549	gen_samplesize_1finngen_R9_O15_PRE_OR_ECLAMPSIA	outcome	|| id:ebi-a-GCST90001549	MR Egger	18	0.117845	0.0837769	0.178656	-0.0463576	0.282048	1.12507	0.9547	1.32584
ebi-a-GCST90001549	gen_samplesize_1finngen_R9_O15_PRE_OR_ECLAMPSIA	outcome	|| id:ebi-a-GCST90001549	Weighted median	18	0.0861048	0.0514072	0.093943	-0.0146534	0.186863	1.08992	0.985453	1.20546
ebi-a-GCST90001549	gen_samplesize_1finngen_R9_O15_PRE_OR_ECLAMPSIA	outcome	|| id:ebi-a-GCST90001549	Weighted mode	18	0.12632	0.0761839	0.115636	-0.0230009	0.27564	1.13464	0.977262	1.31737
ebi-a-GCST90001550	gen_samplesize_1finngen_R9_O15_PRE_OR_ECLAMPSIA	outcome	|| id:ebi-a-GCST90001550	Inverse variance weighted	9	0.0590923	0.051719	0.253219	-0.0422769	0.160462	1.06087	0.958604	1.17405
ebi-a-GCST90001550	gen_samplesize_1finngen_R9_O15_PRE_OR_ECLAMPSIA	outcome	|| id:ebi-a-GCST90001550	MR Egger	9	0.216597	0.0740795	0.0222179	0.0714015	0.361793	1.24184	1.07401	1.4359
ebi-a-GCST90001550	gen_samplesize_1finngen_R9_O15_PRE_OR_ECLAMPSIA	outcome	|| id:ebi-a-GCST90001550	Weighted median	9	0.103488	0.0615541	0.0927148	-0.0171583	0.224134	1.10903	0.982988	1.25124
ebi-a-GCST90001550	gen_samplesize_1finngen_R9_O15_PRE_OR_ECLAMPSIA	outcome	|| id:ebi-a-GCST90001550	Weighted mode	9	0.140398	0.0803424	0.118684	-0.0170731	0.297869	1.15073	0.983072	1.34699
ebi-a-GCST90001551	gen_samplesize_1finngen_R9_O15_PRE_OR_ECLAMPSIA	outcome	|| id:ebi-a-GCST90001551	Inverse variance weighted	20	-0.0039736	0.00558326	0.476651	-0.0149168	0.00696959	0.996034	0.985194	1.00699
ebi-a-GCST90001551	gen_samplesize_1finngen_R9_O15_PRE_OR_ECLAMPSIA	outcome	|| id:ebi-a-GCST90001551	MR Egger	20	-0.00205	0.00558668	0.71794	-0.0129999	0.00889991	0.997952	0.987084	1.00894
ebi-a-GCST90001551	gen_samplesize_1finngen_R9_O15_PRE_OR_ECLAMPSIA	outcome	|| id:ebi-a-GCST90001551	Weighted median	20	-0.00398793	0.00515133	0.438839	-0.0140845	0.00610867	0.99602	0.986014	1.00613
ebi-a-GCST90001551	gen_samplesize_1finngen_R9_O15_PRE_OR_ECLAMPSIA	outcome	|| id:ebi-a-GCST90001551	Weighted mode	20	-0.00386975	0.00483194	0.433109	-0.0133404	0.00560086	0.996138	0.986748	1.00562
ebi-a-GCST90001552	gen_samplesize_1finngen_R9_O15_PRE_OR_ECLAMPSIA	outcome	|| id:ebi-a-GCST90001552	Inverse variance weighted	20	-0.00501654	0.00417005	0.228979	-0.0131898	0.00315676	0.994996	0.986897	1.00316
ebi-a-GCST90001552	gen_samplesize_1finngen_R9_O15_PRE_OR_ECLAMPSIA	outcome	|| id:ebi-a-GCST90001552	MR Egger	20	-0.00334762	0.00429313	0.445664	-0.0117622	0.00506692	0.996658	0.988307	1.00508
ebi-a-GCST90001552	gen_samplesize_1finngen_R9_O15_PRE_OR_ECLAMPSIA	outcome	|| id:ebi-a-GCST90001552	Weighted median	20	-0.00392613	0.00477502	0.41095	-0.0132852	0.0054329	0.996082	0.986803	1.00545
ebi-a-GCST90001552	gen_samplesize_1finngen_R9_O15_PRE_OR_ECLAMPSIA	outcome	|| id:ebi-a-GCST90001552	Weighted mode	20	-0.00401748	0.00452964	0.386204	-0.0128956	0.0048606	0.995991	0.987187	1.00487
ebi-a-GCST90001553	gen_samplesize_1finngen_R9_O15_PRE_OR_ECLAMPSIA	outcome	|| id:ebi-a-GCST90001553	Inverse variance weighted	23	-0.00349615	0.00424523	0.410196	-0.0118168	0.00482449	0.99651	0.988253	1.00484
ebi-a-GCST90001553	gen_samplesize_1finngen_R9_O15_PRE_OR_ECLAMPSIA	outcome	|| id:ebi-a-GCST90001553	MR Egger	23	-0.00192944	0.00436978	0.663334	-0.0104942	0.00663533	0.998072	0.989561	1.00666
ebi-a-GCST90001553	gen_samplesize_1finngen_R9_O15_PRE_OR_ECLAMPSIA	outcome	|| id:ebi-a-GCST90001553	Weighted median	23	-0.00381106	0.00466429	0.413887	-0.0129531	0.00533094	0.996196	0.98713	1.00535
ebi-a-GCST90001553	gen_samplesize_1finngen_R9_O15_PRE_OR_ECLAMPSIA	outcome	|| id:ebi-a-GCST90001553	Weighted mode	23	-0.00380747	0.00499985	0.454434	-0.0136072	0.00599224	0.9962	0.986485	1.00601
ebi-a-GCST90001554	gen_samplesize_1finngen_R9_O15_PRE_OR_ECLAMPSIA	outcome	|| id:ebi-a-GCST90001554	Inverse variance weighted (multiplicative random effects)	15	0.0219104	0.0321147	0.495077	-0.0410343	0.0848552	1.02215	0.959796	1.08856
ebi-a-GCST90001554	gen_samplesize_1finngen_R9_O15_PRE_OR_ECLAMPSIA	outcome	|| id:ebi-a-GCST90001554	MR Egger	15	-0.0551574	0.0412767	0.204376	-0.13606	0.0257449	0.946336	0.872791	1.02608
ebi-a-GCST90001554	gen_samplesize_1finngen_R9_O15_PRE_OR_ECLAMPSIA	outcome	|| id:ebi-a-GCST90001554	Weighted median	15	-0.0197007	0.0335416	0.556967	-0.0854422	0.0460408	0.980492	0.918106	1.04712
ebi-a-GCST90001554	gen_samplesize_1finngen_R9_O15_PRE_OR_ECLAMPSIA	outcome	|| id:ebi-a-GCST90001554	Weighted mode	15	-0.0229867	0.0311425	0.472638	-0.084026	0.0380526	0.977275	0.919407	1.03879
ebi-a-GCST90001555	gen_samplesize_1finngen_R9_O15_PRE_OR_ECLAMPSIA	outcome	|| id:ebi-a-GCST90001555	Inverse variance weighted	14	-0.0119774	0.0128424	0.351004	-0.0371484	0.0131937	0.988094	0.963533	1.01328
ebi-a-GCST90001555	gen_samplesize_1finngen_R9_O15_PRE_OR_ECLAMPSIA	outcome	|| id:ebi-a-GCST90001555	MR Egger	14	-0.0186139	0.0149664	0.237354	-0.047948	0.0107203	0.981558	0.953183	1.01078
ebi-a-GCST90001555	gen_samplesize_1finngen_R9_O15_PRE_OR_ECLAMPSIA	outcome	|| id:ebi-a-GCST90001555	Weighted median	14	-0.00939741	0.0125609	0.45437	-0.0340167	0.0152219	0.990647	0.966555	1.01534
ebi-a-GCST90001555	gen_samplesize_1finngen_R9_O15_PRE_OR_ECLAMPSIA	outcome	|| id:ebi-a-GCST90001555	Weighted mode	14	-0.0108646	0.0109736	0.340211	-0.0323729	0.0106436	0.989194	0.968146	1.0107
ebi-a-GCST90001556	gen_samplesize_1finngen_R9_O15_PRE_OR_ECLAMPSIA	outcome	|| id:ebi-a-GCST90001556	Inverse variance weighted	8	-0.0044469	0.0219239	0.839265	-0.0474177	0.0385239	0.995563	0.953689	1.03928
ebi-a-GCST90001556	gen_samplesize_1finngen_R9_O15_PRE_OR_ECLAMPSIA	outcome	|| id:ebi-a-GCST90001556	MR Egger	8	-0.0291696	0.0245551	0.27975	-0.0772976	0.0189583	0.971252	0.925614	1.01914
ebi-a-GCST90001556	gen_samplesize_1finngen_R9_O15_PRE_OR_ECLAMPSIA	outcome	|| id:ebi-a-GCST90001556	Weighted median	8	-0.0114464	0.0224719	0.610496	-0.0554914	0.0325986	0.988619	0.94602	1.03314
ebi-a-GCST90001556	gen_samplesize_1finngen_R9_O15_PRE_OR_ECLAMPSIA	outcome	|| id:ebi-a-GCST90001556	Weighted mode	8	-0.0134626	0.0202376	0.527207	-0.0531283	0.0262031	0.986628	0.948258	1.02655
ebi-a-GCST90001557	gen_samplesize_1finngen_R9_O15_PRE_OR_ECLAMPSIA	outcome	|| id:ebi-a-GCST90001557	Inverse variance weighted	7	-0.0127927	0.0587687	0.82768	-0.127979	0.102394	0.987289	0.879872	1.10782
ebi-a-GCST90001557	gen_samplesize_1finngen_R9_O15_PRE_OR_ECLAMPSIA	outcome	|| id:ebi-a-GCST90001557	MR Egger	7	-0.188067	0.317241	0.579096	-0.80986	0.433726	0.828559	0.44492	1.543
ebi-a-GCST90001557	gen_samplesize_1finngen_R9_O15_PRE_OR_ECLAMPSIA	outcome	|| id:ebi-a-GCST90001557	Weighted median	7	0.00516502	0.0745999	0.944802	-0.141051	0.151381	1.00518	0.868445	1.16344
ebi-a-GCST90001557	gen_samplesize_1finngen_R9_O15_PRE_OR_ECLAMPSIA	outcome	|| id:ebi-a-GCST90001557	Weighted mode	7	0.016476	0.0888821	0.859047	-0.157733	0.190685	1.01661	0.854078	1.21008
ebi-a-GCST90001558	gen_samplesize_1finngen_R9_O15_PRE_OR_ECLAMPSIA	outcome	|| id:ebi-a-GCST90001558	Inverse variance weighted	10	-0.0367157	0.0242633	0.130224	-0.0842717	0.0108404	0.96395	0.919181	1.0109
ebi-a-GCST90001558	gen_samplesize_1finngen_R9_O15_PRE_OR_ECLAMPSIA	outcome	|| id:ebi-a-GCST90001558	MR Egger	10	-0.0300526	0.0402747	0.476904	-0.108991	0.0488858	0.970394	0.896738	1.0501
ebi-a-GCST90001558	gen_samplesize_1finngen_R9_O15_PRE_OR_ECLAMPSIA	outcome	|| id:ebi-a-GCST90001558	Weighted median	10	-0.00265396	0.0305294	0.930726	-0.0624916	0.0571837	0.99735	0.939421	1.05885
ebi-a-GCST90001558	gen_samplesize_1finngen_R9_O15_PRE_OR_ECLAMPSIA	outcome	|| id:ebi-a-GCST90001558	Weighted mode	10	-0.0117312	0.0252171	0.652835	-0.0611567	0.0376944	0.988337	0.940676	1.03841
ebi-a-GCST90001559	gen_samplesize_1finngen_R9_O15_PRE_OR_ECLAMPSIA	outcome	|| id:ebi-a-GCST90001559	Inverse variance weighted	7	-0.0433419	0.0277734	0.118629	-0.0977777	0.0110939	0.957584	0.90685	1.01116
ebi-a-GCST90001559	gen_samplesize_1finngen_R9_O15_PRE_OR_ECLAMPSIA	outcome	|| id:ebi-a-GCST90001559	MR Egger	7	-0.0211865	0.0390469	0.610712	-0.0977185	0.0553454	0.979036	0.906904	1.05691
ebi-a-GCST90001559	gen_samplesize_1finngen_R9_O15_PRE_OR_ECLAMPSIA	outcome	|| id:ebi-a-GCST90001559	Weighted median	7	-0.0312941	0.0329505	0.34225	-0.0958772	0.033289	0.96919	0.908576	1.03385
ebi-a-GCST90001559	gen_samplesize_1finngen_R9_O15_PRE_OR_ECLAMPSIA	outcome	|| id:ebi-a-GCST90001559	Weighted mode	7	-0.0174814	0.0302301	0.584114	-0.0767325	0.0417697	0.982671	0.926138	1.04265
ebi-a-GCST90001560	gen_samplesize_1finngen_R9_O15_PRE_OR_ECLAMPSIA	outcome	|| id:ebi-a-GCST90001560	Inverse variance weighted	13	-0.00238948	0.00546171	0.66175	-0.0130944	0.00831546	0.997613	0.986991	1.00835
ebi-a-GCST90001560	gen_samplesize_1finngen_R9_O15_PRE_OR_ECLAMPSIA	outcome	|| id:ebi-a-GCST90001560	MR Egger	13	-0.0023016	0.00586022	0.702008	-0.0137876	0.00918442	0.997701	0.986307	1.00923
ebi-a-GCST90001560	gen_samplesize_1finngen_R9_O15_PRE_OR_ECLAMPSIA	outcome	|| id:ebi-a-GCST90001560	Weighted median	13	-0.00375355	0.00648785	0.562892	-0.0164697	0.00896263	0.996253	0.983665	1.009
ebi-a-GCST90001560	gen_samplesize_1finngen_R9_O15_PRE_OR_ECLAMPSIA	outcome	|| id:ebi-a-GCST90001560	Weighted mode	13	-0.00211183	0.00587778	0.725621	-0.0136323	0.00940862	0.99789	0.98646	1.00945
ebi-a-GCST90001561	gen_samplesize_1finngen_R9_O15_PRE_OR_ECLAMPSIA	outcome	|| id:ebi-a-GCST90001561	Inverse variance weighted	15	0.0141273	0.0147579	0.33843	-0.0147981	0.0430527	1.01423	0.985311	1.04399
ebi-a-GCST90001561	gen_samplesize_1finngen_R9_O15_PRE_OR_ECLAMPSIA	outcome	|| id:ebi-a-GCST90001561	MR Egger	15	0.0174087	0.0178631	0.347562	-0.0176029	0.0524204	1.01756	0.982551	1.05382
ebi-a-GCST90001561	gen_samplesize_1finngen_R9_O15_PRE_OR_ECLAMPSIA	outcome	|| id:ebi-a-GCST90001561	Weighted median	15	0.0124608	0.0134137	0.35291	-0.0138301	0.0387516	1.01254	0.986265	1.03951
ebi-a-GCST90001561	gen_samplesize_1finngen_R9_O15_PRE_OR_ECLAMPSIA	outcome	|| id:ebi-a-GCST90001561	Weighted mode	15	0.0126479	0.0129087	0.343817	-0.0126532	0.0379489	1.01273	0.987427	1.03868
ebi-a-GCST90001562	gen_samplesize_1finngen_R9_O15_PRE_OR_ECLAMPSIA	outcome	|| id:ebi-a-GCST90001562	Inverse variance weighted (multiplicative random effects)	21	0.00272566	0.00781666	0.727315	-0.012595	0.0180463	1.00273	0.987484	1.01821
ebi-a-GCST90001562	gen_samplesize_1finngen_R9_O15_PRE_OR_ECLAMPSIA	outcome	|| id:ebi-a-GCST90001562	MR Egger	21	-3.63587e-05	0.00851617	0.996638	-0.016728	0.0166553	0.999964	0.983411	1.01679
ebi-a-GCST90001562	gen_samplesize_1finngen_R9_O15_PRE_OR_ECLAMPSIA	outcome	|| id:ebi-a-GCST90001562	Weighted median	21	-0.00179909	0.00810119	0.824254	-0.0176774	0.0140792	0.998203	0.982478	1.01418
ebi-a-GCST90001562	gen_samplesize_1finngen_R9_O15_PRE_OR_ECLAMPSIA	outcome	|| id:ebi-a-GCST90001562	Weighted mode	21	0.00302406	0.00610012	0.625483	-0.00893217	0.0149803	1.00303	0.991108	1.01509
ebi-a-GCST90001564	gen_samplesize_1finngen_R9_O15_PRE_OR_ECLAMPSIA	outcome	|| id:ebi-a-GCST90001564	Inverse variance weighted	6	0.0421459	0.0547759	0.441641	-0.0652148	0.149507	1.04305	0.936866	1.16126
ebi-a-GCST90001564	gen_samplesize_1finngen_R9_O15_PRE_OR_ECLAMPSIA	outcome	|| id:ebi-a-GCST90001564	MR Egger	6	-0.176456	0.109777	0.183244	-0.391617	0.0387064	0.838236	0.675963	1.03947
ebi-a-GCST90001564	gen_samplesize_1finngen_R9_O15_PRE_OR_ECLAMPSIA	outcome	|| id:ebi-a-GCST90001564	Weighted median	6	0.0146974	0.0584134	0.801343	-0.0997929	0.129188	1.01481	0.905025	1.1379
ebi-a-GCST90001564	gen_samplesize_1finngen_R9_O15_PRE_OR_ECLAMPSIA	outcome	|| id:ebi-a-GCST90001564	Weighted mode	6	-0.0287159	0.077009	0.724516	-0.179654	0.122222	0.971693	0.83556	1.13
ebi-a-GCST90001565	gen_samplesize_1finngen_R9_O15_PRE_OR_ECLAMPSIA	outcome	|| id:ebi-a-GCST90001565	Inverse variance weighted	7	-0.0360124	0.0286248	0.208362	-0.0921171	0.0200923	0.964628	0.911998	1.0203
ebi-a-GCST90001565	gen_samplesize_1finngen_R9_O15_PRE_OR_ECLAMPSIA	outcome	|| id:ebi-a-GCST90001565	MR Egger	7	-0.0494669	0.0337609	0.202756	-0.115638	0.0167045	0.951737	0.890797	1.01684
ebi-a-GCST90001565	gen_samplesize_1finngen_R9_O15_PRE_OR_ECLAMPSIA	outcome	|| id:ebi-a-GCST90001565	Weighted median	7	-0.0367947	0.035646	0.301968	-0.106661	0.0330716	0.963874	0.89883	1.03362
ebi-a-GCST90001565	gen_samplesize_1finngen_R9_O15_PRE_OR_ECLAMPSIA	outcome	|| id:ebi-a-GCST90001565	Weighted mode	7	-0.0373782	0.0342534	0.317044	-0.104515	0.0297585	0.963312	0.900761	1.03021
ebi-a-GCST90001566	gen_samplesize_1finngen_R9_O15_PRE_OR_ECLAMPSIA	outcome	|| id:ebi-a-GCST90001566	Inverse variance weighted	8	-0.0560893	0.0610941	0.358577	-0.175834	0.0636552	0.945455	0.838757	1.06572
ebi-a-GCST90001566	gen_samplesize_1finngen_R9_O15_PRE_OR_ECLAMPSIA	outcome	|| id:ebi-a-GCST90001566	MR Egger	8	0.0206389	0.140022	0.887646	-0.253804	0.295082	1.02085	0.775844	1.34324
ebi-a-GCST90001566	gen_samplesize_1finngen_R9_O15_PRE_OR_ECLAMPSIA	outcome	|| id:ebi-a-GCST90001566	Weighted median	8	0.0332638	0.072442	0.646106	-0.108722	0.17525	1.03382	0.896979	1.19154
ebi-a-GCST90001566	gen_samplesize_1finngen_R9_O15_PRE_OR_ECLAMPSIA	outcome	|| id:ebi-a-GCST90001566	Weighted mode	8	0.0605191	0.091223	0.528298	-0.118278	0.239316	1.06239	0.888449	1.27038
ebi-a-GCST90001567	gen_samplesize_1finngen_R9_O15_PRE_OR_ECLAMPSIA	outcome	|| id:ebi-a-GCST90001567	Inverse variance weighted	14	-0.0102509	0.0294513	0.727793	-0.0679754	0.0474736	0.989801	0.934283	1.04862
ebi-a-GCST90001567	gen_samplesize_1finngen_R9_O15_PRE_OR_ECLAMPSIA	outcome	|| id:ebi-a-GCST90001567	MR Egger	14	-0.00747096	0.0379797	0.847347	-0.0819111	0.0669692	0.992557	0.921354	1.06926
ebi-a-GCST90001567	gen_samplesize_1finngen_R9_O15_PRE_OR_ECLAMPSIA	outcome	|| id:ebi-a-GCST90001567	Weighted median	14	-0.00279576	0.0369739	0.939726	-0.0752646	0.0696731	0.997208	0.927498	1.07216
ebi-a-GCST90001567	gen_samplesize_1finngen_R9_O15_PRE_OR_ECLAMPSIA	outcome	|| id:ebi-a-GCST90001567	Weighted mode	14	-0.00306014	0.0366765	0.934776	-0.074946	0.0688258	0.996945	0.927794	1.07125
ebi-a-GCST90001568	gen_samplesize_1finngen_R9_O15_PRE_OR_ECLAMPSIA	outcome	|| id:ebi-a-GCST90001568	Inverse variance weighted	8	-0.050317	0.0629255	0.423926	-0.173651	0.073017	0.950928	0.84059	1.07575
ebi-a-GCST90001568	gen_samplesize_1finngen_R9_O15_PRE_OR_ECLAMPSIA	outcome	|| id:ebi-a-GCST90001568	MR Egger	8	0.00900317	0.280098	0.975401	-0.539989	0.557996	1.00904	0.582755	1.74717
ebi-a-GCST90001568	gen_samplesize_1finngen_R9_O15_PRE_OR_ECLAMPSIA	outcome	|| id:ebi-a-GCST90001568	Weighted median	8	0.0389085	0.073072	0.594401	-0.104313	0.18213	1.03968	0.900944	1.19977
ebi-a-GCST90001568	gen_samplesize_1finngen_R9_O15_PRE_OR_ECLAMPSIA	outcome	|| id:ebi-a-GCST90001568	Weighted mode	8	0.0643365	0.0904095	0.499726	-0.112866	0.241539	1.06645	0.89327	1.27321
ebi-a-GCST90001569	gen_samplesize_1finngen_R9_O15_PRE_OR_ECLAMPSIA	outcome	|| id:ebi-a-GCST90001569	Inverse variance weighted	11	-0.0053921	0.0427316	0.899585	-0.089146	0.0783618	0.994622	0.914712	1.08151
ebi-a-GCST90001569	gen_samplesize_1finngen_R9_O15_PRE_OR_ECLAMPSIA	outcome	|| id:ebi-a-GCST90001569	MR Egger	11	0.0884363	0.0751346	0.26937	-0.0588276	0.2357	1.09246	0.942869	1.26579
ebi-a-GCST90001569	gen_samplesize_1finngen_R9_O15_PRE_OR_ECLAMPSIA	outcome	|| id:ebi-a-GCST90001569	Weighted median	11	0.00292956	0.0516871	0.954801	-0.0983772	0.104236	1.00293	0.906307	1.10986
ebi-a-GCST90001569	gen_samplesize_1finngen_R9_O15_PRE_OR_ECLAMPSIA	outcome	|| id:ebi-a-GCST90001569	Weighted mode	11	-0.016251	0.0636634	0.803692	-0.141031	0.108529	0.98388	0.868462	1.11464
ebi-a-GCST90001570	gen_samplesize_1finngen_R9_O15_PRE_OR_ECLAMPSIA	outcome	|| id:ebi-a-GCST90001570	Inverse variance weighted (multiplicative random effects)	19	0.00279453	0.00801217	0.72725	-0.0129093	0.0184984	1.0028	0.987174	1.01867
ebi-a-GCST90001570	gen_samplesize_1finngen_R9_O15_PRE_OR_ECLAMPSIA	outcome	|| id:ebi-a-GCST90001570	MR Egger	19	0.000788986	0.00846821	0.926857	-0.0158087	0.0173867	1.00079	0.984316	1.01754
ebi-a-GCST90001570	gen_samplesize_1finngen_R9_O15_PRE_OR_ECLAMPSIA	outcome	|| id:ebi-a-GCST90001570	Weighted median	19	0.00168878	0.00687338	0.805915	-0.011783	0.0151606	1.00169	0.988286	1.01528
ebi-a-GCST90001570	gen_samplesize_1finngen_R9_O15_PRE_OR_ECLAMPSIA	outcome	|| id:ebi-a-GCST90001570	Weighted mode	19	0.00195823	0.00636218	0.761773	-0.0105116	0.0144281	1.00196	0.989543	1.01453
ebi-a-GCST90001571	gen_samplesize_1finngen_R9_O15_PRE_OR_ECLAMPSIA	outcome	|| id:ebi-a-GCST90001571	Inverse variance weighted	17	0.0331502	0.0340425	0.330161	-0.0335731	0.0998734	1.03371	0.966984	1.10503
ebi-a-GCST90001571	gen_samplesize_1finngen_R9_O15_PRE_OR_ECLAMPSIA	outcome	|| id:ebi-a-GCST90001571	MR Egger	17	0.0274014	0.0638122	0.673731	-0.0976706	0.152473	1.02778	0.906948	1.16471
ebi-a-GCST90001571	gen_samplesize_1finngen_R9_O15_PRE_OR_ECLAMPSIA	outcome	|| id:ebi-a-GCST90001571	Weighted median	17	0.0362763	0.0428855	0.397616	-0.0477794	0.120332	1.03694	0.953344	1.12787
ebi-a-GCST90001571	gen_samplesize_1finngen_R9_O15_PRE_OR_ECLAMPSIA	outcome	|| id:ebi-a-GCST90001571	Weighted mode	17	0.015728	0.0513662	0.763405	-0.0849498	0.116406	1.01585	0.918558	1.12345
ebi-a-GCST90001572	gen_samplesize_1finngen_R9_O15_PRE_OR_ECLAMPSIA	outcome	|| id:ebi-a-GCST90001572	Inverse variance weighted	10	-0.00163459	0.006261	0.794035	-0.0139062	0.010637	0.998367	0.98619	1.01069
ebi-a-GCST90001572	gen_samplesize_1finngen_R9_O15_PRE_OR_ECLAMPSIA	outcome	|| id:ebi-a-GCST90001572	MR Egger	10	-0.00105563	0.00652198	0.875431	-0.0138387	0.0117275	0.998945	0.986257	1.0118
ebi-a-GCST90001572	gen_samplesize_1finngen_R9_O15_PRE_OR_ECLAMPSIA	outcome	|| id:ebi-a-GCST90001572	Weighted median	10	-0.00168658	0.00716134	0.813812	-0.0157228	0.0123496	0.998315	0.9844	1.01243
ebi-a-GCST90001572	gen_samplesize_1finngen_R9_O15_PRE_OR_ECLAMPSIA	outcome	|| id:ebi-a-GCST90001572	Weighted mode	10	-0.00124927	0.00603874	0.840712	-0.0130852	0.0105867	0.998752	0.987	1.01064
ebi-a-GCST90001573	gen_samplesize_1finngen_R9_O15_PRE_OR_ECLAMPSIA	outcome	|| id:ebi-a-GCST90001573	Inverse variance weighted	18	-0.0159644	0.0307787	0.603981	-0.0762906	0.0443618	0.984162	0.926547	1.04536
ebi-a-GCST90001573	gen_samplesize_1finngen_R9_O15_PRE_OR_ECLAMPSIA	outcome	|| id:ebi-a-GCST90001573	MR Egger	18	0.0158378	0.050379	0.7573	-0.082905	0.114581	1.01596	0.920439	1.1214
ebi-a-GCST90001573	gen_samplesize_1finngen_R9_O15_PRE_OR_ECLAMPSIA	outcome	|| id:ebi-a-GCST90001573	Weighted median	18	0.00875917	0.0389592	0.822112	-0.0676009	0.0851193	1.0088	0.934633	1.08885
ebi-a-GCST90001573	gen_samplesize_1finngen_R9_O15_PRE_OR_ECLAMPSIA	outcome	|| id:ebi-a-GCST90001573	Weighted mode	18	0.0334315	0.0635835	0.605827	-0.0911923	0.158055	1.034	0.912842	1.17123
ebi-a-GCST90001574	gen_samplesize_1finngen_R9_O15_PRE_OR_ECLAMPSIA	outcome	|| id:ebi-a-GCST90001574	Inverse variance weighted	15	-0.00233319	0.00779938	0.764825	-0.01762	0.0129536	0.99767	0.982534	1.01304
ebi-a-GCST90001574	gen_samplesize_1finngen_R9_O15_PRE_OR_ECLAMPSIA	outcome	|| id:ebi-a-GCST90001574	MR Egger	15	-0.00119566	0.00834171	0.888223	-0.0175454	0.0151541	0.998805	0.982608	1.01527
ebi-a-GCST90001574	gen_samplesize_1finngen_R9_O15_PRE_OR_ECLAMPSIA	outcome	|| id:ebi-a-GCST90001574	Weighted median	15	-0.00174076	0.00680835	0.798198	-0.0150851	0.0116036	0.998261	0.985028	1.01167
ebi-a-GCST90001574	gen_samplesize_1finngen_R9_O15_PRE_OR_ECLAMPSIA	outcome	|| id:ebi-a-GCST90001574	Weighted mode	15	-0.00300613	0.0065677	0.654181	-0.0158788	0.00986656	0.996998	0.984247	1.00992
ebi-a-GCST90001575	gen_samplesize_1finngen_R9_O15_PRE_OR_ECLAMPSIA	outcome	|| id:ebi-a-GCST90001575	Inverse variance weighted	16	-0.0386332	0.0361669	0.285434	-0.10952	0.032254	0.962104	0.896264	1.03278
ebi-a-GCST90001575	gen_samplesize_1finngen_R9_O15_PRE_OR_ECLAMPSIA	outcome	|| id:ebi-a-GCST90001575	MR Egger	16	0.00436982	0.0647934	0.947183	-0.122625	0.131365	1.00438	0.884595	1.14038
ebi-a-GCST90001575	gen_samplesize_1finngen_R9_O15_PRE_OR_ECLAMPSIA	outcome	|| id:ebi-a-GCST90001575	Weighted median	16	-0.0350205	0.0429712	0.415086	-0.119244	0.049203	0.965586	0.887591	1.05043
ebi-a-GCST90001575	gen_samplesize_1finngen_R9_O15_PRE_OR_ECLAMPSIA	outcome	|| id:ebi-a-GCST90001575	Weighted mode	16	-0.0126975	0.0492337	0.799987	-0.109196	0.0838006	0.987383	0.896555	1.08741
ebi-a-GCST90001576	gen_samplesize_1finngen_R9_O15_PRE_OR_ECLAMPSIA	outcome	|| id:ebi-a-GCST90001576	Inverse variance weighted	10	-0.044161	0.0479532	0.357092	-0.138149	0.0498272	0.9568	0.870969	1.05109
ebi-a-GCST90001576	gen_samplesize_1finngen_R9_O15_PRE_OR_ECLAMPSIA	outcome	|| id:ebi-a-GCST90001576	MR Egger	10	-0.0392427	0.0968952	0.69609	-0.229157	0.150672	0.961517	0.795203	1.16262
ebi-a-GCST90001576	gen_samplesize_1finngen_R9_O15_PRE_OR_ECLAMPSIA	outcome	|| id:ebi-a-GCST90001576	Weighted median	10	-0.0423194	0.0600754	0.48116	-0.160067	0.0754283	0.958564	0.852087	1.07835
ebi-a-GCST90001576	gen_samplesize_1finngen_R9_O15_PRE_OR_ECLAMPSIA	outcome	|| id:ebi-a-GCST90001576	Weighted mode	10	-0.052345	0.0707246	0.478086	-0.190965	0.0862751	0.949001	0.826161	1.09011
ebi-a-GCST90001577	gen_samplesize_1finngen_R9_O15_PRE_OR_ECLAMPSIA	outcome	|| id:ebi-a-GCST90001577	Inverse variance weighted	20	0.0232291	0.0304369	0.44535	-0.0364272	0.0828854	1.0235	0.964228	1.08642
ebi-a-GCST90001577	gen_samplesize_1finngen_R9_O15_PRE_OR_ECLAMPSIA	outcome	|| id:ebi-a-GCST90001577	MR Egger	20	0.0481633	0.0443346	0.291655	-0.0387325	0.135059	1.04934	0.962008	1.1446
ebi-a-GCST90001577	gen_samplesize_1finngen_R9_O15_PRE_OR_ECLAMPSIA	outcome	|| id:ebi-a-GCST90001577	Weighted median	20	0.0298054	0.0364426	0.41343	-0.0416221	0.101233	1.03025	0.959232	1.10653
ebi-a-GCST90001577	gen_samplesize_1finngen_R9_O15_PRE_OR_ECLAMPSIA	outcome	|| id:ebi-a-GCST90001577	Weighted mode	20	0.0319157	0.0340704	0.360639	-0.0348624	0.0986937	1.03243	0.965738	1.10373
ebi-a-GCST90001578	gen_samplesize_1finngen_R9_O15_PRE_OR_ECLAMPSIA	outcome	|| id:ebi-a-GCST90001578	Inverse variance weighted	15	-0.0201838	0.0453317	0.656142	-0.109034	0.0686664	0.980019	0.8967	1.07108
ebi-a-GCST90001578	gen_samplesize_1finngen_R9_O15_PRE_OR_ECLAMPSIA	outcome	|| id:ebi-a-GCST90001578	MR Egger	15	-0.00440649	0.128792	0.973226	-0.25684	0.248027	0.995603	0.773492	1.28149
ebi-a-GCST90001578	gen_samplesize_1finngen_R9_O15_PRE_OR_ECLAMPSIA	outcome	|| id:ebi-a-GCST90001578	Weighted median	15	-0.00265822	0.0630789	0.966386	-0.126293	0.120977	0.997345	0.881357	1.1286
ebi-a-GCST90001578	gen_samplesize_1finngen_R9_O15_PRE_OR_ECLAMPSIA	outcome	|| id:ebi-a-GCST90001578	Weighted mode	15	-0.0924457	0.112041	0.42315	-0.312047	0.127156	0.911699	0.731947	1.13559
ebi-a-GCST90001579	gen_samplesize_1finngen_R9_O15_PRE_OR_ECLAMPSIA	outcome	|| id:ebi-a-GCST90001579	Inverse variance weighted	13	0.0427182	0.0364918	0.24175	-0.0288058	0.114242	1.04364	0.971605	1.12102
ebi-a-GCST90001579	gen_samplesize_1finngen_R9_O15_PRE_OR_ECLAMPSIA	outcome	|| id:ebi-a-GCST90001579	MR Egger	13	0.120789	0.0634179	0.0832913	-0.00350981	0.245088	1.12839	0.996496	1.27773
ebi-a-GCST90001579	gen_samplesize_1finngen_R9_O15_PRE_OR_ECLAMPSIA	outcome	|| id:ebi-a-GCST90001579	Weighted median	13	0.0682906	0.0425717	0.108685	-0.0151499	0.151731	1.07068	0.984964	1.16385
ebi-a-GCST90001579	gen_samplesize_1finngen_R9_O15_PRE_OR_ECLAMPSIA	outcome	|| id:ebi-a-GCST90001579	Weighted mode	13	0.0621748	0.0452935	0.194953	-0.0266004	0.15095	1.06415	0.97375	1.16294
ebi-a-GCST90001580	gen_samplesize_1finngen_R9_O15_PRE_OR_ECLAMPSIA	outcome	|| id:ebi-a-GCST90001580	Inverse variance weighted	11	0.0487786	0.0254143	0.0549414	-0.00103337	0.0985906	1.04999	0.998967	1.10361
ebi-a-GCST90001580	gen_samplesize_1finngen_R9_O15_PRE_OR_ECLAMPSIA	outcome	|| id:ebi-a-GCST90001580	MR Egger	11	0.0774124	0.0375035	0.069016	0.0039056	0.150919	1.08049	1.00391	1.1629
ebi-a-GCST90001580	gen_samplesize_1finngen_R9_O15_PRE_OR_ECLAMPSIA	outcome	|| id:ebi-a-GCST90001580	Weighted median	11	0.0570999	0.0332117	0.0855648	-0.00799496	0.122195	1.05876	0.992037	1.12997
ebi-a-GCST90001580	gen_samplesize_1finngen_R9_O15_PRE_OR_ECLAMPSIA	outcome	|| id:ebi-a-GCST90001580	Weighted mode	11	0.0643338	0.0346004	0.0926161	-0.00348307	0.132151	1.06645	0.996523	1.14128
ebi-a-GCST90001581	gen_samplesize_1finngen_R9_O15_PRE_OR_ECLAMPSIA	outcome	|| id:ebi-a-GCST90001581	Inverse variance weighted	14	-0.00275552	0.00275048	0.316425	-0.00814646	0.00263542	0.997248	0.991887	1.00264
ebi-a-GCST90001581	gen_samplesize_1finngen_R9_O15_PRE_OR_ECLAMPSIA	outcome	|| id:ebi-a-GCST90001581	MR Egger	14	-0.00290557	0.002945	0.343309	-0.00867776	0.00286662	0.997099	0.99136	1.00287
ebi-a-GCST90001581	gen_samplesize_1finngen_R9_O15_PRE_OR_ECLAMPSIA	outcome	|| id:ebi-a-GCST90001581	Weighted median	14	-0.00285915	0.00285882	0.317254	-0.00846244	0.00274414	0.997145	0.991573	1.00275
ebi-a-GCST90001581	gen_samplesize_1finngen_R9_O15_PRE_OR_ECLAMPSIA	outcome	|| id:ebi-a-GCST90001581	Weighted mode	14	-0.00250543	0.0026454	0.360866	-0.00769041	0.00267955	0.997498	0.992339	1.00268
ebi-a-GCST90001582	gen_samplesize_1finngen_R9_O15_PRE_OR_ECLAMPSIA	outcome	|| id:ebi-a-GCST90001582	Inverse variance weighted	14	0.0267315	0.0347997	0.442396	-0.0414758	0.0949389	1.02709	0.959373	1.09959
ebi-a-GCST90001582	gen_samplesize_1finngen_R9_O15_PRE_OR_ECLAMPSIA	outcome	|| id:ebi-a-GCST90001582	MR Egger	14	0.000247398	0.0649468	0.997023	-0.127048	0.127543	1.00025	0.880691	1.13603
ebi-a-GCST90001582	gen_samplesize_1finngen_R9_O15_PRE_OR_ECLAMPSIA	outcome	|| id:ebi-a-GCST90001582	Weighted median	14	-0.00873764	0.0490512	0.858618	-0.104878	0.0874027	0.9913	0.900434	1.09134
ebi-a-GCST90001582	gen_samplesize_1finngen_R9_O15_PRE_OR_ECLAMPSIA	outcome	|| id:ebi-a-GCST90001582	Weighted mode	14	0.00556406	0.0456578	0.90487	-0.0839252	0.0950533	1.00558	0.9195	1.09972
ebi-a-GCST90001583	gen_samplesize_1finngen_R9_O15_PRE_OR_ECLAMPSIA	outcome	|| id:ebi-a-GCST90001583	Inverse variance weighted	16	-0.0135119	0.0130285	0.299687	-0.0390478	0.0120239	0.986579	0.961705	1.0121
ebi-a-GCST90001583	gen_samplesize_1finngen_R9_O15_PRE_OR_ECLAMPSIA	outcome	|| id:ebi-a-GCST90001583	MR Egger	16	-0.0195837	0.014927	0.210637	-0.0488405	0.00967317	0.980607	0.952333	1.00972
ebi-a-GCST90001583	gen_samplesize_1finngen_R9_O15_PRE_OR_ECLAMPSIA	outcome	|| id:ebi-a-GCST90001583	Weighted median	16	-0.0227397	0.0159397	0.153692	-0.0539815	0.00850205	0.977517	0.94745	1.00854
ebi-a-GCST90001583	gen_samplesize_1finngen_R9_O15_PRE_OR_ECLAMPSIA	outcome	|| id:ebi-a-GCST90001583	Weighted mode	16	-0.0186697	0.0153834	0.243653	-0.0488212	0.0114817	0.981503	0.952351	1.01155
ebi-a-GCST90001584	gen_samplesize_1finngen_R9_O15_PRE_OR_ECLAMPSIA	outcome	|| id:ebi-a-GCST90001584	Inverse variance weighted	11	0.0908212	0.0364638	0.0127484	0.0193522	0.16229	1.09507	1.01954	1.1762
ebi-a-GCST90001584	gen_samplesize_1finngen_R9_O15_PRE_OR_ECLAMPSIA	outcome	|| id:ebi-a-GCST90001584	MR Egger	11	0.0538639	0.060629	0.397438	-0.0649689	0.172697	1.05534	0.937097	1.18851
ebi-a-GCST90001584	gen_samplesize_1finngen_R9_O15_PRE_OR_ECLAMPSIA	outcome	|| id:ebi-a-GCST90001584	Weighted median	11	0.0759805	0.0487255	0.118912	-0.0195215	0.171482	1.07894	0.980668	1.18706
ebi-a-GCST90001584	gen_samplesize_1finngen_R9_O15_PRE_OR_ECLAMPSIA	outcome	|| id:ebi-a-GCST90001584	Weighted mode	11	0.0735538	0.0594763	0.244459	-0.0430199	0.190127	1.07633	0.957892	1.2094
ebi-a-GCST90001585	gen_samplesize_1finngen_R9_O15_PRE_OR_ECLAMPSIA	outcome	|| id:ebi-a-GCST90001585	Inverse variance weighted	16	0.0466014	0.0264028	0.077561	-0.00514812	0.098351	1.0477	0.994865	1.10335
ebi-a-GCST90001585	gen_samplesize_1finngen_R9_O15_PRE_OR_ECLAMPSIA	outcome	|| id:ebi-a-GCST90001585	MR Egger	16	0.0783593	0.0494255	0.135197	-0.0185146	0.175233	1.08151	0.981656	1.19152
ebi-a-GCST90001585	gen_samplesize_1finngen_R9_O15_PRE_OR_ECLAMPSIA	outcome	|| id:ebi-a-GCST90001585	Weighted median	16	0.0783183	0.0349349	0.0249721	0.00984585	0.146791	1.08147	1.00989	1.15811
ebi-a-GCST90001585	gen_samplesize_1finngen_R9_O15_PRE_OR_ECLAMPSIA	outcome	|| id:ebi-a-GCST90001585	Weighted mode	16	0.0755465	0.0332937	0.03845	0.0102908	0.140802	1.07847	1.01034	1.1512
ebi-a-GCST90001586	gen_samplesize_1finngen_R9_O15_PRE_OR_ECLAMPSIA	outcome	|| id:ebi-a-GCST90001586	Inverse variance weighted	14	-0.0234716	0.0113937	0.0393932	-0.0458031	-0.00114001	0.976802	0.95523	0.998861
ebi-a-GCST90001586	gen_samplesize_1finngen_R9_O15_PRE_OR_ECLAMPSIA	outcome	|| id:ebi-a-GCST90001586	MR Egger	14	-0.0209932	0.0127278	0.124978	-0.0459397	0.00395331	0.979226	0.9551	1.00396
ebi-a-GCST90001586	gen_samplesize_1finngen_R9_O15_PRE_OR_ECLAMPSIA	outcome	|| id:ebi-a-GCST90001586	Weighted median	14	-0.0238535	0.0148345	0.107841	-0.052929	0.00522212	0.976429	0.948447	1.00524
ebi-a-GCST90001586	gen_samplesize_1finngen_R9_O15_PRE_OR_ECLAMPSIA	outcome	|| id:ebi-a-GCST90001586	Weighted mode	14	-0.023835	0.0126288	0.0816404	-0.0485875	0.000917454	0.976447	0.952574	1.00092
ebi-a-GCST90001587	gen_samplesize_1finngen_R9_O15_PRE_OR_ECLAMPSIA	outcome	|| id:ebi-a-GCST90001587	Inverse variance weighted	11	0.031823	0.0363634	0.381499	-0.0394493	0.103095	1.03233	0.961319	1.1086
ebi-a-GCST90001587	gen_samplesize_1finngen_R9_O15_PRE_OR_ECLAMPSIA	outcome	|| id:ebi-a-GCST90001587	MR Egger	11	0.010203	0.0674149	0.88304	-0.12193	0.142336	1.01026	0.88521	1.15296
ebi-a-GCST90001587	gen_samplesize_1finngen_R9_O15_PRE_OR_ECLAMPSIA	outcome	|| id:ebi-a-GCST90001587	Weighted median	11	0.0580782	0.0491201	0.237058	-0.0381971	0.154354	1.0598	0.962523	1.1669
ebi-a-GCST90001587	gen_samplesize_1finngen_R9_O15_PRE_OR_ECLAMPSIA	outcome	|| id:ebi-a-GCST90001587	Weighted mode	11	0.0542926	0.054641	0.34384	-0.0528038	0.161389	1.05579	0.948566	1.17514
ebi-a-GCST90001588	gen_samplesize_1finngen_R9_O15_PRE_OR_ECLAMPSIA	outcome	|| id:ebi-a-GCST90001588	Inverse variance weighted	14	0.0411948	0.0316238	0.192693	-0.0207878	0.103178	1.04206	0.979427	1.10869
ebi-a-GCST90001588	gen_samplesize_1finngen_R9_O15_PRE_OR_ECLAMPSIA	outcome	|| id:ebi-a-GCST90001588	MR Egger	14	0.0793143	0.0525584	0.157152	-0.0237001	0.182329	1.08254	0.976579	1.20001
ebi-a-GCST90001588	gen_samplesize_1finngen_R9_O15_PRE_OR_ECLAMPSIA	outcome	|| id:ebi-a-GCST90001588	Weighted median	14	0.0149644	0.0438326	0.732804	-0.0709475	0.100876	1.01508	0.931511	1.10614
ebi-a-GCST90001588	gen_samplesize_1finngen_R9_O15_PRE_OR_ECLAMPSIA	outcome	|| id:ebi-a-GCST90001588	Weighted mode	14	0.00585329	0.0495903	0.907846	-0.0913437	0.10305	1.00587	0.912704	1.10855
ebi-a-GCST90001589	gen_samplesize_1finngen_R9_O15_PRE_OR_ECLAMPSIA	outcome	|| id:ebi-a-GCST90001589	Inverse variance weighted	6	-0.0179521	0.0506054	0.722779	-0.117139	0.0812345	0.982208	0.889462	1.08463
ebi-a-GCST90001589	gen_samplesize_1finngen_R9_O15_PRE_OR_ECLAMPSIA	outcome	|| id:ebi-a-GCST90001589	MR Egger	6	0.0015696	0.0952009	0.987635	-0.185024	0.188163	1.00157	0.831084	1.20703
ebi-a-GCST90001589	gen_samplesize_1finngen_R9_O15_PRE_OR_ECLAMPSIA	outcome	|| id:ebi-a-GCST90001589	Weighted median	6	-0.0192639	0.0552682	0.727425	-0.12759	0.0890619	0.98092	0.880215	1.09315
ebi-a-GCST90001589	gen_samplesize_1finngen_R9_O15_PRE_OR_ECLAMPSIA	outcome	|| id:ebi-a-GCST90001589	Weighted mode	6	-0.00498767	0.0559147	0.932385	-0.11458	0.104605	0.995025	0.89174	1.11027
ebi-a-GCST90001590	gen_samplesize_1finngen_R9_O15_PRE_OR_ECLAMPSIA	outcome	|| id:ebi-a-GCST90001590	Inverse variance weighted (multiplicative random effects)	14	-0.0119745	0.0448781	0.789605	-0.0999355	0.0759865	0.988097	0.904896	1.07895
ebi-a-GCST90001590	gen_samplesize_1finngen_R9_O15_PRE_OR_ECLAMPSIA	outcome	|| id:ebi-a-GCST90001590	MR Egger	14	-0.039537	0.0598348	0.521244	-0.156813	0.0777393	0.961234	0.854864	1.08084
ebi-a-GCST90001590	gen_samplesize_1finngen_R9_O15_PRE_OR_ECLAMPSIA	outcome	|| id:ebi-a-GCST90001590	Weighted median	14	-0.0326424	0.028525	0.252481	-0.0885514	0.0232666	0.967885	0.915256	1.02354
ebi-a-GCST90001590	gen_samplesize_1finngen_R9_O15_PRE_OR_ECLAMPSIA	outcome	|| id:ebi-a-GCST90001590	Weighted mode	14	-0.0338116	0.0266958	0.227539	-0.0861353	0.0185121	0.966754	0.91747	1.01868
ebi-a-GCST90001591	gen_samplesize_1finngen_R9_O15_PRE_OR_ECLAMPSIA	outcome	|| id:ebi-a-GCST90001591	Inverse variance weighted	10	-0.0343129	0.0509704	0.500824	-0.134215	0.0655891	0.966269	0.874402	1.06779
ebi-a-GCST90001591	gen_samplesize_1finngen_R9_O15_PRE_OR_ECLAMPSIA	outcome	|| id:ebi-a-GCST90001591	MR Egger	10	0.0458742	0.0824684	0.593244	-0.115764	0.207512	1.04694	0.890685	1.23061
ebi-a-GCST90001591	gen_samplesize_1finngen_R9_O15_PRE_OR_ECLAMPSIA	outcome	|| id:ebi-a-GCST90001591	Weighted median	10	0.00202618	0.0595302	0.972848	-0.114653	0.118705	1.00203	0.891676	1.12604
ebi-a-GCST90001591	gen_samplesize_1finngen_R9_O15_PRE_OR_ECLAMPSIA	outcome	|| id:ebi-a-GCST90001591	Weighted mode	10	0.00373863	0.0640157	0.954705	-0.121732	0.129209	1.00375	0.885386	1.13793
ebi-a-GCST90001592	gen_samplesize_1finngen_R9_O15_PRE_OR_ECLAMPSIA	outcome	|| id:ebi-a-GCST90001592	Inverse variance weighted (multiplicative random effects)	15	0.0125911	0.0282884	0.656249	-0.0428542	0.0680364	1.01267	0.958051	1.0704
ebi-a-GCST90001592	gen_samplesize_1finngen_R9_O15_PRE_OR_ECLAMPSIA	outcome	|| id:ebi-a-GCST90001592	MR Egger	15	-0.0374198	0.0372582	0.333545	-0.110446	0.0356063	0.963272	0.895435	1.03625
ebi-a-GCST90001592	gen_samplesize_1finngen_R9_O15_PRE_OR_ECLAMPSIA	outcome	|| id:ebi-a-GCST90001592	Weighted median	15	0.0179931	0.0293965	0.540483	-0.039624	0.0756101	1.01816	0.961151	1.07854
ebi-a-GCST90001592	gen_samplesize_1finngen_R9_O15_PRE_OR_ECLAMPSIA	outcome	|| id:ebi-a-GCST90001592	Weighted mode	15	-0.008878	0.0273168	0.749986	-0.0624189	0.0446629	0.991161	0.939489	1.04568
ebi-a-GCST90001593	gen_samplesize_1finngen_R9_O15_PRE_OR_ECLAMPSIA	outcome	|| id:ebi-a-GCST90001593	Inverse variance weighted	9	-0.000798693	0.0267586	0.976188	-0.0532455	0.0516481	0.999202	0.948147	1.05301
ebi-a-GCST90001593	gen_samplesize_1finngen_R9_O15_PRE_OR_ECLAMPSIA	outcome	|| id:ebi-a-GCST90001593	MR Egger	9	-0.0163515	0.0399417	0.694495	-0.0946372	0.0619343	0.983781	0.909703	1.06389
ebi-a-GCST90001593	gen_samplesize_1finngen_R9_O15_PRE_OR_ECLAMPSIA	outcome	|| id:ebi-a-GCST90001593	Weighted median	9	-0.00340804	0.0348539	0.922107	-0.0717217	0.0649056	0.996598	0.93079	1.06706
ebi-a-GCST90001593	gen_samplesize_1finngen_R9_O15_PRE_OR_ECLAMPSIA	outcome	|| id:ebi-a-GCST90001593	Weighted mode	9	-0.00416203	0.0310188	0.896576	-0.0649588	0.0566347	0.995847	0.937106	1.05827
ebi-a-GCST90001594	gen_samplesize_1finngen_R9_O15_PRE_OR_ECLAMPSIA	outcome	|| id:ebi-a-GCST90001594	Inverse variance weighted	10	-0.0563728	0.0384108	0.142205	-0.131658	0.0189123	0.945187	0.876641	1.01909
ebi-a-GCST90001594	gen_samplesize_1finngen_R9_O15_PRE_OR_ECLAMPSIA	outcome	|| id:ebi-a-GCST90001594	MR Egger	10	0.0112127	0.0704906	0.877559	-0.126949	0.149374	1.01128	0.880779	1.16111
ebi-a-GCST90001594	gen_samplesize_1finngen_R9_O15_PRE_OR_ECLAMPSIA	outcome	|| id:ebi-a-GCST90001594	Weighted median	10	-0.0686305	0.0474187	0.147804	-0.161571	0.0243101	0.933672	0.850806	1.02461
ebi-a-GCST90001594	gen_samplesize_1finngen_R9_O15_PRE_OR_ECLAMPSIA	outcome	|| id:ebi-a-GCST90001594	Weighted mode	10	-0.0528693	0.0558341	0.368419	-0.162304	0.0565656	0.948504	0.850183	1.0582
ebi-a-GCST90001595	gen_samplesize_1finngen_R9_O15_PRE_OR_ECLAMPSIA	outcome	|| id:ebi-a-GCST90001595	Inverse variance weighted	4	-0.108364	0.0745055	0.145822	-0.254395	0.0376663	0.8973	0.775385	1.03838
ebi-a-GCST90001595	gen_samplesize_1finngen_R9_O15_PRE_OR_ECLAMPSIA	outcome	|| id:ebi-a-GCST90001595	MR Egger	4	0.0763888	0.179908	0.712444	-0.276231	0.429009	1.07938	0.758637	1.53573
ebi-a-GCST90001595	gen_samplesize_1finngen_R9_O15_PRE_OR_ECLAMPSIA	outcome	|| id:ebi-a-GCST90001595	Weighted median	4	-0.117586	0.0921456	0.201925	-0.298191	0.0630196	0.889064	0.742159	1.06505
ebi-a-GCST90001595	gen_samplesize_1finngen_R9_O15_PRE_OR_ECLAMPSIA	outcome	|| id:ebi-a-GCST90001595	Weighted mode	4	-0.0242209	0.101744	0.82717	-0.223639	0.175198	0.97607	0.799603	1.19148
ebi-a-GCST90001596	gen_samplesize_1finngen_R9_O15_PRE_OR_ECLAMPSIA	outcome	|| id:ebi-a-GCST90001596	Inverse variance weighted	12	0.000412364	0.0231486	0.985787	-0.044959	0.0457837	1.00041	0.956037	1.04685
ebi-a-GCST90001596	gen_samplesize_1finngen_R9_O15_PRE_OR_ECLAMPSIA	outcome	|| id:ebi-a-GCST90001596	MR Egger	12	0.00538892	0.0314741	0.867467	-0.0563002	0.0670781	1.0054	0.945255	1.06938
ebi-a-GCST90001596	gen_samplesize_1finngen_R9_O15_PRE_OR_ECLAMPSIA	outcome	|| id:ebi-a-GCST90001596	Weighted median	12	0.00435836	0.0292387	0.881505	-0.0529494	0.0616662	1.00437	0.948428	1.06361
ebi-a-GCST90001596	gen_samplesize_1finngen_R9_O15_PRE_OR_ECLAMPSIA	outcome	|| id:ebi-a-GCST90001596	Weighted mode	12	0.00549168	0.0269222	0.842091	-0.0472758	0.0582591	1.00551	0.953824	1.05999
ebi-a-GCST90001597	gen_samplesize_1finngen_R9_O15_PRE_OR_ECLAMPSIA	outcome	|| id:ebi-a-GCST90001597	Inverse variance weighted	10	-0.0348204	0.0438078	0.426704	-0.120684	0.0510429	0.965779	0.886314	1.05237
ebi-a-GCST90001597	gen_samplesize_1finngen_R9_O15_PRE_OR_ECLAMPSIA	outcome	|| id:ebi-a-GCST90001597	MR Egger	10	0.0553507	0.101798	0.601446	-0.144173	0.254875	1.05691	0.865738	1.2903
ebi-a-GCST90001597	gen_samplesize_1finngen_R9_O15_PRE_OR_ECLAMPSIA	outcome	|| id:ebi-a-GCST90001597	Weighted median	10	-0.0021135	0.0588048	0.971329	-0.117371	0.113144	0.997889	0.889255	1.11979
ebi-a-GCST90001597	gen_samplesize_1finngen_R9_O15_PRE_OR_ECLAMPSIA	outcome	|| id:ebi-a-GCST90001597	Weighted mode	10	0.00747531	0.0640666	0.909676	-0.118095	0.133046	1.0075	0.888611	1.1423
ebi-a-GCST90001598	gen_samplesize_1finngen_R9_O15_PRE_OR_ECLAMPSIA	outcome	|| id:ebi-a-GCST90001598	Inverse variance weighted	13	-0.0052546	0.0428236	0.902342	-0.0891888	0.0786796	0.994759	0.914673	1.08186
ebi-a-GCST90001598	gen_samplesize_1finngen_R9_O15_PRE_OR_ECLAMPSIA	outcome	|| id:ebi-a-GCST90001598	MR Egger	13	-0.120093	0.0859655	0.18996	-0.288585	0.0483995	0.886838	0.749323	1.04959
ebi-a-GCST90001598	gen_samplesize_1finngen_R9_O15_PRE_OR_ECLAMPSIA	outcome	|| id:ebi-a-GCST90001598	Weighted median	13	-0.000904322	0.0465937	0.984515	-0.092228	0.0904193	0.999096	0.911897	1.09463
ebi-a-GCST90001598	gen_samplesize_1finngen_R9_O15_PRE_OR_ECLAMPSIA	outcome	|| id:ebi-a-GCST90001598	Weighted mode	13	0.0135147	0.059458	0.824018	-0.103023	0.130052	1.01361	0.902106	1.13889
ebi-a-GCST90001599	gen_samplesize_1finngen_R9_O15_PRE_OR_ECLAMPSIA	outcome	|| id:ebi-a-GCST90001599	Inverse variance weighted	8	-0.0468579	0.0491983	0.340879	-0.143287	0.0495707	0.954223	0.866506	1.05082
ebi-a-GCST90001599	gen_samplesize_1finngen_R9_O15_PRE_OR_ECLAMPSIA	outcome	|| id:ebi-a-GCST90001599	MR Egger	8	-0.000307987	0.122482	0.998075	-0.240372	0.239756	0.999692	0.786335	1.27094
ebi-a-GCST90001599	gen_samplesize_1finngen_R9_O15_PRE_OR_ECLAMPSIA	outcome	|| id:ebi-a-GCST90001599	Weighted median	8	0.0256796	0.063867	0.687626	-0.0994998	0.150859	1.02601	0.90529	1.16283
ebi-a-GCST90001599	gen_samplesize_1finngen_R9_O15_PRE_OR_ECLAMPSIA	outcome	|| id:ebi-a-GCST90001599	Weighted mode	8	0.0296862	0.0875326	0.744448	-0.141878	0.20125	1.03013	0.867727	1.22293
ebi-a-GCST90001600	gen_samplesize_1finngen_R9_O15_PRE_OR_ECLAMPSIA	outcome	|| id:ebi-a-GCST90001600	Inverse variance weighted	8	-0.0170446	0.0368343	0.643552	-0.0892398	0.0551505	0.9831	0.914626	1.0567
ebi-a-GCST90001600	gen_samplesize_1finngen_R9_O15_PRE_OR_ECLAMPSIA	outcome	|| id:ebi-a-GCST90001600	MR Egger	8	0.0181565	0.0891792	0.845399	-0.156635	0.192948	1.01832	0.855016	1.21282
ebi-a-GCST90001600	gen_samplesize_1finngen_R9_O15_PRE_OR_ECLAMPSIA	outcome	|| id:ebi-a-GCST90001600	Weighted median	8	-0.0125994	0.0447062	0.778076	-0.100224	0.0750248	0.98748	0.904635	1.07791
ebi-a-GCST90001600	gen_samplesize_1finngen_R9_O15_PRE_OR_ECLAMPSIA	outcome	|| id:ebi-a-GCST90001600	Weighted mode	8	-0.0152886	0.0455173	0.7468	-0.104503	0.0739253	0.984828	0.900773	1.07673
ebi-a-GCST90001601	gen_samplesize_1finngen_R9_O15_PRE_OR_ECLAMPSIA	outcome	|| id:ebi-a-GCST90001601	Inverse variance weighted (multiplicative random effects)	9	0.00292101	0.0724759	0.967851	-0.139132	0.144974	1.00293	0.870113	1.15601
ebi-a-GCST90001601	gen_samplesize_1finngen_R9_O15_PRE_OR_ECLAMPSIA	outcome	|| id:ebi-a-GCST90001601	MR Egger	9	-0.188117	0.0679812	0.0278066	-0.32136	-0.0548735	0.828518	0.725162	0.946605
ebi-a-GCST90001601	gen_samplesize_1finngen_R9_O15_PRE_OR_ECLAMPSIA	outcome	|| id:ebi-a-GCST90001601	Weighted median	9	-0.0779402	0.0443198	0.0786479	-0.164807	0.00892664	0.92502	0.848057	1.00897
ebi-a-GCST90001601	gen_samplesize_1finngen_R9_O15_PRE_OR_ECLAMPSIA	outcome	|| id:ebi-a-GCST90001601	Weighted mode	9	-0.0826486	0.0466536	0.114418	-0.17409	0.00879244	0.920675	0.840222	1.00883
ebi-a-GCST90001602	gen_samplesize_1finngen_R9_O15_PRE_OR_ECLAMPSIA	outcome	|| id:ebi-a-GCST90001602	Inverse variance weighted	13	0.00561783	0.029329	0.848099	-0.0518671	0.0631027	1.00563	0.949455	1.06514
ebi-a-GCST90001602	gen_samplesize_1finngen_R9_O15_PRE_OR_ECLAMPSIA	outcome	|| id:ebi-a-GCST90001602	MR Egger	13	0.0240432	0.0422417	0.580669	-0.0587504	0.106837	1.02433	0.942942	1.11275
ebi-a-GCST90001602	gen_samplesize_1finngen_R9_O15_PRE_OR_ECLAMPSIA	outcome	|| id:ebi-a-GCST90001602	Weighted median	13	0.0174724	0.0404331	0.665645	-0.0617764	0.0967212	1.01763	0.940093	1.10155
ebi-a-GCST90001602	gen_samplesize_1finngen_R9_O15_PRE_OR_ECLAMPSIA	outcome	|| id:ebi-a-GCST90001602	Weighted mode	13	0.019165	0.0386574	0.629015	-0.0566035	0.0949334	1.01935	0.944969	1.09959
ebi-a-GCST90001603	gen_samplesize_1finngen_R9_O15_PRE_OR_ECLAMPSIA	outcome	|| id:ebi-a-GCST90001603	Inverse variance weighted (multiplicative random effects)	7	0.0926033	0.0969419	0.339454	-0.0974029	0.282609	1.09703	0.90719	1.32659
ebi-a-GCST90001603	gen_samplesize_1finngen_R9_O15_PRE_OR_ECLAMPSIA	outcome	|| id:ebi-a-GCST90001603	MR Egger	7	-0.108811	0.190193	0.592009	-0.481589	0.263967	0.8969	0.617801	1.30209
ebi-a-GCST90001603	gen_samplesize_1finngen_R9_O15_PRE_OR_ECLAMPSIA	outcome	|| id:ebi-a-GCST90001603	Weighted median	7	-0.038185	0.0698946	0.584844	-0.175178	0.0988085	0.962535	0.839307	1.10385
ebi-a-GCST90001603	gen_samplesize_1finngen_R9_O15_PRE_OR_ECLAMPSIA	outcome	|| id:ebi-a-GCST90001603	Weighted mode	7	-0.0467703	0.0785914	0.573516	-0.20081	0.107269	0.954307	0.818068	1.11323
ebi-a-GCST90001604	gen_samplesize_1finngen_R9_O15_PRE_OR_ECLAMPSIA	outcome	|| id:ebi-a-GCST90001604	Inverse variance weighted	10	0.0536785	0.040117	0.18088	-0.0249507	0.132308	1.05515	0.975358	1.14146
ebi-a-GCST90001604	gen_samplesize_1finngen_R9_O15_PRE_OR_ECLAMPSIA	outcome	|| id:ebi-a-GCST90001604	MR Egger	10	-0.0154368	0.139895	0.914854	-0.289632	0.258758	0.984682	0.748539	1.29532
ebi-a-GCST90001604	gen_samplesize_1finngen_R9_O15_PRE_OR_ECLAMPSIA	outcome	|| id:ebi-a-GCST90001604	Weighted median	10	0.0306734	0.0531017	0.563511	-0.073406	0.134753	1.03115	0.929223	1.14425
ebi-a-GCST90001604	gen_samplesize_1finngen_R9_O15_PRE_OR_ECLAMPSIA	outcome	|| id:ebi-a-GCST90001604	Weighted mode	10	0.0186931	0.0588152	0.757866	-0.0965847	0.133971	1.01887	0.907933	1.14336
ebi-a-GCST90001605	gen_samplesize_1finngen_R9_O15_PRE_OR_ECLAMPSIA	outcome	|| id:ebi-a-GCST90001605	Inverse variance weighted	13	0.000883249	0.0196839	0.96421	-0.0376972	0.0394637	1.00088	0.963005	1.04025
ebi-a-GCST90001605	gen_samplesize_1finngen_R9_O15_PRE_OR_ECLAMPSIA	outcome	|| id:ebi-a-GCST90001605	MR Egger	13	0.00973607	0.0239819	0.692546	-0.0372685	0.0567406	1.00978	0.963417	1.05838
ebi-a-GCST90001605	gen_samplesize_1finngen_R9_O15_PRE_OR_ECLAMPSIA	outcome	|| id:ebi-a-GCST90001605	Weighted median	13	0.00430718	0.0240765	0.85802	-0.0428828	0.0514972	1.00432	0.958024	1.05285
ebi-a-GCST90001605	gen_samplesize_1finngen_R9_O15_PRE_OR_ECLAMPSIA	outcome	|| id:ebi-a-GCST90001605	Weighted mode	13	0.00464549	0.0231904	0.844586	-0.0408077	0.0500987	1.00466	0.960014	1.05137
ebi-a-GCST90001606	gen_samplesize_1finngen_R9_O15_PRE_OR_ECLAMPSIA	outcome	|| id:ebi-a-GCST90001606	Inverse variance weighted (multiplicative random effects)	6	0.08388	0.0982825	0.393405	-0.108754	0.276514	1.0875	0.896951	1.31852
ebi-a-GCST90001606	gen_samplesize_1finngen_R9_O15_PRE_OR_ECLAMPSIA	outcome	|| id:ebi-a-GCST90001606	MR Egger	6	0.37344	0.152901	0.0710269	0.0737544	0.673125	1.45272	1.07654	1.96035
ebi-a-GCST90001606	gen_samplesize_1finngen_R9_O15_PRE_OR_ECLAMPSIA	outcome	|| id:ebi-a-GCST90001606	Weighted median	6	0.113004	0.0891468	0.204935	-0.0617239	0.287731	1.11964	0.940142	1.3334
ebi-a-GCST90001606	gen_samplesize_1finngen_R9_O15_PRE_OR_ECLAMPSIA	outcome	|| id:ebi-a-GCST90001606	Weighted mode	6	0.112192	0.137692	0.452233	-0.157685	0.382069	1.11873	0.854119	1.46531
ebi-a-GCST90001607	gen_samplesize_1finngen_R9_O15_PRE_OR_ECLAMPSIA	outcome	|| id:ebi-a-GCST90001607	Inverse variance weighted (multiplicative random effects)	8	0.0941064	0.0701445	0.179723	-0.0433768	0.23159	1.09868	0.957551	1.2606
ebi-a-GCST90001607	gen_samplesize_1finngen_R9_O15_PRE_OR_ECLAMPSIA	outcome	|| id:ebi-a-GCST90001607	MR Egger	8	-0.209418	0.33857	0.558955	-0.873016	0.454179	0.811056	0.41769	1.57488
ebi-a-GCST90001607	gen_samplesize_1finngen_R9_O15_PRE_OR_ECLAMPSIA	outcome	|| id:ebi-a-GCST90001607	Weighted median	8	0.0616729	0.0694814	0.374746	-0.0745106	0.197856	1.06361	0.928198	1.21879
ebi-a-GCST90001607	gen_samplesize_1finngen_R9_O15_PRE_OR_ECLAMPSIA	outcome	|| id:ebi-a-GCST90001607	Weighted mode	8	0.0609162	0.0917925	0.528171	-0.118997	0.240829	1.06281	0.88781	1.2723
ebi-a-GCST90001608	gen_samplesize_1finngen_R9_O15_PRE_OR_ECLAMPSIA	outcome	|| id:ebi-a-GCST90001608	Inverse variance weighted	14	-0.0750466	0.0334937	0.0250508	-0.140694	-0.00939895	0.9277	0.868755	0.990645
ebi-a-GCST90001608	gen_samplesize_1finngen_R9_O15_PRE_OR_ECLAMPSIA	outcome	|| id:ebi-a-GCST90001608	MR Egger	14	-0.167212	0.080337	0.0594767	-0.324673	-0.00975174	0.84602	0.722764	0.990296
ebi-a-GCST90001608	gen_samplesize_1finngen_R9_O15_PRE_OR_ECLAMPSIA	outcome	|| id:ebi-a-GCST90001608	Weighted median	14	-0.0713304	0.0467897	0.127387	-0.163038	0.0203775	0.931154	0.849559	1.02059
ebi-a-GCST90001608	gen_samplesize_1finngen_R9_O15_PRE_OR_ECLAMPSIA	outcome	|| id:ebi-a-GCST90001608	Weighted mode	14	-0.0660703	0.0510476	0.218086	-0.166124	0.033983	0.936065	0.846942	1.03457
ebi-a-GCST90001609	gen_samplesize_1finngen_R9_O15_PRE_OR_ECLAMPSIA	outcome	|| id:ebi-a-GCST90001609	Inverse variance weighted	7	-0.0646729	0.0499749	0.195628	-0.162624	0.0332779	0.937374	0.849911	1.03384
ebi-a-GCST90001609	gen_samplesize_1finngen_R9_O15_PRE_OR_ECLAMPSIA	outcome	|| id:ebi-a-GCST90001609	MR Egger	7	0.0145002	0.133731	0.917873	-0.247613	0.276613	1.01461	0.780662	1.31866
ebi-a-GCST90001609	gen_samplesize_1finngen_R9_O15_PRE_OR_ECLAMPSIA	outcome	|| id:ebi-a-GCST90001609	Weighted median	7	-0.0569609	0.0533585	0.28574	-0.161544	0.0476217	0.944631	0.850829	1.04877
ebi-a-GCST90001609	gen_samplesize_1finngen_R9_O15_PRE_OR_ECLAMPSIA	outcome	|| id:ebi-a-GCST90001609	Weighted mode	7	-0.0358739	0.0609291	0.577486	-0.155295	0.0835471	0.964762	0.856163	1.08714
ebi-a-GCST90001610	gen_samplesize_1finngen_R9_O15_PRE_OR_ECLAMPSIA	outcome	|| id:ebi-a-GCST90001610	Inverse variance weighted	9	-0.0592003	0.0465164	0.203133	-0.150372	0.0319718	0.942518	0.860388	1.03249
ebi-a-GCST90001610	gen_samplesize_1finngen_R9_O15_PRE_OR_ECLAMPSIA	outcome	|| id:ebi-a-GCST90001610	MR Egger	9	0.0106435	0.104563	0.921777	-0.194299	0.215586	1.0107	0.823411	1.24059
ebi-a-GCST90001610	gen_samplesize_1finngen_R9_O15_PRE_OR_ECLAMPSIA	outcome	|| id:ebi-a-GCST90001610	Weighted median	9	-0.0182897	0.0511759	0.720801	-0.118594	0.0820151	0.981877	0.888168	1.08547
ebi-a-GCST90001610	gen_samplesize_1finngen_R9_O15_PRE_OR_ECLAMPSIA	outcome	|| id:ebi-a-GCST90001610	Weighted mode	9	-0.0393564	0.0523876	0.474017	-0.142036	0.0633232	0.961408	0.86759	1.06537
ebi-a-GCST90001611	gen_samplesize_1finngen_R9_O15_PRE_OR_ECLAMPSIA	outcome	|| id:ebi-a-GCST90001611	Inverse variance weighted	10	-0.0540534	0.0429796	0.208518	-0.138293	0.0301866	0.947382	0.870843	1.03065
ebi-a-GCST90001611	gen_samplesize_1finngen_R9_O15_PRE_OR_ECLAMPSIA	outcome	|| id:ebi-a-GCST90001611	MR Egger	10	0.00677967	0.0968265	0.945897	-0.183	0.19656	1.0068	0.832768	1.21721
ebi-a-GCST90001611	gen_samplesize_1finngen_R9_O15_PRE_OR_ECLAMPSIA	outcome	|| id:ebi-a-GCST90001611	Weighted median	10	-0.0181181	0.0499679	0.716908	-0.116055	0.079819	0.982045	0.890426	1.08309
ebi-a-GCST90001611	gen_samplesize_1finngen_R9_O15_PRE_OR_ECLAMPSIA	outcome	|| id:ebi-a-GCST90001611	Weighted mode	10	-0.0306422	0.0539075	0.583651	-0.136301	0.0750166	0.969823	0.87258	1.0779
ebi-a-GCST90001612	gen_samplesize_1finngen_R9_O15_PRE_OR_ECLAMPSIA	outcome	|| id:ebi-a-GCST90001612	Inverse variance weighted	11	-0.0256283	0.0380935	0.501091	-0.100292	0.049035	0.974697	0.904574	1.05026
ebi-a-GCST90001612	gen_samplesize_1finngen_R9_O15_PRE_OR_ECLAMPSIA	outcome	|| id:ebi-a-GCST90001612	MR Egger	11	-0.0107837	0.0821388	0.898437	-0.171776	0.150208	0.989274	0.842168	1.16208
ebi-a-GCST90001612	gen_samplesize_1finngen_R9_O15_PRE_OR_ECLAMPSIA	outcome	|| id:ebi-a-GCST90001612	Weighted median	11	-0.0161198	0.0515198	0.754367	-0.117099	0.084859	0.984009	0.889497	1.08856
ebi-a-GCST90001612	gen_samplesize_1finngen_R9_O15_PRE_OR_ECLAMPSIA	outcome	|| id:ebi-a-GCST90001612	Weighted mode	11	0.0159622	0.0613565	0.800022	-0.104297	0.136221	1.01609	0.900958	1.14594
ebi-a-GCST90001613	gen_samplesize_1finngen_R9_O15_PRE_OR_ECLAMPSIA	outcome	|| id:ebi-a-GCST90001613	Inverse variance weighted	12	-0.0125812	0.0163501	0.441605	-0.0446274	0.019465	0.987498	0.956354	1.01966
ebi-a-GCST90001613	gen_samplesize_1finngen_R9_O15_PRE_OR_ECLAMPSIA	outcome	|| id:ebi-a-GCST90001613	MR Egger	12	-0.0203681	0.0192663	0.315295	-0.0581301	0.0173939	0.979838	0.943527	1.01755
ebi-a-GCST90001613	gen_samplesize_1finngen_R9_O15_PRE_OR_ECLAMPSIA	outcome	|| id:ebi-a-GCST90001613	Weighted median	12	-0.0239111	0.0199719	0.231213	-0.0630561	0.0152338	0.976372	0.938891	1.01535
ebi-a-GCST90001613	gen_samplesize_1finngen_R9_O15_PRE_OR_ECLAMPSIA	outcome	|| id:ebi-a-GCST90001613	Weighted mode	12	-0.0226292	0.0188808	0.255896	-0.0596357	0.0143772	0.977625	0.942108	1.01448
ebi-a-GCST90001614	gen_samplesize_1finngen_R9_O15_PRE_OR_ECLAMPSIA	outcome	|| id:ebi-a-GCST90001614	Inverse variance weighted	8	0.0152266	0.0579196	0.792633	-0.0982957	0.128749	1.01534	0.906381	1.1374
ebi-a-GCST90001614	gen_samplesize_1finngen_R9_O15_PRE_OR_ECLAMPSIA	outcome	|| id:ebi-a-GCST90001614	MR Egger	8	-0.222185	0.161832	0.218874	-0.539375	0.0950057	0.800767	0.583112	1.09967
ebi-a-GCST90001614	gen_samplesize_1finngen_R9_O15_PRE_OR_ECLAMPSIA	outcome	|| id:ebi-a-GCST90001614	Weighted median	8	0.0410607	0.0627133	0.512638	-0.0818575	0.163979	1.04192	0.921403	1.17819
ebi-a-GCST90001614	gen_samplesize_1finngen_R9_O15_PRE_OR_ECLAMPSIA	outcome	|| id:ebi-a-GCST90001614	Weighted mode	8	0.0391802	0.0793462	0.636571	-0.116338	0.194699	1.03996	0.890174	1.21495
ebi-a-GCST90001615	gen_samplesize_1finngen_R9_O15_PRE_OR_ECLAMPSIA	outcome	|| id:ebi-a-GCST90001615	Inverse variance weighted	12	-0.0352957	0.0294607	0.230894	-0.0930388	0.0224473	0.96532	0.911158	1.0227
ebi-a-GCST90001615	gen_samplesize_1finngen_R9_O15_PRE_OR_ECLAMPSIA	outcome	|| id:ebi-a-GCST90001615	MR Egger	12	-0.0473411	0.0475501	0.342923	-0.140539	0.0458571	0.953762	0.86889	1.04692
ebi-a-GCST90001615	gen_samplesize_1finngen_R9_O15_PRE_OR_ECLAMPSIA	outcome	|| id:ebi-a-GCST90001615	Weighted median	12	-0.0290439	0.0374646	0.438201	-0.102475	0.0443868	0.971374	0.902601	1.04539
ebi-a-GCST90001615	gen_samplesize_1finngen_R9_O15_PRE_OR_ECLAMPSIA	outcome	|| id:ebi-a-GCST90001615	Weighted mode	12	-0.0265627	0.0371494	0.489492	-0.0993756	0.0462501	0.973787	0.905403	1.04734
ebi-a-GCST90001616	gen_samplesize_1finngen_R9_O15_PRE_OR_ECLAMPSIA	outcome	|| id:ebi-a-GCST90001616	Inverse variance weighted	9	-0.0271935	0.0175448	0.121154	-0.0615813	0.0071943	0.973173	0.940276	1.00722
ebi-a-GCST90001616	gen_samplesize_1finngen_R9_O15_PRE_OR_ECLAMPSIA	outcome	|| id:ebi-a-GCST90001616	MR Egger	9	-0.0185945	0.0202912	0.389945	-0.0583651	0.0211762	0.981577	0.943305	1.0214
ebi-a-GCST90001616	gen_samplesize_1finngen_R9_O15_PRE_OR_ECLAMPSIA	outcome	|| id:ebi-a-GCST90001616	Weighted median	9	-0.0237442	0.0203562	0.243438	-0.0636423	0.0161539	0.976536	0.938341	1.01629
ebi-a-GCST90001616	gen_samplesize_1finngen_R9_O15_PRE_OR_ECLAMPSIA	outcome	|| id:ebi-a-GCST90001616	Weighted mode	9	-0.0241087	0.0200242	0.26301	-0.0633561	0.0151388	0.97618	0.938609	1.01525
ebi-a-GCST90001617	gen_samplesize_1finngen_R9_O15_PRE_OR_ECLAMPSIA	outcome	|| id:ebi-a-GCST90001617	Inverse variance weighted	10	-0.0230664	0.0162917	0.156824	-0.0549982	0.0088654	0.977198	0.946487	1.0089
ebi-a-GCST90001617	gen_samplesize_1finngen_R9_O15_PRE_OR_ECLAMPSIA	outcome	|| id:ebi-a-GCST90001617	MR Egger	10	-0.0177484	0.0187244	0.370944	-0.0544483	0.0189515	0.982408	0.947007	1.01913
ebi-a-GCST90001617	gen_samplesize_1finngen_R9_O15_PRE_OR_ECLAMPSIA	outcome	|| id:ebi-a-GCST90001617	Weighted median	10	-0.0209856	0.0188028	0.264384	-0.0578392	0.0158679	0.979233	0.943802	1.01599
ebi-a-GCST90001617	gen_samplesize_1finngen_R9_O15_PRE_OR_ECLAMPSIA	outcome	|| id:ebi-a-GCST90001617	Weighted mode	10	-0.0207383	0.0173949	0.263666	-0.0548324	0.0133558	0.979475	0.946644	1.01345
ebi-a-GCST90001618	gen_samplesize_1finngen_R9_O15_PRE_OR_ECLAMPSIA	outcome	|| id:ebi-a-GCST90001618	Inverse variance weighted	20	-0.026549	0.0174085	0.127243	-0.0606697	0.00757158	0.9738	0.941134	1.0076
ebi-a-GCST90001618	gen_samplesize_1finngen_R9_O15_PRE_OR_ECLAMPSIA	outcome	|| id:ebi-a-GCST90001618	MR Egger	20	-0.0178228	0.0249902	0.484871	-0.0668035	0.0311579	0.982335	0.935379	1.03165
ebi-a-GCST90001618	gen_samplesize_1finngen_R9_O15_PRE_OR_ECLAMPSIA	outcome	|| id:ebi-a-GCST90001618	Weighted median	20	-0.0353114	0.0219695	0.10799	-0.0783717	0.00774878	0.965305	0.924621	1.00778
ebi-a-GCST90001618	gen_samplesize_1finngen_R9_O15_PRE_OR_ECLAMPSIA	outcome	|| id:ebi-a-GCST90001618	Weighted mode	20	-0.0327022	0.0196767	0.112929	-0.0712686	0.00586422	0.967827	0.931212	1.00588
ebi-a-GCST90001619	gen_samplesize_1finngen_R9_O15_PRE_OR_ECLAMPSIA	outcome	|| id:ebi-a-GCST90001619	Inverse variance weighted	16	0.00500881	0.0150167	0.738719	-0.0244239	0.0344415	1.00502	0.975872	1.03504
ebi-a-GCST90001619	gen_samplesize_1finngen_R9_O15_PRE_OR_ECLAMPSIA	outcome	|| id:ebi-a-GCST90001619	MR Egger	16	-0.00233662	0.020818	0.912226	-0.04314	0.0384667	0.997666	0.957777	1.03922
ebi-a-GCST90001619	gen_samplesize_1finngen_R9_O15_PRE_OR_ECLAMPSIA	outcome	|| id:ebi-a-GCST90001619	Weighted median	16	0.00667888	0.0197503	0.735237	-0.0320316	0.0453894	1.0067	0.968476	1.04644
ebi-a-GCST90001619	gen_samplesize_1finngen_R9_O15_PRE_OR_ECLAMPSIA	outcome	|| id:ebi-a-GCST90001619	Weighted mode	16	-0.00209692	0.0199237	0.917574	-0.0411473	0.0369535	0.997905	0.959688	1.03764
ebi-a-GCST90001620	gen_samplesize_1finngen_R9_O15_PRE_OR_ECLAMPSIA	outcome	|| id:ebi-a-GCST90001620	Inverse variance weighted	15	0.0160291	0.0167463	0.338478	-0.0167936	0.0488518	1.01616	0.983347	1.05006
ebi-a-GCST90001620	gen_samplesize_1finngen_R9_O15_PRE_OR_ECLAMPSIA	outcome	|| id:ebi-a-GCST90001620	MR Egger	15	0.0226648	0.0245224	0.372196	-0.0253992	0.0707288	1.02292	0.974921	1.07329
ebi-a-GCST90001620	gen_samplesize_1finngen_R9_O15_PRE_OR_ECLAMPSIA	outcome	|| id:ebi-a-GCST90001620	Weighted median	15	0.0320624	0.0254384	0.207528	-0.0177969	0.0819216	1.03258	0.98236	1.08537
ebi-a-GCST90001620	gen_samplesize_1finngen_R9_O15_PRE_OR_ECLAMPSIA	outcome	|| id:ebi-a-GCST90001620	Weighted mode	15	0.026986	0.0244599	0.288511	-0.0209554	0.0749274	1.02735	0.979263	1.07781
ebi-a-GCST90001621	gen_samplesize_1finngen_R9_O15_PRE_OR_ECLAMPSIA	outcome	|| id:ebi-a-GCST90001621	Inverse variance weighted	24	0.0134612	0.0245453	0.583401	-0.0346475	0.0615699	1.01355	0.965946	1.0635
ebi-a-GCST90001621	gen_samplesize_1finngen_R9_O15_PRE_OR_ECLAMPSIA	outcome	|| id:ebi-a-GCST90001621	MR Egger	24	0.00433988	0.0425323	0.919651	-0.0790234	0.0877032	1.00435	0.924018	1.09166
ebi-a-GCST90001621	gen_samplesize_1finngen_R9_O15_PRE_OR_ECLAMPSIA	outcome	|| id:ebi-a-GCST90001621	Weighted median	24	0.0152153	0.0336474	0.651126	-0.0507337	0.0811643	1.01533	0.950532	1.08455
ebi-a-GCST90001621	gen_samplesize_1finngen_R9_O15_PRE_OR_ECLAMPSIA	outcome	|| id:ebi-a-GCST90001621	Weighted mode	24	0.00905671	0.0347511	0.796707	-0.0590554	0.0771688	1.0091	0.942655	1.08022
ebi-a-GCST90001622	gen_samplesize_1finngen_R9_O15_PRE_OR_ECLAMPSIA	outcome	|| id:ebi-a-GCST90001622	Inverse variance weighted	23	-0.00399673	0.0323282	0.901608	-0.0673601	0.0593666	0.996011	0.934859	1.06116
ebi-a-GCST90001622	gen_samplesize_1finngen_R9_O15_PRE_OR_ECLAMPSIA	outcome	|| id:ebi-a-GCST90001622	MR Egger	23	-0.0765582	0.0597101	0.213759	-0.19359	0.0404736	0.926299	0.823996	1.0413
ebi-a-GCST90001622	gen_samplesize_1finngen_R9_O15_PRE_OR_ECLAMPSIA	outcome	|| id:ebi-a-GCST90001622	Weighted median	23	-0.0248065	0.0396331	0.531379	-0.102487	0.0528745	0.975499	0.90259	1.0543
ebi-a-GCST90001622	gen_samplesize_1finngen_R9_O15_PRE_OR_ECLAMPSIA	outcome	|| id:ebi-a-GCST90001622	Weighted mode	23	-0.0147399	0.0566198	0.797029	-0.125715	0.0962348	0.985368	0.881866	1.10102
ebi-a-GCST90001623	gen_samplesize_1finngen_R9_O15_PRE_OR_ECLAMPSIA	outcome	|| id:ebi-a-GCST90001623	Inverse variance weighted	20	0.00179474	0.0348947	0.95898	-0.0665989	0.0701883	1.0018	0.93557	1.07271
ebi-a-GCST90001623	gen_samplesize_1finngen_R9_O15_PRE_OR_ECLAMPSIA	outcome	|| id:ebi-a-GCST90001623	MR Egger	20	-0.0488602	0.0672097	0.476586	-0.180591	0.0828708	0.952314	0.834777	1.0864
ebi-a-GCST90001623	gen_samplesize_1finngen_R9_O15_PRE_OR_ECLAMPSIA	outcome	|| id:ebi-a-GCST90001623	Weighted median	20	0.0122205	0.0424054	0.773206	-0.0708941	0.0953352	1.0123	0.931561	1.10003
ebi-a-GCST90001623	gen_samplesize_1finngen_R9_O15_PRE_OR_ECLAMPSIA	outcome	|| id:ebi-a-GCST90001623	Weighted mode	20	0.00255793	0.052584	0.96171	-0.100507	0.105623	1.00256	0.904379	1.1114
ebi-a-GCST90001624	gen_samplesize_1finngen_R9_O15_PRE_OR_ECLAMPSIA	outcome	|| id:ebi-a-GCST90001624	Inverse variance weighted	12	0.0456317	0.0321593	0.15592	-0.0174005	0.108664	1.04669	0.98275	1.11479
ebi-a-GCST90001624	gen_samplesize_1finngen_R9_O15_PRE_OR_ECLAMPSIA	outcome	|| id:ebi-a-GCST90001624	MR Egger	12	0.0708265	0.0799756	0.396628	-0.0859257	0.227579	1.07339	0.917662	1.25556
ebi-a-GCST90001624	gen_samplesize_1finngen_R9_O15_PRE_OR_ECLAMPSIA	outcome	|| id:ebi-a-GCST90001624	Weighted median	12	0.060405	0.0471514	0.200164	-0.0320117	0.152822	1.06227	0.968495	1.16512
ebi-a-GCST90001624	gen_samplesize_1finngen_R9_O15_PRE_OR_ECLAMPSIA	outcome	|| id:ebi-a-GCST90001624	Weighted mode	12	0.119046	0.0871575	0.199254	-0.0517825	0.289875	1.12642	0.949535	1.33626
ebi-a-GCST90001625	gen_samplesize_1finngen_R9_O15_PRE_OR_ECLAMPSIA	outcome	|| id:ebi-a-GCST90001625	Inverse variance weighted	8	-0.00641655	0.0549447	0.907033	-0.114108	0.101275	0.993604	0.892161	1.10658
ebi-a-GCST90001625	gen_samplesize_1finngen_R9_O15_PRE_OR_ECLAMPSIA	outcome	|| id:ebi-a-GCST90001625	MR Egger	8	-0.060533	0.136165	0.672227	-0.327417	0.206351	0.941263	0.720783	1.22918
ebi-a-GCST90001625	gen_samplesize_1finngen_R9_O15_PRE_OR_ECLAMPSIA	outcome	|| id:ebi-a-GCST90001625	Weighted median	8	-0.0387513	0.0599446	0.517987	-0.156243	0.0787401	0.96199	0.855352	1.08192
ebi-a-GCST90001625	gen_samplesize_1finngen_R9_O15_PRE_OR_ECLAMPSIA	outcome	|| id:ebi-a-GCST90001625	Weighted mode	8	-0.0479899	0.065905	0.490146	-0.177164	0.0811838	0.953143	0.837643	1.08457
ebi-a-GCST90001626	gen_samplesize_1finngen_R9_O15_PRE_OR_ECLAMPSIA	outcome	|| id:ebi-a-GCST90001626	Inverse variance weighted	12	0.00198673	0.0390753	0.95945	-0.0746009	0.0785744	1.00199	0.928114	1.08174
ebi-a-GCST90001626	gen_samplesize_1finngen_R9_O15_PRE_OR_ECLAMPSIA	outcome	|| id:ebi-a-GCST90001626	MR Egger	12	-0.0934885	0.0825304	0.283737	-0.255248	0.0682711	0.910748	0.774724	1.07066
ebi-a-GCST90001626	gen_samplesize_1finngen_R9_O15_PRE_OR_ECLAMPSIA	outcome	|| id:ebi-a-GCST90001626	Weighted median	12	-0.0280262	0.0496296	0.572273	-0.1253	0.0692479	0.972363	0.882232	1.0717
ebi-a-GCST90001626	gen_samplesize_1finngen_R9_O15_PRE_OR_ECLAMPSIA	outcome	|| id:ebi-a-GCST90001626	Weighted mode	12	-0.0666439	0.0582857	0.277146	-0.180884	0.0475961	0.935528	0.834532	1.04875
ebi-a-GCST90001627	gen_samplesize_1finngen_R9_O15_PRE_OR_ECLAMPSIA	outcome	|| id:ebi-a-GCST90001627	Inverse variance weighted (multiplicative random effects)	23	-0.00716677	0.0247569	0.77221	-0.0556903	0.0413568	0.992859	0.945832	1.04222
ebi-a-GCST90001627	gen_samplesize_1finngen_R9_O15_PRE_OR_ECLAMPSIA	outcome	|| id:ebi-a-GCST90001627	MR Egger	23	-0.0602664	0.038384	0.13134	-0.135499	0.0149662	0.941514	0.87328	1.01508
ebi-a-GCST90001627	gen_samplesize_1finngen_R9_O15_PRE_OR_ECLAMPSIA	outcome	|| id:ebi-a-GCST90001627	Weighted median	23	-0.0431515	0.0277051	0.119345	-0.0974535	0.0111505	0.957766	0.907145	1.01121
ebi-a-GCST90001627	gen_samplesize_1finngen_R9_O15_PRE_OR_ECLAMPSIA	outcome	|| id:ebi-a-GCST90001627	Weighted mode	23	-0.0402004	0.0257808	0.133191	-0.0907307	0.0103299	0.960597	0.913264	1.01038
ebi-a-GCST90001628	gen_samplesize_1finngen_R9_O15_PRE_OR_ECLAMPSIA	outcome	|| id:ebi-a-GCST90001628	Inverse variance weighted	21	-0.00715321	0.0162072	0.658952	-0.0389193	0.0246128	0.992872	0.961828	1.02492
ebi-a-GCST90001628	gen_samplesize_1finngen_R9_O15_PRE_OR_ECLAMPSIA	outcome	|| id:ebi-a-GCST90001628	MR Egger	21	-0.0165603	0.0214803	0.450215	-0.0586616	0.025541	0.983576	0.943026	1.02587
ebi-a-GCST90001628	gen_samplesize_1finngen_R9_O15_PRE_OR_ECLAMPSIA	outcome	|| id:ebi-a-GCST90001628	Weighted median	21	-0.00868478	0.0193156	0.652981	-0.0465434	0.0291738	0.991353	0.954523	1.0296
ebi-a-GCST90001628	gen_samplesize_1finngen_R9_O15_PRE_OR_ECLAMPSIA	outcome	|| id:ebi-a-GCST90001628	Weighted mode	21	-0.0128574	0.0168542	0.454454	-0.0458917	0.0201769	0.987225	0.955145	1.02038
ebi-a-GCST90001629	gen_samplesize_1finngen_R9_O15_PRE_OR_ECLAMPSIA	outcome	|| id:ebi-a-GCST90001629	Inverse variance weighted	19	-0.00279232	0.0246844	0.909935	-0.0511738	0.0455891	0.997212	0.950114	1.04664
ebi-a-GCST90001629	gen_samplesize_1finngen_R9_O15_PRE_OR_ECLAMPSIA	outcome	|| id:ebi-a-GCST90001629	MR Egger	19	-0.00835095	0.0393025	0.83426	-0.0853838	0.0686819	0.991684	0.91816	1.0711
ebi-a-GCST90001629	gen_samplesize_1finngen_R9_O15_PRE_OR_ECLAMPSIA	outcome	|| id:ebi-a-GCST90001629	Weighted median	19	-0.0201372	0.0291302	0.489389	-0.0772324	0.036958	0.980064	0.925675	1.03765
ebi-a-GCST90001629	gen_samplesize_1finngen_R9_O15_PRE_OR_ECLAMPSIA	outcome	|| id:ebi-a-GCST90001629	Weighted mode	19	-0.0150993	0.02618	0.571252	-0.0664121	0.0362135	0.985014	0.935745	1.03688
ebi-a-GCST90001630	gen_samplesize_1finngen_R9_O15_PRE_OR_ECLAMPSIA	outcome	|| id:ebi-a-GCST90001630	Inverse variance weighted	14	0.0140947	0.0476332	0.767306	-0.0792664	0.107456	1.01419	0.923794	1.11344
ebi-a-GCST90001630	gen_samplesize_1finngen_R9_O15_PRE_OR_ECLAMPSIA	outcome	|| id:ebi-a-GCST90001630	MR Egger	14	0.0858839	0.108158	0.442579	-0.126105	0.297873	1.08968	0.881522	1.34699
ebi-a-GCST90001630	gen_samplesize_1finngen_R9_O15_PRE_OR_ECLAMPSIA	outcome	|| id:ebi-a-GCST90001630	Weighted median	14	0.0584597	0.0553953	0.291279	-0.0501151	0.167035	1.0602	0.95112	1.1818
ebi-a-GCST90001630	gen_samplesize_1finngen_R9_O15_PRE_OR_ECLAMPSIA	outcome	|| id:ebi-a-GCST90001630	Weighted mode	14	0.0687005	0.0708144	0.349677	-0.0700958	0.207497	1.07112	0.932305	1.23059
ebi-a-GCST90001631	gen_samplesize_1finngen_R9_O15_PRE_OR_ECLAMPSIA	outcome	|| id:ebi-a-GCST90001631	Inverse variance weighted	15	0.0442612	0.0465638	0.341833	-0.0470038	0.135526	1.04526	0.954084	1.14514
ebi-a-GCST90001631	gen_samplesize_1finngen_R9_O15_PRE_OR_ECLAMPSIA	outcome	|| id:ebi-a-GCST90001631	MR Egger	15	0.0938925	0.0987442	0.359017	-0.0996462	0.287431	1.09844	0.905158	1.333
ebi-a-GCST90001631	gen_samplesize_1finngen_R9_O15_PRE_OR_ECLAMPSIA	outcome	|| id:ebi-a-GCST90001631	Weighted median	15	0.0461892	0.061859	0.455254	-0.0750545	0.167433	1.04727	0.927693	1.18227
ebi-a-GCST90001631	gen_samplesize_1finngen_R9_O15_PRE_OR_ECLAMPSIA	outcome	|| id:ebi-a-GCST90001631	Weighted mode	15	0.0480479	0.0811465	0.563216	-0.110999	0.207095	1.04922	0.894939	1.2301
ebi-a-GCST90001632	gen_samplesize_1finngen_R9_O15_PRE_OR_ECLAMPSIA	outcome	|| id:ebi-a-GCST90001632	Inverse variance weighted	13	0.0689908	0.0506694	0.173328	-0.0303213	0.168303	1.07143	0.970134	1.18329
ebi-a-GCST90001632	gen_samplesize_1finngen_R9_O15_PRE_OR_ECLAMPSIA	outcome	|| id:ebi-a-GCST90001632	MR Egger	13	0.10324	0.108344	0.361114	-0.109114	0.315593	1.10876	0.896629	1.37107
ebi-a-GCST90001632	gen_samplesize_1finngen_R9_O15_PRE_OR_ECLAMPSIA	outcome	|| id:ebi-a-GCST90001632	Weighted median	13	0.0668521	0.0585133	0.253242	-0.047834	0.181538	1.06914	0.953292	1.19906
ebi-a-GCST90001632	gen_samplesize_1finngen_R9_O15_PRE_OR_ECLAMPSIA	outcome	|| id:ebi-a-GCST90001632	Weighted mode	13	0.0567904	0.0818384	0.500937	-0.103613	0.217194	1.05843	0.901574	1.24258
ebi-a-GCST90001633	gen_samplesize_1finngen_R9_O15_PRE_OR_ECLAMPSIA	outcome	|| id:ebi-a-GCST90001633	Inverse variance weighted	18	-0.0100139	0.026091	0.70112	-0.0611522	0.0411244	0.990036	0.94068	1.04198
ebi-a-GCST90001633	gen_samplesize_1finngen_R9_O15_PRE_OR_ECLAMPSIA	outcome	|| id:ebi-a-GCST90001633	MR Egger	18	0.00874244	0.042206	0.838516	-0.0739813	0.0914662	1.00878	0.928689	1.09578
ebi-a-GCST90001633	gen_samplesize_1finngen_R9_O15_PRE_OR_ECLAMPSIA	outcome	|| id:ebi-a-GCST90001633	Weighted median	18	0.00422791	0.0343002	0.9019	-0.0630005	0.0714563	1.00424	0.938943	1.07407
ebi-a-GCST90001633	gen_samplesize_1finngen_R9_O15_PRE_OR_ECLAMPSIA	outcome	|| id:ebi-a-GCST90001633	Weighted mode	18	0.00476845	0.0369658	0.898875	-0.0676846	0.0772215	1.00478	0.934555	1.08028
ebi-a-GCST90001634	gen_samplesize_1finngen_R9_O15_PRE_OR_ECLAMPSIA	outcome	|| id:ebi-a-GCST90001634	Inverse variance weighted	13	-0.035849	0.0276218	0.194338	-0.0899877	0.0182897	0.964786	0.913942	1.01846
ebi-a-GCST90001634	gen_samplesize_1finngen_R9_O15_PRE_OR_ECLAMPSIA	outcome	|| id:ebi-a-GCST90001634	MR Egger	13	-0.036184	0.0498768	0.483315	-0.133943	0.0615746	0.964463	0.87464	1.06351
ebi-a-GCST90001634	gen_samplesize_1finngen_R9_O15_PRE_OR_ECLAMPSIA	outcome	|| id:ebi-a-GCST90001634	Weighted median	13	-0.0304235	0.0383828	0.427991	-0.105654	0.0448067	0.970035	0.899736	1.04583
ebi-a-GCST90001634	gen_samplesize_1finngen_R9_O15_PRE_OR_ECLAMPSIA	outcome	|| id:ebi-a-GCST90001634	Weighted mode	13	-0.0266685	0.0420206	0.537567	-0.109029	0.0556919	0.973684	0.896704	1.05727
ebi-a-GCST90001635	gen_samplesize_1finngen_R9_O15_PRE_OR_ECLAMPSIA	outcome	|| id:ebi-a-GCST90001635	Inverse variance weighted	14	-0.0143258	0.0283204	0.612963	-0.0698338	0.0411822	0.985776	0.932549	1.04204
ebi-a-GCST90001635	gen_samplesize_1finngen_R9_O15_PRE_OR_ECLAMPSIA	outcome	|| id:ebi-a-GCST90001635	MR Egger	14	0.0116331	0.0539128	0.832786	-0.094036	0.117302	1.0117	0.91025	1.12446
ebi-a-GCST90001635	gen_samplesize_1finngen_R9_O15_PRE_OR_ECLAMPSIA	outcome	|| id:ebi-a-GCST90001635	Weighted median	14	-0.0276995	0.0380259	0.466345	-0.10223	0.0468312	0.972681	0.902822	1.04795
ebi-a-GCST90001635	gen_samplesize_1finngen_R9_O15_PRE_OR_ECLAMPSIA	outcome	|| id:ebi-a-GCST90001635	Weighted mode	14	-0.0240981	0.0404385	0.561461	-0.103357	0.0551613	0.97619	0.901805	1.05671
ebi-a-GCST90001636	gen_samplesize_1finngen_R9_O15_PRE_OR_ECLAMPSIA	outcome	|| id:ebi-a-GCST90001636	Inverse variance weighted	6	-0.0610176	0.0528222	0.248029	-0.164549	0.0425139	0.940807	0.848276	1.04343
ebi-a-GCST90001636	gen_samplesize_1finngen_R9_O15_PRE_OR_ECLAMPSIA	outcome	|| id:ebi-a-GCST90001636	MR Egger	6	0.172058	0.21625	0.470785	-0.251792	0.595908	1.18775	0.777407	1.81468
ebi-a-GCST90001636	gen_samplesize_1finngen_R9_O15_PRE_OR_ECLAMPSIA	outcome	|| id:ebi-a-GCST90001636	Weighted median	6	-0.0611494	0.0650981	0.347555	-0.188742	0.0664429	0.940683	0.828	1.0687
ebi-a-GCST90001636	gen_samplesize_1finngen_R9_O15_PRE_OR_ECLAMPSIA	outcome	|| id:ebi-a-GCST90001636	Weighted mode	6	-0.0889949	0.0854804	0.345523	-0.256537	0.0785467	0.91485	0.773727	1.08171
ebi-a-GCST90001637	gen_samplesize_1finngen_R9_O15_PRE_OR_ECLAMPSIA	outcome	|| id:ebi-a-GCST90001637	Inverse variance weighted	19	-0.0437714	0.0280389	0.118501	-0.0987276	0.0111848	0.957173	0.905989	1.01125
ebi-a-GCST90001637	gen_samplesize_1finngen_R9_O15_PRE_OR_ECLAMPSIA	outcome	|| id:ebi-a-GCST90001637	MR Egger	19	-0.0227171	0.0517667	0.666307	-0.12418	0.0787457	0.977539	0.883221	1.08193
ebi-a-GCST90001637	gen_samplesize_1finngen_R9_O15_PRE_OR_ECLAMPSIA	outcome	|| id:ebi-a-GCST90001637	Weighted median	19	-0.0249852	0.0376744	0.50721	-0.098827	0.0488566	0.975324	0.905899	1.05007
ebi-a-GCST90001637	gen_samplesize_1finngen_R9_O15_PRE_OR_ECLAMPSIA	outcome	|| id:ebi-a-GCST90001637	Weighted mode	19	-0.0205895	0.0401555	0.614365	-0.0992943	0.0581152	0.979621	0.905476	1.05984
ebi-a-GCST90001638	gen_samplesize_1finngen_R9_O15_PRE_OR_ECLAMPSIA	outcome	|| id:ebi-a-GCST90001638	Inverse variance weighted	19	-0.0317863	0.0287604	0.269067	-0.0881567	0.024584	0.968714	0.915617	1.02489
ebi-a-GCST90001638	gen_samplesize_1finngen_R9_O15_PRE_OR_ECLAMPSIA	outcome	|| id:ebi-a-GCST90001638	MR Egger	19	-0.00920146	0.0571674	0.874025	-0.12125	0.102847	0.990841	0.885813	1.10832
ebi-a-GCST90001638	gen_samplesize_1finngen_R9_O15_PRE_OR_ECLAMPSIA	outcome	|| id:ebi-a-GCST90001638	Weighted median	19	-0.0229559	0.0365825	0.530324	-0.0946575	0.0487457	0.977306	0.909684	1.04995
ebi-a-GCST90001638	gen_samplesize_1finngen_R9_O15_PRE_OR_ECLAMPSIA	outcome	|| id:ebi-a-GCST90001638	Weighted mode	19	-0.0261038	0.0396242	0.518373	-0.103767	0.0515596	0.974234	0.901435	1.05291
ebi-a-GCST90001639	gen_samplesize_1finngen_R9_O15_PRE_OR_ECLAMPSIA	outcome	|| id:ebi-a-GCST90001639	Inverse variance weighted	12	-0.0418462	0.0458215	0.361115	-0.131656	0.047964	0.959017	0.876642	1.04913
ebi-a-GCST90001639	gen_samplesize_1finngen_R9_O15_PRE_OR_ECLAMPSIA	outcome	|| id:ebi-a-GCST90001639	MR Egger	12	-0.0657758	0.0932788	0.496812	-0.248602	0.117051	0.936341	0.77989	1.12418
ebi-a-GCST90001639	gen_samplesize_1finngen_R9_O15_PRE_OR_ECLAMPSIA	outcome	|| id:ebi-a-GCST90001639	Weighted median	12	-0.0775016	0.0534945	0.1474	-0.182351	0.0273475	0.925426	0.833309	1.02772
ebi-a-GCST90001639	gen_samplesize_1finngen_R9_O15_PRE_OR_ECLAMPSIA	outcome	|| id:ebi-a-GCST90001639	Weighted mode	12	-0.0773477	0.0653053	0.261215	-0.205346	0.0506506	0.925568	0.814366	1.05196
ebi-a-GCST90001640	gen_samplesize_1finngen_R9_O15_PRE_OR_ECLAMPSIA	outcome	|| id:ebi-a-GCST90001640	Inverse variance weighted	3	-0.168497	0.0954414	0.0774883	-0.355562	0.0185682	0.844934	0.700779	1.01874
ebi-a-GCST90001640	gen_samplesize_1finngen_R9_O15_PRE_OR_ECLAMPSIA	outcome	|| id:ebi-a-GCST90001640	MR Egger	3	-0.712077	1.57782	0.730112	-3.8046	2.38045	0.490624	0.0222681	10.8097
ebi-a-GCST90001640	gen_samplesize_1finngen_R9_O15_PRE_OR_ECLAMPSIA	outcome	|| id:ebi-a-GCST90001640	Weighted median	3	-0.147949	0.111408	0.184181	-0.36631	0.0704111	0.862475	0.693288	1.07295
ebi-a-GCST90001640	gen_samplesize_1finngen_R9_O15_PRE_OR_ECLAMPSIA	outcome	|| id:ebi-a-GCST90001640	Weighted mode	3	-0.146416	0.117708	0.339557	-0.377123	0.0842914	0.863799	0.685832	1.08795
ebi-a-GCST90001641	gen_samplesize_1finngen_R9_O15_PRE_OR_ECLAMPSIA	outcome	|| id:ebi-a-GCST90001641	Inverse variance weighted	8	-0.0272162	0.0466021	0.559212	-0.118556	0.064124	0.973151	0.888202	1.06622
ebi-a-GCST90001641	gen_samplesize_1finngen_R9_O15_PRE_OR_ECLAMPSIA	outcome	|| id:ebi-a-GCST90001641	MR Egger	8	-0.0506485	0.138772	0.727648	-0.322641	0.221344	0.950613	0.724234	1.24775
ebi-a-GCST90001641	gen_samplesize_1finngen_R9_O15_PRE_OR_ECLAMPSIA	outcome	|| id:ebi-a-GCST90001641	Weighted median	8	-0.0322141	0.0583685	0.581011	-0.146616	0.0821882	0.968299	0.863625	1.08566
ebi-a-GCST90001641	gen_samplesize_1finngen_R9_O15_PRE_OR_ECLAMPSIA	outcome	|| id:ebi-a-GCST90001641	Weighted mode	8	-0.0717162	0.0857212	0.430436	-0.23973	0.0962973	0.930795	0.786841	1.10109
ebi-a-GCST90001642	gen_samplesize_1finngen_R9_O15_PRE_OR_ECLAMPSIA	outcome	|| id:ebi-a-GCST90001642	Inverse variance weighted	14	-0.0101745	0.030502	0.738704	-0.0699584	0.0496094	0.989877	0.932433	1.05086
ebi-a-GCST90001642	gen_samplesize_1finngen_R9_O15_PRE_OR_ECLAMPSIA	outcome	|| id:ebi-a-GCST90001642	MR Egger	14	-0.020848	0.0511813	0.690933	-0.121163	0.0794674	0.979368	0.885889	1.08271
ebi-a-GCST90001642	gen_samplesize_1finngen_R9_O15_PRE_OR_ECLAMPSIA	outcome	|| id:ebi-a-GCST90001642	Weighted median	14	-0.0242511	0.0413926	0.557955	-0.105381	0.0568783	0.976041	0.899982	1.05853
ebi-a-GCST90001642	gen_samplesize_1finngen_R9_O15_PRE_OR_ECLAMPSIA	outcome	|| id:ebi-a-GCST90001642	Weighted mode	14	-0.0201319	0.0416567	0.636934	-0.101779	0.0615152	0.980069	0.903229	1.06345
ebi-a-GCST90001643	gen_samplesize_1finngen_R9_O15_PRE_OR_ECLAMPSIA	outcome	|| id:ebi-a-GCST90001643	Inverse variance weighted	20	0.0259929	0.0151132	0.0854547	-0.00362902	0.0556148	1.02633	0.996378	1.05719
ebi-a-GCST90001643	gen_samplesize_1finngen_R9_O15_PRE_OR_ECLAMPSIA	outcome	|| id:ebi-a-GCST90001643	MR Egger	20	0.0207666	0.0190516	0.290084	-0.0165746	0.0581077	1.02098	0.983562	1.05983
ebi-a-GCST90001643	gen_samplesize_1finngen_R9_O15_PRE_OR_ECLAMPSIA	outcome	|| id:ebi-a-GCST90001643	Weighted median	20	0.0157788	0.0175506	0.368628	-0.0186204	0.0501779	1.0159	0.981552	1.05146
ebi-a-GCST90001643	gen_samplesize_1finngen_R9_O15_PRE_OR_ECLAMPSIA	outcome	|| id:ebi-a-GCST90001643	Weighted mode	20	0.0120913	0.015413	0.442425	-0.0181181	0.0423007	1.01216	0.982045	1.04321
ebi-a-GCST90001644	gen_samplesize_1finngen_R9_O15_PRE_OR_ECLAMPSIA	outcome	|| id:ebi-a-GCST90001644	Inverse variance weighted	22	-0.0193496	0.0224458	0.388654	-0.0633434	0.0246441	0.980836	0.938621	1.02495
ebi-a-GCST90001644	gen_samplesize_1finngen_R9_O15_PRE_OR_ECLAMPSIA	outcome	|| id:ebi-a-GCST90001644	MR Egger	22	-0.0269794	0.0372753	0.477577	-0.100039	0.0460802	0.973381	0.904802	1.04716
ebi-a-GCST90001644	gen_samplesize_1finngen_R9_O15_PRE_OR_ECLAMPSIA	outcome	|| id:ebi-a-GCST90001644	Weighted median	22	-0.02485	0.031126	0.424658	-0.085857	0.036157	0.975456	0.917725	1.03682
ebi-a-GCST90001644	gen_samplesize_1finngen_R9_O15_PRE_OR_ECLAMPSIA	outcome	|| id:ebi-a-GCST90001644	Weighted mode	22	-0.0156395	0.0342799	0.652908	-0.082828	0.0515491	0.984482	0.920509	1.0529
ebi-a-GCST90001645	gen_samplesize_1finngen_R9_O15_PRE_OR_ECLAMPSIA	outcome	|| id:ebi-a-GCST90001645	Inverse variance weighted (multiplicative random effects)	15	0.027072	0.0477705	0.570912	-0.0665583	0.120702	1.02744	0.935608	1.12829
ebi-a-GCST90001645	gen_samplesize_1finngen_R9_O15_PRE_OR_ECLAMPSIA	outcome	|| id:ebi-a-GCST90001645	MR Egger	15	-0.151516	0.0773287	0.0718682	-0.30308	4.81669e-05	0.859404	0.73854	1.00005
ebi-a-GCST90001645	gen_samplesize_1finngen_R9_O15_PRE_OR_ECLAMPSIA	outcome	|| id:ebi-a-GCST90001645	Weighted median	15	-0.0221709	0.0458025	0.628348	-0.111944	0.0676021	0.978073	0.894095	1.06994
ebi-a-GCST90001645	gen_samplesize_1finngen_R9_O15_PRE_OR_ECLAMPSIA	outcome	|| id:ebi-a-GCST90001645	Weighted mode	15	-0.0313641	0.0469565	0.515033	-0.123399	0.0606706	0.969123	0.883911	1.06255
ebi-a-GCST90001646	gen_samplesize_1finngen_R9_O15_PRE_OR_ECLAMPSIA	outcome	|| id:ebi-a-GCST90001646	Inverse variance weighted	23	-0.0226325	0.0146412	0.122149	-0.0513292	0.00606417	0.977622	0.949966	1.00608
ebi-a-GCST90001646	gen_samplesize_1finngen_R9_O15_PRE_OR_ECLAMPSIA	outcome	|| id:ebi-a-GCST90001646	MR Egger	23	-0.0191309	0.0193788	0.33478	-0.0571133	0.0188515	0.981051	0.944487	1.01903
ebi-a-GCST90001646	gen_samplesize_1finngen_R9_O15_PRE_OR_ECLAMPSIA	outcome	|| id:ebi-a-GCST90001646	Weighted median	23	-0.0120345	0.0185306	0.516055	-0.0483544	0.0242855	0.988038	0.952796	1.02458
ebi-a-GCST90001646	gen_samplesize_1finngen_R9_O15_PRE_OR_ECLAMPSIA	outcome	|| id:ebi-a-GCST90001646	Weighted mode	23	-0.0102122	0.0166295	0.545447	-0.042806	0.0223816	0.98984	0.958097	1.02263
ebi-a-GCST90001647	gen_samplesize_1finngen_R9_O15_PRE_OR_ECLAMPSIA	outcome	|| id:ebi-a-GCST90001647	Inverse variance weighted	15	-0.0274297	0.0205505	0.18196	-0.0677087	0.0128493	0.972943	0.934533	1.01293
ebi-a-GCST90001647	gen_samplesize_1finngen_R9_O15_PRE_OR_ECLAMPSIA	outcome	|| id:ebi-a-GCST90001647	MR Egger	15	-0.0158111	0.0278907	0.580443	-0.0704768	0.0388547	0.984313	0.931949	1.03962
ebi-a-GCST90001647	gen_samplesize_1finngen_R9_O15_PRE_OR_ECLAMPSIA	outcome	|| id:ebi-a-GCST90001647	Weighted median	15	-0.0104501	0.0268274	0.696882	-0.0630318	0.0421315	0.989604	0.938914	1.04303
ebi-a-GCST90001647	gen_samplesize_1finngen_R9_O15_PRE_OR_ECLAMPSIA	outcome	|| id:ebi-a-GCST90001647	Weighted mode	15	-0.0184241	0.0246468	0.467117	-0.0667319	0.0298836	0.981745	0.935446	1.03033
ebi-a-GCST90001648	gen_samplesize_1finngen_R9_O15_PRE_OR_ECLAMPSIA	outcome	|| id:ebi-a-GCST90001648	Inverse variance weighted	7	0.0546687	0.0469463	0.244223	-0.037346	0.146683	1.05619	0.963343	1.15799
ebi-a-GCST90001648	gen_samplesize_1finngen_R9_O15_PRE_OR_ECLAMPSIA	outcome	|| id:ebi-a-GCST90001648	MR Egger	7	0.111136	0.0684929	0.165603	-0.0231098	0.245382	1.11755	0.977155	1.27811
ebi-a-GCST90001648	gen_samplesize_1finngen_R9_O15_PRE_OR_ECLAMPSIA	outcome	|| id:ebi-a-GCST90001648	Weighted median	7	0.080468	0.038111	0.034737	0.00577045	0.155166	1.08379	1.00579	1.16785
ebi-a-GCST90001648	gen_samplesize_1finngen_R9_O15_PRE_OR_ECLAMPSIA	outcome	|| id:ebi-a-GCST90001648	Weighted mode	7	0.0848012	0.039223	0.0738702	0.00792403	0.161678	1.0885	1.00796	1.17548
ebi-a-GCST90001649	gen_samplesize_1finngen_R9_O15_PRE_OR_ECLAMPSIA	outcome	|| id:ebi-a-GCST90001649	Inverse variance weighted	17	0.0277724	0.0230031	0.227304	-0.0173136	0.0728583	1.02816	0.982835	1.07558
ebi-a-GCST90001649	gen_samplesize_1finngen_R9_O15_PRE_OR_ECLAMPSIA	outcome	|| id:ebi-a-GCST90001649	MR Egger	17	0.0334371	0.0388073	0.402461	-0.0426251	0.109499	1.034	0.958271	1.11572
ebi-a-GCST90001649	gen_samplesize_1finngen_R9_O15_PRE_OR_ECLAMPSIA	outcome	|| id:ebi-a-GCST90001649	Weighted median	17	0.0440553	0.0321232	0.170234	-0.018906	0.107017	1.04504	0.981272	1.11295
ebi-a-GCST90001649	gen_samplesize_1finngen_R9_O15_PRE_OR_ECLAMPSIA	outcome	|| id:ebi-a-GCST90001649	Weighted mode	17	0.0488158	0.0321678	0.148641	-0.014233	0.111865	1.05003	0.985868	1.11836
ebi-a-GCST90001650	gen_samplesize_1finngen_R9_O15_PRE_OR_ECLAMPSIA	outcome	|| id:ebi-a-GCST90001650	Inverse variance weighted	14	0.0664388	0.026852	0.0133514	0.0138088	0.119069	1.0687	1.0139	1.12645
ebi-a-GCST90001650	gen_samplesize_1finngen_R9_O15_PRE_OR_ECLAMPSIA	outcome	|| id:ebi-a-GCST90001650	MR Egger	14	0.119332	0.0426879	0.01618	0.035664	0.203001	1.12674	1.03631	1.22507
ebi-a-GCST90001650	gen_samplesize_1finngen_R9_O15_PRE_OR_ECLAMPSIA	outcome	|| id:ebi-a-GCST90001650	Weighted median	14	0.0772865	0.0352345	0.0282724	0.00822678	0.146346	1.08035	1.00826	1.1576
ebi-a-GCST90001650	gen_samplesize_1finngen_R9_O15_PRE_OR_ECLAMPSIA	outcome	|| id:ebi-a-GCST90001650	Weighted mode	14	0.0823731	0.037842	0.0485224	0.00820265	0.156543	1.08586	1.00824	1.16946
ebi-a-GCST90001651	gen_samplesize_1finngen_R9_O15_PRE_OR_ECLAMPSIA	outcome	|| id:ebi-a-GCST90001651	Inverse variance weighted	14	-0.00145843	0.0335353	0.965311	-0.0671876	0.0642708	0.998543	0.93502	1.06638
ebi-a-GCST90001651	gen_samplesize_1finngen_R9_O15_PRE_OR_ECLAMPSIA	outcome	|| id:ebi-a-GCST90001651	MR Egger	14	0.0331186	0.0591635	0.585926	-0.0828418	0.149079	1.03367	0.920497	1.16076
ebi-a-GCST90001651	gen_samplesize_1finngen_R9_O15_PRE_OR_ECLAMPSIA	outcome	|| id:ebi-a-GCST90001651	Weighted median	14	-0.0186736	0.0483447	0.699304	-0.113429	0.076082	0.9815	0.892767	1.07905
ebi-a-GCST90001651	gen_samplesize_1finngen_R9_O15_PRE_OR_ECLAMPSIA	outcome	|| id:ebi-a-GCST90001651	Weighted mode	14	-0.017572	0.0525883	0.743601	-0.120645	0.085501	0.982582	0.886349	1.08926
ebi-a-GCST90001652	gen_samplesize_1finngen_R9_O15_PRE_OR_ECLAMPSIA	outcome	|| id:ebi-a-GCST90001652	Inverse variance weighted	11	0.00549015	0.0480636	0.909058	-0.0887144	0.0996947	1.00551	0.915107	1.10483
ebi-a-GCST90001652	gen_samplesize_1finngen_R9_O15_PRE_OR_ECLAMPSIA	outcome	|| id:ebi-a-GCST90001652	MR Egger	11	0.0928424	0.179102	0.616697	-0.258197	0.443882	1.09729	0.772443	1.55875
ebi-a-GCST90001652	gen_samplesize_1finngen_R9_O15_PRE_OR_ECLAMPSIA	outcome	|| id:ebi-a-GCST90001652	Weighted median	11	-0.0370661	0.0604912	0.540041	-0.155629	0.0814967	0.963612	0.855877	1.08491
ebi-a-GCST90001652	gen_samplesize_1finngen_R9_O15_PRE_OR_ECLAMPSIA	outcome	|| id:ebi-a-GCST90001652	Weighted mode	11	-0.0509304	0.0818767	0.547836	-0.211409	0.109548	0.950345	0.809443	1.11577
ebi-a-GCST90001653	gen_samplesize_1finngen_R9_O15_PRE_OR_ECLAMPSIA	outcome	|| id:ebi-a-GCST90001653	Inverse variance weighted	14	-0.00105749	0.0221218	0.961873	-0.0444161	0.0423011	0.998943	0.956556	1.04321
ebi-a-GCST90001653	gen_samplesize_1finngen_R9_O15_PRE_OR_ECLAMPSIA	outcome	|| id:ebi-a-GCST90001653	MR Egger	14	-0.020782	0.0298149	0.499064	-0.0792192	0.0376553	0.979432	0.923837	1.03837
ebi-a-GCST90001653	gen_samplesize_1finngen_R9_O15_PRE_OR_ECLAMPSIA	outcome	|| id:ebi-a-GCST90001653	Weighted median	14	0.00501522	0.0301684	0.867967	-0.0541148	0.0641453	1.00503	0.947323	1.06625
ebi-a-GCST90001653	gen_samplesize_1finngen_R9_O15_PRE_OR_ECLAMPSIA	outcome	|| id:ebi-a-GCST90001653	Weighted mode	14	0.00435927	0.0286863	0.881549	-0.0518658	0.0605843	1.00437	0.949456	1.06246
ebi-a-GCST90001654	gen_samplesize_1finngen_R9_O15_PRE_OR_ECLAMPSIA	outcome	|| id:ebi-a-GCST90001654	Inverse variance weighted	17	-0.00322443	0.0268649	0.904464	-0.0558795	0.0494307	0.996781	0.945653	1.05067
ebi-a-GCST90001654	gen_samplesize_1finngen_R9_O15_PRE_OR_ECLAMPSIA	outcome	|| id:ebi-a-GCST90001654	MR Egger	17	0.0272493	0.0392447	0.498082	-0.0496704	0.104169	1.02762	0.951543	1.10979
ebi-a-GCST90001654	gen_samplesize_1finngen_R9_O15_PRE_OR_ECLAMPSIA	outcome	|| id:ebi-a-GCST90001654	Weighted median	17	0.0128349	0.0338213	0.704324	-0.0534549	0.0791246	1.01292	0.947949	1.08234
ebi-a-GCST90001654	gen_samplesize_1finngen_R9_O15_PRE_OR_ECLAMPSIA	outcome	|| id:ebi-a-GCST90001654	Weighted mode	17	0.0118137	0.0309772	0.707947	-0.0489017	0.0725291	1.01188	0.952275	1.07522
ebi-a-GCST90001655	gen_samplesize_1finngen_R9_O15_PRE_OR_ECLAMPSIA	outcome	|| id:ebi-a-GCST90001655	Inverse variance weighted	14	-0.0448412	0.0301884	0.137444	-0.104011	0.0143282	0.956149	0.901216	1.01443
ebi-a-GCST90001655	gen_samplesize_1finngen_R9_O15_PRE_OR_ECLAMPSIA	outcome	|| id:ebi-a-GCST90001655	MR Egger	14	-0.0374699	0.0481524	0.45155	-0.131849	0.0569088	0.963223	0.876474	1.05856
ebi-a-GCST90001655	gen_samplesize_1finngen_R9_O15_PRE_OR_ECLAMPSIA	outcome	|| id:ebi-a-GCST90001655	Weighted median	14	-0.0524801	0.0431456	0.223852	-0.137045	0.0320853	0.948873	0.871931	1.03261
ebi-a-GCST90001655	gen_samplesize_1finngen_R9_O15_PRE_OR_ECLAMPSIA	outcome	|| id:ebi-a-GCST90001655	Weighted mode	14	-0.0583184	0.0398541	0.167142	-0.136432	0.0197956	0.94335	0.872465	1.01999
ebi-a-GCST90001656	gen_samplesize_1finngen_R9_O15_PRE_OR_ECLAMPSIA	outcome	|| id:ebi-a-GCST90001656	Inverse variance weighted	14	0.00105749	0.0221218	0.961873	-0.0423011	0.0444161	1.00106	0.958581	1.04542
ebi-a-GCST90001656	gen_samplesize_1finngen_R9_O15_PRE_OR_ECLAMPSIA	outcome	|| id:ebi-a-GCST90001656	MR Egger	14	0.020782	0.0298149	0.499064	-0.0376553	0.0792192	1.021	0.963045	1.08244
ebi-a-GCST90001656	gen_samplesize_1finngen_R9_O15_PRE_OR_ECLAMPSIA	outcome	|| id:ebi-a-GCST90001656	Weighted median	14	-0.00501522	0.0314429	0.873273	-0.0666434	0.056613	0.994997	0.935529	1.05825
ebi-a-GCST90001656	gen_samplesize_1finngen_R9_O15_PRE_OR_ECLAMPSIA	outcome	|| id:ebi-a-GCST90001656	Weighted mode	14	-0.00435927	0.028112	0.87915	-0.0594589	0.0507403	0.99565	0.942274	1.05205
ebi-a-GCST90001657	gen_samplesize_1finngen_R9_O15_PRE_OR_ECLAMPSIA	outcome	|| id:ebi-a-GCST90001657	Inverse variance weighted	7	-0.0173385	0.0535185	0.745959	-0.122235	0.0875577	0.982811	0.884941	1.09151
ebi-a-GCST90001657	gen_samplesize_1finngen_R9_O15_PRE_OR_ECLAMPSIA	outcome	|| id:ebi-a-GCST90001657	MR Egger	7	-0.0326442	0.0931442	0.740268	-0.215207	0.149918	0.967883	0.806375	1.16174
ebi-a-GCST90001657	gen_samplesize_1finngen_R9_O15_PRE_OR_ECLAMPSIA	outcome	|| id:ebi-a-GCST90001657	Weighted median	7	0.0339908	0.0600647	0.571459	-0.083736	0.151718	1.03458	0.919674	1.16383
ebi-a-GCST90001657	gen_samplesize_1finngen_R9_O15_PRE_OR_ECLAMPSIA	outcome	|| id:ebi-a-GCST90001657	Weighted mode	7	0.0382032	0.056751	0.525903	-0.0730287	0.149435	1.03894	0.929574	1.16118
ebi-a-GCST90001658	gen_samplesize_1finngen_R9_O15_PRE_OR_ECLAMPSIA	outcome	|| id:ebi-a-GCST90001658	Inverse variance weighted	22	0.00146464	0.0118315	0.90148	-0.0217252	0.0246544	1.00147	0.978509	1.02496
ebi-a-GCST90001658	gen_samplesize_1finngen_R9_O15_PRE_OR_ECLAMPSIA	outcome	|| id:ebi-a-GCST90001658	MR Egger	22	0.0104249	0.0145538	0.482087	-0.0181005	0.0389503	1.01048	0.982062	1.03972
ebi-a-GCST90001658	gen_samplesize_1finngen_R9_O15_PRE_OR_ECLAMPSIA	outcome	|| id:ebi-a-GCST90001658	Weighted median	22	0.00222765	0.0156001	0.886451	-0.0283486	0.0328039	1.00223	0.972049	1.03335
ebi-a-GCST90001658	gen_samplesize_1finngen_R9_O15_PRE_OR_ECLAMPSIA	outcome	|| id:ebi-a-GCST90001658	Weighted mode	22	0.00246908	0.0126035	0.846568	-0.0222337	0.0271719	1.00247	0.978012	1.02754
ebi-a-GCST90001659	gen_samplesize_1finngen_R9_O15_PRE_OR_ECLAMPSIA	outcome	|| id:ebi-a-GCST90001659	Inverse variance weighted	18	-0.0130661	0.014325	0.361706	-0.041143	0.0150108	0.987019	0.959692	1.01512
ebi-a-GCST90001659	gen_samplesize_1finngen_R9_O15_PRE_OR_ECLAMPSIA	outcome	|| id:ebi-a-GCST90001659	MR Egger	18	0.00889563	0.0184449	0.636137	-0.0272563	0.0450476	1.00894	0.973112	1.04608
ebi-a-GCST90001659	gen_samplesize_1finngen_R9_O15_PRE_OR_ECLAMPSIA	outcome	|| id:ebi-a-GCST90001659	Weighted median	18	-0.00259582	0.0186562	0.88934	-0.039162	0.0339704	0.997408	0.961595	1.03455
ebi-a-GCST90001659	gen_samplesize_1finngen_R9_O15_PRE_OR_ECLAMPSIA	outcome	|| id:ebi-a-GCST90001659	Weighted mode	18	-0.00106529	0.0167519	0.950037	-0.033899	0.0317685	0.998935	0.966669	1.03228
ebi-a-GCST90001660	gen_samplesize_1finngen_R9_O15_PRE_OR_ECLAMPSIA	outcome	|| id:ebi-a-GCST90001660	Inverse variance weighted	18	-0.00524839	0.0178075	0.768201	-0.0401512	0.0296544	0.994765	0.960644	1.0301
ebi-a-GCST90001660	gen_samplesize_1finngen_R9_O15_PRE_OR_ECLAMPSIA	outcome	|| id:ebi-a-GCST90001660	MR Egger	18	-0.0105035	0.0279122	0.711633	-0.0652114	0.0442044	0.989551	0.936869	1.0452
ebi-a-GCST90001660	gen_samplesize_1finngen_R9_O15_PRE_OR_ECLAMPSIA	outcome	|| id:ebi-a-GCST90001660	Weighted median	18	-0.0171164	0.0234934	0.466269	-0.0631636	0.0289307	0.983029	0.93879	1.02935
ebi-a-GCST90001660	gen_samplesize_1finngen_R9_O15_PRE_OR_ECLAMPSIA	outcome	|| id:ebi-a-GCST90001660	Weighted mode	18	-0.0177643	0.0227467	0.445565	-0.0623478	0.0268192	0.982393	0.939556	1.02718
ebi-a-GCST90001661	gen_samplesize_1finngen_R9_O15_PRE_OR_ECLAMPSIA	outcome	|| id:ebi-a-GCST90001661	Inverse variance weighted	17	-0.0446036	0.0241343	0.0645822	-0.0919069	0.00269969	0.956377	0.91219	1.0027
ebi-a-GCST90001661	gen_samplesize_1finngen_R9_O15_PRE_OR_ECLAMPSIA	outcome	|| id:ebi-a-GCST90001661	MR Egger	17	-0.0144657	0.0376906	0.706511	-0.0883394	0.0594079	0.985638	0.91545	1.06121
ebi-a-GCST90001661	gen_samplesize_1finngen_R9_O15_PRE_OR_ECLAMPSIA	outcome	|| id:ebi-a-GCST90001661	Weighted median	17	-0.047377	0.0349145	0.1748	-0.115809	0.0210555	0.953728	0.890645	1.02128
ebi-a-GCST90001661	gen_samplesize_1finngen_R9_O15_PRE_OR_ECLAMPSIA	outcome	|| id:ebi-a-GCST90001661	Weighted mode	17	-0.0368707	0.0350855	0.308927	-0.105638	0.0318969	0.963801	0.89975	1.03241
ebi-a-GCST90001662	gen_samplesize_1finngen_R9_O15_PRE_OR_ECLAMPSIA	outcome	|| id:ebi-a-GCST90001662	Inverse variance weighted	9	-0.019212	0.0400016	0.631027	-0.0976152	0.0591912	0.980971	0.906998	1.06098
ebi-a-GCST90001662	gen_samplesize_1finngen_R9_O15_PRE_OR_ECLAMPSIA	outcome	|| id:ebi-a-GCST90001662	MR Egger	9	-0.0393119	0.0674252	0.578155	-0.171465	0.0928415	0.961451	0.84243	1.09729
ebi-a-GCST90001662	gen_samplesize_1finngen_R9_O15_PRE_OR_ECLAMPSIA	outcome	|| id:ebi-a-GCST90001662	Weighted median	9	-0.0478131	0.0540188	0.376092	-0.15369	0.0580637	0.953312	0.857538	1.05978
ebi-a-GCST90001662	gen_samplesize_1finngen_R9_O15_PRE_OR_ECLAMPSIA	outcome	|| id:ebi-a-GCST90001662	Weighted mode	9	-0.0455373	0.051848	0.405394	-0.147159	0.0560848	0.955484	0.863156	1.05769
ebi-a-GCST90001663	gen_samplesize_1finngen_R9_O15_PRE_OR_ECLAMPSIA	outcome	|| id:ebi-a-GCST90001663	Inverse variance weighted	19	-0.0110741	0.018748	0.554734	-0.0478203	0.0256721	0.988987	0.953305	1.026
ebi-a-GCST90001663	gen_samplesize_1finngen_R9_O15_PRE_OR_ECLAMPSIA	outcome	|| id:ebi-a-GCST90001663	MR Egger	19	0.00279171	0.0268081	0.91828	-0.0497522	0.0553356	1.0028	0.951465	1.0569
ebi-a-GCST90001663	gen_samplesize_1finngen_R9_O15_PRE_OR_ECLAMPSIA	outcome	|| id:ebi-a-GCST90001663	Weighted median	19	0.00102997	0.0259813	0.968378	-0.0498933	0.0519532	1.00103	0.951331	1.05333
ebi-a-GCST90001663	gen_samplesize_1finngen_R9_O15_PRE_OR_ECLAMPSIA	outcome	|| id:ebi-a-GCST90001663	Weighted mode	19	0.00266739	0.026147	0.919872	-0.0485807	0.0539155	1.00267	0.95258	1.0554
ebi-a-GCST90001664	gen_samplesize_1finngen_R9_O15_PRE_OR_ECLAMPSIA	outcome	|| id:ebi-a-GCST90001664	Inverse variance weighted	29	0.00606676	0.00400594	0.129914	-0.00178489	0.0139184	1.00609	0.998217	1.01402
ebi-a-GCST90001664	gen_samplesize_1finngen_R9_O15_PRE_OR_ECLAMPSIA	outcome	|| id:ebi-a-GCST90001664	MR Egger	29	0.00578814	0.00435002	0.19445	-0.00273791	0.0143142	1.0058	0.997266	1.01442
ebi-a-GCST90001664	gen_samplesize_1finngen_R9_O15_PRE_OR_ECLAMPSIA	outcome	|| id:ebi-a-GCST90001664	Weighted median	29	0.00712783	0.00383907	0.06336	-0.000396742	0.0146524	1.00715	0.999603	1.01476
ebi-a-GCST90001664	gen_samplesize_1finngen_R9_O15_PRE_OR_ECLAMPSIA	outcome	|| id:ebi-a-GCST90001664	Weighted mode	29	0.00638496	0.00380527	0.104491	-0.00107337	0.0138433	1.00641	0.998927	1.01394
ebi-a-GCST90001665	gen_samplesize_1finngen_R9_O15_PRE_OR_ECLAMPSIA	outcome	|| id:ebi-a-GCST90001665	Inverse variance weighted	21	0.00358015	0.0185077	0.846613	-0.0326949	0.0398552	1.00359	0.967834	1.04066
ebi-a-GCST90001665	gen_samplesize_1finngen_R9_O15_PRE_OR_ECLAMPSIA	outcome	|| id:ebi-a-GCST90001665	MR Egger	21	-0.0126192	0.0235185	0.597796	-0.0587154	0.0334771	0.98746	0.942975	1.03404
ebi-a-GCST90001665	gen_samplesize_1finngen_R9_O15_PRE_OR_ECLAMPSIA	outcome	|| id:ebi-a-GCST90001665	Weighted median	21	0.00295848	0.0224621	0.895214	-0.0410673	0.0469843	1.00296	0.959765	1.04811
ebi-a-GCST90001665	gen_samplesize_1finngen_R9_O15_PRE_OR_ECLAMPSIA	outcome	|| id:ebi-a-GCST90001665	Weighted mode	21	-0.00136622	0.0208255	0.948345	-0.0421841	0.0394517	0.998635	0.958693	1.04024
ebi-a-GCST90001666	gen_samplesize_1finngen_R9_O15_PRE_OR_ECLAMPSIA	outcome	|| id:ebi-a-GCST90001666	Inverse variance weighted	34	0.00175236	0.00231237	0.44856	-0.0027799	0.00628461	1.00175	0.997224	1.0063
ebi-a-GCST90001666	gen_samplesize_1finngen_R9_O15_PRE_OR_ECLAMPSIA	outcome	|| id:ebi-a-GCST90001666	MR Egger	34	0.00316814	0.00249635	0.213556	-0.00172471	0.00806099	1.00317	0.998277	1.00809
ebi-a-GCST90001666	gen_samplesize_1finngen_R9_O15_PRE_OR_ECLAMPSIA	outcome	|| id:ebi-a-GCST90001666	Weighted median	34	-0.000640437	0.00364104	0.860377	-0.00777688	0.006496	0.99936	0.992253	1.00652
ebi-a-GCST90001666	gen_samplesize_1finngen_R9_O15_PRE_OR_ECLAMPSIA	outcome	|| id:ebi-a-GCST90001666	Weighted mode	34	0.00182916	0.00270172	0.503103	-0.00346622	0.00712454	1.00183	0.99654	1.00715
ebi-a-GCST90001667	gen_samplesize_1finngen_R9_O15_PRE_OR_ECLAMPSIA	outcome	|| id:ebi-a-GCST90001667	Inverse variance weighted	15	0.0130335	0.0105224	0.215478	-0.0075904	0.0336574	1.01312	0.992438	1.03423
ebi-a-GCST90001667	gen_samplesize_1finngen_R9_O15_PRE_OR_ECLAMPSIA	outcome	|| id:ebi-a-GCST90001667	MR Egger	15	0.0163072	0.0125272	0.2156	-0.00824615	0.0408605	1.01644	0.991788	1.04171
ebi-a-GCST90001667	gen_samplesize_1finngen_R9_O15_PRE_OR_ECLAMPSIA	outcome	|| id:ebi-a-GCST90001667	Weighted median	15	0.00712469	0.0124308	0.566545	-0.0172397	0.0314891	1.00715	0.982908	1.03199
ebi-a-GCST90001667	gen_samplesize_1finngen_R9_O15_PRE_OR_ECLAMPSIA	outcome	|| id:ebi-a-GCST90001667	Weighted mode	15	0.00755402	0.0111545	0.509305	-0.0143088	0.0294169	1.00758	0.985793	1.02985
ebi-a-GCST90001668	gen_samplesize_1finngen_R9_O15_PRE_OR_ECLAMPSIA	outcome	|| id:ebi-a-GCST90001668	Inverse variance weighted (multiplicative random effects)	18	0.0113033	0.0177476	0.524195	-0.0234819	0.0460885	1.01137	0.976792	1.04717
ebi-a-GCST90001668	gen_samplesize_1finngen_R9_O15_PRE_OR_ECLAMPSIA	outcome	|| id:ebi-a-GCST90001668	MR Egger	18	0.00754302	0.0226654	0.743607	-0.0368812	0.0519672	1.00757	0.963791	1.05334
ebi-a-GCST90001668	gen_samplesize_1finngen_R9_O15_PRE_OR_ECLAMPSIA	outcome	|| id:ebi-a-GCST90001668	Weighted median	18	0.0190456	0.0210281	0.365084	-0.0221696	0.0602608	1.01923	0.978074	1.06211
ebi-a-GCST90001668	gen_samplesize_1finngen_R9_O15_PRE_OR_ECLAMPSIA	outcome	|| id:ebi-a-GCST90001668	Weighted mode	18	0.0193449	0.0206021	0.360894	-0.0210352	0.059725	1.01953	0.979184	1.06154
ebi-a-GCST90001669	gen_samplesize_1finngen_R9_O15_PRE_OR_ECLAMPSIA	outcome	|| id:ebi-a-GCST90001669	Inverse variance weighted	18	-0.00349996	0.00507492	0.49041	-0.0134468	0.0064469	0.996506	0.986643	1.00647
ebi-a-GCST90001669	gen_samplesize_1finngen_R9_O15_PRE_OR_ECLAMPSIA	outcome	|| id:ebi-a-GCST90001669	MR Egger	18	-0.00596181	0.00559244	0.302225	-0.016923	0.00499938	0.994056	0.983219	1.00501
ebi-a-GCST90001669	gen_samplesize_1finngen_R9_O15_PRE_OR_ECLAMPSIA	outcome	|| id:ebi-a-GCST90001669	Weighted median	18	-0.00580567	0.005451	0.286847	-0.0164896	0.0048783	0.994211	0.983646	1.00489
ebi-a-GCST90001669	gen_samplesize_1finngen_R9_O15_PRE_OR_ECLAMPSIA	outcome	|| id:ebi-a-GCST90001669	Weighted mode	18	-0.00495274	0.00434656	0.270312	-0.013472	0.00356651	0.99506	0.986618	1.00357
ebi-a-GCST90001670	gen_samplesize_1finngen_R9_O15_PRE_OR_ECLAMPSIA	outcome	|| id:ebi-a-GCST90001670	Inverse variance weighted	15	-0.00693489	0.0271395	0.798316	-0.0601283	0.0462585	0.993089	0.941644	1.04735
ebi-a-GCST90001670	gen_samplesize_1finngen_R9_O15_PRE_OR_ECLAMPSIA	outcome	|| id:ebi-a-GCST90001670	MR Egger	15	0.0298288	0.0447274	0.516497	-0.0578368	0.117495	1.03028	0.943804	1.12468
ebi-a-GCST90001670	gen_samplesize_1finngen_R9_O15_PRE_OR_ECLAMPSIA	outcome	|| id:ebi-a-GCST90001670	Weighted median	15	0.0144101	0.0383165	0.706856	-0.0606902	0.0895104	1.01451	0.941115	1.09364
ebi-a-GCST90001670	gen_samplesize_1finngen_R9_O15_PRE_OR_ECLAMPSIA	outcome	|| id:ebi-a-GCST90001670	Weighted mode	15	-0.0118117	0.0399077	0.771594	-0.0900307	0.0664074	0.988258	0.913903	1.06866
ebi-a-GCST90001671	gen_samplesize_1finngen_R9_O15_PRE_OR_ECLAMPSIA	outcome	|| id:ebi-a-GCST90001671	Inverse variance weighted	11	-0.0541415	0.0274886	0.048884	-0.108019	-0.000263937	0.947298	0.89761	0.999736
ebi-a-GCST90001671	gen_samplesize_1finngen_R9_O15_PRE_OR_ECLAMPSIA	outcome	|| id:ebi-a-GCST90001671	MR Egger	11	-0.00256378	0.0479172	0.958499	-0.0964815	0.091354	0.99744	0.908027	1.09566
ebi-a-GCST90001671	gen_samplesize_1finngen_R9_O15_PRE_OR_ECLAMPSIA	outcome	|| id:ebi-a-GCST90001671	Weighted median	11	-0.0709232	0.0338358	0.0360731	-0.137241	-0.00460513	0.931533	0.87176	0.995405
ebi-a-GCST90001671	gen_samplesize_1finngen_R9_O15_PRE_OR_ECLAMPSIA	outcome	|| id:ebi-a-GCST90001671	Weighted mode	11	-0.0663742	0.0345608	0.0837388	-0.134113	0.00136491	0.935781	0.874491	1.00137
ebi-a-GCST90001672	gen_samplesize_1finngen_R9_O15_PRE_OR_ECLAMPSIA	outcome	|| id:ebi-a-GCST90001672	Inverse variance weighted	16	-0.0203572	0.0205762	0.322487	-0.0606866	0.0199721	0.979849	0.941118	1.02017
ebi-a-GCST90001672	gen_samplesize_1finngen_R9_O15_PRE_OR_ECLAMPSIA	outcome	|| id:ebi-a-GCST90001672	MR Egger	16	0.0141915	0.028963	0.631733	-0.0425761	0.070959	1.01429	0.958318	1.07354
ebi-a-GCST90001672	gen_samplesize_1finngen_R9_O15_PRE_OR_ECLAMPSIA	outcome	|| id:ebi-a-GCST90001672	Weighted median	16	-0.013217	0.0293977	0.653005	-0.0708364	0.0444025	0.98687	0.931614	1.0454
ebi-a-GCST90001672	gen_samplesize_1finngen_R9_O15_PRE_OR_ECLAMPSIA	outcome	|| id:ebi-a-GCST90001672	Weighted mode	16	-0.0157513	0.0249988	0.538121	-0.0647489	0.0332463	0.984372	0.937303	1.03381
ebi-a-GCST90001673	gen_samplesize_1finngen_R9_O15_PRE_OR_ECLAMPSIA	outcome	|| id:ebi-a-GCST90001673	Inverse variance weighted	10	0.0129241	0.0252979	0.609439	-0.0366598	0.062508	1.01301	0.964004	1.0645
ebi-a-GCST90001673	gen_samplesize_1finngen_R9_O15_PRE_OR_ECLAMPSIA	outcome	|| id:ebi-a-GCST90001673	MR Egger	10	-0.0168194	0.0296324	0.585878	-0.0748989	0.0412602	0.983321	0.927837	1.04212
ebi-a-GCST90001673	gen_samplesize_1finngen_R9_O15_PRE_OR_ECLAMPSIA	outcome	|| id:ebi-a-GCST90001673	Weighted median	10	0.0012686	0.0266331	0.962009	-0.0509322	0.0534694	1.00127	0.950343	1.05492
ebi-a-GCST90001673	gen_samplesize_1finngen_R9_O15_PRE_OR_ECLAMPSIA	outcome	|| id:ebi-a-GCST90001673	Weighted mode	10	-0.00154426	0.0250325	0.952158	-0.0506079	0.0475194	0.998457	0.950651	1.04867
ebi-a-GCST90001674	gen_samplesize_1finngen_R9_O15_PRE_OR_ECLAMPSIA	outcome	|| id:ebi-a-GCST90001674	Inverse variance weighted	12	-0.00369982	0.0185979	0.842311	-0.0401516	0.032752	0.996307	0.960644	1.03329
ebi-a-GCST90001674	gen_samplesize_1finngen_R9_O15_PRE_OR_ECLAMPSIA	outcome	|| id:ebi-a-GCST90001674	MR Egger	12	0.00555302	0.0241638	0.822874	-0.041808	0.052914	1.00557	0.959054	1.05434
ebi-a-GCST90001674	gen_samplesize_1finngen_R9_O15_PRE_OR_ECLAMPSIA	outcome	|| id:ebi-a-GCST90001674	Weighted median	12	0.000673438	0.0224965	0.976119	-0.0434198	0.0447666	1.00067	0.957509	1.04578
ebi-a-GCST90001674	gen_samplesize_1finngen_R9_O15_PRE_OR_ECLAMPSIA	outcome	|| id:ebi-a-GCST90001674	Weighted mode	12	0.000372179	0.0211448	0.986272	-0.0410716	0.0418159	1.00037	0.95976	1.0427
ebi-a-GCST90001675	gen_samplesize_1finngen_R9_O15_PRE_OR_ECLAMPSIA	outcome	|| id:ebi-a-GCST90001675	Inverse variance weighted	11	-0.0317857	0.0416925	0.44583	-0.113503	0.0499316	0.968714	0.892701	1.0512
ebi-a-GCST90001675	gen_samplesize_1finngen_R9_O15_PRE_OR_ECLAMPSIA	outcome	|| id:ebi-a-GCST90001675	MR Egger	11	-0.129998	0.102606	0.236969	-0.331105	0.0711089	0.878097	0.71813	1.0737
ebi-a-GCST90001675	gen_samplesize_1finngen_R9_O15_PRE_OR_ECLAMPSIA	outcome	|| id:ebi-a-GCST90001675	Weighted median	11	-0.0616866	0.047757	0.196469	-0.15529	0.0319171	0.940177	0.856167	1.03243
ebi-a-GCST90001675	gen_samplesize_1finngen_R9_O15_PRE_OR_ECLAMPSIA	outcome	|| id:ebi-a-GCST90001675	Weighted mode	11	-0.117386	0.0601501	0.0795441	-0.23528	0.000508491	0.889242	0.79035	1.00051
ebi-a-GCST90001676	gen_samplesize_1finngen_R9_O15_PRE_OR_ECLAMPSIA	outcome	|| id:ebi-a-GCST90001676	Inverse variance weighted	5	0.114173	0.0659114	0.0832354	-0.0150137	0.243359	1.12095	0.985098	1.27553
ebi-a-GCST90001676	gen_samplesize_1finngen_R9_O15_PRE_OR_ECLAMPSIA	outcome	|| id:ebi-a-GCST90001676	MR Egger	5	-0.057645	0.226569	0.815609	-0.50172	0.38643	0.943985	0.605488	1.47172
ebi-a-GCST90001676	gen_samplesize_1finngen_R9_O15_PRE_OR_ECLAMPSIA	outcome	|| id:ebi-a-GCST90001676	Weighted median	5	0.0715033	0.0801469	0.372311	-0.0855846	0.228591	1.07412	0.917975	1.25683
ebi-a-GCST90001676	gen_samplesize_1finngen_R9_O15_PRE_OR_ECLAMPSIA	outcome	|| id:ebi-a-GCST90001676	Weighted mode	5	0.0790827	0.0918214	0.437659	-0.100887	0.259053	1.08229	0.904035	1.2957
ebi-a-GCST90001677	gen_samplesize_1finngen_R9_O15_PRE_OR_ECLAMPSIA	outcome	|| id:ebi-a-GCST90001677	Inverse variance weighted (multiplicative random effects)	14	0.0214138	0.047616	0.652913	-0.0719136	0.114741	1.02164	0.930611	1.12158
ebi-a-GCST90001677	gen_samplesize_1finngen_R9_O15_PRE_OR_ECLAMPSIA	outcome	|| id:ebi-a-GCST90001677	MR Egger	14	0.0351769	0.0782745	0.66115	-0.118241	0.188595	1.0358	0.888482	1.20755
ebi-a-GCST90001677	gen_samplesize_1finngen_R9_O15_PRE_OR_ECLAMPSIA	outcome	|| id:ebi-a-GCST90001677	Weighted median	14	0.0779005	0.0479517	0.104256	-0.0160848	0.171886	1.08102	0.984044	1.18754
ebi-a-GCST90001677	gen_samplesize_1finngen_R9_O15_PRE_OR_ECLAMPSIA	outcome	|| id:ebi-a-GCST90001677	Weighted mode	14	0.0872584	0.0501564	0.105511	-0.0110481	0.185565	1.09118	0.989013	1.2039
ebi-a-GCST90001678	gen_samplesize_1finngen_R9_O15_PRE_OR_ECLAMPSIA	outcome	|| id:ebi-a-GCST90001678	Inverse variance weighted	12	-0.0286405	0.0250981	0.253811	-0.0778329	0.0205519	0.971766	0.925119	1.02076
ebi-a-GCST90001678	gen_samplesize_1finngen_R9_O15_PRE_OR_ECLAMPSIA	outcome	|| id:ebi-a-GCST90001678	MR Egger	12	-0.0151147	0.0350234	0.675217	-0.0837604	0.0535311	0.984999	0.919652	1.05499
ebi-a-GCST90001678	gen_samplesize_1finngen_R9_O15_PRE_OR_ECLAMPSIA	outcome	|| id:ebi-a-GCST90001678	Weighted median	12	-0.00515889	0.0342063	0.88012	-0.0722033	0.0618856	0.994854	0.930342	1.06384
ebi-a-GCST90001678	gen_samplesize_1finngen_R9_O15_PRE_OR_ECLAMPSIA	outcome	|| id:ebi-a-GCST90001678	Weighted mode	12	-0.00175425	0.0335327	0.959216	-0.0674783	0.0639698	0.998247	0.934748	1.06606
ebi-a-GCST90001679	gen_samplesize_1finngen_R9_O15_PRE_OR_ECLAMPSIA	outcome	|| id:ebi-a-GCST90001679	Inverse variance weighted	10	0.0263694	0.03227	0.413843	-0.0368797	0.0896186	1.02672	0.963792	1.09376
ebi-a-GCST90001679	gen_samplesize_1finngen_R9_O15_PRE_OR_ECLAMPSIA	outcome	|| id:ebi-a-GCST90001679	MR Egger	10	0.0665467	0.0543107	0.255311	-0.0399023	0.172996	1.06881	0.960883	1.18886
ebi-a-GCST90001679	gen_samplesize_1finngen_R9_O15_PRE_OR_ECLAMPSIA	outcome	|| id:ebi-a-GCST90001679	Weighted median	10	0.0243304	0.0460388	0.597169	-0.0659056	0.114566	1.02463	0.936219	1.12139
ebi-a-GCST90001679	gen_samplesize_1finngen_R9_O15_PRE_OR_ECLAMPSIA	outcome	|| id:ebi-a-GCST90001679	Weighted mode	10	0.0798559	0.0542021	0.174762	-0.0263802	0.186092	1.08313	0.973965	1.20453
ebi-a-GCST90001680	gen_samplesize_1finngen_R9_O15_PRE_OR_ECLAMPSIA	outcome	|| id:ebi-a-GCST90001680	Inverse variance weighted (multiplicative random effects)	11	0.0227793	0.0501937	0.649954	-0.0756005	0.121159	1.02304	0.927187	1.1288
ebi-a-GCST90001680	gen_samplesize_1finngen_R9_O15_PRE_OR_ECLAMPSIA	outcome	|| id:ebi-a-GCST90001680	MR Egger	11	0.010243	0.0920052	0.913798	-0.170087	0.190573	1.0103	0.843591	1.20994
ebi-a-GCST90001680	gen_samplesize_1finngen_R9_O15_PRE_OR_ECLAMPSIA	outcome	|| id:ebi-a-GCST90001680	Weighted median	11	0.0571828	0.0487296	0.240607	-0.0383272	0.152693	1.05885	0.962398	1.16497
ebi-a-GCST90001680	gen_samplesize_1finngen_R9_O15_PRE_OR_ECLAMPSIA	outcome	|| id:ebi-a-GCST90001680	Weighted mode	11	0.071567	0.0526661	0.204042	-0.0316586	0.174793	1.07419	0.968837	1.191
ebi-a-GCST90001681	gen_samplesize_1finngen_R9_O15_PRE_OR_ECLAMPSIA	outcome	|| id:ebi-a-GCST90001681	Inverse variance weighted	20	0.0199235	0.0244995	0.416092	-0.0280955	0.0679425	1.02012	0.972295	1.0703
ebi-a-GCST90001681	gen_samplesize_1finngen_R9_O15_PRE_OR_ECLAMPSIA	outcome	|| id:ebi-a-GCST90001681	MR Egger	20	0.100478	0.0456874	0.0411696	0.010931	0.190026	1.1057	1.01099	1.20928
ebi-a-GCST90001681	gen_samplesize_1finngen_R9_O15_PRE_OR_ECLAMPSIA	outcome	|| id:ebi-a-GCST90001681	Weighted median	20	0.0297189	0.0350602	0.39663	-0.038999	0.0984369	1.03016	0.961752	1.10344
ebi-a-GCST90001681	gen_samplesize_1finngen_R9_O15_PRE_OR_ECLAMPSIA	outcome	|| id:ebi-a-GCST90001681	Weighted mode	20	0.0608603	0.0447354	0.18961	-0.0268211	0.148542	1.06275	0.973535	1.16014
ebi-a-GCST90001682	gen_samplesize_1finngen_R9_O15_PRE_OR_ECLAMPSIA	outcome	|| id:ebi-a-GCST90001682	Inverse variance weighted	5	0.108305	0.0546168	0.0473679	0.00125596	0.215354	1.11439	1.00126	1.2403
ebi-a-GCST90001682	gen_samplesize_1finngen_R9_O15_PRE_OR_ECLAMPSIA	outcome	|| id:ebi-a-GCST90001682	MR Egger	5	0.311154	0.420094	0.512594	-0.512231	1.13454	1.365	0.599157	3.10974
ebi-a-GCST90001682	gen_samplesize_1finngen_R9_O15_PRE_OR_ECLAMPSIA	outcome	|| id:ebi-a-GCST90001682	Weighted median	5	0.0649809	0.0691596	0.347433	-0.0705718	0.200534	1.06714	0.931861	1.22205
ebi-a-GCST90001682	gen_samplesize_1finngen_R9_O15_PRE_OR_ECLAMPSIA	outcome	|| id:ebi-a-GCST90001682	Weighted mode	5	0.0376176	0.100133	0.726231	-0.158643	0.233878	1.03833	0.853301	1.26349
ebi-a-GCST90001683	gen_samplesize_1finngen_R9_O15_PRE_OR_ECLAMPSIA	outcome	|| id:ebi-a-GCST90001683	Inverse variance weighted	7	-0.0596627	0.0390429	0.12648	-0.136187	0.0168614	0.942082	0.872679	1.017
ebi-a-GCST90001683	gen_samplesize_1finngen_R9_O15_PRE_OR_ECLAMPSIA	outcome	|| id:ebi-a-GCST90001683	MR Egger	7	-0.0539675	0.0546901	0.369061	-0.16116	0.0532251	0.947463	0.851156	1.05467
ebi-a-GCST90001683	gen_samplesize_1finngen_R9_O15_PRE_OR_ECLAMPSIA	outcome	|| id:ebi-a-GCST90001683	Weighted median	7	-0.0544815	0.0488167	0.264404	-0.150162	0.0411993	0.946976	0.860568	1.04206
ebi-a-GCST90001683	gen_samplesize_1finngen_R9_O15_PRE_OR_ECLAMPSIA	outcome	|| id:ebi-a-GCST90001683	Weighted mode	7	-0.0526499	0.0498483	0.331536	-0.150353	0.0450527	0.948712	0.860405	1.04608
ebi-a-GCST90001684	gen_samplesize_1finngen_R9_O15_PRE_OR_ECLAMPSIA	outcome	|| id:ebi-a-GCST90001684	Inverse variance weighted	5	0.0898012	0.0775961	0.247154	-0.0622871	0.241889	1.09396	0.939613	1.27365
ebi-a-GCST90001684	gen_samplesize_1finngen_R9_O15_PRE_OR_ECLAMPSIA	outcome	|| id:ebi-a-GCST90001684	MR Egger	5	0.440343	0.411745	0.363268	-0.366678	1.24736	1.55324	0.693033	3.48115
ebi-a-GCST90001684	gen_samplesize_1finngen_R9_O15_PRE_OR_ECLAMPSIA	outcome	|| id:ebi-a-GCST90001684	Weighted median	5	0.00475367	0.0779292	0.951359	-0.147987	0.157495	1.00476	0.862442	1.17057
ebi-a-GCST90001684	gen_samplesize_1finngen_R9_O15_PRE_OR_ECLAMPSIA	outcome	|| id:ebi-a-GCST90001684	Weighted mode	5	-0.0547844	0.159339	0.748292	-0.367088	0.257519	0.946689	0.692749	1.29372
ebi-a-GCST90001685	gen_samplesize_1finngen_R9_O15_PRE_OR_ECLAMPSIA	outcome	|| id:ebi-a-GCST90001685	Inverse variance weighted	8	-0.0385328	0.0560343	0.491664	-0.14836	0.0712944	0.9622	0.862121	1.0739
ebi-a-GCST90001685	gen_samplesize_1finngen_R9_O15_PRE_OR_ECLAMPSIA	outcome	|| id:ebi-a-GCST90001685	MR Egger	8	-0.0569168	0.205204	0.790808	-0.459117	0.345284	0.944673	0.631841	1.41239
ebi-a-GCST90001685	gen_samplesize_1finngen_R9_O15_PRE_OR_ECLAMPSIA	outcome	|| id:ebi-a-GCST90001685	Weighted median	8	-0.0322204	0.0708404	0.649231	-0.171068	0.106627	0.968293	0.842765	1.11252
ebi-a-GCST90001685	gen_samplesize_1finngen_R9_O15_PRE_OR_ECLAMPSIA	outcome	|| id:ebi-a-GCST90001685	Weighted mode	8	-0.0282449	0.0909708	0.765234	-0.206548	0.150058	0.97215	0.813387	1.1619
ebi-a-GCST90001686	gen_samplesize_1finngen_R9_O15_PRE_OR_ECLAMPSIA	outcome	|| id:ebi-a-GCST90001686	Inverse variance weighted	13	-0.0285347	0.0375881	0.447768	-0.102207	0.045138	0.971869	0.902842	1.04617
ebi-a-GCST90001686	gen_samplesize_1finngen_R9_O15_PRE_OR_ECLAMPSIA	outcome	|| id:ebi-a-GCST90001686	MR Egger	13	-0.0117871	0.0811833	0.887187	-0.170906	0.147332	0.988282	0.842901	1.15874
ebi-a-GCST90001686	gen_samplesize_1finngen_R9_O15_PRE_OR_ECLAMPSIA	outcome	|| id:ebi-a-GCST90001686	Weighted median	13	-0.0495336	0.0567247	0.382539	-0.160714	0.0616469	0.951673	0.851536	1.06359
ebi-a-GCST90001686	gen_samplesize_1finngen_R9_O15_PRE_OR_ECLAMPSIA	outcome	|| id:ebi-a-GCST90001686	Weighted mode	13	-0.0481312	0.0584852	0.42658	-0.162762	0.0664998	0.953009	0.849793	1.06876
ebi-a-GCST90001687	gen_samplesize_1finngen_R9_O15_PRE_OR_ECLAMPSIA	outcome	|| id:ebi-a-GCST90001687	Inverse variance weighted	12	0.0636666	0.0501579	0.204326	-0.0346429	0.161976	1.06574	0.96595	1.17583
ebi-a-GCST90001687	gen_samplesize_1finngen_R9_O15_PRE_OR_ECLAMPSIA	outcome	|| id:ebi-a-GCST90001687	MR Egger	12	0.0971512	0.153511	0.541025	-0.20373	0.398033	1.10203	0.815682	1.48889
ebi-a-GCST90001687	gen_samplesize_1finngen_R9_O15_PRE_OR_ECLAMPSIA	outcome	|| id:ebi-a-GCST90001687	Weighted median	12	0.0291935	0.0598973	0.625979	-0.0882051	0.146592	1.02962	0.915573	1.15788
ebi-a-GCST90001687	gen_samplesize_1finngen_R9_O15_PRE_OR_ECLAMPSIA	outcome	|| id:ebi-a-GCST90001687	Weighted mode	12	-0.0105237	0.0953214	0.914079	-0.197354	0.176306	0.989532	0.8209	1.1928
ebi-a-GCST90001688	gen_samplesize_1finngen_R9_O15_PRE_OR_ECLAMPSIA	outcome	|| id:ebi-a-GCST90001688	Inverse variance weighted	94	-0.000285089	0.0011572	0.805402	-0.0025532	0.00198302	0.999715	0.99745	1.00198
ebi-a-GCST90001688	gen_samplesize_1finngen_R9_O15_PRE_OR_ECLAMPSIA	outcome	|| id:ebi-a-GCST90001688	MR Egger	94	0.00138831	0.00145871	0.343721	-0.00147075	0.00424738	1.00139	0.99853	1.00426
ebi-a-GCST90001688	gen_samplesize_1finngen_R9_O15_PRE_OR_ECLAMPSIA	outcome	|| id:ebi-a-GCST90001688	Weighted median	94	7.10917e-05	0.00200189	0.971671	-0.00385262	0.0039948	1.00007	0.996155	1.004
ebi-a-GCST90001688	gen_samplesize_1finngen_R9_O15_PRE_OR_ECLAMPSIA	outcome	|| id:ebi-a-GCST90001688	Weighted mode	94	0.000467456	0.00178329	0.7938	-0.00302779	0.0039627	1.00047	0.996977	1.00397
ebi-a-GCST90001689	gen_samplesize_1finngen_R9_O15_PRE_OR_ECLAMPSIA	outcome	|| id:ebi-a-GCST90001689	Inverse variance weighted	20	-0.00350456	0.0039521	0.375209	-0.0112507	0.00424155	0.996502	0.988812	1.00425
ebi-a-GCST90001689	gen_samplesize_1finngen_R9_O15_PRE_OR_ECLAMPSIA	outcome	|| id:ebi-a-GCST90001689	MR Egger	20	-0.00220917	0.00412374	0.598711	-0.0102917	0.00587337	0.997793	0.989761	1.00589
ebi-a-GCST90001689	gen_samplesize_1finngen_R9_O15_PRE_OR_ECLAMPSIA	outcome	|| id:ebi-a-GCST90001689	Weighted median	20	-0.00287528	0.00460335	0.53223	-0.0118979	0.00614729	0.997129	0.988173	1.00617
ebi-a-GCST90001689	gen_samplesize_1finngen_R9_O15_PRE_OR_ECLAMPSIA	outcome	|| id:ebi-a-GCST90001689	Weighted mode	20	-0.00282342	0.0040476	0.493903	-0.0107567	0.00510986	0.997181	0.989301	1.00512
ebi-a-GCST90001690	gen_samplesize_1finngen_R9_O15_PRE_OR_ECLAMPSIA	outcome	|| id:ebi-a-GCST90001690	Inverse variance weighted	24	-0.00265946	0.00444132	0.549306	-0.0113644	0.00604552	0.997344	0.9887	1.00606
ebi-a-GCST90001690	gen_samplesize_1finngen_R9_O15_PRE_OR_ECLAMPSIA	outcome	|| id:ebi-a-GCST90001690	MR Egger	24	-0.00280728	0.00468452	0.555116	-0.0119889	0.00637437	0.997197	0.988083	1.00639
ebi-a-GCST90001690	gen_samplesize_1finngen_R9_O15_PRE_OR_ECLAMPSIA	outcome	|| id:ebi-a-GCST90001690	Weighted median	24	-0.00237904	0.00409521	0.561286	-0.0104056	0.00564756	0.997624	0.989648	1.00566
ebi-a-GCST90001690	gen_samplesize_1finngen_R9_O15_PRE_OR_ECLAMPSIA	outcome	|| id:ebi-a-GCST90001690	Weighted mode	24	-0.00191566	0.00389609	0.6276	-0.00955199	0.00572068	0.998086	0.990493	1.00574
ebi-a-GCST90001691	gen_samplesize_1finngen_R9_O15_PRE_OR_ECLAMPSIA	outcome	|| id:ebi-a-GCST90001691	Inverse variance weighted	17	0.00866602	0.00962098	0.367725	-0.0101911	0.0275231	1.0087	0.989861	1.02791
ebi-a-GCST90001691	gen_samplesize_1finngen_R9_O15_PRE_OR_ECLAMPSIA	outcome	|| id:ebi-a-GCST90001691	MR Egger	17	0.00117964	0.0108724	0.915039	-0.0201303	0.0224896	1.00118	0.980071	1.02274
ebi-a-GCST90001691	gen_samplesize_1finngen_R9_O15_PRE_OR_ECLAMPSIA	outcome	|| id:ebi-a-GCST90001691	Weighted median	17	0.00470184	0.0123267	0.702879	-0.0194584	0.0288621	1.00471	0.98073	1.02928
ebi-a-GCST90001691	gen_samplesize_1finngen_R9_O15_PRE_OR_ECLAMPSIA	outcome	|| id:ebi-a-GCST90001691	Weighted mode	17	0.00421035	0.0102683	0.687219	-0.0159155	0.0243362	1.00422	0.98421	1.02463
ebi-a-GCST90001692	gen_samplesize_1finngen_R9_O15_PRE_OR_ECLAMPSIA	outcome	|| id:ebi-a-GCST90001692	Inverse variance weighted (multiplicative random effects)	13	-0.000919508	0.0107323	0.931723	-0.0219548	0.0201157	0.999081	0.978285	1.02032
ebi-a-GCST90001692	gen_samplesize_1finngen_R9_O15_PRE_OR_ECLAMPSIA	outcome	|| id:ebi-a-GCST90001692	MR Egger	13	0.00793725	0.0122223	0.529401	-0.0160184	0.0318929	1.00797	0.984109	1.03241
ebi-a-GCST90001692	gen_samplesize_1finngen_R9_O15_PRE_OR_ECLAMPSIA	outcome	|| id:ebi-a-GCST90001692	Weighted median	13	0.00110439	0.00964423	0.908831	-0.0177983	0.0200071	1.0011	0.982359	1.02021
ebi-a-GCST90001692	gen_samplesize_1finngen_R9_O15_PRE_OR_ECLAMPSIA	outcome	|| id:ebi-a-GCST90001692	Weighted mode	13	0.00195714	0.00780921	0.806348	-0.0133489	0.0172632	1.00196	0.98674	1.01741
ebi-a-GCST90001693	gen_samplesize_1finngen_R9_O15_PRE_OR_ECLAMPSIA	outcome	|| id:ebi-a-GCST90001693	Inverse variance weighted	16	0.0106429	0.00870186	0.221308	-0.00641278	0.0276985	1.0107	0.993608	1.02809
ebi-a-GCST90001693	gen_samplesize_1finngen_R9_O15_PRE_OR_ECLAMPSIA	outcome	|| id:ebi-a-GCST90001693	MR Egger	16	0.0106609	0.0101459	0.311168	-0.00922498	0.0305468	1.01072	0.990817	1.03102
ebi-a-GCST90001693	gen_samplesize_1finngen_R9_O15_PRE_OR_ECLAMPSIA	outcome	|| id:ebi-a-GCST90001693	Weighted median	16	0.00489558	0.0104411	0.639158	-0.0155689	0.0253601	1.00491	0.984552	1.02568
ebi-a-GCST90001693	gen_samplesize_1finngen_R9_O15_PRE_OR_ECLAMPSIA	outcome	|| id:ebi-a-GCST90001693	Weighted mode	16	0.00537215	0.00891998	0.555996	-0.012111	0.0228553	1.00539	0.987962	1.02312
ebi-a-GCST90001694	gen_samplesize_1finngen_R9_O15_PRE_OR_ECLAMPSIA	outcome	|| id:ebi-a-GCST90001694	Inverse variance weighted	15	-0.000138552	0.0237728	0.99535	-0.0467333	0.0464562	0.999861	0.954342	1.04755
ebi-a-GCST90001694	gen_samplesize_1finngen_R9_O15_PRE_OR_ECLAMPSIA	outcome	|| id:ebi-a-GCST90001694	MR Egger	15	0.019268	0.0336132	0.576273	-0.0466138	0.0851498	1.01945	0.954456	1.08888
ebi-a-GCST90001694	gen_samplesize_1finngen_R9_O15_PRE_OR_ECLAMPSIA	outcome	|| id:ebi-a-GCST90001694	Weighted median	15	0.0143746	0.0314297	0.647414	-0.0472275	0.0759767	1.01448	0.95387	1.07894
ebi-a-GCST90001694	gen_samplesize_1finngen_R9_O15_PRE_OR_ECLAMPSIA	outcome	|| id:ebi-a-GCST90001694	Weighted mode	15	0.0161896	0.0315487	0.615839	-0.0456458	0.0780251	1.01632	0.95538	1.08115
ebi-a-GCST90001695	gen_samplesize_1finngen_R9_O15_PRE_OR_ECLAMPSIA	outcome	|| id:ebi-a-GCST90001695	Inverse variance weighted	290	-6.80919e-07	8.02362e-06	0.932369	-1.64072e-05	1.50454e-05	0.999999	0.999984	1.00002
ebi-a-GCST90001695	gen_samplesize_1finngen_R9_O15_PRE_OR_ECLAMPSIA	outcome	|| id:ebi-a-GCST90001695	MR Egger	290	-1.1597e-05	1.03115e-05	0.261668	-3.18076e-05	8.6136e-06	0.999988	0.999968	1.00001
ebi-a-GCST90001695	gen_samplesize_1finngen_R9_O15_PRE_OR_ECLAMPSIA	outcome	|| id:ebi-a-GCST90001695	Weighted median	290	-3.34495e-06	1.37193e-05	0.807375	-3.02348e-05	2.35449e-05	0.999997	0.99997	1.00002
ebi-a-GCST90001695	gen_samplesize_1finngen_R9_O15_PRE_OR_ECLAMPSIA	outcome	|| id:ebi-a-GCST90001695	Weighted mode	290	-1.74862e-05	1.68966e-05	0.301581	-5.06035e-05	1.5631e-05	0.999983	0.999949	1.00002
ebi-a-GCST90001696	gen_samplesize_1finngen_R9_O15_PRE_OR_ECLAMPSIA	outcome	|| id:ebi-a-GCST90001696	Inverse variance weighted	37	-0.000936846	0.000440093	0.0332754	-0.00179943	-7.42635e-05	0.999064	0.998202	0.999926
ebi-a-GCST90001696	gen_samplesize_1finngen_R9_O15_PRE_OR_ECLAMPSIA	outcome	|| id:ebi-a-GCST90001696	MR Egger	37	-0.000828812	0.000526288	0.124294	-0.00186034	0.000202712	0.999172	0.998141	1.0002
ebi-a-GCST90001696	gen_samplesize_1finngen_R9_O15_PRE_OR_ECLAMPSIA	outcome	|| id:ebi-a-GCST90001696	Weighted median	37	-0.0011269	0.00058309	0.0532817	-0.00226975	1.59585e-05	0.998874	0.997733	1.00002
ebi-a-GCST90001696	gen_samplesize_1finngen_R9_O15_PRE_OR_ECLAMPSIA	outcome	|| id:ebi-a-GCST90001696	Weighted mode	37	-0.000949152	0.000474473	0.0530398	-0.00187912	-1.91836e-05	0.999051	0.998123	0.999981
ebi-a-GCST90001697	gen_samplesize_1finngen_R9_O15_PRE_OR_ECLAMPSIA	outcome	|| id:ebi-a-GCST90001697	Inverse variance weighted	141	9.43198e-05	0.000300938	0.753962	-0.000495519	0.000684159	1.00009	0.999505	1.00068
ebi-a-GCST90001697	gen_samplesize_1finngen_R9_O15_PRE_OR_ECLAMPSIA	outcome	|| id:ebi-a-GCST90001697	MR Egger	141	7.09197e-07	0.000417888	0.998648	-0.000818352	0.00081977	1	0.999182	1.00082
ebi-a-GCST90001697	gen_samplesize_1finngen_R9_O15_PRE_OR_ECLAMPSIA	outcome	|| id:ebi-a-GCST90001697	Weighted median	141	9.59132e-05	0.000502392	0.848594	-0.000888774	0.0010806	1.0001	0.999112	1.00108
ebi-a-GCST90001697	gen_samplesize_1finngen_R9_O15_PRE_OR_ECLAMPSIA	outcome	|| id:ebi-a-GCST90001697	Weighted mode	141	0.000283073	0.000438296	0.519435	-0.000575987	0.00114213	1.00028	0.999424	1.00114
ebi-a-GCST90001698	gen_samplesize_1finngen_R9_O15_PRE_OR_ECLAMPSIA	outcome	|| id:ebi-a-GCST90001698	Inverse variance weighted	641	3.01015e-06	4.85927e-06	0.535609	-6.51402e-06	1.25343e-05	1	0.999993	1.00001
ebi-a-GCST90001698	gen_samplesize_1finngen_R9_O15_PRE_OR_ECLAMPSIA	outcome	|| id:ebi-a-GCST90001698	MR Egger	641	5.94457e-06	6.49395e-06	0.360326	-6.78358e-06	1.86727e-05	1.00001	0.999993	1.00002
ebi-a-GCST90001698	gen_samplesize_1finngen_R9_O15_PRE_OR_ECLAMPSIA	outcome	|| id:ebi-a-GCST90001698	Weighted median	641	-7.86362e-06	7.93531e-06	0.321703	-2.34168e-05	7.6896e-06	0.999992	0.999977	1.00001
ebi-a-GCST90001698	gen_samplesize_1finngen_R9_O15_PRE_OR_ECLAMPSIA	outcome	|| id:ebi-a-GCST90001698	Weighted mode	641	-1.3256e-06	1.27226e-05	0.917049	-2.62618e-05	2.36106e-05	0.999999	0.999974	1.00002
ebi-a-GCST90001699	gen_samplesize_1finngen_R9_O15_PRE_OR_ECLAMPSIA	outcome	|| id:ebi-a-GCST90001699	Inverse variance weighted	19	-0.00052287	0.000325099	0.10776	-0.00116006	0.000114323	0.999477	0.998841	1.00011
ebi-a-GCST90001699	gen_samplesize_1finngen_R9_O15_PRE_OR_ECLAMPSIA	outcome	|| id:ebi-a-GCST90001699	MR Egger	19	-0.000317795	0.000349783	0.376288	-0.00100337	0.000367779	0.999682	0.998997	1.00037
ebi-a-GCST90001699	gen_samplesize_1finngen_R9_O15_PRE_OR_ECLAMPSIA	outcome	|| id:ebi-a-GCST90001699	Weighted median	19	-0.000378163	0.000423711	0.372123	-0.00120864	0.00045231	0.999622	0.998792	1.00045
ebi-a-GCST90001699	gen_samplesize_1finngen_R9_O15_PRE_OR_ECLAMPSIA	outcome	|| id:ebi-a-GCST90001699	Weighted mode	19	-0.000481287	0.000337108	0.1705	-0.00114202	0.000179444	0.999519	0.998859	1.00018
ebi-a-GCST90001700	gen_samplesize_1finngen_R9_O15_PRE_OR_ECLAMPSIA	outcome	|| id:ebi-a-GCST90001700	Inverse variance weighted	165	0.000264312	0.000211163	0.210679	-0.000149567	0.000678191	1.00026	0.99985	1.00068
ebi-a-GCST90001700	gen_samplesize_1finngen_R9_O15_PRE_OR_ECLAMPSIA	outcome	|| id:ebi-a-GCST90001700	MR Egger	165	0.00035023	0.000298283	0.242045	-0.000234403	0.000934864	1.00035	0.999766	1.00094
ebi-a-GCST90001700	gen_samplesize_1finngen_R9_O15_PRE_OR_ECLAMPSIA	outcome	|| id:ebi-a-GCST90001700	Weighted median	165	-0.000336158	0.000331001	0.30983	-0.000984921	0.000312605	0.999664	0.999016	1.00031
ebi-a-GCST90001700	gen_samplesize_1finngen_R9_O15_PRE_OR_ECLAMPSIA	outcome	|| id:ebi-a-GCST90001700	Weighted mode	165	-1.41725e-05	0.000295604	0.961819	-0.000593557	0.000565212	0.999986	0.999407	1.00057
ebi-a-GCST90001701	gen_samplesize_1finngen_R9_O15_PRE_OR_ECLAMPSIA	outcome	|| id:ebi-a-GCST90001701	Inverse variance weighted	8	-0.00733113	0.0372278	0.843885	-0.0802977	0.0656354	0.992696	0.922842	1.06784
ebi-a-GCST90001701	gen_samplesize_1finngen_R9_O15_PRE_OR_ECLAMPSIA	outcome	|| id:ebi-a-GCST90001701	MR Egger	8	0.0571382	0.0738752	0.468628	-0.0876572	0.201934	1.0588	0.916075	1.22377
ebi-a-GCST90001701	gen_samplesize_1finngen_R9_O15_PRE_OR_ECLAMPSIA	outcome	|| id:ebi-a-GCST90001701	Weighted median	8	-0.021202	0.0422179	0.615523	-0.103949	0.061545	0.979021	0.901271	1.06348
ebi-a-GCST90001701	gen_samplesize_1finngen_R9_O15_PRE_OR_ECLAMPSIA	outcome	|| id:ebi-a-GCST90001701	Weighted mode	8	-0.0508492	0.0666266	0.47028	-0.181437	0.079739	0.950422	0.83407	1.083
ebi-a-GCST90001702	gen_samplesize_1finngen_R9_O15_PRE_OR_ECLAMPSIA	outcome	|| id:ebi-a-GCST90001702	Inverse variance weighted	15	0.015235	0.0196386	0.437886	-0.0232567	0.0537267	1.01535	0.977012	1.0552
ebi-a-GCST90001702	gen_samplesize_1finngen_R9_O15_PRE_OR_ECLAMPSIA	outcome	|| id:ebi-a-GCST90001702	MR Egger	15	0.0393136	0.0268818	0.167366	-0.0133746	0.0920018	1.0401	0.986714	1.09637
ebi-a-GCST90001702	gen_samplesize_1finngen_R9_O15_PRE_OR_ECLAMPSIA	outcome	|| id:ebi-a-GCST90001702	Weighted median	15	0.0303288	0.0189171	0.108879	-0.00674862	0.0674063	1.03079	0.993274	1.06973
ebi-a-GCST90001702	gen_samplesize_1finngen_R9_O15_PRE_OR_ECLAMPSIA	outcome	|| id:ebi-a-GCST90001702	Weighted mode	15	0.0350575	0.0172695	0.0618027	0.00120929	0.0689057	1.03568	1.00121	1.07134
ebi-a-GCST90001703	gen_samplesize_1finngen_R9_O15_PRE_OR_ECLAMPSIA	outcome	|| id:ebi-a-GCST90001703	Inverse variance weighted	12	0.0162051	0.0207112	0.43396	-0.0243888	0.056799	1.01634	0.975906	1.05844
ebi-a-GCST90001703	gen_samplesize_1finngen_R9_O15_PRE_OR_ECLAMPSIA	outcome	|| id:ebi-a-GCST90001703	MR Egger	12	0.043018	0.0266492	0.137551	-0.00921441	0.0952504	1.04396	0.990828	1.09993
ebi-a-GCST90001703	gen_samplesize_1finngen_R9_O15_PRE_OR_ECLAMPSIA	outcome	|| id:ebi-a-GCST90001703	Weighted median	12	0.0310821	0.0190452	0.102676	-0.00624652	0.0684107	1.03157	0.993773	1.07081
ebi-a-GCST90001703	gen_samplesize_1finngen_R9_O15_PRE_OR_ECLAMPSIA	outcome	|| id:ebi-a-GCST90001703	Weighted mode	12	0.03555	0.0185405	0.081508	-0.000789346	0.0718894	1.03619	0.999211	1.07454
ebi-a-GCST90001704	gen_samplesize_1finngen_R9_O15_PRE_OR_ECLAMPSIA	outcome	|| id:ebi-a-GCST90001704	Inverse variance weighted	17	0.00429261	0.0186113	0.81759	-0.0321856	0.0407708	1.0043	0.968327	1.04161
ebi-a-GCST90001704	gen_samplesize_1finngen_R9_O15_PRE_OR_ECLAMPSIA	outcome	|| id:ebi-a-GCST90001704	MR Egger	17	0.0406363	0.0216801	0.0804911	-0.0018567	0.0831294	1.04147	0.998145	1.08668
ebi-a-GCST90001704	gen_samplesize_1finngen_R9_O15_PRE_OR_ECLAMPSIA	outcome	|| id:ebi-a-GCST90001704	Weighted median	17	0.0257229	0.0192998	0.182595	-0.0121046	0.0635504	1.02606	0.987968	1.06561
ebi-a-GCST90001704	gen_samplesize_1finngen_R9_O15_PRE_OR_ECLAMPSIA	outcome	|| id:ebi-a-GCST90001704	Weighted mode	17	0.0295547	0.0176734	0.113909	-0.00508521	0.0641946	1.03	0.994928	1.0663
ebi-a-GCST90001705	gen_samplesize_1finngen_R9_O15_PRE_OR_ECLAMPSIA	outcome	|| id:ebi-a-GCST90001705	Inverse variance weighted (multiplicative random effects)	13	0.0118029	0.0203643	0.562193	-0.0281112	0.051717	1.01187	0.97228	1.05308
ebi-a-GCST90001705	gen_samplesize_1finngen_R9_O15_PRE_OR_ECLAMPSIA	outcome	|| id:ebi-a-GCST90001705	MR Egger	13	0.0342447	0.026851	0.228458	-0.0183833	0.0868727	1.03484	0.981785	1.09076
ebi-a-GCST90001705	gen_samplesize_1finngen_R9_O15_PRE_OR_ECLAMPSIA	outcome	|| id:ebi-a-GCST90001705	Weighted median	13	0.029796	0.0186017	0.109202	-0.00666328	0.0662552	1.03024	0.993359	1.0685
ebi-a-GCST90001705	gen_samplesize_1finngen_R9_O15_PRE_OR_ECLAMPSIA	outcome	|| id:ebi-a-GCST90001705	Weighted mode	13	0.0341495	0.0181999	0.0851306	-0.00152228	0.0698213	1.03474	0.998479	1.07232
ebi-a-GCST90001706	gen_samplesize_1finngen_R9_O15_PRE_OR_ECLAMPSIA	outcome	|| id:ebi-a-GCST90001706	Inverse variance weighted	17	0.0255562	0.0146199	0.0804563	-0.00309877	0.0542112	1.02589	0.996906	1.05571
ebi-a-GCST90001706	gen_samplesize_1finngen_R9_O15_PRE_OR_ECLAMPSIA	outcome	|| id:ebi-a-GCST90001706	MR Egger	17	0.0693036	0.0232594	0.00935326	0.0237152	0.114892	1.07176	1.024	1.12175
ebi-a-GCST90001706	gen_samplesize_1finngen_R9_O15_PRE_OR_ECLAMPSIA	outcome	|| id:ebi-a-GCST90001706	Weighted median	17	0.0434818	0.0185083	0.018808	0.00720555	0.0797581	1.04444	1.00723	1.08303
ebi-a-GCST90001706	gen_samplesize_1finngen_R9_O15_PRE_OR_ECLAMPSIA	outcome	|| id:ebi-a-GCST90001706	Weighted mode	17	0.0505932	0.0188956	0.0165147	0.0135578	0.0876285	1.05189	1.01365	1.09158
ebi-a-GCST90001707	gen_samplesize_1finngen_R9_O15_PRE_OR_ECLAMPSIA	outcome	|| id:ebi-a-GCST90001707	Inverse variance weighted	13	0.0189625	0.0194952	0.330716	-0.0192482	0.0571731	1.01914	0.980936	1.05884
ebi-a-GCST90001707	gen_samplesize_1finngen_R9_O15_PRE_OR_ECLAMPSIA	outcome	|| id:ebi-a-GCST90001707	MR Egger	13	0.0555986	0.0248943	0.0472453	0.00680579	0.104391	1.05717	1.00683	1.11003
ebi-a-GCST90001707	gen_samplesize_1finngen_R9_O15_PRE_OR_ECLAMPSIA	outcome	|| id:ebi-a-GCST90001707	Weighted median	13	0.0415666	0.0203978	0.0415702	0.0015869	0.0815464	1.04244	1.00159	1.08496
ebi-a-GCST90001707	gen_samplesize_1finngen_R9_O15_PRE_OR_ECLAMPSIA	outcome	|| id:ebi-a-GCST90001707	Weighted mode	13	0.0447993	0.0201916	0.0465465	0.00522372	0.0843748	1.04582	1.00524	1.08804
ebi-a-GCST90001708	gen_samplesize_1finngen_R9_O15_PRE_OR_ECLAMPSIA	outcome	|| id:ebi-a-GCST90001708	Inverse variance weighted (multiplicative random effects)	20	0.00647959	0.0195334	0.740102	-0.0318059	0.044765	1.0065	0.968695	1.04578
ebi-a-GCST90001708	gen_samplesize_1finngen_R9_O15_PRE_OR_ECLAMPSIA	outcome	|| id:ebi-a-GCST90001708	MR Egger	20	0.0413355	0.0269237	0.142105	-0.0114349	0.0941059	1.0422	0.98863	1.09868
ebi-a-GCST90001708	gen_samplesize_1finngen_R9_O15_PRE_OR_ECLAMPSIA	outcome	|| id:ebi-a-GCST90001708	Weighted median	20	0.0454376	0.020517	0.0267851	0.00522435	0.0856509	1.04649	1.00524	1.08943
ebi-a-GCST90001708	gen_samplesize_1finngen_R9_O15_PRE_OR_ECLAMPSIA	outcome	|| id:ebi-a-GCST90001708	Weighted mode	20	0.0415036	0.0182276	0.0345425	0.00577751	0.0772298	1.04238	1.00579	1.08029
ebi-a-GCST90001709	gen_samplesize_1finngen_R9_O15_PRE_OR_ECLAMPSIA	outcome	|| id:ebi-a-GCST90001709	Inverse variance weighted (multiplicative random effects)	17	0.0103653	0.0198124	0.600854	-0.028467	0.0491976	1.01042	0.971934	1.05043
ebi-a-GCST90001709	gen_samplesize_1finngen_R9_O15_PRE_OR_ECLAMPSIA	outcome	|| id:ebi-a-GCST90001709	MR Egger	17	0.0498174	0.0243435	0.0586564	0.00210422	0.0975306	1.05108	1.00211	1.10245
ebi-a-GCST90001709	gen_samplesize_1finngen_R9_O15_PRE_OR_ECLAMPSIA	outcome	|| id:ebi-a-GCST90001709	Weighted median	17	0.0288895	0.018336	0.115128	-0.00704916	0.0648281	1.02931	0.992976	1.06698
ebi-a-GCST90001709	gen_samplesize_1finngen_R9_O15_PRE_OR_ECLAMPSIA	outcome	|| id:ebi-a-GCST90001709	Weighted mode	17	0.033544	0.0177616	0.0772166	-0.00126866	0.0683567	1.03411	0.998732	1.07075
ebi-a-GCST90001710	gen_samplesize_1finngen_R9_O15_PRE_OR_ECLAMPSIA	outcome	|| id:ebi-a-GCST90001710	Inverse variance weighted (multiplicative random effects)	14	0.0148585	0.0239575	0.535125	-0.0320982	0.0618151	1.01497	0.968412	1.06377
ebi-a-GCST90001710	gen_samplesize_1finngen_R9_O15_PRE_OR_ECLAMPSIA	outcome	|| id:ebi-a-GCST90001710	MR Egger	14	0.0305211	0.0326892	0.368879	-0.0335498	0.094592	1.03099	0.967007	1.09921
ebi-a-GCST90001710	gen_samplesize_1finngen_R9_O15_PRE_OR_ECLAMPSIA	outcome	|| id:ebi-a-GCST90001710	Weighted median	14	0.0279544	0.0205052	0.172793	-0.0122358	0.0681445	1.02835	0.987839	1.07052
ebi-a-GCST90001710	gen_samplesize_1finngen_R9_O15_PRE_OR_ECLAMPSIA	outcome	|| id:ebi-a-GCST90001710	Weighted mode	14	0.038634	0.0220696	0.103569	-0.00462237	0.0818904	1.03939	0.995388	1.08534
ebi-a-GCST90001711	gen_samplesize_1finngen_R9_O15_PRE_OR_ECLAMPSIA	outcome	|| id:ebi-a-GCST90001711	Inverse variance weighted (multiplicative random effects)	13	0.0185663	0.0239024	0.437303	-0.0282823	0.065415	1.01874	0.972114	1.0676
ebi-a-GCST90001711	gen_samplesize_1finngen_R9_O15_PRE_OR_ECLAMPSIA	outcome	|| id:ebi-a-GCST90001711	MR Egger	13	0.041399	0.031774	0.219216	-0.0208779	0.103676	1.04227	0.979339	1.10924
ebi-a-GCST90001711	gen_samplesize_1finngen_R9_O15_PRE_OR_ECLAMPSIA	outcome	|| id:ebi-a-GCST90001711	Weighted median	13	0.0343965	0.0199157	0.0841481	-0.00463819	0.0734313	1.03499	0.995373	1.07619
ebi-a-GCST90001711	gen_samplesize_1finngen_R9_O15_PRE_OR_ECLAMPSIA	outcome	|| id:ebi-a-GCST90001711	Weighted mode	13	0.0458949	0.0220738	0.0597116	0.00263033	0.0891595	1.04696	1.00263	1.09326
ebi-a-GCST90001712	gen_samplesize_1finngen_R9_O15_PRE_OR_ECLAMPSIA	outcome	|| id:ebi-a-GCST90001712	Inverse variance weighted	11	0.0167644	0.0211173	0.427271	-0.0246255	0.0581544	1.01691	0.975675	1.05988
ebi-a-GCST90001712	gen_samplesize_1finngen_R9_O15_PRE_OR_ECLAMPSIA	outcome	|| id:ebi-a-GCST90001712	MR Egger	11	0.0474591	0.0268284	0.110683	-0.00512458	0.100043	1.0486	0.994889	1.10522
ebi-a-GCST90001712	gen_samplesize_1finngen_R9_O15_PRE_OR_ECLAMPSIA	outcome	|| id:ebi-a-GCST90001712	Weighted median	11	0.0313624	0.0192036	0.102437	-0.00627669	0.0690015	1.03186	0.993743	1.07144
ebi-a-GCST90001712	gen_samplesize_1finngen_R9_O15_PRE_OR_ECLAMPSIA	outcome	|| id:ebi-a-GCST90001712	Weighted mode	11	0.0363841	0.0176197	0.0658371	0.00184946	0.0709188	1.03705	1.00185	1.07349
ebi-a-GCST90001713	gen_samplesize_1finngen_R9_O15_PRE_OR_ECLAMPSIA	outcome	|| id:ebi-a-GCST90001713	Inverse variance weighted	9	0.138824	0.0443844	0.00176143	0.0518304	0.225817	1.14892	1.0532	1.25335
ebi-a-GCST90001713	gen_samplesize_1finngen_R9_O15_PRE_OR_ECLAMPSIA	outcome	|| id:ebi-a-GCST90001713	MR Egger	9	0.134191	0.0904413	0.181451	-0.0430745	0.311456	1.14361	0.95784	1.36541
ebi-a-GCST90001713	gen_samplesize_1finngen_R9_O15_PRE_OR_ECLAMPSIA	outcome	|| id:ebi-a-GCST90001713	Weighted median	9	0.147511	0.0514676	0.00415563	0.0466349	0.248388	1.15895	1.04774	1.28196
ebi-a-GCST90001713	gen_samplesize_1finngen_R9_O15_PRE_OR_ECLAMPSIA	outcome	|| id:ebi-a-GCST90001713	Weighted mode	9	0.157339	0.0576463	0.0258706	0.0443519	0.270325	1.17039	1.04535	1.31039
ebi-a-GCST90001714	gen_samplesize_1finngen_R9_O15_PRE_OR_ECLAMPSIA	outcome	|| id:ebi-a-GCST90001714	Inverse variance weighted	2	-0.015639	0.0561923	0.780773	-0.125776	0.094498	0.984483	0.881812	1.09911
ebi-a-GCST90001715	gen_samplesize_1finngen_R9_O15_PRE_OR_ECLAMPSIA	outcome	|| id:ebi-a-GCST90001715	Inverse variance weighted (multiplicative random effects)	13	0.0139627	0.0202651	0.490823	-0.025757	0.0536824	1.01406	0.974572	1.05515
ebi-a-GCST90001715	gen_samplesize_1finngen_R9_O15_PRE_OR_ECLAMPSIA	outcome	|| id:ebi-a-GCST90001715	MR Egger	13	0.044225	0.0257605	0.114008	-0.00626563	0.0947156	1.04522	0.993754	1.09935
ebi-a-GCST90001715	gen_samplesize_1finngen_R9_O15_PRE_OR_ECLAMPSIA	outcome	|| id:ebi-a-GCST90001715	Weighted median	13	0.0290426	0.0189609	0.125595	-0.0081209	0.066206	1.02947	0.991912	1.06845
ebi-a-GCST90001715	gen_samplesize_1finngen_R9_O15_PRE_OR_ECLAMPSIA	outcome	|| id:ebi-a-GCST90001715	Weighted mode	13	0.0332869	0.0186672	0.0998488	-0.00330076	0.0698747	1.03385	0.996705	1.07237
ebi-a-GCST90001716	gen_samplesize_1finngen_R9_O15_PRE_OR_ECLAMPSIA	outcome	|| id:ebi-a-GCST90001716	Inverse variance weighted (multiplicative random effects)	17	0.00861721	0.0210039	0.68161	-0.0325504	0.0497848	1.00865	0.967974	1.05104
ebi-a-GCST90001716	gen_samplesize_1finngen_R9_O15_PRE_OR_ECLAMPSIA	outcome	|| id:ebi-a-GCST90001716	MR Egger	17	0.0462835	0.026376	0.0996989	-0.0054135	0.0979805	1.04737	0.994601	1.10294
ebi-a-GCST90001716	gen_samplesize_1finngen_R9_O15_PRE_OR_ECLAMPSIA	outcome	|| id:ebi-a-GCST90001716	Weighted median	17	0.0202802	0.0194328	0.296669	-0.0178082	0.0583685	1.02049	0.982349	1.06011
ebi-a-GCST90001716	gen_samplesize_1finngen_R9_O15_PRE_OR_ECLAMPSIA	outcome	|| id:ebi-a-GCST90001716	Weighted mode	17	0.0363487	0.0195678	0.0817318	-0.00200426	0.0747016	1.03702	0.997998	1.07756
ebi-a-GCST90001717	gen_samplesize_1finngen_R9_O15_PRE_OR_ECLAMPSIA	outcome	|| id:ebi-a-GCST90001717	Inverse variance weighted (multiplicative random effects)	12	0.0188597	0.0212644	0.375126	-0.0228186	0.060538	1.01904	0.97744	1.06241
ebi-a-GCST90001717	gen_samplesize_1finngen_R9_O15_PRE_OR_ECLAMPSIA	outcome	|| id:ebi-a-GCST90001717	MR Egger	12	0.0392415	0.029282	0.209858	-0.0181512	0.0966343	1.04002	0.982013	1.10146
ebi-a-GCST90001717	gen_samplesize_1finngen_R9_O15_PRE_OR_ECLAMPSIA	outcome	|| id:ebi-a-GCST90001717	Weighted median	12	0.0319701	0.0186965	0.0872738	-0.00467492	0.0686152	1.03249	0.995336	1.07102
ebi-a-GCST90001717	gen_samplesize_1finngen_R9_O15_PRE_OR_ECLAMPSIA	outcome	|| id:ebi-a-GCST90001717	Weighted mode	12	0.036292	0.0180677	0.0697605	0.000879198	0.0717048	1.03696	1.00088	1.07434
ebi-a-GCST90001718	gen_samplesize_1finngen_R9_O15_PRE_OR_ECLAMPSIA	outcome	|| id:ebi-a-GCST90001718	Inverse variance weighted (multiplicative random effects)	13	0.0128023	0.0233432	0.583392	-0.0329505	0.0585551	1.01288	0.967586	1.0603
ebi-a-GCST90001718	gen_samplesize_1finngen_R9_O15_PRE_OR_ECLAMPSIA	outcome	|| id:ebi-a-GCST90001718	MR Egger	13	0.0572156	0.0286804	0.0714206	0.00100201	0.113429	1.05888	1.001	1.12011
ebi-a-GCST90001718	gen_samplesize_1finngen_R9_O15_PRE_OR_ECLAMPSIA	outcome	|| id:ebi-a-GCST90001718	Weighted median	13	0.0314246	0.0204259	0.123934	-0.00861014	0.0714592	1.03192	0.991427	1.07407
ebi-a-GCST90001718	gen_samplesize_1finngen_R9_O15_PRE_OR_ECLAMPSIA	outcome	|| id:ebi-a-GCST90001718	Weighted mode	13	0.041307	0.0200741	0.0620191	0.00196185	0.0806522	1.04217	1.00196	1.08399
ebi-a-GCST90001719	gen_samplesize_1finngen_R9_O15_PRE_OR_ECLAMPSIA	outcome	|| id:ebi-a-GCST90001719	Inverse variance weighted	14	0.0052206	0.0207425	0.801284	-0.0354347	0.0458759	1.00523	0.965186	1.04694
ebi-a-GCST90001719	gen_samplesize_1finngen_R9_O15_PRE_OR_ECLAMPSIA	outcome	|| id:ebi-a-GCST90001719	MR Egger	14	0.0472724	0.022769	0.060028	0.00264523	0.0918997	1.04841	1.00265	1.09625
ebi-a-GCST90001719	gen_samplesize_1finngen_R9_O15_PRE_OR_ECLAMPSIA	outcome	|| id:ebi-a-GCST90001719	Weighted median	14	0.0209736	0.0189604	0.268649	-0.0161887	0.0581359	1.0212	0.983942	1.05986
ebi-a-GCST90001719	gen_samplesize_1finngen_R9_O15_PRE_OR_ECLAMPSIA	outcome	|| id:ebi-a-GCST90001719	Weighted mode	14	0.0398514	0.0175281	0.0405991	0.00549635	0.0742065	1.04066	1.00551	1.07703
ebi-a-GCST90001720	gen_samplesize_1finngen_R9_O15_PRE_OR_ECLAMPSIA	outcome	|| id:ebi-a-GCST90001720	Inverse variance weighted	18	0.00138657	0.0197413	0.944005	-0.0373064	0.0400796	1.00139	0.963381	1.04089
ebi-a-GCST90001720	gen_samplesize_1finngen_R9_O15_PRE_OR_ECLAMPSIA	outcome	|| id:ebi-a-GCST90001720	MR Egger	18	0.0492577	0.0256112	0.0724259	-0.000940316	0.0994557	1.05049	0.99906	1.10457
ebi-a-GCST90001720	gen_samplesize_1finngen_R9_O15_PRE_OR_ECLAMPSIA	outcome	|| id:ebi-a-GCST90001720	Weighted median	18	0.044979	0.0213306	0.034974	0.00317099	0.086787	1.04601	1.00318	1.09066
ebi-a-GCST90001720	gen_samplesize_1finngen_R9_O15_PRE_OR_ECLAMPSIA	outcome	|| id:ebi-a-GCST90001720	Weighted mode	18	0.0361384	0.0202974	0.0928806	-0.00364442	0.0759213	1.0368	0.996362	1.07888
ebi-a-GCST90001721	gen_samplesize_1finngen_R9_O15_PRE_OR_ECLAMPSIA	outcome	|| id:ebi-a-GCST90001721	Inverse variance weighted	7	0.045669	0.0297082	0.124231	-0.012559	0.103897	1.04673	0.98752	1.10949
ebi-a-GCST90001721	gen_samplesize_1finngen_R9_O15_PRE_OR_ECLAMPSIA	outcome	|| id:ebi-a-GCST90001721	MR Egger	7	0.0168148	0.0367614	0.666568	-0.0552374	0.0888671	1.01696	0.94626	1.09294
ebi-a-GCST90001721	gen_samplesize_1finngen_R9_O15_PRE_OR_ECLAMPSIA	outcome	|| id:ebi-a-GCST90001721	Weighted median	7	0.0290851	0.0343065	0.396548	-0.0381556	0.0963258	1.02951	0.962563	1.10112
ebi-a-GCST90001721	gen_samplesize_1finngen_R9_O15_PRE_OR_ECLAMPSIA	outcome	|| id:ebi-a-GCST90001721	Weighted mode	7	0.0282875	0.0357617	0.45906	-0.0418054	0.0983805	1.02869	0.959056	1.10338
ebi-a-GCST90001722	gen_samplesize_1finngen_R9_O15_PRE_OR_ECLAMPSIA	outcome	|| id:ebi-a-GCST90001722	Inverse variance weighted	12	0.0179667	0.0332723	0.589205	-0.047247	0.0831803	1.01813	0.953852	1.08674
ebi-a-GCST90001722	gen_samplesize_1finngen_R9_O15_PRE_OR_ECLAMPSIA	outcome	|| id:ebi-a-GCST90001722	MR Egger	12	0.057276	0.0534831	0.309372	-0.0475509	0.162103	1.05895	0.953562	1.17598
ebi-a-GCST90001722	gen_samplesize_1finngen_R9_O15_PRE_OR_ECLAMPSIA	outcome	|| id:ebi-a-GCST90001722	Weighted median	12	0.023589	0.0478643	0.622133	-0.0702251	0.117403	1.02387	0.932184	1.12457
ebi-a-GCST90001722	gen_samplesize_1finngen_R9_O15_PRE_OR_ECLAMPSIA	outcome	|| id:ebi-a-GCST90001722	Weighted mode	12	0.0327568	0.0449651	0.481533	-0.0553748	0.120888	1.0333	0.946131	1.1285
ebi-a-GCST90001723	gen_samplesize_1finngen_R9_O15_PRE_OR_ECLAMPSIA	outcome	|| id:ebi-a-GCST90001723	Inverse variance weighted	24	-0.0257307	0.0235904	0.275393	-0.071968	0.0205065	0.974597	0.930561	1.02072
ebi-a-GCST90001723	gen_samplesize_1finngen_R9_O15_PRE_OR_ECLAMPSIA	outcome	|| id:ebi-a-GCST90001723	MR Egger	24	-0.0681846	0.0321851	0.045661	-0.131267	-0.00510182	0.934088	0.876983	0.994911
ebi-a-GCST90001723	gen_samplesize_1finngen_R9_O15_PRE_OR_ECLAMPSIA	outcome	|| id:ebi-a-GCST90001723	Weighted median	24	-0.0433035	0.0314179	0.168109	-0.104883	0.0182757	0.957621	0.90043	1.01844
ebi-a-GCST90001723	gen_samplesize_1finngen_R9_O15_PRE_OR_ECLAMPSIA	outcome	|| id:ebi-a-GCST90001723	Weighted mode	24	-0.0487031	0.0287917	0.104235	-0.105135	0.00772859	0.952464	0.900203	1.00776
ebi-a-GCST90001724	gen_samplesize_1finngen_R9_O15_PRE_OR_ECLAMPSIA	outcome	|| id:ebi-a-GCST90001724	Inverse variance weighted	19	0.015416	0.0186371	0.40814	-0.0211126	0.0519447	1.01554	0.979109	1.05332
ebi-a-GCST90001724	gen_samplesize_1finngen_R9_O15_PRE_OR_ECLAMPSIA	outcome	|| id:ebi-a-GCST90001724	MR Egger	19	0.0188953	0.022933	0.421386	-0.0260533	0.0638439	1.01907	0.974283	1.06593
ebi-a-GCST90001724	gen_samplesize_1finngen_R9_O15_PRE_OR_ECLAMPSIA	outcome	|| id:ebi-a-GCST90001724	Weighted median	19	0.0300629	0.0208046	0.148453	-0.010714	0.0708399	1.03052	0.989343	1.07341
ebi-a-GCST90001724	gen_samplesize_1finngen_R9_O15_PRE_OR_ECLAMPSIA	outcome	|| id:ebi-a-GCST90001724	Weighted mode	19	0.0209227	0.0167176	0.226759	-0.0118438	0.0536892	1.02114	0.988226	1.05516
ebi-a-GCST90001725	gen_samplesize_1finngen_R9_O15_PRE_OR_ECLAMPSIA	outcome	|| id:ebi-a-GCST90001725	Inverse variance weighted	19	0.0027543	0.0109957	0.80221	-0.0187973	0.0243059	1.00276	0.981378	1.0246
ebi-a-GCST90001725	gen_samplesize_1finngen_R9_O15_PRE_OR_ECLAMPSIA	outcome	|| id:ebi-a-GCST90001725	MR Egger	19	-0.00268851	0.0128462	0.836713	-0.0278671	0.02249	0.997315	0.972518	1.02274
ebi-a-GCST90001725	gen_samplesize_1finngen_R9_O15_PRE_OR_ECLAMPSIA	outcome	|| id:ebi-a-GCST90001725	Weighted median	19	0.00186258	0.0142677	0.896135	-0.0261022	0.0298273	1.00186	0.974236	1.03028
ebi-a-GCST90001725	gen_samplesize_1finngen_R9_O15_PRE_OR_ECLAMPSIA	outcome	|| id:ebi-a-GCST90001725	Weighted mode	19	-0.000499321	0.0130937	0.97	-0.026163	0.0251643	0.999501	0.974176	1.02548
ebi-a-GCST90001726	gen_samplesize_1finngen_R9_O15_PRE_OR_ECLAMPSIA	outcome	|| id:ebi-a-GCST90001726	Inverse variance weighted	13	0.0536672	0.0313159	0.0865768	-0.0077119	0.115046	1.05513	0.992318	1.12193
ebi-a-GCST90001726	gen_samplesize_1finngen_R9_O15_PRE_OR_ECLAMPSIA	outcome	|| id:ebi-a-GCST90001726	MR Egger	13	0.0257488	0.0474904	0.598499	-0.0673323	0.11883	1.02608	0.934884	1.12618
ebi-a-GCST90001726	gen_samplesize_1finngen_R9_O15_PRE_OR_ECLAMPSIA	outcome	|| id:ebi-a-GCST90001726	Weighted median	13	0.0258594	0.0436151	0.553248	-0.0596262	0.111345	1.0262	0.942117	1.11778
ebi-a-GCST90001726	gen_samplesize_1finngen_R9_O15_PRE_OR_ECLAMPSIA	outcome	|| id:ebi-a-GCST90001726	Weighted mode	13	0.0242165	0.0392323	0.548598	-0.0526789	0.101112	1.02451	0.948685	1.1064
ebi-a-GCST90001727	gen_samplesize_1finngen_R9_O15_PRE_OR_ECLAMPSIA	outcome	|| id:ebi-a-GCST90001727	Inverse variance weighted	9	-0.000365038	0.0146027	0.980057	-0.0289864	0.0282563	0.999635	0.97143	1.02866
ebi-a-GCST90001727	gen_samplesize_1finngen_R9_O15_PRE_OR_ECLAMPSIA	outcome	|| id:ebi-a-GCST90001727	MR Egger	9	0.00380509	0.0177894	0.836725	-0.0310622	0.0386723	1.00381	0.969415	1.03943
ebi-a-GCST90001727	gen_samplesize_1finngen_R9_O15_PRE_OR_ECLAMPSIA	outcome	|| id:ebi-a-GCST90001727	Weighted median	9	0.00174374	0.0128652	0.892186	-0.0234721	0.0269596	1.00175	0.976801	1.02733
ebi-a-GCST90001727	gen_samplesize_1finngen_R9_O15_PRE_OR_ECLAMPSIA	outcome	|| id:ebi-a-GCST90001727	Weighted mode	9	0.00179739	0.0111419	0.875842	-0.0200406	0.0236354	1.0018	0.980159	1.02392
ebi-a-GCST90001728	gen_samplesize_1finngen_R9_O15_PRE_OR_ECLAMPSIA	outcome	|| id:ebi-a-GCST90001728	Inverse variance weighted	15	0.00815527	0.0119602	0.495321	-0.0152866	0.0315972	1.00819	0.98483	1.0321
ebi-a-GCST90001728	gen_samplesize_1finngen_R9_O15_PRE_OR_ECLAMPSIA	outcome	|| id:ebi-a-GCST90001728	MR Egger	15	0.00526276	0.0180486	0.775202	-0.0301124	0.0406379	1.00528	0.970336	1.04147
ebi-a-GCST90001728	gen_samplesize_1finngen_R9_O15_PRE_OR_ECLAMPSIA	outcome	|| id:ebi-a-GCST90001728	Weighted median	15	-0.00521763	0.0153585	0.734066	-0.0353203	0.024885	0.994796	0.965296	1.0252
ebi-a-GCST90001728	gen_samplesize_1finngen_R9_O15_PRE_OR_ECLAMPSIA	outcome	|| id:ebi-a-GCST90001728	Weighted mode	15	-0.000404041	0.0148699	0.978706	-0.029549	0.0287409	0.999596	0.970883	1.02916
ebi-a-GCST90001729	gen_samplesize_1finngen_R9_O15_PRE_OR_ECLAMPSIA	outcome	|| id:ebi-a-GCST90001729	Inverse variance weighted	13	-0.00644734	0.0240417	0.788566	-0.0535691	0.0406744	0.993573	0.94784	1.04151
ebi-a-GCST90001729	gen_samplesize_1finngen_R9_O15_PRE_OR_ECLAMPSIA	outcome	|| id:ebi-a-GCST90001729	MR Egger	13	-0.0227701	0.0330584	0.505226	-0.0875645	0.0420242	0.977487	0.91616	1.04292
ebi-a-GCST90001729	gen_samplesize_1finngen_R9_O15_PRE_OR_ECLAMPSIA	outcome	|| id:ebi-a-GCST90001729	Weighted median	13	-0.0204283	0.0300553	0.496699	-0.0793366	0.03848	0.979779	0.923729	1.03923
ebi-a-GCST90001729	gen_samplesize_1finngen_R9_O15_PRE_OR_ECLAMPSIA	outcome	|| id:ebi-a-GCST90001729	Weighted mode	13	-0.0215777	0.0254046	0.412306	-0.0713707	0.0282154	0.978653	0.931117	1.02862
ebi-a-GCST90001730	gen_samplesize_1finngen_R9_O15_PRE_OR_ECLAMPSIA	outcome	|| id:ebi-a-GCST90001730	Inverse variance weighted	14	0.000189427	0.0117543	0.987142	-0.0228491	0.0232279	1.00019	0.97741	1.0235
ebi-a-GCST90001730	gen_samplesize_1finngen_R9_O15_PRE_OR_ECLAMPSIA	outcome	|| id:ebi-a-GCST90001730	MR Egger	14	-0.00827138	0.0138293	0.560889	-0.0353768	0.0188341	0.991763	0.965242	1.01901
ebi-a-GCST90001730	gen_samplesize_1finngen_R9_O15_PRE_OR_ECLAMPSIA	outcome	|| id:ebi-a-GCST90001730	Weighted median	14	0.000492464	0.0139566	0.971852	-0.0268625	0.0278474	1.00049	0.973495	1.02824
ebi-a-GCST90001730	gen_samplesize_1finngen_R9_O15_PRE_OR_ECLAMPSIA	outcome	|| id:ebi-a-GCST90001730	Weighted mode	14	-0.000311179	0.012072	0.979827	-0.0239723	0.0233499	0.999689	0.976313	1.02362
ebi-a-GCST90001731	gen_samplesize_1finngen_R9_O15_PRE_OR_ECLAMPSIA	outcome	|| id:ebi-a-GCST90001731	Inverse variance weighted	10	-0.0189341	0.0408265	0.642812	-0.098954	0.0610858	0.981244	0.905784	1.06299
ebi-a-GCST90001731	gen_samplesize_1finngen_R9_O15_PRE_OR_ECLAMPSIA	outcome	|| id:ebi-a-GCST90001731	MR Egger	10	0.0786404	0.0636548	0.251721	-0.0461229	0.203404	1.08182	0.954925	1.22557
ebi-a-GCST90001731	gen_samplesize_1finngen_R9_O15_PRE_OR_ECLAMPSIA	outcome	|| id:ebi-a-GCST90001731	Weighted median	10	0.00295972	0.0499274	0.952729	-0.0948979	0.100817	1.00296	0.909466	1.10607
ebi-a-GCST90001731	gen_samplesize_1finngen_R9_O15_PRE_OR_ECLAMPSIA	outcome	|| id:ebi-a-GCST90001731	Weighted mode	10	0.0115343	0.0551427	0.838972	-0.0965453	0.119614	1.0116	0.907969	1.12706
ebi-a-GCST90001732	gen_samplesize_1finngen_R9_O15_PRE_OR_ECLAMPSIA	outcome	|| id:ebi-a-GCST90001732	Inverse variance weighted	14	-0.0258394	0.0387867	0.505287	-0.101861	0.0501824	0.974492	0.903155	1.05146
ebi-a-GCST90001732	gen_samplesize_1finngen_R9_O15_PRE_OR_ECLAMPSIA	outcome	|| id:ebi-a-GCST90001732	MR Egger	14	-0.0145374	0.0583712	0.807533	-0.128945	0.0998702	0.985568	0.879022	1.10503
ebi-a-GCST90001732	gen_samplesize_1finngen_R9_O15_PRE_OR_ECLAMPSIA	outcome	|| id:ebi-a-GCST90001732	Weighted median	14	-0.0472866	0.0439168	0.281601	-0.133364	0.0387904	0.953814	0.875147	1.03955
ebi-a-GCST90001732	gen_samplesize_1finngen_R9_O15_PRE_OR_ECLAMPSIA	outcome	|| id:ebi-a-GCST90001732	Weighted mode	14	-0.0341748	0.0393333	0.400685	-0.111268	0.0429184	0.966403	0.894699	1.04385
ebi-a-GCST90001733	gen_samplesize_1finngen_R9_O15_PRE_OR_ECLAMPSIA	outcome	|| id:ebi-a-GCST90001733	Inverse variance weighted (multiplicative random effects)	12	-0.0152692	0.057139	0.789292	-0.127262	0.0967232	0.984847	0.880503	1.10156
ebi-a-GCST90001733	gen_samplesize_1finngen_R9_O15_PRE_OR_ECLAMPSIA	outcome	|| id:ebi-a-GCST90001733	MR Egger	12	0.0975334	0.118002	0.42778	-0.133751	0.328818	1.10245	0.874808	1.38933
ebi-a-GCST90001733	gen_samplesize_1finngen_R9_O15_PRE_OR_ECLAMPSIA	outcome	|| id:ebi-a-GCST90001733	Weighted median	12	-0.0046758	0.0533036	0.930099	-0.109151	0.0997993	0.995335	0.896595	1.10495
ebi-a-GCST90001733	gen_samplesize_1finngen_R9_O15_PRE_OR_ECLAMPSIA	outcome	|| id:ebi-a-GCST90001733	Weighted mode	12	0.00373298	0.0642805	0.954732	-0.122257	0.129723	1.00374	0.884921	1.13851
ebi-a-GCST90001734	gen_samplesize_1finngen_R9_O15_PRE_OR_ECLAMPSIA	outcome	|| id:ebi-a-GCST90001734	Inverse variance weighted (multiplicative random effects)	9	0.0585672	0.0825567	0.478065	-0.103244	0.220378	1.06032	0.901907	1.24655
ebi-a-GCST90001734	gen_samplesize_1finngen_R9_O15_PRE_OR_ECLAMPSIA	outcome	|| id:ebi-a-GCST90001734	MR Egger	9	-0.038235	0.229962	0.872648	-0.488961	0.412491	0.962487	0.613263	1.51058
ebi-a-GCST90001734	gen_samplesize_1finngen_R9_O15_PRE_OR_ECLAMPSIA	outcome	|| id:ebi-a-GCST90001734	Weighted median	9	0.158176	0.0815686	0.0524804	-0.00169893	0.31805	1.17137	0.998303	1.37444
ebi-a-GCST90001734	gen_samplesize_1finngen_R9_O15_PRE_OR_ECLAMPSIA	outcome	|| id:ebi-a-GCST90001734	Weighted mode	9	0.174133	0.10685	0.141813	-0.0352925	0.383558	1.19021	0.965323	1.4675
ebi-a-GCST90001735	gen_samplesize_1finngen_R9_O15_PRE_OR_ECLAMPSIA	outcome	|| id:ebi-a-GCST90001735	Inverse variance weighted (multiplicative random effects)	16	-0.013838	0.0337841	0.682099	-0.0800548	0.0523789	0.986257	0.923066	1.05377
ebi-a-GCST90001735	gen_samplesize_1finngen_R9_O15_PRE_OR_ECLAMPSIA	outcome	|| id:ebi-a-GCST90001735	MR Egger	16	-0.0355794	0.050111	0.489356	-0.133797	0.0626382	0.965046	0.874768	1.06464
ebi-a-GCST90001735	gen_samplesize_1finngen_R9_O15_PRE_OR_ECLAMPSIA	outcome	|| id:ebi-a-GCST90001735	Weighted median	16	-0.0406748	0.0318025	0.200904	-0.103008	0.0216581	0.960141	0.90212	1.02189
ebi-a-GCST90001735	gen_samplesize_1finngen_R9_O15_PRE_OR_ECLAMPSIA	outcome	|| id:ebi-a-GCST90001735	Weighted mode	16	-0.0423308	0.0277782	0.14834	-0.0967761	0.0121144	0.958553	0.907759	1.01219
ebi-a-GCST90001736	gen_samplesize_1finngen_R9_O15_PRE_OR_ECLAMPSIA	outcome	|| id:ebi-a-GCST90001736	Inverse variance weighted	13	-0.0187216	0.0346874	0.589388	-0.0867088	0.0492657	0.981453	0.916944	1.0505
ebi-a-GCST90001736	gen_samplesize_1finngen_R9_O15_PRE_OR_ECLAMPSIA	outcome	|| id:ebi-a-GCST90001736	MR Egger	13	-0.0454366	0.0551497	0.427512	-0.15353	0.0626569	0.95558	0.857675	1.06466
ebi-a-GCST90001736	gen_samplesize_1finngen_R9_O15_PRE_OR_ECLAMPSIA	outcome	|| id:ebi-a-GCST90001736	Weighted median	13	-0.0286504	0.0391213	0.463957	-0.105328	0.0480275	0.971756	0.900029	1.0492
ebi-a-GCST90001736	gen_samplesize_1finngen_R9_O15_PRE_OR_ECLAMPSIA	outcome	|| id:ebi-a-GCST90001736	Weighted mode	13	-0.0339351	0.0395017	0.40713	-0.111358	0.0434882	0.966634	0.894618	1.04445
ebi-a-GCST90001737	gen_samplesize_1finngen_R9_O15_PRE_OR_ECLAMPSIA	outcome	|| id:ebi-a-GCST90001737	Inverse variance weighted	19	0.00191437	0.0120943	0.874231	-0.0217904	0.0256192	1.00192	0.978445	1.02595
ebi-a-GCST90001737	gen_samplesize_1finngen_R9_O15_PRE_OR_ECLAMPSIA	outcome	|| id:ebi-a-GCST90001737	MR Egger	19	-0.00789834	0.0143603	0.589466	-0.0360446	0.0202479	0.992133	0.964597	1.02045
ebi-a-GCST90001737	gen_samplesize_1finngen_R9_O15_PRE_OR_ECLAMPSIA	outcome	|| id:ebi-a-GCST90001737	Weighted median	19	-0.00108008	0.0165424	0.947942	-0.0335033	0.0313431	0.99892	0.967052	1.03184
ebi-a-GCST90001737	gen_samplesize_1finngen_R9_O15_PRE_OR_ECLAMPSIA	outcome	|| id:ebi-a-GCST90001737	Weighted mode	19	-0.00188263	0.0121418	0.878504	-0.0256805	0.0219152	0.998119	0.974646	1.02216
ebi-a-GCST90001738	gen_samplesize_1finngen_R9_O15_PRE_OR_ECLAMPSIA	outcome	|| id:ebi-a-GCST90001738	Inverse variance weighted	12	0.0116182	0.02184	0.594748	-0.0311882	0.0544246	1.01169	0.969293	1.05593
ebi-a-GCST90001738	gen_samplesize_1finngen_R9_O15_PRE_OR_ECLAMPSIA	outcome	|| id:ebi-a-GCST90001738	MR Egger	12	0.0417456	0.0227285	0.0961154	-0.00280227	0.0862936	1.04263	0.997202	1.09013
ebi-a-GCST90001738	gen_samplesize_1finngen_R9_O15_PRE_OR_ECLAMPSIA	outcome	|| id:ebi-a-GCST90001738	Weighted median	12	0.0400111	0.0274071	0.144323	-0.0137068	0.0937291	1.04082	0.986387	1.09826
ebi-a-GCST90001738	gen_samplesize_1finngen_R9_O15_PRE_OR_ECLAMPSIA	outcome	|| id:ebi-a-GCST90001738	Weighted mode	12	0.0243819	0.0232385	0.316591	-0.0211657	0.0699294	1.02468	0.979057	1.07243
ebi-a-GCST90001739	gen_samplesize_1finngen_R9_O15_PRE_OR_ECLAMPSIA	outcome	|| id:ebi-a-GCST90001739	Inverse variance weighted	13	0.0861134	0.0403259	0.0327254	0.00707462	0.165152	1.08993	1.0071	1.17957
ebi-a-GCST90001739	gen_samplesize_1finngen_R9_O15_PRE_OR_ECLAMPSIA	outcome	|| id:ebi-a-GCST90001739	MR Egger	13	0.0253142	0.0688957	0.720271	-0.109721	0.16035	1.02564	0.896084	1.17392
ebi-a-GCST90001739	gen_samplesize_1finngen_R9_O15_PRE_OR_ECLAMPSIA	outcome	|| id:ebi-a-GCST90001739	Weighted median	13	0.0445918	0.056961	0.433717	-0.0670519	0.156235	1.0456	0.935147	1.1691
ebi-a-GCST90001739	gen_samplesize_1finngen_R9_O15_PRE_OR_ECLAMPSIA	outcome	|| id:ebi-a-GCST90001739	Weighted mode	13	0.0430315	0.0595459	0.483735	-0.0736785	0.159742	1.04397	0.92897	1.17321
ebi-a-GCST90001740	gen_samplesize_1finngen_R9_O15_PRE_OR_ECLAMPSIA	outcome	|| id:ebi-a-GCST90001740	Inverse variance weighted (multiplicative random effects)	16	0.00418731	0.0453876	0.926494	-0.0847724	0.093147	1.0042	0.918721	1.09762
ebi-a-GCST90001740	gen_samplesize_1finngen_R9_O15_PRE_OR_ECLAMPSIA	outcome	|| id:ebi-a-GCST90001740	MR Egger	16	-0.0478779	0.0990577	0.636331	-0.242031	0.146275	0.95325	0.785032	1.15751
ebi-a-GCST90001740	gen_samplesize_1finngen_R9_O15_PRE_OR_ECLAMPSIA	outcome	|| id:ebi-a-GCST90001740	Weighted median	16	0.025369	0.0484969	0.600901	-0.0696849	0.120423	1.02569	0.932688	1.12797
ebi-a-GCST90001740	gen_samplesize_1finngen_R9_O15_PRE_OR_ECLAMPSIA	outcome	|| id:ebi-a-GCST90001740	Weighted mode	16	-0.014195	0.0613551	0.820163	-0.134451	0.106061	0.985905	0.874196	1.11189
ebi-a-GCST90001741	gen_samplesize_1finngen_R9_O15_PRE_OR_ECLAMPSIA	outcome	|| id:ebi-a-GCST90001741	Inverse variance weighted	16	0.00435885	0.0112632	0.698758	-0.0177171	0.0264348	1.00437	0.982439	1.02679
ebi-a-GCST90001741	gen_samplesize_1finngen_R9_O15_PRE_OR_ECLAMPSIA	outcome	|| id:ebi-a-GCST90001741	MR Egger	16	-0.00423587	0.0134048	0.756667	-0.0305092	0.0220375	0.995773	0.969951	1.02228
ebi-a-GCST90001741	gen_samplesize_1finngen_R9_O15_PRE_OR_ECLAMPSIA	outcome	|| id:ebi-a-GCST90001741	Weighted median	16	0.00222397	0.0145127	0.878206	-0.0262209	0.0306688	1.00223	0.97412	1.03114
ebi-a-GCST90001741	gen_samplesize_1finngen_R9_O15_PRE_OR_ECLAMPSIA	outcome	|| id:ebi-a-GCST90001741	Weighted mode	16	-3.94951e-05	0.0117964	0.997373	-0.0231604	0.0230814	0.999961	0.977106	1.02335
ebi-a-GCST90001742	gen_samplesize_1finngen_R9_O15_PRE_OR_ECLAMPSIA	outcome	|| id:ebi-a-GCST90001742	Inverse variance weighted	18	-0.0121158	0.0228525	0.595991	-0.0569066	0.032675	0.987957	0.944682	1.03321
ebi-a-GCST90001742	gen_samplesize_1finngen_R9_O15_PRE_OR_ECLAMPSIA	outcome	|| id:ebi-a-GCST90001742	MR Egger	18	-0.035253	0.0332663	0.305007	-0.100455	0.0299489	0.965361	0.904426	1.0304
ebi-a-GCST90001742	gen_samplesize_1finngen_R9_O15_PRE_OR_ECLAMPSIA	outcome	|| id:ebi-a-GCST90001742	Weighted median	18	-0.0100865	0.0309207	0.744269	-0.0706911	0.0505181	0.989964	0.93175	1.05182
ebi-a-GCST90001742	gen_samplesize_1finngen_R9_O15_PRE_OR_ECLAMPSIA	outcome	|| id:ebi-a-GCST90001742	Weighted mode	18	-0.0237606	0.0289641	0.423374	-0.0805303	0.0330091	0.976519	0.922627	1.03356
ebi-a-GCST90001743	gen_samplesize_1finngen_R9_O15_PRE_OR_ECLAMPSIA	outcome	|| id:ebi-a-GCST90001743	Inverse variance weighted	14	0.0219522	0.0348024	0.528194	-0.0462606	0.0901649	1.02219	0.954793	1.09435
ebi-a-GCST90001743	gen_samplesize_1finngen_R9_O15_PRE_OR_ECLAMPSIA	outcome	|| id:ebi-a-GCST90001743	MR Egger	14	-0.0725288	0.0930658	0.450883	-0.254938	0.10988	0.930039	0.774965	1.11614
ebi-a-GCST90001743	gen_samplesize_1finngen_R9_O15_PRE_OR_ECLAMPSIA	outcome	|| id:ebi-a-GCST90001743	Weighted median	14	-0.00375067	0.0400518	0.925391	-0.0822523	0.0747509	0.996256	0.92104	1.07762
ebi-a-GCST90001743	gen_samplesize_1finngen_R9_O15_PRE_OR_ECLAMPSIA	outcome	|| id:ebi-a-GCST90001743	Weighted mode	14	-0.00995741	0.0508739	0.84785	-0.10967	0.0897555	0.990092	0.89613	1.09391
ebi-a-GCST90001744	gen_samplesize_1finngen_R9_O15_PRE_OR_ECLAMPSIA	outcome	|| id:ebi-a-GCST90001744	Inverse variance weighted	7	-0.0413031	0.0310376	0.183273	-0.102137	0.0195306	0.959538	0.902906	1.01972
ebi-a-GCST90001744	gen_samplesize_1finngen_R9_O15_PRE_OR_ECLAMPSIA	outcome	|| id:ebi-a-GCST90001744	MR Egger	7	-0.0244867	0.0448294	0.608393	-0.112352	0.0633789	0.975811	0.893729	1.06543
ebi-a-GCST90001744	gen_samplesize_1finngen_R9_O15_PRE_OR_ECLAMPSIA	outcome	|| id:ebi-a-GCST90001744	Weighted median	7	-0.0358565	0.036257	0.322686	-0.10692	0.0352073	0.964779	0.898597	1.03583
ebi-a-GCST90001744	gen_samplesize_1finngen_R9_O15_PRE_OR_ECLAMPSIA	outcome	|| id:ebi-a-GCST90001744	Weighted mode	7	-0.0364497	0.0346335	0.333124	-0.104331	0.031432	0.964207	0.900927	1.03193
ebi-a-GCST90001745	gen_samplesize_1finngen_R9_O15_PRE_OR_ECLAMPSIA	outcome	|| id:ebi-a-GCST90001745	Inverse variance weighted	17	-0.032225	0.0262034	0.21877	-0.0835836	0.0191335	0.968289	0.919814	1.01932
ebi-a-GCST90001745	gen_samplesize_1finngen_R9_O15_PRE_OR_ECLAMPSIA	outcome	|| id:ebi-a-GCST90001745	MR Egger	17	-0.0893226	0.0454176	0.068001	-0.178341	-0.000304146	0.914551	0.836657	0.999696
ebi-a-GCST90001745	gen_samplesize_1finngen_R9_O15_PRE_OR_ECLAMPSIA	outcome	|| id:ebi-a-GCST90001745	Weighted median	17	-0.0571709	0.0361886	0.114152	-0.128101	0.0137588	0.944433	0.879765	1.01385
ebi-a-GCST90001745	gen_samplesize_1finngen_R9_O15_PRE_OR_ECLAMPSIA	outcome	|| id:ebi-a-GCST90001745	Weighted mode	17	-0.0533254	0.0328378	0.123931	-0.117688	0.0110368	0.948071	0.888974	1.0111
ebi-a-GCST90001746	gen_samplesize_1finngen_R9_O15_PRE_OR_ECLAMPSIA	outcome	|| id:ebi-a-GCST90001746	Inverse variance weighted	13	-0.0392006	0.0374526	0.295251	-0.112608	0.0342066	0.961558	0.893501	1.0348
ebi-a-GCST90001746	gen_samplesize_1finngen_R9_O15_PRE_OR_ECLAMPSIA	outcome	|| id:ebi-a-GCST90001746	MR Egger	13	-0.0810524	0.06572	0.243169	-0.209864	0.0477588	0.922145	0.810695	1.04892
ebi-a-GCST90001746	gen_samplesize_1finngen_R9_O15_PRE_OR_ECLAMPSIA	outcome	|| id:ebi-a-GCST90001746	Weighted median	13	-0.0527308	0.0449023	0.240257	-0.140739	0.0352778	0.948635	0.868716	1.03591
ebi-a-GCST90001746	gen_samplesize_1finngen_R9_O15_PRE_OR_ECLAMPSIA	outcome	|| id:ebi-a-GCST90001746	Weighted mode	13	-0.0439165	0.0428444	0.325572	-0.127892	0.0400585	0.957034	0.879949	1.04087
ebi-a-GCST90001747	gen_samplesize_1finngen_R9_O15_PRE_OR_ECLAMPSIA	outcome	|| id:ebi-a-GCST90001747	Inverse variance weighted	18	0.0062689	0.0127883	0.623989	-0.0187962	0.031334	1.00629	0.981379	1.03183
ebi-a-GCST90001747	gen_samplesize_1finngen_R9_O15_PRE_OR_ECLAMPSIA	outcome	|| id:ebi-a-GCST90001747	MR Egger	18	0.0013528	0.0153587	0.930906	-0.0287502	0.0314558	1.00135	0.971659	1.03196
ebi-a-GCST90001747	gen_samplesize_1finngen_R9_O15_PRE_OR_ECLAMPSIA	outcome	|| id:ebi-a-GCST90001747	Weighted median	18	-0.00230302	0.0147696	0.876088	-0.0312514	0.0266453	0.9977	0.969232	1.027
ebi-a-GCST90001747	gen_samplesize_1finngen_R9_O15_PRE_OR_ECLAMPSIA	outcome	|| id:ebi-a-GCST90001747	Weighted mode	18	0.00211328	0.0132482	0.875143	-0.0238531	0.0280797	1.00212	0.976429	1.02848
ebi-a-GCST90001748	gen_samplesize_1finngen_R9_O15_PRE_OR_ECLAMPSIA	outcome	|| id:ebi-a-GCST90001748	Inverse variance weighted	14	0.0212386	0.03541	0.548644	-0.0481649	0.0906422	1.02147	0.952977	1.09488
ebi-a-GCST90001748	gen_samplesize_1finngen_R9_O15_PRE_OR_ECLAMPSIA	outcome	|| id:ebi-a-GCST90001748	MR Egger	14	-0.0602449	0.120308	0.6256	-0.296048	0.175558	0.941534	0.743752	1.19191
ebi-a-GCST90001748	gen_samplesize_1finngen_R9_O15_PRE_OR_ECLAMPSIA	outcome	|| id:ebi-a-GCST90001748	Weighted median	14	0.0294361	0.0458423	0.520797	-0.0604147	0.119287	1.02987	0.941374	1.12669
ebi-a-GCST90001748	gen_samplesize_1finngen_R9_O15_PRE_OR_ECLAMPSIA	outcome	|| id:ebi-a-GCST90001748	Weighted mode	14	-0.040388	0.0660327	0.551325	-0.169812	0.0890361	0.960417	0.843823	1.09312
ebi-a-GCST90001749	gen_samplesize_1finngen_R9_O15_PRE_OR_ECLAMPSIA	outcome	|| id:ebi-a-GCST90001749	Inverse variance weighted	11	0.00966813	0.0268656	0.718944	-0.0429884	0.0623247	1.00972	0.957922	1.06431
ebi-a-GCST90001749	gen_samplesize_1finngen_R9_O15_PRE_OR_ECLAMPSIA	outcome	|| id:ebi-a-GCST90001749	MR Egger	11	0.0287866	0.0484448	0.567003	-0.0661652	0.123738	1.0292	0.935976	1.13172
ebi-a-GCST90001749	gen_samplesize_1finngen_R9_O15_PRE_OR_ECLAMPSIA	outcome	|| id:ebi-a-GCST90001749	Weighted median	11	0.0107482	0.0335376	0.748602	-0.0549854	0.0764819	1.01081	0.946499	1.07948
ebi-a-GCST90001749	gen_samplesize_1finngen_R9_O15_PRE_OR_ECLAMPSIA	outcome	|| id:ebi-a-GCST90001749	Weighted mode	11	0.00925479	0.0381822	0.813381	-0.0655823	0.0840919	1.0093	0.936522	1.08773
ebi-a-GCST90001750	gen_samplesize_1finngen_R9_O15_PRE_OR_ECLAMPSIA	outcome	|| id:ebi-a-GCST90001750	Inverse variance weighted	15	-0.0229499	0.0300142	0.444489	-0.0817777	0.0358779	0.977311	0.921477	1.03653
ebi-a-GCST90001750	gen_samplesize_1finngen_R9_O15_PRE_OR_ECLAMPSIA	outcome	|| id:ebi-a-GCST90001750	MR Egger	15	-0.0670918	0.0882898	0.460871	-0.24014	0.105956	0.935109	0.786518	1.11177
ebi-a-GCST90001750	gen_samplesize_1finngen_R9_O15_PRE_OR_ECLAMPSIA	outcome	|| id:ebi-a-GCST90001750	Weighted median	15	-0.0153014	0.0408763	0.708155	-0.0954189	0.0648161	0.984815	0.908992	1.06696
ebi-a-GCST90001750	gen_samplesize_1finngen_R9_O15_PRE_OR_ECLAMPSIA	outcome	|| id:ebi-a-GCST90001750	Weighted mode	15	-0.0115994	0.049452	0.817946	-0.108525	0.0853266	0.988468	0.897156	1.08907
ebi-a-GCST90001751	gen_samplesize_1finngen_R9_O15_PRE_OR_ECLAMPSIA	outcome	|| id:ebi-a-GCST90001751	Inverse variance weighted	18	-0.0263077	0.0387051	0.496697	-0.10217	0.0495543	0.974035	0.902876	1.0508
ebi-a-GCST90001751	gen_samplesize_1finngen_R9_O15_PRE_OR_ECLAMPSIA	outcome	|| id:ebi-a-GCST90001751	MR Egger	18	-0.00909051	0.132663	0.946218	-0.26911	0.250929	0.990951	0.764059	1.28522
ebi-a-GCST90001751	gen_samplesize_1finngen_R9_O15_PRE_OR_ECLAMPSIA	outcome	|| id:ebi-a-GCST90001751	Weighted median	18	-0.0159588	0.0452481	0.724317	-0.104645	0.0727275	0.984168	0.900644	1.07544
ebi-a-GCST90001751	gen_samplesize_1finngen_R9_O15_PRE_OR_ECLAMPSIA	outcome	|| id:ebi-a-GCST90001751	Weighted mode	18	0.0084794	0.057334	0.884166	-0.103895	0.120854	1.00852	0.90132	1.12846
ebi-a-GCST90001752	gen_samplesize_1finngen_R9_O15_PRE_OR_ECLAMPSIA	outcome	|| id:ebi-a-GCST90001752	Inverse variance weighted	21	0.0276154	0.0248286	0.266034	-0.0210487	0.0762796	1.028	0.979171	1.07926
ebi-a-GCST90001752	gen_samplesize_1finngen_R9_O15_PRE_OR_ECLAMPSIA	outcome	|| id:ebi-a-GCST90001752	MR Egger	21	0.026241	0.0369794	0.486564	-0.0462386	0.0987205	1.02659	0.954814	1.10376
ebi-a-GCST90001752	gen_samplesize_1finngen_R9_O15_PRE_OR_ECLAMPSIA	outcome	|| id:ebi-a-GCST90001752	Weighted median	21	0.0450324	0.0332035	0.175018	-0.0200465	0.110111	1.04606	0.980153	1.1164
ebi-a-GCST90001752	gen_samplesize_1finngen_R9_O15_PRE_OR_ECLAMPSIA	outcome	|| id:ebi-a-GCST90001752	Weighted mode	21	0.0386816	0.0292534	0.200993	-0.018655	0.0960182	1.03944	0.981518	1.10078
ebi-a-GCST90001753	gen_samplesize_1finngen_R9_O15_PRE_OR_ECLAMPSIA	outcome	|| id:ebi-a-GCST90001753	Inverse variance weighted	14	0.0206559	0.0366519	0.573046	-0.0511817	0.0924936	1.02087	0.950106	1.09691
ebi-a-GCST90001753	gen_samplesize_1finngen_R9_O15_PRE_OR_ECLAMPSIA	outcome	|| id:ebi-a-GCST90001753	MR Egger	14	-0.0585043	0.0769703	0.461874	-0.209366	0.0923574	0.943174	0.811098	1.09676
ebi-a-GCST90001753	gen_samplesize_1finngen_R9_O15_PRE_OR_ECLAMPSIA	outcome	|| id:ebi-a-GCST90001753	Weighted median	14	0.00761459	0.0524338	0.884535	-0.0951557	0.110385	1.00764	0.909231	1.11671
ebi-a-GCST90001753	gen_samplesize_1finngen_R9_O15_PRE_OR_ECLAMPSIA	outcome	|| id:ebi-a-GCST90001753	Weighted mode	14	-0.00331602	0.0605987	0.957193	-0.122089	0.115457	0.996689	0.885069	1.12239
ebi-a-GCST90001754	gen_samplesize_1finngen_R9_O15_PRE_OR_ECLAMPSIA	outcome	|| id:ebi-a-GCST90001754	Inverse variance weighted	13	-0.0456069	0.0371822	0.219981	-0.118484	0.0272702	0.955417	0.888266	1.02765
ebi-a-GCST90001754	gen_samplesize_1finngen_R9_O15_PRE_OR_ECLAMPSIA	outcome	|| id:ebi-a-GCST90001754	MR Egger	13	0.061896	0.0781394	0.445036	-0.0912573	0.215049	1.06385	0.912783	1.23992
ebi-a-GCST90001754	gen_samplesize_1finngen_R9_O15_PRE_OR_ECLAMPSIA	outcome	|| id:ebi-a-GCST90001754	Weighted median	13	-0.0380384	0.0470271	0.418595	-0.130212	0.0541348	0.962676	0.87791	1.05563
ebi-a-GCST90001754	gen_samplesize_1finngen_R9_O15_PRE_OR_ECLAMPSIA	outcome	|| id:ebi-a-GCST90001754	Weighted mode	13	-0.0246887	0.0570683	0.672967	-0.136542	0.0871651	0.975614	0.872369	1.09108
ebi-a-GCST90001755	gen_samplesize_1finngen_R9_O15_PRE_OR_ECLAMPSIA	outcome	|| id:ebi-a-GCST90001755	Inverse variance weighted	17	0.0601543	0.035048	0.0861	-0.00853983	0.128848	1.062	0.991497	1.13752
ebi-a-GCST90001755	gen_samplesize_1finngen_R9_O15_PRE_OR_ECLAMPSIA	outcome	|| id:ebi-a-GCST90001755	MR Egger	17	0.0976037	0.0708321	0.188426	-0.0412273	0.236435	1.10253	0.959611	1.26672
ebi-a-GCST90001755	gen_samplesize_1finngen_R9_O15_PRE_OR_ECLAMPSIA	outcome	|| id:ebi-a-GCST90001755	Weighted median	17	0.0673929	0.0434984	0.121305	-0.0178639	0.15265	1.06972	0.982295	1.16492
ebi-a-GCST90001755	gen_samplesize_1finngen_R9_O15_PRE_OR_ECLAMPSIA	outcome	|| id:ebi-a-GCST90001755	Weighted mode	17	0.0771996	0.0541092	0.172879	-0.0288544	0.183254	1.08026	0.971558	1.20112
ebi-a-GCST90001756	gen_samplesize_1finngen_R9_O15_PRE_OR_ECLAMPSIA	outcome	|| id:ebi-a-GCST90001756	Inverse variance weighted	5	0.116531	0.0549863	0.0340681	0.00875737	0.224304	1.12359	1.0088	1.25145
ebi-a-GCST90001756	gen_samplesize_1finngen_R9_O15_PRE_OR_ECLAMPSIA	outcome	|| id:ebi-a-GCST90001756	MR Egger	5	0.214088	0.143035	0.231364	-0.0662604	0.494437	1.23873	0.935887	1.63958
ebi-a-GCST90001756	gen_samplesize_1finngen_R9_O15_PRE_OR_ECLAMPSIA	outcome	|| id:ebi-a-GCST90001756	Weighted median	5	0.0482452	0.07339	0.510936	-0.0955991	0.19209	1.04943	0.908828	1.21178
ebi-a-GCST90001756	gen_samplesize_1finngen_R9_O15_PRE_OR_ECLAMPSIA	outcome	|| id:ebi-a-GCST90001756	Weighted mode	5	0.0331247	0.106665	0.771652	-0.175938	0.242187	1.03368	0.83867	1.27403
ebi-a-GCST90001757	gen_samplesize_1finngen_R9_O15_PRE_OR_ECLAMPSIA	outcome	|| id:ebi-a-GCST90001757	Inverse variance weighted	23	0.000932591	0.00810866	0.908436	-0.0149604	0.0168256	1.00093	0.985151	1.01697
ebi-a-GCST90001757	gen_samplesize_1finngen_R9_O15_PRE_OR_ECLAMPSIA	outcome	|| id:ebi-a-GCST90001757	MR Egger	23	0.00877263	0.0083392	0.304766	-0.0075722	0.0251175	1.00881	0.992456	1.02544
ebi-a-GCST90001757	gen_samplesize_1finngen_R9_O15_PRE_OR_ECLAMPSIA	outcome	|| id:ebi-a-GCST90001757	Weighted median	23	0.00684419	0.00908354	0.451166	-0.0109595	0.0246479	1.00687	0.9891	1.02495
ebi-a-GCST90001757	gen_samplesize_1finngen_R9_O15_PRE_OR_ECLAMPSIA	outcome	|| id:ebi-a-GCST90001757	Weighted mode	23	0.00347923	0.00800693	0.668138	-0.0122144	0.0191728	1.00349	0.98786	1.01936
ebi-a-GCST90001758	gen_samplesize_1finngen_R9_O15_PRE_OR_ECLAMPSIA	outcome	|| id:ebi-a-GCST90001758	Inverse variance weighted	22	0.0202181	0.019433	0.298153	-0.0178705	0.0583068	1.02042	0.982288	1.06004
ebi-a-GCST90001758	gen_samplesize_1finngen_R9_O15_PRE_OR_ECLAMPSIA	outcome	|| id:ebi-a-GCST90001758	MR Egger	22	0.0359562	0.025455	0.173164	-0.0139356	0.085848	1.03661	0.986161	1.08964
ebi-a-GCST90001758	gen_samplesize_1finngen_R9_O15_PRE_OR_ECLAMPSIA	outcome	|| id:ebi-a-GCST90001758	Weighted median	22	0.0347076	0.0270485	0.199436	-0.0183076	0.0877227	1.03532	0.981859	1.09169
ebi-a-GCST90001758	gen_samplesize_1finngen_R9_O15_PRE_OR_ECLAMPSIA	outcome	|| id:ebi-a-GCST90001758	Weighted mode	22	0.0298565	0.0238315	0.224044	-0.0168533	0.0765663	1.03031	0.983288	1.07957
ebi-a-GCST90001759	gen_samplesize_1finngen_R9_O15_PRE_OR_ECLAMPSIA	outcome	|| id:ebi-a-GCST90001759	Inverse variance weighted	16	0.00101744	0.0129205	0.937235	-0.0243068	0.0263417	1.00102	0.975986	1.02669
ebi-a-GCST90001759	gen_samplesize_1finngen_R9_O15_PRE_OR_ECLAMPSIA	outcome	|| id:ebi-a-GCST90001759	MR Egger	16	-0.00483257	0.0154744	0.75942	-0.0351624	0.0254973	0.995179	0.965449	1.02583
ebi-a-GCST90001759	gen_samplesize_1finngen_R9_O15_PRE_OR_ECLAMPSIA	outcome	|| id:ebi-a-GCST90001759	Weighted median	16	-0.00147775	0.0144232	0.918394	-0.0297472	0.0267917	0.998523	0.970691	1.02715
ebi-a-GCST90001759	gen_samplesize_1finngen_R9_O15_PRE_OR_ECLAMPSIA	outcome	|| id:ebi-a-GCST90001759	Weighted mode	16	-0.000652944	0.0128877	0.960262	-0.0259127	0.0246069	0.999347	0.97442	1.02491
ebi-a-GCST90001760	gen_samplesize_1finngen_R9_O15_PRE_OR_ECLAMPSIA	outcome	|| id:ebi-a-GCST90001760	Inverse variance weighted	16	-0.0258521	0.032586	0.427575	-0.0897208	0.0380166	0.974479	0.914186	1.03875
ebi-a-GCST90001760	gen_samplesize_1finngen_R9_O15_PRE_OR_ECLAMPSIA	outcome	|| id:ebi-a-GCST90001760	MR Egger	16	-0.125724	0.067625	0.0841537	-0.258269	0.00682121	0.881858	0.772388	1.00684
ebi-a-GCST90001760	gen_samplesize_1finngen_R9_O15_PRE_OR_ECLAMPSIA	outcome	|| id:ebi-a-GCST90001760	Weighted median	16	-0.0432455	0.0454773	0.341643	-0.132381	0.0458901	0.957676	0.876007	1.04696
ebi-a-GCST90001760	gen_samplesize_1finngen_R9_O15_PRE_OR_ECLAMPSIA	outcome	|| id:ebi-a-GCST90001760	Weighted mode	16	-0.0400449	0.0490436	0.426983	-0.13617	0.0560805	0.960746	0.872694	1.05768
ebi-a-GCST90001761	gen_samplesize_1finngen_R9_O15_PRE_OR_ECLAMPSIA	outcome	|| id:ebi-a-GCST90001761	Inverse variance weighted (multiplicative random effects)	18	-0.00626575	0.0376784	0.867924	-0.0801154	0.0675839	0.993754	0.92301	1.06992
ebi-a-GCST90001761	gen_samplesize_1finngen_R9_O15_PRE_OR_ECLAMPSIA	outcome	|| id:ebi-a-GCST90001761	MR Egger	18	-0.00385517	0.0914656	0.966902	-0.183128	0.175417	0.996152	0.832662	1.19174
ebi-a-GCST90001761	gen_samplesize_1finngen_R9_O15_PRE_OR_ECLAMPSIA	outcome	|| id:ebi-a-GCST90001761	Weighted median	18	-0.0224573	0.0395538	0.570194	-0.0999828	0.0550681	0.977793	0.904853	1.05661
ebi-a-GCST90001761	gen_samplesize_1finngen_R9_O15_PRE_OR_ECLAMPSIA	outcome	|| id:ebi-a-GCST90001761	Weighted mode	18	-0.0136908	0.0429559	0.753824	-0.0978843	0.0705028	0.986403	0.906754	1.07305
ebi-a-GCST90001762	gen_samplesize_1finngen_R9_O15_PRE_OR_ECLAMPSIA	outcome	|| id:ebi-a-GCST90001762	Inverse variance weighted	15	-0.00602476	0.0135208	0.655891	-0.0325254	0.0204759	0.993993	0.967998	1.02069
ebi-a-GCST90001762	gen_samplesize_1finngen_R9_O15_PRE_OR_ECLAMPSIA	outcome	|| id:ebi-a-GCST90001762	MR Egger	15	-0.00658197	0.0167938	0.70146	-0.0394978	0.0263339	0.99344	0.961272	1.02668
ebi-a-GCST90001762	gen_samplesize_1finngen_R9_O15_PRE_OR_ECLAMPSIA	outcome	|| id:ebi-a-GCST90001762	Weighted median	15	-0.00332042	0.0149282	0.823983	-0.0325798	0.0259389	0.996685	0.967945	1.02628
ebi-a-GCST90001762	gen_samplesize_1finngen_R9_O15_PRE_OR_ECLAMPSIA	outcome	|| id:ebi-a-GCST90001762	Weighted mode	15	-0.00292676	0.013383	0.830045	-0.0291574	0.0233038	0.997078	0.971264	1.02358
ebi-a-GCST90001763	gen_samplesize_1finngen_R9_O15_PRE_OR_ECLAMPSIA	outcome	|| id:ebi-a-GCST90001763	Inverse variance weighted	10	0.0395019	0.0381136	0.300004	-0.0352009	0.114205	1.04029	0.965411	1.12098
ebi-a-GCST90001763	gen_samplesize_1finngen_R9_O15_PRE_OR_ECLAMPSIA	outcome	|| id:ebi-a-GCST90001763	MR Egger	10	0.0769005	0.136779	0.589365	-0.191186	0.344987	1.07993	0.825979	1.41197
ebi-a-GCST90001763	gen_samplesize_1finngen_R9_O15_PRE_OR_ECLAMPSIA	outcome	|| id:ebi-a-GCST90001763	Weighted median	10	0.0216989	0.0486516	0.655593	-0.0736582	0.117056	1.02194	0.928989	1.12418
ebi-a-GCST90001763	gen_samplesize_1finngen_R9_O15_PRE_OR_ECLAMPSIA	outcome	|| id:ebi-a-GCST90001763	Weighted mode	10	0.000882648	0.0682358	0.989962	-0.13286	0.134625	1.00088	0.875588	1.14411
ebi-a-GCST90001765	gen_samplesize_1finngen_R9_O15_PRE_OR_ECLAMPSIA	outcome	|| id:ebi-a-GCST90001765	Inverse variance weighted	14	-0.00683598	0.0140593	0.626808	-0.0343923	0.0207203	0.993187	0.966192	1.02094
ebi-a-GCST90001765	gen_samplesize_1finngen_R9_O15_PRE_OR_ECLAMPSIA	outcome	|| id:ebi-a-GCST90001765	MR Egger	14	-0.0035287	0.016814	0.837292	-0.0364842	0.0294268	0.996478	0.964173	1.02986
ebi-a-GCST90001765	gen_samplesize_1finngen_R9_O15_PRE_OR_ECLAMPSIA	outcome	|| id:ebi-a-GCST90001765	Weighted median	14	-0.00614879	0.0195646	0.753307	-0.0444954	0.0321978	0.99387	0.95648	1.03272
ebi-a-GCST90001765	gen_samplesize_1finngen_R9_O15_PRE_OR_ECLAMPSIA	outcome	|| id:ebi-a-GCST90001765	Weighted mode	14	-0.0029247	0.0170949	0.866791	-0.0364308	0.0305814	0.99708	0.964225	1.03105
ebi-a-GCST90001766	gen_samplesize_1finngen_R9_O15_PRE_OR_ECLAMPSIA	outcome	|| id:ebi-a-GCST90001766	Inverse variance weighted	12	-0.00636623	0.0248212	0.797578	-0.0550158	0.0422834	0.993654	0.94647	1.04319
ebi-a-GCST90001766	gen_samplesize_1finngen_R9_O15_PRE_OR_ECLAMPSIA	outcome	|| id:ebi-a-GCST90001766	MR Egger	12	0.0255505	0.0325459	0.450617	-0.0382395	0.0893404	1.02588	0.962482	1.09345
ebi-a-GCST90001766	gen_samplesize_1finngen_R9_O15_PRE_OR_ECLAMPSIA	outcome	|| id:ebi-a-GCST90001766	Weighted median	12	0.018494	0.0321263	0.564841	-0.0444736	0.0814616	1.01867	0.956501	1.08487
ebi-a-GCST90001766	gen_samplesize_1finngen_R9_O15_PRE_OR_ECLAMPSIA	outcome	|| id:ebi-a-GCST90001766	Weighted mode	12	0.0165587	0.0302943	0.59557	-0.042818	0.0759355	1.0167	0.958086	1.07889
ebi-a-GCST90001767	gen_samplesize_1finngen_R9_O15_PRE_OR_ECLAMPSIA	outcome	|| id:ebi-a-GCST90001767	Inverse variance weighted	9	-0.0526963	0.0250785	0.0356183	-0.10185	-0.00354254	0.948668	0.903165	0.996464
ebi-a-GCST90001767	gen_samplesize_1finngen_R9_O15_PRE_OR_ECLAMPSIA	outcome	|| id:ebi-a-GCST90001767	MR Egger	9	-0.0942709	0.0428092	0.063532	-0.178177	-0.0103649	0.910036	0.836794	0.989689
ebi-a-GCST90001767	gen_samplesize_1finngen_R9_O15_PRE_OR_ECLAMPSIA	outcome	|| id:ebi-a-GCST90001767	Weighted median	9	-0.0516994	0.0302834	0.0877874	-0.111055	0.00765604	0.949614	0.89489	1.00769
ebi-a-GCST90001767	gen_samplesize_1finngen_R9_O15_PRE_OR_ECLAMPSIA	outcome	|| id:ebi-a-GCST90001767	Weighted mode	9	-0.0590486	0.0324837	0.106612	-0.122717	0.00461938	0.942661	0.884514	1.00463
ebi-a-GCST90001768	gen_samplesize_1finngen_R9_O15_PRE_OR_ECLAMPSIA	outcome	|| id:ebi-a-GCST90001768	Inverse variance weighted	17	-0.00728447	0.025936	0.778815	-0.0581189	0.04355	0.992742	0.943538	1.04451
ebi-a-GCST90001768	gen_samplesize_1finngen_R9_O15_PRE_OR_ECLAMPSIA	outcome	|| id:ebi-a-GCST90001768	MR Egger	17	-0.0521769	0.0343508	0.149571	-0.119504	0.0151507	0.949161	0.88736	1.01527
ebi-a-GCST90001768	gen_samplesize_1finngen_R9_O15_PRE_OR_ECLAMPSIA	outcome	|| id:ebi-a-GCST90001768	Weighted median	17	-0.0243588	0.0285783	0.394018	-0.0803723	0.0316546	0.975935	0.922773	1.03216
ebi-a-GCST90001768	gen_samplesize_1finngen_R9_O15_PRE_OR_ECLAMPSIA	outcome	|| id:ebi-a-GCST90001768	Weighted mode	17	-0.0267942	0.0251069	0.301719	-0.0760038	0.0224154	0.973562	0.926813	1.02267
ebi-a-GCST90001769	gen_samplesize_1finngen_R9_O15_PRE_OR_ECLAMPSIA	outcome	|| id:ebi-a-GCST90001769	Inverse variance weighted	17	-4.96788e-06	0.0185368	0.999786	-0.0363371	0.0363271	0.999995	0.964315	1.037
ebi-a-GCST90001769	gen_samplesize_1finngen_R9_O15_PRE_OR_ECLAMPSIA	outcome	|| id:ebi-a-GCST90001769	MR Egger	17	0.00814166	0.0262649	0.760839	-0.0433376	0.0596209	1.00817	0.957588	1.06143
ebi-a-GCST90001769	gen_samplesize_1finngen_R9_O15_PRE_OR_ECLAMPSIA	outcome	|| id:ebi-a-GCST90001769	Weighted median	17	-0.0100786	0.0284103	0.722777	-0.0657627	0.0456056	0.989972	0.936353	1.04666
ebi-a-GCST90001769	gen_samplesize_1finngen_R9_O15_PRE_OR_ECLAMPSIA	outcome	|| id:ebi-a-GCST90001769	Weighted mode	17	-0.000831135	0.0269577	0.975786	-0.0536683	0.052006	0.999169	0.947746	1.05338
ebi-a-GCST90001770	gen_samplesize_1finngen_R9_O15_PRE_OR_ECLAMPSIA	outcome	|| id:ebi-a-GCST90001770	Inverse variance weighted	4	0.063307	0.0571918	0.268327	-0.048789	0.175403	1.06535	0.952382	1.19173
ebi-a-GCST90001770	gen_samplesize_1finngen_R9_O15_PRE_OR_ECLAMPSIA	outcome	|| id:ebi-a-GCST90001770	MR Egger	4	0.0781498	0.112897	0.560364	-0.143127	0.299427	1.08128	0.866644	1.34909
ebi-a-GCST90001770	gen_samplesize_1finngen_R9_O15_PRE_OR_ECLAMPSIA	outcome	|| id:ebi-a-GCST90001770	Weighted median	4	0.12087	0.0718071	0.0923257	-0.0198722	0.261612	1.12848	0.980324	1.29902
ebi-a-GCST90001770	gen_samplesize_1finngen_R9_O15_PRE_OR_ECLAMPSIA	outcome	|| id:ebi-a-GCST90001770	Weighted mode	4	0.118924	0.0789757	0.229189	-0.0358683	0.273716	1.12628	0.964767	1.31484
ebi-a-GCST90001771	gen_samplesize_1finngen_R9_O15_PRE_OR_ECLAMPSIA	outcome	|| id:ebi-a-GCST90001771	Inverse variance weighted	14	-0.0218682	0.0189286	0.24797	-0.0589683	0.015232	0.978369	0.942737	1.01535
ebi-a-GCST90001771	gen_samplesize_1finngen_R9_O15_PRE_OR_ECLAMPSIA	outcome	|| id:ebi-a-GCST90001771	MR Egger	14	-0.00567512	0.0241772	0.818376	-0.0530624	0.0417122	0.994341	0.948321	1.04259
ebi-a-GCST90001771	gen_samplesize_1finngen_R9_O15_PRE_OR_ECLAMPSIA	outcome	|| id:ebi-a-GCST90001771	Weighted median	14	-0.00821404	0.0216189	0.703985	-0.0505871	0.034159	0.99182	0.950671	1.03475
ebi-a-GCST90001771	gen_samplesize_1finngen_R9_O15_PRE_OR_ECLAMPSIA	outcome	|| id:ebi-a-GCST90001771	Weighted mode	14	-0.0085559	0.0177013	0.636888	-0.0432505	0.0261387	0.991481	0.957671	1.02648
ebi-a-GCST90001772	gen_samplesize_1finngen_R9_O15_PRE_OR_ECLAMPSIA	outcome	|| id:ebi-a-GCST90001772	Inverse variance weighted	15	-0.00847453	0.0173348	0.624931	-0.0424507	0.0255017	0.991561	0.958438	1.02583
ebi-a-GCST90001772	gen_samplesize_1finngen_R9_O15_PRE_OR_ECLAMPSIA	outcome	|| id:ebi-a-GCST90001772	MR Egger	15	-0.0102695	0.0219502	0.647637	-0.0532919	0.032753	0.989783	0.948103	1.0333
ebi-a-GCST90001772	gen_samplesize_1finngen_R9_O15_PRE_OR_ECLAMPSIA	outcome	|| id:ebi-a-GCST90001772	Weighted median	15	-0.00272311	0.0241938	0.910384	-0.0501429	0.0446967	0.997281	0.951094	1.04571
ebi-a-GCST90001772	gen_samplesize_1finngen_R9_O15_PRE_OR_ECLAMPSIA	outcome	|| id:ebi-a-GCST90001772	Weighted mode	15	-0.004764	0.0204431	0.819105	-0.0448325	0.0353045	0.995247	0.956158	1.03594
ebi-a-GCST90001773	gen_samplesize_1finngen_R9_O15_PRE_OR_ECLAMPSIA	outcome	|| id:ebi-a-GCST90001773	Inverse variance weighted	22	0.000521844	0.0161385	0.974205	-0.0311097	0.0321534	1.00052	0.969369	1.03268
ebi-a-GCST90001773	gen_samplesize_1finngen_R9_O15_PRE_OR_ECLAMPSIA	outcome	|| id:ebi-a-GCST90001773	MR Egger	22	-0.013548	0.0227333	0.557891	-0.0581053	0.0310093	0.986543	0.943551	1.0315
ebi-a-GCST90001773	gen_samplesize_1finngen_R9_O15_PRE_OR_ECLAMPSIA	outcome	|| id:ebi-a-GCST90001773	Weighted median	22	-0.0105382	0.0223448	0.6372	-0.0543339	0.0332575	0.989517	0.947116	1.03382
ebi-a-GCST90001773	gen_samplesize_1finngen_R9_O15_PRE_OR_ECLAMPSIA	outcome	|| id:ebi-a-GCST90001773	Weighted mode	22	-0.0113863	0.019629	0.568037	-0.0498591	0.0270865	0.988678	0.951363	1.02746
ebi-a-GCST90001774	gen_samplesize_1finngen_R9_O15_PRE_OR_ECLAMPSIA	outcome	|| id:ebi-a-GCST90001774	Inverse variance weighted	11	-0.04168	0.044783	0.352003	-0.129455	0.0460947	0.959177	0.878574	1.04717
ebi-a-GCST90001774	gen_samplesize_1finngen_R9_O15_PRE_OR_ECLAMPSIA	outcome	|| id:ebi-a-GCST90001774	MR Egger	11	-0.0225931	0.0956806	0.818618	-0.210127	0.164941	0.97766	0.810481	1.17932
ebi-a-GCST90001774	gen_samplesize_1finngen_R9_O15_PRE_OR_ECLAMPSIA	outcome	|| id:ebi-a-GCST90001774	Weighted median	11	0.00587262	0.0566013	0.917364	-0.105066	0.116811	1.00589	0.900265	1.12391
ebi-a-GCST90001774	gen_samplesize_1finngen_R9_O15_PRE_OR_ECLAMPSIA	outcome	|| id:ebi-a-GCST90001774	Weighted mode	11	-0.000200954	0.0670545	0.997668	-0.131628	0.131226	0.999799	0.876667	1.14023
ebi-a-GCST90001775	gen_samplesize_1finngen_R9_O15_PRE_OR_ECLAMPSIA	outcome	|| id:ebi-a-GCST90001775	Inverse variance weighted	12	0.000161412	0.0185596	0.993061	-0.0362154	0.0365382	1.00016	0.964433	1.03721
ebi-a-GCST90001775	gen_samplesize_1finngen_R9_O15_PRE_OR_ECLAMPSIA	outcome	|| id:ebi-a-GCST90001775	MR Egger	12	-0.0152251	0.0217747	0.50036	-0.0579035	0.0274533	0.98489	0.943741	1.02783
ebi-a-GCST90001775	gen_samplesize_1finngen_R9_O15_PRE_OR_ECLAMPSIA	outcome	|| id:ebi-a-GCST90001775	Weighted median	12	-0.00741068	0.0213517	0.728534	-0.0492601	0.0344387	0.992617	0.951934	1.03504
ebi-a-GCST90001775	gen_samplesize_1finngen_R9_O15_PRE_OR_ECLAMPSIA	outcome	|| id:ebi-a-GCST90001775	Weighted mode	12	-0.00863488	0.0221794	0.704471	-0.0521064	0.0348367	0.991402	0.949228	1.03545
ebi-a-GCST90001776	gen_samplesize_1finngen_R9_O15_PRE_OR_ECLAMPSIA	outcome	|| id:ebi-a-GCST90001776	Inverse variance weighted (multiplicative random effects)	12	-0.0393577	0.0351205	0.262438	-0.108194	0.0294785	0.961407	0.897454	1.02992
ebi-a-GCST90001776	gen_samplesize_1finngen_R9_O15_PRE_OR_ECLAMPSIA	outcome	|| id:ebi-a-GCST90001776	MR Egger	12	-0.020732	0.0531468	0.704651	-0.1249	0.0834357	0.979481	0.882586	1.08702
ebi-a-GCST90001776	gen_samplesize_1finngen_R9_O15_PRE_OR_ECLAMPSIA	outcome	|| id:ebi-a-GCST90001776	Weighted median	12	-0.042372	0.0344863	0.219198	-0.109965	0.025221	0.958513	0.895865	1.02554
ebi-a-GCST90001776	gen_samplesize_1finngen_R9_O15_PRE_OR_ECLAMPSIA	outcome	|| id:ebi-a-GCST90001776	Weighted mode	12	-0.0309618	0.032745	0.364689	-0.0951419	0.0332184	0.969513	0.909244	1.03378
ebi-a-GCST90001777	gen_samplesize_1finngen_R9_O15_PRE_OR_ECLAMPSIA	outcome	|| id:ebi-a-GCST90001777	Inverse variance weighted	14	0.00254918	0.033182	0.938763	-0.0624874	0.0675858	1.00255	0.939425	1.06992
ebi-a-GCST90001777	gen_samplesize_1finngen_R9_O15_PRE_OR_ECLAMPSIA	outcome	|| id:ebi-a-GCST90001777	MR Egger	14	0.178571	0.0729376	0.0306898	0.0356137	0.321529	1.19551	1.03626	1.37924
ebi-a-GCST90001777	gen_samplesize_1finngen_R9_O15_PRE_OR_ECLAMPSIA	outcome	|| id:ebi-a-GCST90001777	Weighted median	14	0.0352984	0.0410933	0.390351	-0.0452445	0.115841	1.03593	0.955764	1.12282
ebi-a-GCST90001777	gen_samplesize_1finngen_R9_O15_PRE_OR_ECLAMPSIA	outcome	|| id:ebi-a-GCST90001777	Weighted mode	14	0.062405	0.042878	0.169276	-0.0216358	0.146446	1.06439	0.978597	1.15771
ebi-a-GCST90001778	gen_samplesize_1finngen_R9_O15_PRE_OR_ECLAMPSIA	outcome	|| id:ebi-a-GCST90001778	Inverse variance weighted (multiplicative random effects)	13	0.0161511	0.0393159	0.681217	-0.0609081	0.0932103	1.01628	0.94091	1.09769
ebi-a-GCST90001778	gen_samplesize_1finngen_R9_O15_PRE_OR_ECLAMPSIA	outcome	|| id:ebi-a-GCST90001778	MR Egger	13	0.0708918	0.0712587	0.341189	-0.0687752	0.210559	1.07347	0.933537	1.23437
ebi-a-GCST90001778	gen_samplesize_1finngen_R9_O15_PRE_OR_ECLAMPSIA	outcome	|| id:ebi-a-GCST90001778	Weighted median	13	0.0590376	0.040906	0.14895	-0.0211382	0.139213	1.06082	0.979084	1.14937
ebi-a-GCST90001778	gen_samplesize_1finngen_R9_O15_PRE_OR_ECLAMPSIA	outcome	|| id:ebi-a-GCST90001778	Weighted mode	13	0.0867329	0.0456883	0.0819561	-0.00281611	0.176282	1.09061	0.997188	1.19277
ebi-a-GCST90001779	gen_samplesize_1finngen_R9_O15_PRE_OR_ECLAMPSIA	outcome	|| id:ebi-a-GCST90001779	Inverse variance weighted	16	0.00841211	0.0141073	0.550978	-0.0192382	0.0360624	1.00845	0.980946	1.03672
ebi-a-GCST90001779	gen_samplesize_1finngen_R9_O15_PRE_OR_ECLAMPSIA	outcome	|| id:ebi-a-GCST90001779	MR Egger	16	-0.0021379	0.0163999	0.898135	-0.0342816	0.0300058	0.997864	0.966299	1.03046
ebi-a-GCST90001779	gen_samplesize_1finngen_R9_O15_PRE_OR_ECLAMPSIA	outcome	|| id:ebi-a-GCST90001779	Weighted median	16	-0.00617543	0.0197136	0.754085	-0.044814	0.0324631	0.993844	0.956175	1.033
ebi-a-GCST90001779	gen_samplesize_1finngen_R9_O15_PRE_OR_ECLAMPSIA	outcome	|| id:ebi-a-GCST90001779	Weighted mode	16	-0.00139841	0.0167948	0.934742	-0.0343162	0.0315194	0.998603	0.966266	1.03202
ebi-a-GCST90001780	gen_samplesize_1finngen_R9_O15_PRE_OR_ECLAMPSIA	outcome	|| id:ebi-a-GCST90001780	Inverse variance weighted	14	-0.00814648	0.031403	0.795313	-0.0696963	0.0534033	0.991887	0.932677	1.05485
ebi-a-GCST90001780	gen_samplesize_1finngen_R9_O15_PRE_OR_ECLAMPSIA	outcome	|| id:ebi-a-GCST90001780	MR Egger	14	-0.0212951	0.0510334	0.683844	-0.121321	0.0787304	0.97893	0.88575	1.08191
ebi-a-GCST90001780	gen_samplesize_1finngen_R9_O15_PRE_OR_ECLAMPSIA	outcome	|| id:ebi-a-GCST90001780	Weighted median	14	-0.0147767	0.0430314	0.731303	-0.0991183	0.0695649	0.985332	0.905636	1.07204
ebi-a-GCST90001780	gen_samplesize_1finngen_R9_O15_PRE_OR_ECLAMPSIA	outcome	|| id:ebi-a-GCST90001780	Weighted mode	14	-0.00220911	0.0596797	0.971035	-0.119181	0.114763	0.997793	0.887647	1.12161
ebi-a-GCST90001781	gen_samplesize_1finngen_R9_O15_PRE_OR_ECLAMPSIA	outcome	|| id:ebi-a-GCST90001781	Inverse variance weighted	14	0.0106082	0.0180895	0.557587	-0.0248472	0.0460637	1.01066	0.975459	1.04714
ebi-a-GCST90001781	gen_samplesize_1finngen_R9_O15_PRE_OR_ECLAMPSIA	outcome	|| id:ebi-a-GCST90001781	MR Egger	14	-0.00480282	0.0260718	0.856921	-0.0559035	0.0462978	0.995209	0.94563	1.04739
ebi-a-GCST90001781	gen_samplesize_1finngen_R9_O15_PRE_OR_ECLAMPSIA	outcome	|| id:ebi-a-GCST90001781	Weighted median	14	0.00966832	0.0234354	0.679935	-0.0362651	0.0556017	1.00972	0.964385	1.05718
ebi-a-GCST90001781	gen_samplesize_1finngen_R9_O15_PRE_OR_ECLAMPSIA	outcome	|| id:ebi-a-GCST90001781	Weighted mode	14	0.00723125	0.0229897	0.7581	-0.0378285	0.052291	1.00726	0.962878	1.05368
ebi-a-GCST90001782	gen_samplesize_1finngen_R9_O15_PRE_OR_ECLAMPSIA	outcome	|| id:ebi-a-GCST90001782	Inverse variance weighted	13	0.0213343	0.0147163	0.14714	-0.00750957	0.0501781	1.02156	0.992519	1.05146
ebi-a-GCST90001782	gen_samplesize_1finngen_R9_O15_PRE_OR_ECLAMPSIA	outcome	|| id:ebi-a-GCST90001782	MR Egger	13	0.0257577	0.0189397	0.201055	-0.011364	0.0628795	1.02609	0.9887	1.0649
ebi-a-GCST90001782	gen_samplesize_1finngen_R9_O15_PRE_OR_ECLAMPSIA	outcome	|| id:ebi-a-GCST90001782	Weighted median	13	0.0165078	0.0171928	0.336977	-0.0171902	0.0502057	1.01664	0.982957	1.05149
ebi-a-GCST90001782	gen_samplesize_1finngen_R9_O15_PRE_OR_ECLAMPSIA	outcome	|| id:ebi-a-GCST90001782	Weighted mode	13	0.0164181	0.0148778	0.291436	-0.0127424	0.0455786	1.01655	0.987338	1.04663
ebi-a-GCST90001783	gen_samplesize_1finngen_R9_O15_PRE_OR_ECLAMPSIA	outcome	|| id:ebi-a-GCST90001783	Inverse variance weighted	10	0.0121334	0.0383068	0.75144	-0.062948	0.0872147	1.01221	0.938992	1.09113
ebi-a-GCST90001783	gen_samplesize_1finngen_R9_O15_PRE_OR_ECLAMPSIA	outcome	|| id:ebi-a-GCST90001783	MR Egger	10	0.0338534	0.136289	0.810087	-0.233273	0.30098	1.03443	0.791937	1.35118
ebi-a-GCST90001783	gen_samplesize_1finngen_R9_O15_PRE_OR_ECLAMPSIA	outcome	|| id:ebi-a-GCST90001783	Weighted median	10	0.0596207	0.0516484	0.248353	-0.0416101	0.160852	1.06143	0.959244	1.17451
ebi-a-GCST90001783	gen_samplesize_1finngen_R9_O15_PRE_OR_ECLAMPSIA	outcome	|| id:ebi-a-GCST90001783	Weighted mode	10	0.0443201	0.0670834	0.525371	-0.0871634	0.175804	1.04532	0.916527	1.1922
ebi-a-GCST90001784	gen_samplesize_1finngen_R9_O15_PRE_OR_ECLAMPSIA	outcome	|| id:ebi-a-GCST90001784	Inverse variance weighted	15	0.0162983	0.0219286	0.457332	-0.0266816	0.0592783	1.01643	0.973671	1.06107
ebi-a-GCST90001784	gen_samplesize_1finngen_R9_O15_PRE_OR_ECLAMPSIA	outcome	|| id:ebi-a-GCST90001784	MR Egger	15	-0.0076546	0.0269562	0.78091	-0.0604888	0.0451796	0.992375	0.941304	1.04622
ebi-a-GCST90001784	gen_samplesize_1finngen_R9_O15_PRE_OR_ECLAMPSIA	outcome	|| id:ebi-a-GCST90001784	Weighted median	15	0.00545531	0.0280277	0.845675	-0.0494791	0.0603897	1.00547	0.951725	1.06225
ebi-a-GCST90001784	gen_samplesize_1finngen_R9_O15_PRE_OR_ECLAMPSIA	outcome	|| id:ebi-a-GCST90001784	Weighted mode	15	0.0142819	0.0235851	0.554506	-0.0319449	0.0605087	1.01438	0.96856	1.06238
ebi-a-GCST90001785	gen_samplesize_1finngen_R9_O15_PRE_OR_ECLAMPSIA	outcome	|| id:ebi-a-GCST90001785	Inverse variance weighted	17	-0.0593383	0.0312858	0.0578742	-0.120659	0.00198196	0.942388	0.886337	1.00198
ebi-a-GCST90001785	gen_samplesize_1finngen_R9_O15_PRE_OR_ECLAMPSIA	outcome	|| id:ebi-a-GCST90001785	MR Egger	17	0.00319034	0.0557053	0.955085	-0.105992	0.112373	1.0032	0.899432	1.11893
ebi-a-GCST90001785	gen_samplesize_1finngen_R9_O15_PRE_OR_ECLAMPSIA	outcome	|| id:ebi-a-GCST90001785	Weighted median	17	-0.033347	0.043332	0.441556	-0.118278	0.0515838	0.967203	0.888449	1.05294
ebi-a-GCST90001785	gen_samplesize_1finngen_R9_O15_PRE_OR_ECLAMPSIA	outcome	|| id:ebi-a-GCST90001785	Weighted mode	17	-0.0111851	0.0534639	0.836926	-0.115974	0.0936042	0.988877	0.890498	1.09812
ebi-a-GCST90001786	gen_samplesize_1finngen_R9_O15_PRE_OR_ECLAMPSIA	outcome	|| id:ebi-a-GCST90001786	Inverse variance weighted	13	0.056446	0.0325869	0.0832436	-0.00742432	0.120316	1.05807	0.992603	1.12785
ebi-a-GCST90001786	gen_samplesize_1finngen_R9_O15_PRE_OR_ECLAMPSIA	outcome	|| id:ebi-a-GCST90001786	MR Egger	13	0.108073	0.0625714	0.112068	-0.0145671	0.230713	1.11413	0.985538	1.2595
ebi-a-GCST90001786	gen_samplesize_1finngen_R9_O15_PRE_OR_ECLAMPSIA	outcome	|| id:ebi-a-GCST90001786	Weighted median	13	0.0779328	0.0429453	0.0695701	-0.00623996	0.162106	1.08105	0.993779	1.17598
ebi-a-GCST90001786	gen_samplesize_1finngen_R9_O15_PRE_OR_ECLAMPSIA	outcome	|| id:ebi-a-GCST90001786	Weighted mode	13	0.0808067	0.0476615	0.115761	-0.0126098	0.174223	1.08416	0.987469	1.19032
ebi-a-GCST90001787	gen_samplesize_1finngen_R9_O15_PRE_OR_ECLAMPSIA	outcome	|| id:ebi-a-GCST90001787	Inverse variance weighted	12	-0.0209955	0.0224334	0.349322	-0.064965	0.022974	0.979223	0.9371	1.02324
ebi-a-GCST90001787	gen_samplesize_1finngen_R9_O15_PRE_OR_ECLAMPSIA	outcome	|| id:ebi-a-GCST90001787	MR Egger	12	-0.0293613	0.0302689	0.354914	-0.0886883	0.0299656	0.971066	0.915131	1.03042
ebi-a-GCST90001787	gen_samplesize_1finngen_R9_O15_PRE_OR_ECLAMPSIA	outcome	|| id:ebi-a-GCST90001787	Weighted median	12	-0.0247368	0.0266951	0.354112	-0.0770593	0.0275856	0.975567	0.925835	1.02797
ebi-a-GCST90001787	gen_samplesize_1finngen_R9_O15_PRE_OR_ECLAMPSIA	outcome	|| id:ebi-a-GCST90001787	Weighted mode	12	-0.0207732	0.0223756	0.373131	-0.0646294	0.023083	0.979441	0.937415	1.02335
ebi-a-GCST90001788	gen_samplesize_1finngen_R9_O15_PRE_OR_ECLAMPSIA	outcome	|| id:ebi-a-GCST90001788	Inverse variance weighted	11	-0.0157093	0.0376396	0.676414	-0.089483	0.0580643	0.984413	0.914404	1.05978
ebi-a-GCST90001788	gen_samplesize_1finngen_R9_O15_PRE_OR_ECLAMPSIA	outcome	|| id:ebi-a-GCST90001788	MR Egger	11	0.00971996	0.0608338	0.876584	-0.109514	0.128954	1.00977	0.896269	1.13764
ebi-a-GCST90001788	gen_samplesize_1finngen_R9_O15_PRE_OR_ECLAMPSIA	outcome	|| id:ebi-a-GCST90001788	Weighted median	11	-0.000348208	0.0504389	0.994492	-0.0992084	0.098512	0.999652	0.905554	1.10353
ebi-a-GCST90001788	gen_samplesize_1finngen_R9_O15_PRE_OR_ECLAMPSIA	outcome	|| id:ebi-a-GCST90001788	Weighted mode	11	-0.00725076	0.0490384	0.885393	-0.103366	0.0888644	0.992775	0.901797	1.09293
ebi-a-GCST90001789	gen_samplesize_1finngen_R9_O15_PRE_OR_ECLAMPSIA	outcome	|| id:ebi-a-GCST90001789	Inverse variance weighted	12	0.0164976	0.0330493	0.617653	-0.0482791	0.0812742	1.01663	0.952868	1.08467
ebi-a-GCST90001789	gen_samplesize_1finngen_R9_O15_PRE_OR_ECLAMPSIA	outcome	|| id:ebi-a-GCST90001789	MR Egger	12	-0.0466828	0.0581348	0.440638	-0.160627	0.0672615	0.95439	0.85161	1.06958
ebi-a-GCST90001789	gen_samplesize_1finngen_R9_O15_PRE_OR_ECLAMPSIA	outcome	|| id:ebi-a-GCST90001789	Weighted median	12	-0.00306459	0.0429331	0.943095	-0.0872135	0.0810843	0.99694	0.916481	1.08446
ebi-a-GCST90001789	gen_samplesize_1finngen_R9_O15_PRE_OR_ECLAMPSIA	outcome	|| id:ebi-a-GCST90001789	Weighted mode	12	-0.020302	0.046783	0.672705	-0.111997	0.0713926	0.979903	0.894047	1.074
ebi-a-GCST90001790	gen_samplesize_1finngen_R9_O15_PRE_OR_ECLAMPSIA	outcome	|| id:ebi-a-GCST90001790	Inverse variance weighted	13	0.0372352	0.0322469	0.248217	-0.0259687	0.100439	1.03794	0.974366	1.10566
ebi-a-GCST90001790	gen_samplesize_1finngen_R9_O15_PRE_OR_ECLAMPSIA	outcome	|| id:ebi-a-GCST90001790	MR Egger	13	0.11475	0.0762887	0.160701	-0.0347761	0.264275	1.12159	0.965822	1.30249
ebi-a-GCST90001790	gen_samplesize_1finngen_R9_O15_PRE_OR_ECLAMPSIA	outcome	|| id:ebi-a-GCST90001790	Weighted median	13	0.0564811	0.0417364	0.175966	-0.0253222	0.138284	1.05811	0.974996	1.1483
ebi-a-GCST90001790	gen_samplesize_1finngen_R9_O15_PRE_OR_ECLAMPSIA	outcome	|| id:ebi-a-GCST90001790	Weighted mode	13	0.0724292	0.0432797	0.120072	-0.012399	0.157258	1.07512	0.987678	1.1703
ebi-a-GCST90001791	gen_samplesize_1finngen_R9_O15_PRE_OR_ECLAMPSIA	outcome	|| id:ebi-a-GCST90001791	Inverse variance weighted	15	0.0104644	0.0328989	0.750426	-0.0540175	0.0749463	1.01052	0.947416	1.07783
ebi-a-GCST90001791	gen_samplesize_1finngen_R9_O15_PRE_OR_ECLAMPSIA	outcome	|| id:ebi-a-GCST90001791	MR Egger	15	-0.0734076	0.0602641	0.244833	-0.191525	0.04471	0.929222	0.825699	1.04572
ebi-a-GCST90001791	gen_samplesize_1finngen_R9_O15_PRE_OR_ECLAMPSIA	outcome	|| id:ebi-a-GCST90001791	Weighted median	15	-0.0151932	0.0451578	0.736534	-0.103702	0.0733161	0.984922	0.901493	1.07607
ebi-a-GCST90001791	gen_samplesize_1finngen_R9_O15_PRE_OR_ECLAMPSIA	outcome	|| id:ebi-a-GCST90001791	Weighted mode	15	-0.00666144	0.0546099	0.904647	-0.113697	0.100374	0.993361	0.892529	1.10558
ebi-a-GCST90001792	gen_samplesize_1finngen_R9_O15_PRE_OR_ECLAMPSIA	outcome	|| id:ebi-a-GCST90001792	Inverse variance weighted (multiplicative random effects)	15	0.0262958	0.0340114	0.439434	-0.0403664	0.0929581	1.02664	0.960437	1.09742
ebi-a-GCST90001792	gen_samplesize_1finngen_R9_O15_PRE_OR_ECLAMPSIA	outcome	|| id:ebi-a-GCST90001792	MR Egger	15	0.0705837	0.0776851	0.380103	-0.081679	0.222846	1.07313	0.921568	1.24963
ebi-a-GCST90001792	gen_samplesize_1finngen_R9_O15_PRE_OR_ECLAMPSIA	outcome	|| id:ebi-a-GCST90001792	Weighted median	15	0.0588335	0.0389901	0.131316	-0.0175871	0.135254	1.0606	0.982567	1.14483
ebi-a-GCST90001792	gen_samplesize_1finngen_R9_O15_PRE_OR_ECLAMPSIA	outcome	|| id:ebi-a-GCST90001792	Weighted mode	15	0.0849998	0.0432851	0.0697389	0.00016092	0.169839	1.08872	1.00016	1.18511
ebi-a-GCST90001793	gen_samplesize_1finngen_R9_O15_PRE_OR_ECLAMPSIA	outcome	|| id:ebi-a-GCST90001793	Inverse variance weighted	11	-0.0356118	0.0461836	0.440652	-0.126132	0.0549081	0.965015	0.881499	1.05644
ebi-a-GCST90001793	gen_samplesize_1finngen_R9_O15_PRE_OR_ECLAMPSIA	outcome	|| id:ebi-a-GCST90001793	MR Egger	11	-0.068913	0.11395	0.560273	-0.292256	0.15443	0.933408	0.746577	1.16699
ebi-a-GCST90001793	gen_samplesize_1finngen_R9_O15_PRE_OR_ECLAMPSIA	outcome	|| id:ebi-a-GCST90001793	Weighted median	11	-0.0158268	0.0479981	0.741597	-0.109903	0.0782494	0.984298	0.895921	1.08139
ebi-a-GCST90001793	gen_samplesize_1finngen_R9_O15_PRE_OR_ECLAMPSIA	outcome	|| id:ebi-a-GCST90001793	Weighted mode	11	-0.0164278	0.0513059	0.755411	-0.116987	0.0841317	0.983706	0.889596	1.08777
ebi-a-GCST90001794	gen_samplesize_1finngen_R9_O15_PRE_OR_ECLAMPSIA	outcome	|| id:ebi-a-GCST90001794	Inverse variance weighted	16	0.00587503	0.0142741	0.680641	-0.0221021	0.0338522	1.00589	0.97814	1.03443
ebi-a-GCST90001794	gen_samplesize_1finngen_R9_O15_PRE_OR_ECLAMPSIA	outcome	|| id:ebi-a-GCST90001794	MR Egger	16	0.000764878	0.0169542	0.964653	-0.0324653	0.033995	1.00077	0.968056	1.03458
ebi-a-GCST90001794	gen_samplesize_1finngen_R9_O15_PRE_OR_ECLAMPSIA	outcome	|| id:ebi-a-GCST90001794	Weighted median	16	0.0021752	0.0193488	0.91049	-0.0357485	0.0400989	1.00218	0.964883	1.04091
ebi-a-GCST90001794	gen_samplesize_1finngen_R9_O15_PRE_OR_ECLAMPSIA	outcome	|| id:ebi-a-GCST90001794	Weighted mode	16	-0.00174448	0.0171608	0.920377	-0.0353796	0.0318906	0.998257	0.965239	1.0324
ebi-a-GCST90001795	gen_samplesize_1finngen_R9_O15_PRE_OR_ECLAMPSIA	outcome	|| id:ebi-a-GCST90001795	Inverse variance weighted	12	0.012217	0.0398552	0.759197	-0.0658991	0.0903331	1.01229	0.936225	1.09454
ebi-a-GCST90001795	gen_samplesize_1finngen_R9_O15_PRE_OR_ECLAMPSIA	outcome	|| id:ebi-a-GCST90001795	MR Egger	12	-0.0399061	0.10659	0.715931	-0.248822	0.16901	0.96088	0.779719	1.18413
ebi-a-GCST90001795	gen_samplesize_1finngen_R9_O15_PRE_OR_ECLAMPSIA	outcome	|| id:ebi-a-GCST90001795	Weighted median	12	0.0634236	0.0527734	0.229438	-0.0400123	0.16686	1.06548	0.960778	1.18159
ebi-a-GCST90001795	gen_samplesize_1finngen_R9_O15_PRE_OR_ECLAMPSIA	outcome	|| id:ebi-a-GCST90001795	Weighted mode	12	0.0596488	0.0637084	0.369231	-0.0652196	0.184517	1.06146	0.936862	1.20264
ebi-a-GCST90001796	gen_samplesize_1finngen_R9_O15_PRE_OR_ECLAMPSIA	outcome	|| id:ebi-a-GCST90001796	Inverse variance weighted	7	0.0296911	0.0326464	0.363099	-0.0342958	0.0936781	1.03014	0.966286	1.09821
ebi-a-GCST90001796	gen_samplesize_1finngen_R9_O15_PRE_OR_ECLAMPSIA	outcome	|| id:ebi-a-GCST90001796	MR Egger	7	0.0746462	0.0461835	0.166953	-0.0158734	0.165166	1.0775	0.984252	1.17959
ebi-a-GCST90001796	gen_samplesize_1finngen_R9_O15_PRE_OR_ECLAMPSIA	outcome	|| id:ebi-a-GCST90001796	Weighted median	7	0.0277707	0.0433271	0.521552	-0.0571504	0.112692	1.02816	0.944452	1.11929
ebi-a-GCST90001796	gen_samplesize_1finngen_R9_O15_PRE_OR_ECLAMPSIA	outcome	|| id:ebi-a-GCST90001796	Weighted mode	7	0.0303817	0.0406164	0.482728	-0.0492264	0.10999	1.03085	0.951966	1.11627
ebi-a-GCST90001797	gen_samplesize_1finngen_R9_O15_PRE_OR_ECLAMPSIA	outcome	|| id:ebi-a-GCST90001797	Inverse variance weighted	13	0.0397797	0.0264049	0.131931	-0.0119738	0.0915332	1.04058	0.988098	1.09585
ebi-a-GCST90001797	gen_samplesize_1finngen_R9_O15_PRE_OR_ECLAMPSIA	outcome	|| id:ebi-a-GCST90001797	MR Egger	13	0.0673564	0.0331495	0.0670321	0.0023833	0.132329	1.06968	1.00239	1.14148
ebi-a-GCST90001797	gen_samplesize_1finngen_R9_O15_PRE_OR_ECLAMPSIA	outcome	|| id:ebi-a-GCST90001797	Weighted median	13	0.0677863	0.0376414	0.0717277	-0.0059909	0.141563	1.07014	0.994027	1.15207
ebi-a-GCST90001797	gen_samplesize_1finngen_R9_O15_PRE_OR_ECLAMPSIA	outcome	|| id:ebi-a-GCST90001797	Weighted mode	13	0.0677654	0.0319577	0.0554886	0.00512823	0.130403	1.07011	1.00514	1.13929
ebi-a-GCST90001798	gen_samplesize_1finngen_R9_O15_PRE_OR_ECLAMPSIA	outcome	|| id:ebi-a-GCST90001798	Inverse variance weighted	20	-0.080363	0.0202241	7.07844e-05	-0.120002	-0.0407238	0.922781	0.886919	0.960094
ebi-a-GCST90001798	gen_samplesize_1finngen_R9_O15_PRE_OR_ECLAMPSIA	outcome	|| id:ebi-a-GCST90001798	MR Egger	20	-0.0549574	0.039489	0.18097	-0.132356	0.0224411	0.946525	0.876029	1.02269
ebi-a-GCST90001798	gen_samplesize_1finngen_R9_O15_PRE_OR_ECLAMPSIA	outcome	|| id:ebi-a-GCST90001798	Weighted median	20	-0.0476142	0.0276314	0.0848542	-0.101772	0.00654341	0.953502	0.903236	1.00656
ebi-a-GCST90001798	gen_samplesize_1finngen_R9_O15_PRE_OR_ECLAMPSIA	outcome	|| id:ebi-a-GCST90001798	Weighted mode	20	-0.0610855	0.0287308	0.0468215	-0.117398	-0.00477302	0.940743	0.889231	0.995238
ebi-a-GCST90001799	gen_samplesize_1finngen_R9_O15_PRE_OR_ECLAMPSIA	outcome	|| id:ebi-a-GCST90001799	Inverse variance weighted	11	-0.0327069	0.0291643	0.262087	-0.089869	0.0244551	0.967822	0.914051	1.02476
ebi-a-GCST90001799	gen_samplesize_1finngen_R9_O15_PRE_OR_ECLAMPSIA	outcome	|| id:ebi-a-GCST90001799	MR Egger	11	-0.0571035	0.0704591	0.438586	-0.195203	0.0809963	0.944496	0.822667	1.08437
ebi-a-GCST90001799	gen_samplesize_1finngen_R9_O15_PRE_OR_ECLAMPSIA	outcome	|| id:ebi-a-GCST90001799	Weighted median	11	-0.00383519	0.0386481	0.920953	-0.0795855	0.0719151	0.996172	0.923499	1.07456
ebi-a-GCST90001799	gen_samplesize_1finngen_R9_O15_PRE_OR_ECLAMPSIA	outcome	|| id:ebi-a-GCST90001799	Weighted mode	11	0.0194868	0.0592081	0.748851	-0.0965611	0.135535	1.01968	0.907954	1.14515
ebi-a-GCST90001800	gen_samplesize_1finngen_R9_O15_PRE_OR_ECLAMPSIA	outcome	|| id:ebi-a-GCST90001800	Inverse variance weighted	22	-0.0038799	0.0190329	0.838469	-0.0411844	0.0334246	0.996128	0.959652	1.03399
ebi-a-GCST90001800	gen_samplesize_1finngen_R9_O15_PRE_OR_ECLAMPSIA	outcome	|| id:ebi-a-GCST90001800	MR Egger	22	0.0109106	0.0301293	0.721056	-0.0481428	0.069964	1.01097	0.952998	1.07247
ebi-a-GCST90001800	gen_samplesize_1finngen_R9_O15_PRE_OR_ECLAMPSIA	outcome	|| id:ebi-a-GCST90001800	Weighted median	22	-0.0200812	0.0297153	0.499176	-0.0783231	0.0381607	0.980119	0.924666	1.0389
ebi-a-GCST90001800	gen_samplesize_1finngen_R9_O15_PRE_OR_ECLAMPSIA	outcome	|| id:ebi-a-GCST90001800	Weighted mode	22	-0.0177839	0.024555	0.476906	-0.0659116	0.0303439	0.982373	0.936214	1.03081
ebi-a-GCST90001801	gen_samplesize_1finngen_R9_O15_PRE_OR_ECLAMPSIA	outcome	|| id:ebi-a-GCST90001801	Inverse variance weighted (multiplicative random effects)	15	0.00843315	0.0220436	0.702041	-0.0347723	0.0516386	1.00847	0.965825	1.053
ebi-a-GCST90001801	gen_samplesize_1finngen_R9_O15_PRE_OR_ECLAMPSIA	outcome	|| id:ebi-a-GCST90001801	MR Egger	15	-0.0154425	0.0411354	0.713412	-0.0960679	0.0651829	0.984676	0.908402	1.06735
ebi-a-GCST90001801	gen_samplesize_1finngen_R9_O15_PRE_OR_ECLAMPSIA	outcome	|| id:ebi-a-GCST90001801	Weighted median	15	-0.0230902	0.0239549	0.335096	-0.0700418	0.0238615	0.977174	0.932355	1.02415
ebi-a-GCST90001801	gen_samplesize_1finngen_R9_O15_PRE_OR_ECLAMPSIA	outcome	|| id:ebi-a-GCST90001801	Weighted mode	15	-0.0245113	0.0226561	0.297587	-0.0689174	0.0198947	0.975787	0.933404	1.02009
ebi-a-GCST90001802	gen_samplesize_1finngen_R9_O15_PRE_OR_ECLAMPSIA	outcome	|| id:ebi-a-GCST90001802	Inverse variance weighted	20	-0.0281661	0.0266005	0.289664	-0.080303	0.0239708	0.972227	0.922837	1.02426
ebi-a-GCST90001802	gen_samplesize_1finngen_R9_O15_PRE_OR_ECLAMPSIA	outcome	|| id:ebi-a-GCST90001802	MR Egger	20	-0.0932345	0.0580691	0.125767	-0.20705	0.0205809	0.91098	0.812979	1.02079
ebi-a-GCST90001802	gen_samplesize_1finngen_R9_O15_PRE_OR_ECLAMPSIA	outcome	|| id:ebi-a-GCST90001802	Weighted median	20	-0.0498511	0.0342912	0.146014	-0.117062	0.0173597	0.951371	0.88953	1.01751
ebi-a-GCST90001802	gen_samplesize_1finngen_R9_O15_PRE_OR_ECLAMPSIA	outcome	|| id:ebi-a-GCST90001802	Weighted mode	20	-0.0610064	0.0366175	0.112106	-0.132777	0.0107638	0.940817	0.875661	1.01082
ebi-a-GCST90001803	gen_samplesize_1finngen_R9_O15_PRE_OR_ECLAMPSIA	outcome	|| id:ebi-a-GCST90001803	Inverse variance weighted	11	0.0264869	0.0432138	0.539925	-0.0582121	0.111186	1.02684	0.94345	1.1176
ebi-a-GCST90001803	gen_samplesize_1finngen_R9_O15_PRE_OR_ECLAMPSIA	outcome	|| id:ebi-a-GCST90001803	MR Egger	11	0.419084	0.220137	0.0893521	-0.012385	0.850554	1.52057	0.987691	2.34094
ebi-a-GCST90001803	gen_samplesize_1finngen_R9_O15_PRE_OR_ECLAMPSIA	outcome	|| id:ebi-a-GCST90001803	Weighted median	11	0.0578153	0.0595431	0.331558	-0.0588893	0.17452	1.05952	0.942811	1.19067
ebi-a-GCST90001803	gen_samplesize_1finngen_R9_O15_PRE_OR_ECLAMPSIA	outcome	|| id:ebi-a-GCST90001803	Weighted mode	11	0.0891469	0.0776648	0.277752	-0.0630761	0.24137	1.09324	0.938872	1.27299
ebi-a-GCST90001804	gen_samplesize_1finngen_R9_O15_PRE_OR_ECLAMPSIA	outcome	|| id:ebi-a-GCST90001804	Inverse variance weighted	22	-0.0383061	0.0218122	0.0790582	-0.0810581	0.00444583	0.962418	0.92214	1.00446
ebi-a-GCST90001804	gen_samplesize_1finngen_R9_O15_PRE_OR_ECLAMPSIA	outcome	|| id:ebi-a-GCST90001804	MR Egger	22	-0.0264977	0.0446878	0.559859	-0.114086	0.0610904	0.97385	0.892181	1.06299
ebi-a-GCST90001804	gen_samplesize_1finngen_R9_O15_PRE_OR_ECLAMPSIA	outcome	|| id:ebi-a-GCST90001804	Weighted median	22	-0.0373366	0.0278403	0.179888	-0.0919037	0.0172304	0.963352	0.912193	1.01738
ebi-a-GCST90001804	gen_samplesize_1finngen_R9_O15_PRE_OR_ECLAMPSIA	outcome	|| id:ebi-a-GCST90001804	Weighted mode	22	-0.0530636	0.0272147	0.0646762	-0.106404	0.00027719	0.94832	0.899061	1.00028
ebi-a-GCST90001805	gen_samplesize_1finngen_R9_O15_PRE_OR_ECLAMPSIA	outcome	|| id:ebi-a-GCST90001805	Inverse variance weighted	19	0.0099187	0.015088	0.51093	-0.0196538	0.0394912	1.00997	0.980538	1.04028
ebi-a-GCST90001805	gen_samplesize_1finngen_R9_O15_PRE_OR_ECLAMPSIA	outcome	|| id:ebi-a-GCST90001805	MR Egger	19	0.0156104	0.0197516	0.440216	-0.0231026	0.0543235	1.01573	0.977162	1.05583
ebi-a-GCST90001805	gen_samplesize_1finngen_R9_O15_PRE_OR_ECLAMPSIA	outcome	|| id:ebi-a-GCST90001805	Weighted median	19	0.0130357	0.0161416	0.41933	-0.0186018	0.0446731	1.01312	0.98157	1.04569
ebi-a-GCST90001805	gen_samplesize_1finngen_R9_O15_PRE_OR_ECLAMPSIA	outcome	|| id:ebi-a-GCST90001805	Weighted mode	19	0.00747972	0.0157655	0.640895	-0.0234208	0.0383802	1.00751	0.976851	1.03913
ebi-a-GCST90001806	gen_samplesize_1finngen_R9_O15_PRE_OR_ECLAMPSIA	outcome	|| id:ebi-a-GCST90001806	Inverse variance weighted (multiplicative random effects)	24	-0.0155497	0.0266698	0.559863	-0.0678224	0.0367231	0.984571	0.934426	1.03741
ebi-a-GCST90001806	gen_samplesize_1finngen_R9_O15_PRE_OR_ECLAMPSIA	outcome	|| id:ebi-a-GCST90001806	MR Egger	24	-0.0235596	0.0557039	0.676443	-0.132739	0.0856201	0.976716	0.875693	1.08939
ebi-a-GCST90001806	gen_samplesize_1finngen_R9_O15_PRE_OR_ECLAMPSIA	outcome	|| id:ebi-a-GCST90001806	Weighted median	24	-0.0448566	0.032402	0.166243	-0.108364	0.0186513	0.956135	0.897301	1.01883
ebi-a-GCST90001806	gen_samplesize_1finngen_R9_O15_PRE_OR_ECLAMPSIA	outcome	|| id:ebi-a-GCST90001806	Weighted mode	24	-0.0583799	0.0346379	0.105426	-0.12627	0.0095103	0.943292	0.881377	1.00956
ebi-a-GCST90001807	gen_samplesize_1finngen_R9_O15_PRE_OR_ECLAMPSIA	outcome	|| id:ebi-a-GCST90001807	Inverse variance weighted	9	-0.0387489	0.0494945	0.433689	-0.135758	0.0582603	0.961992	0.873054	1.05999
ebi-a-GCST90001807	gen_samplesize_1finngen_R9_O15_PRE_OR_ECLAMPSIA	outcome	|| id:ebi-a-GCST90001807	MR Egger	9	-0.0262115	0.185904	0.891846	-0.390584	0.33816	0.974129	0.676662	1.40237
ebi-a-GCST90001807	gen_samplesize_1finngen_R9_O15_PRE_OR_ECLAMPSIA	outcome	|| id:ebi-a-GCST90001807	Weighted median	9	-0.0463005	0.0657201	0.481114	-0.175112	0.0825108	0.954755	0.839363	1.08601
ebi-a-GCST90001807	gen_samplesize_1finngen_R9_O15_PRE_OR_ECLAMPSIA	outcome	|| id:ebi-a-GCST90001807	Weighted mode	9	-0.0714677	0.0954408	0.475405	-0.258532	0.115596	0.931026	0.772185	1.12254
ebi-a-GCST90001808	gen_samplesize_1finngen_R9_O15_PRE_OR_ECLAMPSIA	outcome	|| id:ebi-a-GCST90001808	Inverse variance weighted	24	-0.039545	0.0197795	0.0455766	-0.0783128	-0.000777201	0.961227	0.924675	0.999223
ebi-a-GCST90001808	gen_samplesize_1finngen_R9_O15_PRE_OR_ECLAMPSIA	outcome	|| id:ebi-a-GCST90001808	MR Egger	24	-0.0308347	0.0391639	0.439491	-0.107596	0.0459264	0.969636	0.89799	1.047
ebi-a-GCST90001808	gen_samplesize_1finngen_R9_O15_PRE_OR_ECLAMPSIA	outcome	|| id:ebi-a-GCST90001808	Weighted median	24	-0.0398622	0.0284975	0.161873	-0.0957173	0.0159928	0.960922	0.908721	1.01612
ebi-a-GCST90001808	gen_samplesize_1finngen_R9_O15_PRE_OR_ECLAMPSIA	outcome	|| id:ebi-a-GCST90001808	Weighted mode	24	-0.0504709	0.0273946	0.0783511	-0.104164	0.00322251	0.950782	0.901077	1.00323
ebi-a-GCST90001809	gen_samplesize_1finngen_R9_O15_PRE_OR_ECLAMPSIA	outcome	|| id:ebi-a-GCST90001809	Inverse variance weighted	9	0.0567905	0.0543003	0.295626	-0.0496381	0.163219	1.05843	0.951574	1.17729
ebi-a-GCST90001809	gen_samplesize_1finngen_R9_O15_PRE_OR_ECLAMPSIA	outcome	|| id:ebi-a-GCST90001809	MR Egger	9	-0.0882298	0.0989014	0.401964	-0.282077	0.105617	0.91555	0.754216	1.1114
ebi-a-GCST90001809	gen_samplesize_1finngen_R9_O15_PRE_OR_ECLAMPSIA	outcome	|| id:ebi-a-GCST90001809	Weighted median	9	0.0495985	0.0680055	0.4658	-0.0836923	0.182889	1.05085	0.919714	1.20068
ebi-a-GCST90001809	gen_samplesize_1finngen_R9_O15_PRE_OR_ECLAMPSIA	outcome	|| id:ebi-a-GCST90001809	Weighted mode	9	0.054208	0.0938064	0.579248	-0.129652	0.238069	1.0557	0.878401	1.2688
ebi-a-GCST90001810	gen_samplesize_1finngen_R9_O15_PRE_OR_ECLAMPSIA	outcome	|| id:ebi-a-GCST90001810	Inverse variance weighted	10	-0.0117113	0.0243974	0.631213	-0.0595303	0.0361077	0.988357	0.942207	1.03677
ebi-a-GCST90001810	gen_samplesize_1finngen_R9_O15_PRE_OR_ECLAMPSIA	outcome	|| id:ebi-a-GCST90001810	MR Egger	10	0.0176036	0.0441805	0.700724	-0.0689902	0.104197	1.01776	0.933336	1.10982
ebi-a-GCST90001810	gen_samplesize_1finngen_R9_O15_PRE_OR_ECLAMPSIA	outcome	|| id:ebi-a-GCST90001810	Weighted median	10	-0.0314259	0.0352131	0.372152	-0.100443	0.0375917	0.969063	0.904436	1.03831
ebi-a-GCST90001810	gen_samplesize_1finngen_R9_O15_PRE_OR_ECLAMPSIA	outcome	|| id:ebi-a-GCST90001810	Weighted mode	10	-0.0539022	0.0538608	0.343084	-0.159469	0.051665	0.947525	0.852596	1.05302
ebi-a-GCST90001811	gen_samplesize_1finngen_R9_O15_PRE_OR_ECLAMPSIA	outcome	|| id:ebi-a-GCST90001811	Inverse variance weighted	12	-0.0213749	0.0376341	0.570058	-0.0951379	0.052388	0.978852	0.909248	1.05378
ebi-a-GCST90001811	gen_samplesize_1finngen_R9_O15_PRE_OR_ECLAMPSIA	outcome	|| id:ebi-a-GCST90001811	MR Egger	12	-0.0167862	0.0633018	0.796259	-0.140858	0.107285	0.983354	0.868613	1.11325
ebi-a-GCST90001811	gen_samplesize_1finngen_R9_O15_PRE_OR_ECLAMPSIA	outcome	|| id:ebi-a-GCST90001811	Weighted median	12	-0.0430289	0.0483193	0.373191	-0.137735	0.051677	0.957884	0.87133	1.05304
ebi-a-GCST90001811	gen_samplesize_1finngen_R9_O15_PRE_OR_ECLAMPSIA	outcome	|| id:ebi-a-GCST90001811	Weighted mode	12	-0.0531105	0.0573553	0.37432	-0.165527	0.0593059	0.948275	0.847447	1.0611
ebi-a-GCST90001812	gen_samplesize_1finngen_R9_O15_PRE_OR_ECLAMPSIA	outcome	|| id:ebi-a-GCST90001812	Inverse variance weighted	9	-0.0212567	0.030237	0.482053	-0.0805212	0.0380078	0.978968	0.922635	1.03874
ebi-a-GCST90001812	gen_samplesize_1finngen_R9_O15_PRE_OR_ECLAMPSIA	outcome	|| id:ebi-a-GCST90001812	MR Egger	9	-0.0188012	0.0706525	0.797824	-0.15728	0.119678	0.981374	0.854465	1.12713
ebi-a-GCST90001812	gen_samplesize_1finngen_R9_O15_PRE_OR_ECLAMPSIA	outcome	|| id:ebi-a-GCST90001812	Weighted median	9	-0.00933936	0.0418212	0.823289	-0.091309	0.0726302	0.990704	0.912736	1.07533
ebi-a-GCST90001812	gen_samplesize_1finngen_R9_O15_PRE_OR_ECLAMPSIA	outcome	|| id:ebi-a-GCST90001812	Weighted mode	9	-0.000652318	0.0468497	0.989232	-0.0924778	0.0911732	0.999348	0.911669	1.09546
ebi-a-GCST90001813	gen_samplesize_1finngen_R9_O15_PRE_OR_ECLAMPSIA	outcome	|| id:ebi-a-GCST90001813	Inverse variance weighted	15	0.0162819	0.0236792	0.491703	-0.0301294	0.0626932	1.01642	0.97032	1.0647
ebi-a-GCST90001813	gen_samplesize_1finngen_R9_O15_PRE_OR_ECLAMPSIA	outcome	|| id:ebi-a-GCST90001813	MR Egger	15	0.0251055	0.0342166	0.476143	-0.041959	0.09217	1.02542	0.958909	1.09655
ebi-a-GCST90001813	gen_samplesize_1finngen_R9_O15_PRE_OR_ECLAMPSIA	outcome	|| id:ebi-a-GCST90001813	Weighted median	15	0.00685743	0.0330888	0.83582	-0.0579966	0.0717115	1.00688	0.943653	1.07435
ebi-a-GCST90001813	gen_samplesize_1finngen_R9_O15_PRE_OR_ECLAMPSIA	outcome	|| id:ebi-a-GCST90001813	Weighted mode	15	0.00390643	0.0340836	0.910379	-0.0628974	0.0707102	1.00391	0.93904	1.07327
ebi-a-GCST90001814	gen_samplesize_1finngen_R9_O15_PRE_OR_ECLAMPSIA	outcome	|| id:ebi-a-GCST90001814	Inverse variance weighted	6	-0.0203607	0.0103179	0.0484564	-0.0405837	-0.00013768	0.979845	0.960229	0.999862
ebi-a-GCST90001814	gen_samplesize_1finngen_R9_O15_PRE_OR_ECLAMPSIA	outcome	|| id:ebi-a-GCST90001814	MR Egger	6	-0.0190259	0.0137646	0.23907	-0.0460046	0.00795277	0.981154	0.955038	1.00798
ebi-a-GCST90001814	gen_samplesize_1finngen_R9_O15_PRE_OR_ECLAMPSIA	outcome	|| id:ebi-a-GCST90001814	Weighted median	6	-0.0263622	0.0136902	0.0541516	-0.0531951	0.000470646	0.973982	0.948195	1.00047
ebi-a-GCST90001814	gen_samplesize_1finngen_R9_O15_PRE_OR_ECLAMPSIA	outcome	|| id:ebi-a-GCST90001814	Weighted mode	6	-0.0247205	0.0124585	0.104013	-0.0491391	-0.000301933	0.975583	0.952049	0.999698
ebi-a-GCST90001815	gen_samplesize_1finngen_R9_O15_PRE_OR_ECLAMPSIA	outcome	|| id:ebi-a-GCST90001815	Inverse variance weighted	12	0.015097	0.013626	0.267881	-0.0116099	0.0418039	1.01521	0.988457	1.04269
ebi-a-GCST90001815	gen_samplesize_1finngen_R9_O15_PRE_OR_ECLAMPSIA	outcome	|| id:ebi-a-GCST90001815	MR Egger	12	0.0118446	0.0168045	0.496993	-0.0210922	0.0447814	1.01192	0.979129	1.0458
ebi-a-GCST90001815	gen_samplesize_1finngen_R9_O15_PRE_OR_ECLAMPSIA	outcome	|| id:ebi-a-GCST90001815	Weighted median	12	0.0163634	0.0219051	0.455057	-0.0265707	0.0592975	1.0165	0.973779	1.06109
ebi-a-GCST90001815	gen_samplesize_1finngen_R9_O15_PRE_OR_ECLAMPSIA	outcome	|| id:ebi-a-GCST90001815	Weighted mode	12	0.0148765	0.0155074	0.358013	-0.0155181	0.045271	1.01499	0.984602	1.04631
ebi-a-GCST90001816	gen_samplesize_1finngen_R9_O15_PRE_OR_ECLAMPSIA	outcome	|| id:ebi-a-GCST90001816	Inverse variance weighted	15	-0.000920674	0.0234479	0.968679	-0.0468786	0.0450372	0.99908	0.954203	1.04607
ebi-a-GCST90001816	gen_samplesize_1finngen_R9_O15_PRE_OR_ECLAMPSIA	outcome	|| id:ebi-a-GCST90001816	MR Egger	15	-0.0218856	0.0318371	0.503896	-0.0842864	0.0405152	0.978352	0.919168	1.04135
ebi-a-GCST90001816	gen_samplesize_1finngen_R9_O15_PRE_OR_ECLAMPSIA	outcome	|| id:ebi-a-GCST90001816	Weighted median	15	-0.0157448	0.0344616	0.647758	-0.0832896	0.0518	0.984378	0.920085	1.05317
ebi-a-GCST90001816	gen_samplesize_1finngen_R9_O15_PRE_OR_ECLAMPSIA	outcome	|| id:ebi-a-GCST90001816	Weighted mode	15	-0.0214002	0.0342008	0.541564	-0.0884338	0.0456333	0.978827	0.915364	1.04669
ebi-a-GCST90001817	gen_samplesize_1finngen_R9_O15_PRE_OR_ECLAMPSIA	outcome	|| id:ebi-a-GCST90001817	Inverse variance weighted	7	-0.06256	0.0480401	0.192833	-0.156719	0.0315987	0.939357	0.854945	1.0321
ebi-a-GCST90001817	gen_samplesize_1finngen_R9_O15_PRE_OR_ECLAMPSIA	outcome	|| id:ebi-a-GCST90001817	MR Egger	7	-0.0131107	0.107521	0.907699	-0.223852	0.197631	0.986975	0.799433	1.21851
ebi-a-GCST90001817	gen_samplesize_1finngen_R9_O15_PRE_OR_ECLAMPSIA	outcome	|| id:ebi-a-GCST90001817	Weighted median	7	-0.0114188	0.0648443	0.860219	-0.138514	0.115676	0.988646	0.870651	1.12263
ebi-a-GCST90001817	gen_samplesize_1finngen_R9_O15_PRE_OR_ECLAMPSIA	outcome	|| id:ebi-a-GCST90001817	Weighted mode	7	-0.022718	0.0677583	0.748826	-0.155524	0.110088	0.977538	0.855966	1.11638
ebi-a-GCST90001818	gen_samplesize_1finngen_R9_O15_PRE_OR_ECLAMPSIA	outcome	|| id:ebi-a-GCST90001818	Inverse variance weighted	8	-0.0919756	0.061081	0.132119	-0.211694	0.0277432	0.912127	0.809212	1.02813
ebi-a-GCST90001818	gen_samplesize_1finngen_R9_O15_PRE_OR_ECLAMPSIA	outcome	|| id:ebi-a-GCST90001818	MR Egger	8	0.0191345	0.135395	0.89224	-0.246239	0.284508	1.01932	0.781735	1.32911
ebi-a-GCST90001818	gen_samplesize_1finngen_R9_O15_PRE_OR_ECLAMPSIA	outcome	|| id:ebi-a-GCST90001818	Weighted median	8	-0.131456	0.0877728	0.134215	-0.303491	0.0405787	0.876818	0.738237	1.04141
ebi-a-GCST90001818	gen_samplesize_1finngen_R9_O15_PRE_OR_ECLAMPSIA	outcome	|| id:ebi-a-GCST90001818	Weighted mode	8	-0.203335	0.120423	0.135169	-0.439364	0.0326951	0.816005	0.644446	1.03324
ebi-a-GCST90001819	gen_samplesize_1finngen_R9_O15_PRE_OR_ECLAMPSIA	outcome	|| id:ebi-a-GCST90001819	Inverse variance weighted	15	-0.0244629	0.0207083	0.23748	-0.0650512	0.0161254	0.975834	0.937019	1.01626
ebi-a-GCST90001819	gen_samplesize_1finngen_R9_O15_PRE_OR_ECLAMPSIA	outcome	|| id:ebi-a-GCST90001819	MR Egger	15	-0.0213739	0.0295524	0.482334	-0.0792966	0.0365487	0.978853	0.923766	1.03722
ebi-a-GCST90001819	gen_samplesize_1finngen_R9_O15_PRE_OR_ECLAMPSIA	outcome	|| id:ebi-a-GCST90001819	Weighted median	15	-0.0342946	0.0294229	0.243787	-0.0919634	0.0233743	0.966287	0.912138	1.02365
ebi-a-GCST90001819	gen_samplesize_1finngen_R9_O15_PRE_OR_ECLAMPSIA	outcome	|| id:ebi-a-GCST90001819	Weighted mode	15	-0.0360922	0.0279754	0.217905	-0.090924	0.0187396	0.964551	0.913087	1.01892
ebi-a-GCST90001820	gen_samplesize_1finngen_R9_O15_PRE_OR_ECLAMPSIA	outcome	|| id:ebi-a-GCST90001820	Inverse variance weighted (multiplicative random effects)	15	-0.0172179	0.0279641	0.538084	-0.0720275	0.0375918	0.98293	0.930505	1.03831
ebi-a-GCST90001820	gen_samplesize_1finngen_R9_O15_PRE_OR_ECLAMPSIA	outcome	|| id:ebi-a-GCST90001820	MR Egger	15	0.10269	0.0482491	0.0530103	0.00812188	0.197258	1.10815	1.00815	1.21806
ebi-a-GCST90001820	gen_samplesize_1finngen_R9_O15_PRE_OR_ECLAMPSIA	outcome	|| id:ebi-a-GCST90001820	Weighted median	15	0.0212102	0.0271482	0.434641	-0.0320003	0.0744207	1.02144	0.968506	1.07726
ebi-a-GCST90001820	gen_samplesize_1finngen_R9_O15_PRE_OR_ECLAMPSIA	outcome	|| id:ebi-a-GCST90001820	Weighted mode	15	0.0169171	0.0249508	0.508814	-0.0319866	0.0658207	1.01706	0.96852	1.06804
ebi-a-GCST90001821	gen_samplesize_1finngen_R9_O15_PRE_OR_ECLAMPSIA	outcome	|| id:ebi-a-GCST90001821	Inverse variance weighted	16	-0.000539294	0.0213087	0.979809	-0.0423044	0.0412258	0.999461	0.958578	1.04209
ebi-a-GCST90001821	gen_samplesize_1finngen_R9_O15_PRE_OR_ECLAMPSIA	outcome	|| id:ebi-a-GCST90001821	MR Egger	16	0.0263334	0.0373742	0.492622	-0.04692	0.0995869	1.02668	0.954164	1.10471
ebi-a-GCST90001821	gen_samplesize_1finngen_R9_O15_PRE_OR_ECLAMPSIA	outcome	|| id:ebi-a-GCST90001821	Weighted median	16	0.0133301	0.023726	0.574229	-0.0331729	0.0598331	1.01342	0.967371	1.06166
ebi-a-GCST90001821	gen_samplesize_1finngen_R9_O15_PRE_OR_ECLAMPSIA	outcome	|| id:ebi-a-GCST90001821	Weighted mode	16	0.015509	0.0238108	0.524681	-0.0311603	0.0621782	1.01563	0.96932	1.06415
ebi-a-GCST90001822	gen_samplesize_1finngen_R9_O15_PRE_OR_ECLAMPSIA	outcome	|| id:ebi-a-GCST90001822	Inverse variance weighted (multiplicative random effects)	13	-0.00185578	0.0281157	0.947374	-0.0569626	0.053251	0.998146	0.944629	1.05469
ebi-a-GCST90001822	gen_samplesize_1finngen_R9_O15_PRE_OR_ECLAMPSIA	outcome	|| id:ebi-a-GCST90001822	MR Egger	13	0.0385084	0.040247	0.359224	-0.0403757	0.117392	1.03926	0.960429	1.12456
ebi-a-GCST90001822	gen_samplesize_1finngen_R9_O15_PRE_OR_ECLAMPSIA	outcome	|| id:ebi-a-GCST90001822	Weighted median	13	0.0167689	0.0271128	0.536256	-0.0363723	0.06991	1.01691	0.964281	1.07241
ebi-a-GCST90001822	gen_samplesize_1finngen_R9_O15_PRE_OR_ECLAMPSIA	outcome	|| id:ebi-a-GCST90001822	Weighted mode	13	0.0132456	0.0234097	0.581945	-0.0326375	0.0591286	1.01333	0.967889	1.06091
ebi-a-GCST90001823	gen_samplesize_1finngen_R9_O15_PRE_OR_ECLAMPSIA	outcome	|| id:ebi-a-GCST90001823	Inverse variance weighted	8	0.00233535	0.0271606	0.93148	-0.0508995	0.0555702	1.00234	0.950374	1.05714
ebi-a-GCST90001823	gen_samplesize_1finngen_R9_O15_PRE_OR_ECLAMPSIA	outcome	|| id:ebi-a-GCST90001823	MR Egger	8	0.0171264	0.0636072	0.796755	-0.107544	0.141797	1.01727	0.898037	1.15234
ebi-a-GCST90001823	gen_samplesize_1finngen_R9_O15_PRE_OR_ECLAMPSIA	outcome	|| id:ebi-a-GCST90001823	Weighted median	8	0.0148897	0.0248627	0.549255	-0.0338412	0.0636207	1.015	0.966725	1.06569
ebi-a-GCST90001823	gen_samplesize_1finngen_R9_O15_PRE_OR_ECLAMPSIA	outcome	|| id:ebi-a-GCST90001823	Weighted mode	8	0.0129045	0.0236169	0.601756	-0.0333845	0.0591936	1.01299	0.967167	1.06098
ebi-a-GCST90001824	gen_samplesize_1finngen_R9_O15_PRE_OR_ECLAMPSIA	outcome	|| id:ebi-a-GCST90001824	Inverse variance weighted	16	0.0150541	0.0186937	0.420643	-0.0215855	0.0516938	1.01517	0.978646	1.05305
ebi-a-GCST90001824	gen_samplesize_1finngen_R9_O15_PRE_OR_ECLAMPSIA	outcome	|| id:ebi-a-GCST90001824	MR Egger	16	0.0032167	0.0347844	0.927631	-0.0649607	0.0713941	1.00322	0.937104	1.074
ebi-a-GCST90001824	gen_samplesize_1finngen_R9_O15_PRE_OR_ECLAMPSIA	outcome	|| id:ebi-a-GCST90001824	Weighted median	16	0.0208917	0.0233214	0.370351	-0.0248183	0.0666017	1.02111	0.975487	1.06887
ebi-a-GCST90001824	gen_samplesize_1finngen_R9_O15_PRE_OR_ECLAMPSIA	outcome	|| id:ebi-a-GCST90001824	Weighted mode	16	0.0234453	0.024211	0.348214	-0.0240083	0.0708989	1.02372	0.976278	1.07347
ebi-a-GCST90001825	gen_samplesize_1finngen_R9_O15_PRE_OR_ECLAMPSIA	outcome	|| id:ebi-a-GCST90001825	Inverse variance weighted	16	-0.00046372	0.015504	0.976139	-0.0308515	0.0299241	0.999536	0.96962	1.03038
ebi-a-GCST90001825	gen_samplesize_1finngen_R9_O15_PRE_OR_ECLAMPSIA	outcome	|| id:ebi-a-GCST90001825	MR Egger	16	0.0295917	0.0228829	0.216881	-0.0152588	0.0744423	1.03003	0.984857	1.07728
ebi-a-GCST90001825	gen_samplesize_1finngen_R9_O15_PRE_OR_ECLAMPSIA	outcome	|| id:ebi-a-GCST90001825	Weighted median	16	0.00946727	0.0208394	0.649615	-0.0313779	0.0503124	1.00951	0.969109	1.0516
ebi-a-GCST90001825	gen_samplesize_1finngen_R9_O15_PRE_OR_ECLAMPSIA	outcome	|| id:ebi-a-GCST90001825	Weighted mode	16	0.0118562	0.017895	0.517675	-0.0232179	0.0469303	1.01193	0.97705	1.04805
ebi-a-GCST90001826	gen_samplesize_1finngen_R9_O15_PRE_OR_ECLAMPSIA	outcome	|| id:ebi-a-GCST90001826	Inverse variance weighted	14	0.0175297	0.0236893	0.459309	-0.0289013	0.0639607	1.01768	0.971512	1.06605
ebi-a-GCST90001826	gen_samplesize_1finngen_R9_O15_PRE_OR_ECLAMPSIA	outcome	|| id:ebi-a-GCST90001826	MR Egger	14	0.0179911	0.0436972	0.687802	-0.0676555	0.103638	1.01815	0.934582	1.1092
ebi-a-GCST90001826	gen_samplesize_1finngen_R9_O15_PRE_OR_ECLAMPSIA	outcome	|| id:ebi-a-GCST90001826	Weighted median	14	0.0248667	0.0274645	0.365247	-0.0289637	0.078697	1.02518	0.971452	1.08188
ebi-a-GCST90001826	gen_samplesize_1finngen_R9_O15_PRE_OR_ECLAMPSIA	outcome	|| id:ebi-a-GCST90001826	Weighted mode	14	0.0202203	0.0291167	0.499618	-0.0368483	0.077289	1.02043	0.963822	1.08035
ebi-a-GCST90001827	gen_samplesize_1finngen_R9_O15_PRE_OR_ECLAMPSIA	outcome	|| id:ebi-a-GCST90001827	Inverse variance weighted	11	0.00520838	0.0248252	0.833822	-0.043449	0.0538657	1.00522	0.957481	1.05534
ebi-a-GCST90001827	gen_samplesize_1finngen_R9_O15_PRE_OR_ECLAMPSIA	outcome	|| id:ebi-a-GCST90001827	MR Egger	11	0.061864	0.0446105	0.198899	-0.0255727	0.149301	1.06382	0.974752	1.16102
ebi-a-GCST90001827	gen_samplesize_1finngen_R9_O15_PRE_OR_ECLAMPSIA	outcome	|| id:ebi-a-GCST90001827	Weighted median	11	0.0227655	0.0276262	0.409909	-0.0313819	0.0769129	1.02303	0.969105	1.07995
ebi-a-GCST90001827	gen_samplesize_1finngen_R9_O15_PRE_OR_ECLAMPSIA	outcome	|| id:ebi-a-GCST90001827	Weighted mode	11	0.0226332	0.0284396	0.444608	-0.0331084	0.0783749	1.02289	0.967434	1.08153
ebi-a-GCST90001828	gen_samplesize_1finngen_R9_O15_PRE_OR_ECLAMPSIA	outcome	|| id:ebi-a-GCST90001828	Inverse variance weighted	23	0.00565716	0.0202404	0.779862	-0.0340141	0.0453284	1.00567	0.966558	1.04637
ebi-a-GCST90001828	gen_samplesize_1finngen_R9_O15_PRE_OR_ECLAMPSIA	outcome	|| id:ebi-a-GCST90001828	MR Egger	23	0.0183034	0.0350044	0.606525	-0.0503052	0.0869121	1.01847	0.950939	1.0908
ebi-a-GCST90001828	gen_samplesize_1finngen_R9_O15_PRE_OR_ECLAMPSIA	outcome	|| id:ebi-a-GCST90001828	Weighted median	23	0.0244154	0.0277976	0.379765	-0.0300678	0.0788987	1.02472	0.97038	1.08209
ebi-a-GCST90001828	gen_samplesize_1finngen_R9_O15_PRE_OR_ECLAMPSIA	outcome	|| id:ebi-a-GCST90001828	Weighted mode	23	0.0200225	0.0276997	0.477393	-0.034269	0.0743139	1.02022	0.966312	1.07714
ebi-a-GCST90001829	gen_samplesize_1finngen_R9_O15_PRE_OR_ECLAMPSIA	outcome	|| id:ebi-a-GCST90001829	Inverse variance weighted	15	0.00536286	0.0187067	0.774356	-0.0313023	0.042028	1.00538	0.969183	1.04292
ebi-a-GCST90001829	gen_samplesize_1finngen_R9_O15_PRE_OR_ECLAMPSIA	outcome	|| id:ebi-a-GCST90001829	MR Egger	15	0.0436439	0.0205278	0.053227	0.0034095	0.0838784	1.04461	1.00342	1.0875
ebi-a-GCST90001829	gen_samplesize_1finngen_R9_O15_PRE_OR_ECLAMPSIA	outcome	|| id:ebi-a-GCST90001829	Weighted median	15	0.0270138	0.0189766	0.154581	-0.0101803	0.0642079	1.02738	0.989871	1.06631
ebi-a-GCST90001829	gen_samplesize_1finngen_R9_O15_PRE_OR_ECLAMPSIA	outcome	|| id:ebi-a-GCST90001829	Weighted mode	15	0.0340905	0.0177953	0.0760529	-0.000788203	0.0689692	1.03468	0.999212	1.0714
ebi-a-GCST90001830	gen_samplesize_1finngen_R9_O15_PRE_OR_ECLAMPSIA	outcome	|| id:ebi-a-GCST90001830	Inverse variance weighted (multiplicative random effects)	9	-0.016986	0.0395116	0.667268	-0.0944287	0.0604566	0.983157	0.909893	1.06232
ebi-a-GCST90001830	gen_samplesize_1finngen_R9_O15_PRE_OR_ECLAMPSIA	outcome	|| id:ebi-a-GCST90001830	MR Egger	9	-0.00123194	0.0612794	0.984522	-0.12134	0.118876	0.998769	0.885733	1.12623
ebi-a-GCST90001830	gen_samplesize_1finngen_R9_O15_PRE_OR_ECLAMPSIA	outcome	|| id:ebi-a-GCST90001830	Weighted median	9	-0.0318398	0.0368407	0.387447	-0.104047	0.0403679	0.968662	0.901183	1.04119
ebi-a-GCST90001830	gen_samplesize_1finngen_R9_O15_PRE_OR_ECLAMPSIA	outcome	|| id:ebi-a-GCST90001830	Weighted mode	9	-0.0395504	0.0388237	0.338152	-0.115645	0.036544	0.961222	0.890792	1.03722
ebi-a-GCST90001831	gen_samplesize_1finngen_R9_O15_PRE_OR_ECLAMPSIA	outcome	|| id:ebi-a-GCST90001831	Inverse variance weighted	9	0.0357045	0.0394298	0.36519	-0.041578	0.112987	1.03635	0.959275	1.11962
ebi-a-GCST90001831	gen_samplesize_1finngen_R9_O15_PRE_OR_ECLAMPSIA	outcome	|| id:ebi-a-GCST90001831	MR Egger	9	-0.125576	0.107766	0.282077	-0.336796	0.0856446	0.881989	0.714054	1.08942
ebi-a-GCST90001831	gen_samplesize_1finngen_R9_O15_PRE_OR_ECLAMPSIA	outcome	|| id:ebi-a-GCST90001831	Weighted median	9	0.0225339	0.0473277	0.633986	-0.0702284	0.115296	1.02279	0.932181	1.12221
ebi-a-GCST90001831	gen_samplesize_1finngen_R9_O15_PRE_OR_ECLAMPSIA	outcome	|| id:ebi-a-GCST90001831	Weighted mode	9	0.0243421	0.0575361	0.683385	-0.0884288	0.137113	1.02464	0.915368	1.14696
ebi-a-GCST90001832	gen_samplesize_1finngen_R9_O15_PRE_OR_ECLAMPSIA	outcome	|| id:ebi-a-GCST90001832	Inverse variance weighted	10	-0.0384473	0.0295671	0.193484	-0.0963987	0.0195042	0.962282	0.908102	1.0197
ebi-a-GCST90001832	gen_samplesize_1finngen_R9_O15_PRE_OR_ECLAMPSIA	outcome	|| id:ebi-a-GCST90001832	MR Egger	10	-0.0513096	0.0527809	0.359461	-0.15476	0.052141	0.949985	0.856621	1.05352
ebi-a-GCST90001832	gen_samplesize_1finngen_R9_O15_PRE_OR_ECLAMPSIA	outcome	|| id:ebi-a-GCST90001832	Weighted median	10	-0.0433995	0.0362287	0.230944	-0.114408	0.0276088	0.957529	0.891894	1.02799
ebi-a-GCST90001832	gen_samplesize_1finngen_R9_O15_PRE_OR_ECLAMPSIA	outcome	|| id:ebi-a-GCST90001832	Weighted mode	10	-0.0497229	0.0422904	0.269859	-0.132612	0.0331663	0.951493	0.875805	1.03372
ebi-a-GCST90001833	gen_samplesize_1finngen_R9_O15_PRE_OR_ECLAMPSIA	outcome	|| id:ebi-a-GCST90001833	Inverse variance weighted	17	-0.0398786	0.0239579	0.0960073	-0.0868362	0.00707894	0.960906	0.916827	1.0071
ebi-a-GCST90001833	gen_samplesize_1finngen_R9_O15_PRE_OR_ECLAMPSIA	outcome	|| id:ebi-a-GCST90001833	MR Egger	17	-0.0817054	0.0432318	0.0782494	-0.16644	0.00302896	0.921543	0.846674	1.00303
ebi-a-GCST90001833	gen_samplesize_1finngen_R9_O15_PRE_OR_ECLAMPSIA	outcome	|| id:ebi-a-GCST90001833	Weighted median	17	-0.054588	0.0342076	0.110537	-0.121635	0.012459	0.946875	0.885472	1.01254
ebi-a-GCST90001833	gen_samplesize_1finngen_R9_O15_PRE_OR_ECLAMPSIA	outcome	|| id:ebi-a-GCST90001833	Weighted mode	17	-0.0690274	0.0377473	0.086151	-0.143012	0.00495719	0.933301	0.866744	1.00497
ebi-a-GCST90001834	gen_samplesize_1finngen_R9_O15_PRE_OR_ECLAMPSIA	outcome	|| id:ebi-a-GCST90001834	Inverse variance weighted	12	0.0345894	0.0299331	0.247862	-0.0240794	0.0932582	1.03519	0.976208	1.09775
ebi-a-GCST90001834	gen_samplesize_1finngen_R9_O15_PRE_OR_ECLAMPSIA	outcome	|| id:ebi-a-GCST90001834	MR Egger	12	0.0802308	0.0613563	0.220265	-0.0400275	0.200489	1.08354	0.960763	1.222
ebi-a-GCST90001834	gen_samplesize_1finngen_R9_O15_PRE_OR_ECLAMPSIA	outcome	|| id:ebi-a-GCST90001834	Weighted median	12	0.0413267	0.0366891	0.259995	-0.0305839	0.113237	1.04219	0.969879	1.1199
ebi-a-GCST90001834	gen_samplesize_1finngen_R9_O15_PRE_OR_ECLAMPSIA	outcome	|| id:ebi-a-GCST90001834	Weighted mode	12	0.0358351	0.036114	0.342388	-0.0349483	0.106618	1.03648	0.965655	1.11251
ebi-a-GCST90001835	gen_samplesize_1finngen_R9_O15_PRE_OR_ECLAMPSIA	outcome	|| id:ebi-a-GCST90001835	Inverse variance weighted	9	0.00197967	0.0429901	0.963271	-0.0822809	0.0862402	1.00198	0.921013	1.09007
ebi-a-GCST90001835	gen_samplesize_1finngen_R9_O15_PRE_OR_ECLAMPSIA	outcome	|| id:ebi-a-GCST90001835	MR Egger	9	-0.0790986	0.0618812	0.241916	-0.200386	0.0421884	0.923949	0.818415	1.04309
ebi-a-GCST90001835	gen_samplesize_1finngen_R9_O15_PRE_OR_ECLAMPSIA	outcome	|| id:ebi-a-GCST90001835	Weighted median	9	-0.0396322	0.0509452	0.436605	-0.139485	0.0602203	0.961143	0.869806	1.06207
ebi-a-GCST90001835	gen_samplesize_1finngen_R9_O15_PRE_OR_ECLAMPSIA	outcome	|| id:ebi-a-GCST90001835	Weighted mode	9	-0.0540219	0.0537372	0.344188	-0.159347	0.051303	0.947411	0.852701	1.05264
ebi-a-GCST90001836	gen_samplesize_1finngen_R9_O15_PRE_OR_ECLAMPSIA	outcome	|| id:ebi-a-GCST90001836	Inverse variance weighted	16	0.0466547	0.0178964	0.00913555	0.0115779	0.0817316	1.04776	1.01165	1.08516
ebi-a-GCST90001836	gen_samplesize_1finngen_R9_O15_PRE_OR_ECLAMPSIA	outcome	|| id:ebi-a-GCST90001836	MR Egger	16	0.0116511	0.0261655	0.662923	-0.0396333	0.0629355	1.01172	0.961142	1.06496
ebi-a-GCST90001836	gen_samplesize_1finngen_R9_O15_PRE_OR_ECLAMPSIA	outcome	|| id:ebi-a-GCST90001836	Weighted median	16	0.0299477	0.0238104	0.208479	-0.0167206	0.076616	1.0304	0.983418	1.07963
ebi-a-GCST90001836	gen_samplesize_1finngen_R9_O15_PRE_OR_ECLAMPSIA	outcome	|| id:ebi-a-GCST90001836	Weighted mode	16	0.0266335	0.0229032	0.263047	-0.0182567	0.0715237	1.02699	0.981909	1.07414
ebi-a-GCST90001837	gen_samplesize_1finngen_R9_O15_PRE_OR_ECLAMPSIA	outcome	|| id:ebi-a-GCST90001837	Inverse variance weighted	11	0.0466063	0.0271381	0.0859107	-0.00658439	0.099797	1.04771	0.993437	1.10495
ebi-a-GCST90001837	gen_samplesize_1finngen_R9_O15_PRE_OR_ECLAMPSIA	outcome	|| id:ebi-a-GCST90001837	MR Egger	11	0.00224237	0.0685362	0.974614	-0.132089	0.136573	1.00224	0.876263	1.14634
ebi-a-GCST90001837	gen_samplesize_1finngen_R9_O15_PRE_OR_ECLAMPSIA	outcome	|| id:ebi-a-GCST90001837	Weighted median	11	0.0323118	0.0325177	0.320385	-0.031423	0.0960465	1.03284	0.969066	1.10081
ebi-a-GCST90001837	gen_samplesize_1finngen_R9_O15_PRE_OR_ECLAMPSIA	outcome	|| id:ebi-a-GCST90001837	Weighted mode	11	0.0203016	0.0407146	0.628823	-0.0594991	0.100102	1.02051	0.942236	1.10528
ebi-a-GCST90001838	gen_samplesize_1finngen_R9_O15_PRE_OR_ECLAMPSIA	outcome	|| id:ebi-a-GCST90001838	Inverse variance weighted	19	-0.012628	0.0194041	0.515182	-0.0506599	0.025404	0.987451	0.950602	1.02573
ebi-a-GCST90001838	gen_samplesize_1finngen_R9_O15_PRE_OR_ECLAMPSIA	outcome	|| id:ebi-a-GCST90001838	MR Egger	19	-0.0132902	0.0353356	0.711485	-0.082548	0.0559676	0.986798	0.920767	1.05756
ebi-a-GCST90001838	gen_samplesize_1finngen_R9_O15_PRE_OR_ECLAMPSIA	outcome	|| id:ebi-a-GCST90001838	Weighted median	19	-0.010223	0.0279746	0.714785	-0.0650532	0.0446073	0.989829	0.937018	1.04562
ebi-a-GCST90001838	gen_samplesize_1finngen_R9_O15_PRE_OR_ECLAMPSIA	outcome	|| id:ebi-a-GCST90001838	Weighted mode	19	-0.0389453	0.0303279	0.215376	-0.098388	0.0204974	0.961803	0.906297	1.02071
ebi-a-GCST90001839	gen_samplesize_1finngen_R9_O15_PRE_OR_ECLAMPSIA	outcome	|| id:ebi-a-GCST90001839	Inverse variance weighted (multiplicative random effects)	9	-0.0844708	0.0537218	0.115863	-0.189766	0.0208239	0.918998	0.827153	1.02104
ebi-a-GCST90001839	gen_samplesize_1finngen_R9_O15_PRE_OR_ECLAMPSIA	outcome	|| id:ebi-a-GCST90001839	MR Egger	9	-0.278642	0.0888265	0.0164498	-0.452742	-0.104542	0.756811	0.635882	0.900737
ebi-a-GCST90001839	gen_samplesize_1finngen_R9_O15_PRE_OR_ECLAMPSIA	outcome	|| id:ebi-a-GCST90001839	Weighted median	9	-0.117791	0.048262	0.0146605	-0.212385	-0.0231976	0.888882	0.808654	0.977069
ebi-a-GCST90001839	gen_samplesize_1finngen_R9_O15_PRE_OR_ECLAMPSIA	outcome	|| id:ebi-a-GCST90001839	Weighted mode	9	-0.128582	0.0501106	0.0333361	-0.226799	-0.0303653	0.879341	0.797081	0.970091
ebi-a-GCST90001840	gen_samplesize_1finngen_R9_O15_PRE_OR_ECLAMPSIA	outcome	|| id:ebi-a-GCST90001840	Inverse variance weighted	12	-0.02602	0.0349918	0.457118	-0.0946039	0.042564	0.974316	0.909733	1.04348
ebi-a-GCST90001840	gen_samplesize_1finngen_R9_O15_PRE_OR_ECLAMPSIA	outcome	|| id:ebi-a-GCST90001840	MR Egger	12	-0.0277541	0.0795077	0.734273	-0.183589	0.128081	0.972628	0.832278	1.13665
ebi-a-GCST90001840	gen_samplesize_1finngen_R9_O15_PRE_OR_ECLAMPSIA	outcome	|| id:ebi-a-GCST90001840	Weighted median	12	-0.00712003	0.0435086	0.87001	-0.092397	0.0781569	0.992905	0.911743	1.08129
ebi-a-GCST90001840	gen_samplesize_1finngen_R9_O15_PRE_OR_ECLAMPSIA	outcome	|| id:ebi-a-GCST90001840	Weighted mode	12	-0.0105085	0.0491422	0.834585	-0.106827	0.0858102	0.989547	0.898681	1.0896
ebi-a-GCST90001841	gen_samplesize_1finngen_R9_O15_PRE_OR_ECLAMPSIA	outcome	|| id:ebi-a-GCST90001841	Inverse variance weighted	14	-0.0258462	0.019224	0.178794	-0.0635252	0.0118328	0.974485	0.93845	1.0119
ebi-a-GCST90001841	gen_samplesize_1finngen_R9_O15_PRE_OR_ECLAMPSIA	outcome	|| id:ebi-a-GCST90001841	MR Egger	14	-0.0696483	0.0241816	0.0138248	-0.117044	-0.0222525	0.932722	0.889546	0.977993
ebi-a-GCST90001841	gen_samplesize_1finngen_R9_O15_PRE_OR_ECLAMPSIA	outcome	|| id:ebi-a-GCST90001841	Weighted median	14	-0.0378186	0.0228908	0.0985079	-0.0826845	0.00704737	0.962888	0.920642	1.00707
ebi-a-GCST90001841	gen_samplesize_1finngen_R9_O15_PRE_OR_ECLAMPSIA	outcome	|| id:ebi-a-GCST90001841	Weighted mode	14	-0.0406653	0.0198456	0.0611983	-0.0795627	-0.00176781	0.96015	0.92352	0.998234
ebi-a-GCST90001842	gen_samplesize_1finngen_R9_O15_PRE_OR_ECLAMPSIA	outcome	|| id:ebi-a-GCST90001842	Inverse variance weighted	20	-0.0205071	0.0183942	0.264908	-0.0565597	0.0155456	0.979702	0.94501	1.01567
ebi-a-GCST90001842	gen_samplesize_1finngen_R9_O15_PRE_OR_ECLAMPSIA	outcome	|| id:ebi-a-GCST90001842	MR Egger	20	-0.0619501	0.0252665	0.0246482	-0.111472	-0.0124278	0.93993	0.894516	0.987649
ebi-a-GCST90001842	gen_samplesize_1finngen_R9_O15_PRE_OR_ECLAMPSIA	outcome	|| id:ebi-a-GCST90001842	Weighted median	20	-0.0257598	0.0239928	0.282982	-0.0727857	0.0212662	0.974569	0.9298	1.02149
ebi-a-GCST90001842	gen_samplesize_1finngen_R9_O15_PRE_OR_ECLAMPSIA	outcome	|| id:ebi-a-GCST90001842	Weighted mode	20	-0.0387731	0.0232219	0.111376	-0.0842879	0.00674171	0.961969	0.919167	1.00676
ebi-a-GCST90001843	gen_samplesize_1finngen_R9_O15_PRE_OR_ECLAMPSIA	outcome	|| id:ebi-a-GCST90001843	Inverse variance weighted	15	0.00657864	0.0196603	0.737915	-0.0319556	0.0451128	1.0066	0.96855	1.04615
ebi-a-GCST90001843	gen_samplesize_1finngen_R9_O15_PRE_OR_ECLAMPSIA	outcome	|| id:ebi-a-GCST90001843	MR Egger	15	0.00749199	0.030978	0.812671	-0.0532249	0.0682089	1.00752	0.948167	1.07059
ebi-a-GCST90001843	gen_samplesize_1finngen_R9_O15_PRE_OR_ECLAMPSIA	outcome	|| id:ebi-a-GCST90001843	Weighted median	15	0.0402785	0.0300107	0.179551	-0.0185424	0.0990995	1.0411	0.981628	1.10418
ebi-a-GCST90001843	gen_samplesize_1finngen_R9_O15_PRE_OR_ECLAMPSIA	outcome	|| id:ebi-a-GCST90001843	Weighted mode	15	0.0335298	0.0352923	0.358196	-0.0356431	0.102703	1.0341	0.964985	1.10816
ebi-a-GCST90001844	gen_samplesize_1finngen_R9_O15_PRE_OR_ECLAMPSIA	outcome	|| id:ebi-a-GCST90001844	Inverse variance weighted	11	-0.0295349	0.0246558	0.230959	-0.0778602	0.0187904	0.970897	0.925094	1.01897
ebi-a-GCST90001844	gen_samplesize_1finngen_R9_O15_PRE_OR_ECLAMPSIA	outcome	|| id:ebi-a-GCST90001844	MR Egger	11	-0.0289223	0.0362861	0.445932	-0.100043	0.0421985	0.971492	0.904798	1.0431
ebi-a-GCST90001844	gen_samplesize_1finngen_R9_O15_PRE_OR_ECLAMPSIA	outcome	|| id:ebi-a-GCST90001844	Weighted median	11	-0.0375934	0.0363641	0.301227	-0.108867	0.0336802	0.963104	0.89685	1.03425
ebi-a-GCST90001844	gen_samplesize_1finngen_R9_O15_PRE_OR_ECLAMPSIA	outcome	|| id:ebi-a-GCST90001844	Weighted mode	11	-0.0328141	0.0364257	0.388849	-0.104208	0.0385804	0.967718	0.901037	1.03933
ebi-a-GCST90001845	gen_samplesize_1finngen_R9_O15_PRE_OR_ECLAMPSIA	outcome	|| id:ebi-a-GCST90001845	Inverse variance weighted	16	0.0140971	0.0299674	0.638058	-0.044639	0.0728333	1.0142	0.956343	1.07555
ebi-a-GCST90001845	gen_samplesize_1finngen_R9_O15_PRE_OR_ECLAMPSIA	outcome	|| id:ebi-a-GCST90001845	MR Egger	16	-0.12553	0.0486395	0.0217748	-0.220863	-0.0301962	0.88203	0.801826	0.970255
ebi-a-GCST90001845	gen_samplesize_1finngen_R9_O15_PRE_OR_ECLAMPSIA	outcome	|| id:ebi-a-GCST90001845	Weighted median	16	-0.0101925	0.0350306	0.771082	-0.0788524	0.0584674	0.989859	0.924176	1.06021
ebi-a-GCST90001845	gen_samplesize_1finngen_R9_O15_PRE_OR_ECLAMPSIA	outcome	|| id:ebi-a-GCST90001845	Weighted mode	16	-0.0458387	0.032027	0.172862	-0.108612	0.0169342	0.955196	0.897079	1.01708
ebi-a-GCST90001846	gen_samplesize_1finngen_R9_O15_PRE_OR_ECLAMPSIA	outcome	|| id:ebi-a-GCST90001846	Inverse variance weighted	9	-0.0724777	0.0330553	0.028335	-0.137266	-0.00768924	0.930087	0.871738	0.99234
ebi-a-GCST90001846	gen_samplesize_1finngen_R9_O15_PRE_OR_ECLAMPSIA	outcome	|| id:ebi-a-GCST90001846	MR Egger	9	-0.0985487	0.0654415	0.175813	-0.226814	0.0297167	0.906152	0.797069	1.03016
ebi-a-GCST90001846	gen_samplesize_1finngen_R9_O15_PRE_OR_ECLAMPSIA	outcome	|| id:ebi-a-GCST90001846	Weighted median	9	-0.0768839	0.0415541	0.0642833	-0.15833	0.00456224	0.925997	0.853568	1.00457
ebi-a-GCST90001846	gen_samplesize_1finngen_R9_O15_PRE_OR_ECLAMPSIA	outcome	|| id:ebi-a-GCST90001846	Weighted mode	9	-0.0810716	0.0429777	0.095961	-0.165308	0.0031646	0.922128	0.847633	1.00317
ebi-a-GCST90001847	gen_samplesize_1finngen_R9_O15_PRE_OR_ECLAMPSIA	outcome	|| id:ebi-a-GCST90001847	Inverse variance weighted	16	0.00167382	0.0269009	0.950386	-0.051052	0.0543996	1.00168	0.950229	1.05591
ebi-a-GCST90001847	gen_samplesize_1finngen_R9_O15_PRE_OR_ECLAMPSIA	outcome	|| id:ebi-a-GCST90001847	MR Egger	16	0.00224315	0.0484516	0.963728	-0.092722	0.0972083	1.00225	0.911447	1.10209
ebi-a-GCST90001847	gen_samplesize_1finngen_R9_O15_PRE_OR_ECLAMPSIA	outcome	|| id:ebi-a-GCST90001847	Weighted median	16	0.0065577	0.0406957	0.871983	-0.0732058	0.0863212	1.00658	0.929409	1.09016
ebi-a-GCST90001847	gen_samplesize_1finngen_R9_O15_PRE_OR_ECLAMPSIA	outcome	|| id:ebi-a-GCST90001847	Weighted mode	16	-0.00541173	0.0461486	0.908204	-0.095863	0.0850395	0.994603	0.908589	1.08876
ebi-a-GCST90001848	gen_samplesize_1finngen_R9_O15_PRE_OR_ECLAMPSIA	outcome	|| id:ebi-a-GCST90001848	Inverse variance weighted	10	-0.0165061	0.0417661	0.692694	-0.0983677	0.0653555	0.983629	0.906316	1.06754
ebi-a-GCST90001848	gen_samplesize_1finngen_R9_O15_PRE_OR_ECLAMPSIA	outcome	|| id:ebi-a-GCST90001848	MR Egger	10	0.043455	0.0767046	0.586575	-0.106886	0.193796	1.04441	0.898628	1.21385
ebi-a-GCST90001848	gen_samplesize_1finngen_R9_O15_PRE_OR_ECLAMPSIA	outcome	|| id:ebi-a-GCST90001848	Weighted median	10	0.038817	0.0575489	0.49999	-0.0739788	0.151613	1.03958	0.928691	1.16371
ebi-a-GCST90001848	gen_samplesize_1finngen_R9_O15_PRE_OR_ECLAMPSIA	outcome	|| id:ebi-a-GCST90001848	Weighted mode	10	0.0559017	0.0669937	0.425631	-0.0754059	0.187209	1.05749	0.927367	1.20588
ebi-a-GCST90001849	gen_samplesize_1finngen_R9_O15_PRE_OR_ECLAMPSIA	outcome	|| id:ebi-a-GCST90001849	Inverse variance weighted	18	-0.0272243	0.0250603	0.277323	-0.0763426	0.0218939	0.973143	0.926499	1.02214
ebi-a-GCST90001849	gen_samplesize_1finngen_R9_O15_PRE_OR_ECLAMPSIA	outcome	|| id:ebi-a-GCST90001849	MR Egger	18	0.033996	0.0440822	0.451831	-0.0524051	0.120397	1.03458	0.948944	1.12794
ebi-a-GCST90001849	gen_samplesize_1finngen_R9_O15_PRE_OR_ECLAMPSIA	outcome	|| id:ebi-a-GCST90001849	Weighted median	18	-0.00215175	0.0342216	0.949865	-0.0692261	0.0649226	0.997851	0.933116	1.06708
ebi-a-GCST90001849	gen_samplesize_1finngen_R9_O15_PRE_OR_ECLAMPSIA	outcome	|| id:ebi-a-GCST90001849	Weighted mode	18	0.0166778	0.0494955	0.740274	-0.0803333	0.113689	1.01682	0.922809	1.1204
ebi-a-GCST90001850	gen_samplesize_1finngen_R9_O15_PRE_OR_ECLAMPSIA	outcome	|| id:ebi-a-GCST90001850	Inverse variance weighted	12	-0.0205356	0.0328181	0.531485	-0.084859	0.0437878	0.979674	0.918642	1.04476
ebi-a-GCST90001850	gen_samplesize_1finngen_R9_O15_PRE_OR_ECLAMPSIA	outcome	|| id:ebi-a-GCST90001850	MR Egger	12	-0.0437781	0.0748716	0.571699	-0.190526	0.10297	0.957166	0.826524	1.10846
ebi-a-GCST90001850	gen_samplesize_1finngen_R9_O15_PRE_OR_ECLAMPSIA	outcome	|| id:ebi-a-GCST90001850	Weighted median	12	-0.00945383	0.0466613	0.839444	-0.10091	0.0820024	0.990591	0.904014	1.08546
ebi-a-GCST90001850	gen_samplesize_1finngen_R9_O15_PRE_OR_ECLAMPSIA	outcome	|| id:ebi-a-GCST90001850	Weighted mode	12	-0.0248835	0.0573376	0.67269	-0.137265	0.0874982	0.975424	0.871739	1.09144
ebi-a-GCST90001851	gen_samplesize_1finngen_R9_O15_PRE_OR_ECLAMPSIA	outcome	|| id:ebi-a-GCST90001851	Inverse variance weighted	21	-0.00338636	0.0165433	0.837809	-0.0358112	0.0290385	0.996619	0.964822	1.02946
ebi-a-GCST90001851	gen_samplesize_1finngen_R9_O15_PRE_OR_ECLAMPSIA	outcome	|| id:ebi-a-GCST90001851	MR Egger	21	0.0176503	0.0240072	0.47119	-0.0294038	0.0647044	1.01781	0.971024	1.06684
ebi-a-GCST90001851	gen_samplesize_1finngen_R9_O15_PRE_OR_ECLAMPSIA	outcome	|| id:ebi-a-GCST90001851	Weighted median	21	0.0195119	0.0247996	0.431411	-0.0290954	0.0681191	1.0197	0.971324	1.07049
ebi-a-GCST90001851	gen_samplesize_1finngen_R9_O15_PRE_OR_ECLAMPSIA	outcome	|| id:ebi-a-GCST90001851	Weighted mode	21	0.0141175	0.0248283	0.575954	-0.034546	0.0627809	1.01422	0.966044	1.06479
ebi-a-GCST90001852	gen_samplesize_1finngen_R9_O15_PRE_OR_ECLAMPSIA	outcome	|| id:ebi-a-GCST90001852	Inverse variance weighted	9	-0.0384245	0.0288562	0.182996	-0.0949826	0.0181336	0.962304	0.909389	1.0183
ebi-a-GCST90001852	gen_samplesize_1finngen_R9_O15_PRE_OR_ECLAMPSIA	outcome	|| id:ebi-a-GCST90001852	MR Egger	9	-0.0172377	0.049681	0.738812	-0.114612	0.080137	0.98291	0.891712	1.08344
ebi-a-GCST90001852	gen_samplesize_1finngen_R9_O15_PRE_OR_ECLAMPSIA	outcome	|| id:ebi-a-GCST90001852	Weighted median	9	-0.0316153	0.0374356	0.398376	-0.104989	0.0417585	0.968879	0.900334	1.04264
ebi-a-GCST90001852	gen_samplesize_1finngen_R9_O15_PRE_OR_ECLAMPSIA	outcome	|| id:ebi-a-GCST90001852	Weighted mode	9	-0.0308062	0.0452172	0.514919	-0.119432	0.0578195	0.969663	0.887424	1.05952
ebi-a-GCST90001853	gen_samplesize_1finngen_R9_O15_PRE_OR_ECLAMPSIA	outcome	|| id:ebi-a-GCST90001853	Inverse variance weighted	11	-0.0542885	0.0218883	0.0131289	-0.0971895	-0.0113875	0.947159	0.907384	0.988677
ebi-a-GCST90001853	gen_samplesize_1finngen_R9_O15_PRE_OR_ECLAMPSIA	outcome	|| id:ebi-a-GCST90001853	MR Egger	11	-0.032644	0.0453105	0.489536	-0.121453	0.0561646	0.967883	0.885633	1.05777
ebi-a-GCST90001853	gen_samplesize_1finngen_R9_O15_PRE_OR_ECLAMPSIA	outcome	|| id:ebi-a-GCST90001853	Weighted median	11	-0.0644732	0.0274313	0.0187557	-0.118239	-0.0107078	0.937561	0.888484	0.989349
ebi-a-GCST90001853	gen_samplesize_1finngen_R9_O15_PRE_OR_ECLAMPSIA	outcome	|| id:ebi-a-GCST90001853	Weighted mode	11	-0.0616906	0.0282873	0.054167	-0.117134	-0.00624745	0.940174	0.889466	0.993772
ebi-a-GCST90001854	gen_samplesize_1finngen_R9_O15_PRE_OR_ECLAMPSIA	outcome	|| id:ebi-a-GCST90001854	Inverse variance weighted	14	-0.0392506	0.019899	0.0485539	-0.0782526	-0.000248495	0.96151	0.924731	0.999752
ebi-a-GCST90001854	gen_samplesize_1finngen_R9_O15_PRE_OR_ECLAMPSIA	outcome	|| id:ebi-a-GCST90001854	MR Egger	14	-0.0351847	0.0368354	0.358331	-0.107382	0.0370128	0.965427	0.898182	1.03771
ebi-a-GCST90001854	gen_samplesize_1finngen_R9_O15_PRE_OR_ECLAMPSIA	outcome	|| id:ebi-a-GCST90001854	Weighted median	14	-0.0465469	0.0274984	0.0905099	-0.100444	0.00734993	0.95452	0.904436	1.00738
ebi-a-GCST90001854	gen_samplesize_1finngen_R9_O15_PRE_OR_ECLAMPSIA	outcome	|| id:ebi-a-GCST90001854	Weighted mode	14	-0.0471824	0.0298517	0.137994	-0.105692	0.0113269	0.953913	0.899702	1.01139
ebi-a-GCST90001855	gen_samplesize_1finngen_R9_O15_PRE_OR_ECLAMPSIA	outcome	|| id:ebi-a-GCST90001855	Inverse variance weighted	13	-0.0424499	0.0199024	0.0329328	-0.0814587	-0.00344115	0.958438	0.921771	0.996565
ebi-a-GCST90001855	gen_samplesize_1finngen_R9_O15_PRE_OR_ECLAMPSIA	outcome	|| id:ebi-a-GCST90001855	MR Egger	13	-0.0323988	0.0345137	0.368029	-0.100046	0.0352481	0.96812	0.904796	1.03588
ebi-a-GCST90001855	gen_samplesize_1finngen_R9_O15_PRE_OR_ECLAMPSIA	outcome	|| id:ebi-a-GCST90001855	Weighted median	13	-0.0335119	0.0257858	0.19373	-0.0840521	0.0170284	0.967043	0.919383	1.01717
ebi-a-GCST90001855	gen_samplesize_1finngen_R9_O15_PRE_OR_ECLAMPSIA	outcome	|| id:ebi-a-GCST90001855	Weighted mode	13	-0.0385217	0.0267462	0.175369	-0.0909444	0.0139009	0.962211	0.913069	1.014
ebi-a-GCST90001856	gen_samplesize_1finngen_R9_O15_PRE_OR_ECLAMPSIA	outcome	|| id:ebi-a-GCST90001856	Inverse variance weighted	16	-0.0488851	0.0208299	0.018932	-0.0897118	-0.00805843	0.952291	0.914195	0.991974
ebi-a-GCST90001856	gen_samplesize_1finngen_R9_O15_PRE_OR_ECLAMPSIA	outcome	|| id:ebi-a-GCST90001856	MR Egger	16	-0.00530379	0.034407	0.879693	-0.0727414	0.0621339	0.99471	0.929841	1.0641
ebi-a-GCST90001856	gen_samplesize_1finngen_R9_O15_PRE_OR_ECLAMPSIA	outcome	|| id:ebi-a-GCST90001856	Weighted median	16	-0.0688635	0.0289825	0.0174997	-0.125669	-0.0120578	0.933454	0.881906	0.988015
ebi-a-GCST90001856	gen_samplesize_1finngen_R9_O15_PRE_OR_ECLAMPSIA	outcome	|| id:ebi-a-GCST90001856	Weighted mode	16	-0.0645219	0.0291119	0.0425462	-0.121581	-0.00746262	0.937516	0.885519	0.992565
ebi-a-GCST90001857	gen_samplesize_1finngen_R9_O15_PRE_OR_ECLAMPSIA	outcome	|| id:ebi-a-GCST90001857	Inverse variance weighted	12	-0.0482198	0.021624	0.0257531	-0.0906029	-0.00583666	0.952924	0.91338	0.99418
ebi-a-GCST90001857	gen_samplesize_1finngen_R9_O15_PRE_OR_ECLAMPSIA	outcome	|| id:ebi-a-GCST90001857	MR Egger	12	-0.0545764	0.0386229	0.188	-0.130277	0.0211245	0.946886	0.877852	1.02135
ebi-a-GCST90001857	gen_samplesize_1finngen_R9_O15_PRE_OR_ECLAMPSIA	outcome	|| id:ebi-a-GCST90001857	Weighted median	12	-0.0541113	0.0283049	0.0559107	-0.109589	0.00136625	0.947327	0.896203	1.00137
ebi-a-GCST90001857	gen_samplesize_1finngen_R9_O15_PRE_OR_ECLAMPSIA	outcome	|| id:ebi-a-GCST90001857	Weighted mode	12	-0.0564499	0.028823	0.0760086	-0.112943	4.32449e-05	0.945114	0.893202	1.00004
ebi-a-GCST90001858	gen_samplesize_1finngen_R9_O15_PRE_OR_ECLAMPSIA	outcome	|| id:ebi-a-GCST90001858	Inverse variance weighted	18	-0.0158117	0.0213367	0.458659	-0.0576317	0.0260083	0.984313	0.943998	1.02635
ebi-a-GCST90001858	gen_samplesize_1finngen_R9_O15_PRE_OR_ECLAMPSIA	outcome	|| id:ebi-a-GCST90001858	MR Egger	18	-0.0613616	0.0303494	0.0602452	-0.120846	-0.00187673	0.940483	0.88617	0.998125
ebi-a-GCST90001858	gen_samplesize_1finngen_R9_O15_PRE_OR_ECLAMPSIA	outcome	|| id:ebi-a-GCST90001858	Weighted median	18	-0.00579142	0.0261419	0.824674	-0.0570295	0.0454467	0.994225	0.944566	1.0465
ebi-a-GCST90001858	gen_samplesize_1finngen_R9_O15_PRE_OR_ECLAMPSIA	outcome	|| id:ebi-a-GCST90001858	Weighted mode	18	-0.0329613	0.0225826	0.162635	-0.0772232	0.0113006	0.967576	0.925683	1.01136
ebi-a-GCST90001859	gen_samplesize_1finngen_R9_O15_PRE_OR_ECLAMPSIA	outcome	|| id:ebi-a-GCST90001859	Inverse variance weighted	10	-0.0161553	0.0173609	0.352082	-0.0501827	0.017872	0.983974	0.951056	1.01803
ebi-a-GCST90001859	gen_samplesize_1finngen_R9_O15_PRE_OR_ECLAMPSIA	outcome	|| id:ebi-a-GCST90001859	MR Egger	10	-0.0042443	0.024192	0.865091	-0.0516605	0.0431719	0.995765	0.949651	1.04412
ebi-a-GCST90001859	gen_samplesize_1finngen_R9_O15_PRE_OR_ECLAMPSIA	outcome	|| id:ebi-a-GCST90001859	Weighted median	10	-0.00952077	0.024308	0.695301	-0.0571645	0.0381229	0.990524	0.944439	1.03886
ebi-a-GCST90001859	gen_samplesize_1finngen_R9_O15_PRE_OR_ECLAMPSIA	outcome	|| id:ebi-a-GCST90001859	Weighted mode	10	-0.00291876	0.0252008	0.910338	-0.0523124	0.0464749	0.997085	0.949032	1.04757
ebi-a-GCST90001860	gen_samplesize_1finngen_R9_O15_PRE_OR_ECLAMPSIA	outcome	|| id:ebi-a-GCST90001860	Inverse variance weighted	13	-0.012466	0.0207488	0.54797	-0.0531335	0.0282016	0.987611	0.948253	1.0286
ebi-a-GCST90001860	gen_samplesize_1finngen_R9_O15_PRE_OR_ECLAMPSIA	outcome	|| id:ebi-a-GCST90001860	MR Egger	13	-0.04784	0.0335958	0.182194	-0.113688	0.0180078	0.953286	0.892536	1.01817
ebi-a-GCST90001860	gen_samplesize_1finngen_R9_O15_PRE_OR_ECLAMPSIA	outcome	|| id:ebi-a-GCST90001860	Weighted median	13	-0.00827487	0.0263633	0.753614	-0.059947	0.0433972	0.991759	0.941814	1.04435
ebi-a-GCST90001860	gen_samplesize_1finngen_R9_O15_PRE_OR_ECLAMPSIA	outcome	|| id:ebi-a-GCST90001860	Weighted mode	13	-0.0257499	0.0247339	0.318361	-0.0742282	0.0227285	0.974579	0.92846	1.02299
ebi-a-GCST90001861	gen_samplesize_1finngen_R9_O15_PRE_OR_ECLAMPSIA	outcome	|| id:ebi-a-GCST90001861	Inverse variance weighted	16	-0.0310572	0.0231505	0.179747	-0.0764322	0.0143178	0.96942	0.926416	1.01442
ebi-a-GCST90001861	gen_samplesize_1finngen_R9_O15_PRE_OR_ECLAMPSIA	outcome	|| id:ebi-a-GCST90001861	MR Egger	16	-0.0759882	0.0450846	0.11405	-0.164354	0.0123776	0.926827	0.848442	1.01245
ebi-a-GCST90001861	gen_samplesize_1finngen_R9_O15_PRE_OR_ECLAMPSIA	outcome	|| id:ebi-a-GCST90001861	Weighted median	16	-0.0533086	0.0309305	0.0847987	-0.113932	0.00731514	0.948087	0.892318	1.00734
ebi-a-GCST90001861	gen_samplesize_1finngen_R9_O15_PRE_OR_ECLAMPSIA	outcome	|| id:ebi-a-GCST90001861	Weighted mode	16	-0.0532217	0.0304093	0.100509	-0.112824	0.00638057	0.94817	0.893308	1.0064
ebi-a-GCST90001862	gen_samplesize_1finngen_R9_O15_PRE_OR_ECLAMPSIA	outcome	|| id:ebi-a-GCST90001862	Inverse variance weighted	7	0.0247352	0.0424251	0.559872	-0.0584181	0.107888	1.02504	0.943256	1.11392
ebi-a-GCST90001862	gen_samplesize_1finngen_R9_O15_PRE_OR_ECLAMPSIA	outcome	|| id:ebi-a-GCST90001862	MR Egger	7	0.105157	0.057717	0.128089	-0.00796826	0.218283	1.11089	0.992063	1.24394
ebi-a-GCST90001862	gen_samplesize_1finngen_R9_O15_PRE_OR_ECLAMPSIA	outcome	|| id:ebi-a-GCST90001862	Weighted median	7	0.0553028	0.0541831	0.307414	-0.0508962	0.161502	1.05686	0.950377	1.17527
ebi-a-GCST90001862	gen_samplesize_1finngen_R9_O15_PRE_OR_ECLAMPSIA	outcome	|| id:ebi-a-GCST90001862	Weighted mode	7	0.0662221	0.0621125	0.32736	-0.0555185	0.187963	1.06846	0.945995	1.20679
ebi-a-GCST90001863	gen_samplesize_1finngen_R9_O15_PRE_OR_ECLAMPSIA	outcome	|| id:ebi-a-GCST90001863	Inverse variance weighted	12	-0.0197738	0.0267368	0.45956	-0.0721779	0.0326303	0.98042	0.930365	1.03317
ebi-a-GCST90001863	gen_samplesize_1finngen_R9_O15_PRE_OR_ECLAMPSIA	outcome	|| id:ebi-a-GCST90001863	MR Egger	12	-0.00962174	0.0690597	0.891959	-0.144979	0.125735	0.990424	0.865041	1.13398
ebi-a-GCST90001863	gen_samplesize_1finngen_R9_O15_PRE_OR_ECLAMPSIA	outcome	|| id:ebi-a-GCST90001863	Weighted median	12	0.00568601	0.0364001	0.875869	-0.0656582	0.0770302	1.0057	0.936451	1.08007
ebi-a-GCST90001863	gen_samplesize_1finngen_R9_O15_PRE_OR_ECLAMPSIA	outcome	|| id:ebi-a-GCST90001863	Weighted mode	12	0.0323584	0.0607913	0.605112	-0.0867925	0.151509	1.03289	0.916867	1.16359
ebi-a-GCST90001864	gen_samplesize_1finngen_R9_O15_PRE_OR_ECLAMPSIA	outcome	|| id:ebi-a-GCST90001864	Inverse variance weighted (multiplicative random effects)	19	-0.0168121	0.0242518	0.488165	-0.0643455	0.0307214	0.983328	0.937681	1.0312
ebi-a-GCST90001864	gen_samplesize_1finngen_R9_O15_PRE_OR_ECLAMPSIA	outcome	|| id:ebi-a-GCST90001864	MR Egger	19	-0.0912466	0.045817	0.0627383	-0.181048	-0.00144533	0.912793	0.834395	0.998556
ebi-a-GCST90001864	gen_samplesize_1finngen_R9_O15_PRE_OR_ECLAMPSIA	outcome	|| id:ebi-a-GCST90001864	Weighted median	19	-0.0339669	0.0264463	0.199012	-0.0858017	0.0178679	0.966603	0.917776	1.01803
ebi-a-GCST90001864	gen_samplesize_1finngen_R9_O15_PRE_OR_ECLAMPSIA	outcome	|| id:ebi-a-GCST90001864	Weighted mode	19	-0.0403832	0.0248445	0.12145	-0.0890784	0.00831207	0.960421	0.914774	1.00835
ebi-a-GCST90001865	gen_samplesize_1finngen_R9_O15_PRE_OR_ECLAMPSIA	outcome	|| id:ebi-a-GCST90001865	Inverse variance weighted	11	-0.0836356	0.0313174	0.00757202	-0.145018	-0.0222535	0.919766	0.865007	0.977992
ebi-a-GCST90001865	gen_samplesize_1finngen_R9_O15_PRE_OR_ECLAMPSIA	outcome	|| id:ebi-a-GCST90001865	MR Egger	11	-0.0437751	0.0855827	0.621317	-0.211517	0.123967	0.957169	0.809355	1.13198
ebi-a-GCST90001865	gen_samplesize_1finngen_R9_O15_PRE_OR_ECLAMPSIA	outcome	|| id:ebi-a-GCST90001865	Weighted median	11	-0.0708395	0.0427865	0.0977926	-0.154701	0.013022	0.931611	0.856671	1.01311
ebi-a-GCST90001865	gen_samplesize_1finngen_R9_O15_PRE_OR_ECLAMPSIA	outcome	|| id:ebi-a-GCST90001865	Weighted mode	11	-0.0624548	0.064032	0.352381	-0.187958	0.0630479	0.939455	0.82865	1.06508
ebi-a-GCST90001866	gen_samplesize_1finngen_R9_O15_PRE_OR_ECLAMPSIA	outcome	|| id:ebi-a-GCST90001866	Inverse variance weighted	11	-0.0162104	0.0292741	0.579753	-0.0735875	0.0411668	0.98392	0.929055	1.04203
ebi-a-GCST90001866	gen_samplesize_1finngen_R9_O15_PRE_OR_ECLAMPSIA	outcome	|| id:ebi-a-GCST90001866	MR Egger	11	0.0428952	0.0669325	0.53758	-0.0882924	0.174083	1.04383	0.915493	1.19015
ebi-a-GCST90001866	gen_samplesize_1finngen_R9_O15_PRE_OR_ECLAMPSIA	outcome	|| id:ebi-a-GCST90001866	Weighted median	11	-0.0325133	0.042864	0.448138	-0.116527	0.0515001	0.96801	0.890006	1.05285
ebi-a-GCST90001866	gen_samplesize_1finngen_R9_O15_PRE_OR_ECLAMPSIA	outcome	|| id:ebi-a-GCST90001866	Weighted mode	11	-0.087046	0.0716703	0.252445	-0.22752	0.0534278	0.916635	0.796507	1.05488
ebi-a-GCST90001867	gen_samplesize_1finngen_R9_O15_PRE_OR_ECLAMPSIA	outcome	|| id:ebi-a-GCST90001867	Inverse variance weighted	13	0.0131678	0.0334478	0.693815	-0.0523898	0.0787255	1.01325	0.948959	1.08191
ebi-a-GCST90001867	gen_samplesize_1finngen_R9_O15_PRE_OR_ECLAMPSIA	outcome	|| id:ebi-a-GCST90001867	MR Egger	13	-0.0391099	0.0710181	0.592845	-0.178305	0.100085	0.961645	0.836687	1.10527
ebi-a-GCST90001867	gen_samplesize_1finngen_R9_O15_PRE_OR_ECLAMPSIA	outcome	|| id:ebi-a-GCST90001867	Weighted median	13	-0.00784774	0.0423858	0.853111	-0.090924	0.0752285	0.992183	0.913087	1.07813
ebi-a-GCST90001867	gen_samplesize_1finngen_R9_O15_PRE_OR_ECLAMPSIA	outcome	|| id:ebi-a-GCST90001867	Weighted mode	13	-0.00516655	0.0452698	0.911023	-0.0938953	0.0835622	0.994847	0.910378	1.08715
ebi-a-GCST90001868	gen_samplesize_1finngen_R9_O15_PRE_OR_ECLAMPSIA	outcome	|| id:ebi-a-GCST90001868	Inverse variance weighted	7	-0.0467647	0.0243294	0.0545874	-0.0944503	0.000920969	0.954312	0.909873	1.00092
ebi-a-GCST90001868	gen_samplesize_1finngen_R9_O15_PRE_OR_ECLAMPSIA	outcome	|| id:ebi-a-GCST90001868	MR Egger	7	-0.101993	0.0486767	0.090289	-0.197399	-0.00658649	0.903036	0.820863	0.993435
ebi-a-GCST90001868	gen_samplesize_1finngen_R9_O15_PRE_OR_ECLAMPSIA	outcome	|| id:ebi-a-GCST90001868	Weighted median	7	-0.0565906	0.0279607	0.0429772	-0.111394	-0.00178758	0.944981	0.894587	0.998214
ebi-a-GCST90001868	gen_samplesize_1finngen_R9_O15_PRE_OR_ECLAMPSIA	outcome	|| id:ebi-a-GCST90001868	Weighted mode	7	-0.0648471	0.0296736	0.0715323	-0.123007	-0.00668681	0.937211	0.884257	0.993335
ebi-a-GCST90001869	gen_samplesize_1finngen_R9_O15_PRE_OR_ECLAMPSIA	outcome	|| id:ebi-a-GCST90001869	Inverse variance weighted	27	0.00392883	0.0203203	0.846688	-0.0358989	0.0437565	1.00394	0.964738	1.04473
ebi-a-GCST90001869	gen_samplesize_1finngen_R9_O15_PRE_OR_ECLAMPSIA	outcome	|| id:ebi-a-GCST90001869	MR Egger	27	-0.0415558	0.0312046	0.194967	-0.102717	0.0196052	0.959296	0.902382	1.0198
ebi-a-GCST90001869	gen_samplesize_1finngen_R9_O15_PRE_OR_ECLAMPSIA	outcome	|| id:ebi-a-GCST90001869	Weighted median	27	0.00614938	0.0310531	0.843023	-0.0547147	0.0670135	1.00617	0.946755	1.06931
ebi-a-GCST90001869	gen_samplesize_1finngen_R9_O15_PRE_OR_ECLAMPSIA	outcome	|| id:ebi-a-GCST90001869	Weighted mode	27	0.00489848	0.0344356	0.887979	-0.0625952	0.0723922	1.00491	0.939324	1.07508
ebi-a-GCST90001870	gen_samplesize_1finngen_R9_O15_PRE_OR_ECLAMPSIA	outcome	|| id:ebi-a-GCST90001870	Inverse variance weighted	9	0.0136406	0.0240473	0.57055	-0.033492	0.0607733	1.01373	0.967063	1.06266
ebi-a-GCST90001870	gen_samplesize_1finngen_R9_O15_PRE_OR_ECLAMPSIA	outcome	|| id:ebi-a-GCST90001870	MR Egger	9	-0.0204293	0.0515708	0.703798	-0.121508	0.0806494	0.979778	0.885584	1.08399
ebi-a-GCST90001870	gen_samplesize_1finngen_R9_O15_PRE_OR_ECLAMPSIA	outcome	|| id:ebi-a-GCST90001870	Weighted median	9	0.0108154	0.0334876	0.746719	-0.0548203	0.0764511	1.01087	0.946655	1.07945
ebi-a-GCST90001870	gen_samplesize_1finngen_R9_O15_PRE_OR_ECLAMPSIA	outcome	|| id:ebi-a-GCST90001870	Weighted mode	9	0.00258757	0.0348171	0.942581	-0.065654	0.0708291	1.00259	0.936455	1.0734
ebi-a-GCST90001871	gen_samplesize_1finngen_R9_O15_PRE_OR_ECLAMPSIA	outcome	|| id:ebi-a-GCST90001871	Inverse variance weighted	12	0.0120669	0.0290344	0.677699	-0.0448406	0.0689744	1.01214	0.95615	1.07141
ebi-a-GCST90001871	gen_samplesize_1finngen_R9_O15_PRE_OR_ECLAMPSIA	outcome	|| id:ebi-a-GCST90001871	MR Egger	12	-0.0597183	0.0589397	0.334847	-0.17524	0.0558034	0.94203	0.839256	1.05739
ebi-a-GCST90001871	gen_samplesize_1finngen_R9_O15_PRE_OR_ECLAMPSIA	outcome	|| id:ebi-a-GCST90001871	Weighted median	12	0.0294338	0.0351924	0.402948	-0.0395433	0.0984109	1.02987	0.961228	1.10342
ebi-a-GCST90001871	gen_samplesize_1finngen_R9_O15_PRE_OR_ECLAMPSIA	outcome	|| id:ebi-a-GCST90001871	Weighted mode	12	0.0165907	0.0474026	0.732952	-0.0763184	0.1095	1.01673	0.926521	1.11572
ebi-a-GCST90001872	gen_samplesize_1finngen_R9_O15_PRE_OR_ECLAMPSIA	outcome	|| id:ebi-a-GCST90001872	Inverse variance weighted	14	-0.000312643	0.0197733	0.987385	-0.0390682	0.0384429	0.999687	0.961685	1.03919
ebi-a-GCST90001872	gen_samplesize_1finngen_R9_O15_PRE_OR_ECLAMPSIA	outcome	|| id:ebi-a-GCST90001872	MR Egger	14	-0.0356517	0.0267277	0.207004	-0.0880379	0.0167345	0.964976	0.915726	1.01688
ebi-a-GCST90001872	gen_samplesize_1finngen_R9_O15_PRE_OR_ECLAMPSIA	outcome	|| id:ebi-a-GCST90001872	Weighted median	14	-0.00589717	0.02795	0.832895	-0.0606792	0.0488849	0.99412	0.941125	1.0501
ebi-a-GCST90001872	gen_samplesize_1finngen_R9_O15_PRE_OR_ECLAMPSIA	outcome	|| id:ebi-a-GCST90001872	Weighted mode	14	-0.0126231	0.0248446	0.619907	-0.0613184	0.0360723	0.987456	0.940524	1.03673
ebi-a-GCST90001873	gen_samplesize_1finngen_R9_O15_PRE_OR_ECLAMPSIA	outcome	|| id:ebi-a-GCST90001873	Inverse variance weighted	7	0.0668218	0.0276307	0.0155895	0.0126656	0.120978	1.0691	1.01275	1.1286
ebi-a-GCST90001873	gen_samplesize_1finngen_R9_O15_PRE_OR_ECLAMPSIA	outcome	|| id:ebi-a-GCST90001873	MR Egger	7	-0.0271855	0.0992653	0.79514	-0.221745	0.167374	0.973181	0.801119	1.1822
ebi-a-GCST90001873	gen_samplesize_1finngen_R9_O15_PRE_OR_ECLAMPSIA	outcome	|| id:ebi-a-GCST90001873	Weighted median	7	0.0614659	0.0373407	0.0997467	-0.0117219	0.134654	1.06339	0.988347	1.14414
ebi-a-GCST90001873	gen_samplesize_1finngen_R9_O15_PRE_OR_ECLAMPSIA	outcome	|| id:ebi-a-GCST90001873	Weighted mode	7	0.0641524	0.0434884	0.190618	-0.0210849	0.14939	1.06625	0.979136	1.16113
ebi-a-GCST90001874	gen_samplesize_1finngen_R9_O15_PRE_OR_ECLAMPSIA	outcome	|| id:ebi-a-GCST90001874	Inverse variance weighted	12	-0.00948169	0.0213363	0.656759	-0.0513008	0.0323374	0.990563	0.949993	1.03287
ebi-a-GCST90001874	gen_samplesize_1finngen_R9_O15_PRE_OR_ECLAMPSIA	outcome	|| id:ebi-a-GCST90001874	MR Egger	12	0.021444	0.0421837	0.622234	-0.061236	0.104124	1.02168	0.940601	1.10974
ebi-a-GCST90001874	gen_samplesize_1finngen_R9_O15_PRE_OR_ECLAMPSIA	outcome	|| id:ebi-a-GCST90001874	Weighted median	12	-0.00636636	0.029638	0.82992	-0.0644569	0.0517242	0.993654	0.937577	1.05309
ebi-a-GCST90001874	gen_samplesize_1finngen_R9_O15_PRE_OR_ECLAMPSIA	outcome	|| id:ebi-a-GCST90001874	Weighted mode	12	-0.01121	0.0411167	0.790182	-0.0917988	0.0693788	0.988853	0.912289	1.07184
ebi-a-GCST90001875	gen_samplesize_1finngen_R9_O15_PRE_OR_ECLAMPSIA	outcome	|| id:ebi-a-GCST90001875	Inverse variance weighted (multiplicative random effects)	11	-0.0255076	0.0407501	0.531347	-0.105378	0.0543626	0.974815	0.899984	1.05587
ebi-a-GCST90001875	gen_samplesize_1finngen_R9_O15_PRE_OR_ECLAMPSIA	outcome	|| id:ebi-a-GCST90001875	MR Egger	11	0.0669397	0.119386	0.588687	-0.167057	0.300937	1.06923	0.846151	1.35112
ebi-a-GCST90001875	gen_samplesize_1finngen_R9_O15_PRE_OR_ECLAMPSIA	outcome	|| id:ebi-a-GCST90001875	Weighted median	11	0.0298725	0.0421396	0.47839	-0.052721	0.112466	1.03032	0.948645	1.11903
ebi-a-GCST90001875	gen_samplesize_1finngen_R9_O15_PRE_OR_ECLAMPSIA	outcome	|| id:ebi-a-GCST90001875	Weighted mode	11	0.0450603	0.0522574	0.408738	-0.0573642	0.147485	1.04609	0.94425	1.15892
ebi-a-GCST90001876	gen_samplesize_1finngen_R9_O15_PRE_OR_ECLAMPSIA	outcome	|| id:ebi-a-GCST90001876	Inverse variance weighted	6	-0.0180758	0.0264855	0.494935	-0.0699874	0.0338357	0.982087	0.932406	1.03441
ebi-a-GCST90001876	gen_samplesize_1finngen_R9_O15_PRE_OR_ECLAMPSIA	outcome	|| id:ebi-a-GCST90001876	MR Egger	6	-0.0533833	0.0320318	0.170928	-0.116166	0.00939907	0.948017	0.890328	1.00944
ebi-a-GCST90001876	gen_samplesize_1finngen_R9_O15_PRE_OR_ECLAMPSIA	outcome	|| id:ebi-a-GCST90001876	Weighted median	6	-0.0209715	0.0283486	0.459439	-0.0765348	0.0345918	0.979247	0.926321	1.0352
ebi-a-GCST90001876	gen_samplesize_1finngen_R9_O15_PRE_OR_ECLAMPSIA	outcome	|| id:ebi-a-GCST90001876	Weighted mode	6	-0.0347339	0.0307828	0.310384	-0.0950682	0.0256005	0.965862	0.909311	1.02593
ebi-a-GCST90001877	gen_samplesize_1finngen_R9_O15_PRE_OR_ECLAMPSIA	outcome	|| id:ebi-a-GCST90001877	Inverse variance weighted	8	-0.0211887	0.0334667	0.526651	-0.0867834	0.0444061	0.979034	0.916876	1.04541
ebi-a-GCST90001877	gen_samplesize_1finngen_R9_O15_PRE_OR_ECLAMPSIA	outcome	|| id:ebi-a-GCST90001877	MR Egger	8	-0.0386608	0.0696323	0.598822	-0.17514	0.0978184	0.962077	0.839339	1.10276
ebi-a-GCST90001877	gen_samplesize_1finngen_R9_O15_PRE_OR_ECLAMPSIA	outcome	|| id:ebi-a-GCST90001877	Weighted median	8	-0.0246132	0.0352411	0.484913	-0.0936858	0.0444594	0.975687	0.910569	1.04546
ebi-a-GCST90001877	gen_samplesize_1finngen_R9_O15_PRE_OR_ECLAMPSIA	outcome	|| id:ebi-a-GCST90001877	Weighted mode	8	-0.0345617	0.0416234	0.433747	-0.116144	0.0470202	0.966029	0.890347	1.04814
ebi-a-GCST90001878	gen_samplesize_1finngen_R9_O15_PRE_OR_ECLAMPSIA	outcome	|| id:ebi-a-GCST90001878	Inverse variance weighted (multiplicative random effects)	10	0.0304352	0.0400922	0.447774	-0.0481455	0.109016	1.0309	0.952995	1.11518
ebi-a-GCST90001878	gen_samplesize_1finngen_R9_O15_PRE_OR_ECLAMPSIA	outcome	|| id:ebi-a-GCST90001878	MR Egger	10	-0.215085	0.104801	0.0742389	-0.420494	-0.00967642	0.806473	0.656722	0.99037
ebi-a-GCST90001878	gen_samplesize_1finngen_R9_O15_PRE_OR_ECLAMPSIA	outcome	|| id:ebi-a-GCST90001878	Weighted median	10	-0.00173168	0.0397953	0.965291	-0.0797306	0.0762672	0.99827	0.923365	1.07925
ebi-a-GCST90001878	gen_samplesize_1finngen_R9_O15_PRE_OR_ECLAMPSIA	outcome	|| id:ebi-a-GCST90001878	Weighted mode	10	-0.0174007	0.0545199	0.756887	-0.12426	0.0894582	0.98275	0.883151	1.09358
ebi-a-GCST90001879	gen_samplesize_1finngen_R9_O15_PRE_OR_ECLAMPSIA	outcome	|| id:ebi-a-GCST90001879	Inverse variance weighted	10	0.0355059	0.027025	0.188908	-0.0174631	0.0884749	1.03614	0.982688	1.09251
ebi-a-GCST90001879	gen_samplesize_1finngen_R9_O15_PRE_OR_ECLAMPSIA	outcome	|| id:ebi-a-GCST90001879	MR Egger	10	-0.0585337	0.183634	0.758078	-0.418457	0.30139	0.943146	0.658061	1.35174
ebi-a-GCST90001879	gen_samplesize_1finngen_R9_O15_PRE_OR_ECLAMPSIA	outcome	|| id:ebi-a-GCST90001879	Weighted median	10	0.042599	0.0339176	0.209132	-0.0238795	0.109078	1.04352	0.976403	1.11525
ebi-a-GCST90001879	gen_samplesize_1finngen_R9_O15_PRE_OR_ECLAMPSIA	outcome	|| id:ebi-a-GCST90001879	Weighted mode	10	0.0470855	0.0521441	0.390061	-0.055117	0.149288	1.04821	0.946374	1.16101
ebi-a-GCST90001880	gen_samplesize_1finngen_R9_O15_PRE_OR_ECLAMPSIA	outcome	|| id:ebi-a-GCST90001880	Inverse variance weighted (multiplicative random effects)	12	0.0116546	0.0274496	0.67114	-0.0421465	0.0654558	1.01172	0.958729	1.06765
ebi-a-GCST90001880	gen_samplesize_1finngen_R9_O15_PRE_OR_ECLAMPSIA	outcome	|| id:ebi-a-GCST90001880	MR Egger	12	0.0192352	0.0557843	0.737376	-0.0901021	0.128573	1.01942	0.913838	1.1372
ebi-a-GCST90001880	gen_samplesize_1finngen_R9_O15_PRE_OR_ECLAMPSIA	outcome	|| id:ebi-a-GCST90001880	Weighted median	12	0.0442868	0.0301414	0.141751	-0.0147903	0.103364	1.04528	0.985319	1.10889
ebi-a-GCST90001880	gen_samplesize_1finngen_R9_O15_PRE_OR_ECLAMPSIA	outcome	|| id:ebi-a-GCST90001880	Weighted mode	12	0.0523508	0.0295057	0.103666	-0.00548039	0.110182	1.05375	0.994535	1.11648
ebi-a-GCST90001881	gen_samplesize_1finngen_R9_O15_PRE_OR_ECLAMPSIA	outcome	|| id:ebi-a-GCST90001881	Inverse variance weighted	7	-0.0193725	0.0374447	0.604903	-0.0927642	0.0540192	0.980814	0.911408	1.0555
ebi-a-GCST90001881	gen_samplesize_1finngen_R9_O15_PRE_OR_ECLAMPSIA	outcome	|| id:ebi-a-GCST90001881	MR Egger	7	-0.0784182	0.129598	0.571529	-0.33243	0.175593	0.924578	0.717179	1.19195
ebi-a-GCST90001881	gen_samplesize_1finngen_R9_O15_PRE_OR_ECLAMPSIA	outcome	|| id:ebi-a-GCST90001881	Weighted median	7	0.00235274	0.0427595	0.95612	-0.0814559	0.0861614	1.00236	0.921773	1.08998
ebi-a-GCST90001881	gen_samplesize_1finngen_R9_O15_PRE_OR_ECLAMPSIA	outcome	|| id:ebi-a-GCST90001881	Weighted mode	7	0.0160138	0.0562695	0.785524	-0.0942744	0.126302	1.01614	0.910033	1.13462
ebi-a-GCST90001882	gen_samplesize_1finngen_R9_O15_PRE_OR_ECLAMPSIA	outcome	|| id:ebi-a-GCST90001882	Inverse variance weighted (multiplicative random effects)	10	-0.015644	0.0425542	0.713153	-0.0990503	0.0677623	0.984478	0.905697	1.07011
ebi-a-GCST90001882	gen_samplesize_1finngen_R9_O15_PRE_OR_ECLAMPSIA	outcome	|| id:ebi-a-GCST90001882	MR Egger	10	-0.0714051	0.218647	0.752368	-0.499953	0.357143	0.931085	0.606559	1.42924
ebi-a-GCST90001882	gen_samplesize_1finngen_R9_O15_PRE_OR_ECLAMPSIA	outcome	|| id:ebi-a-GCST90001882	Weighted median	10	-0.0170398	0.0383794	0.657055	-0.0922633	0.0581838	0.983105	0.911865	1.05991
ebi-a-GCST90001882	gen_samplesize_1finngen_R9_O15_PRE_OR_ECLAMPSIA	outcome	|| id:ebi-a-GCST90001882	Weighted mode	10	-0.013149	0.056694	0.821781	-0.124269	0.0979713	0.986937	0.883142	1.10293
ebi-a-GCST90001883	gen_samplesize_1finngen_R9_O15_PRE_OR_ECLAMPSIA	outcome	|| id:ebi-a-GCST90001883	Inverse variance weighted	18	0.00690213	0.020808	0.740112	-0.0338816	0.0476858	1.00693	0.966686	1.04884
ebi-a-GCST90001883	gen_samplesize_1finngen_R9_O15_PRE_OR_ECLAMPSIA	outcome	|| id:ebi-a-GCST90001883	MR Egger	18	-0.00797483	0.0356974	0.826051	-0.0779417	0.061992	0.992057	0.925018	1.06395
ebi-a-GCST90001883	gen_samplesize_1finngen_R9_O15_PRE_OR_ECLAMPSIA	outcome	|| id:ebi-a-GCST90001883	Weighted median	18	0.00504021	0.0284506	0.859385	-0.0507229	0.0608033	1.00505	0.950542	1.06269
ebi-a-GCST90001883	gen_samplesize_1finngen_R9_O15_PRE_OR_ECLAMPSIA	outcome	|| id:ebi-a-GCST90001883	Weighted mode	18	0.00304472	0.0301087	0.920635	-0.0559684	0.0620578	1.00305	0.945569	1.06402
ebi-a-GCST90001884	gen_samplesize_1finngen_R9_O15_PRE_OR_ECLAMPSIA	outcome	|| id:ebi-a-GCST90001884	Inverse variance weighted (multiplicative random effects)	19	0.0257096	0.0269531	0.340153	-0.0271185	0.0785376	1.02604	0.973246	1.0817
ebi-a-GCST90001884	gen_samplesize_1finngen_R9_O15_PRE_OR_ECLAMPSIA	outcome	|| id:ebi-a-GCST90001884	MR Egger	19	0.112945	0.0531968	0.048722	0.00867933	0.217211	1.11957	1.00872	1.24261
ebi-a-GCST90001884	gen_samplesize_1finngen_R9_O15_PRE_OR_ECLAMPSIA	outcome	|| id:ebi-a-GCST90001884	Weighted median	19	0.0449182	0.0294959	0.127793	-0.0128938	0.10273	1.04594	0.987189	1.10819
ebi-a-GCST90001884	gen_samplesize_1finngen_R9_O15_PRE_OR_ECLAMPSIA	outcome	|| id:ebi-a-GCST90001884	Weighted mode	19	0.0565923	0.0314296	0.088546	-0.0050098	0.118194	1.05822	0.995003	1.12546
ebi-a-GCST90001885	gen_samplesize_1finngen_R9_O15_PRE_OR_ECLAMPSIA	outcome	|| id:ebi-a-GCST90001885	Inverse variance weighted	14	-0.00391692	0.0183348	0.830833	-0.0398531	0.0320193	0.996091	0.960931	1.03254
ebi-a-GCST90001885	gen_samplesize_1finngen_R9_O15_PRE_OR_ECLAMPSIA	outcome	|| id:ebi-a-GCST90001885	MR Egger	14	-0.00539718	0.0248935	0.831998	-0.0541884	0.0433941	0.994617	0.947254	1.04435
ebi-a-GCST90001885	gen_samplesize_1finngen_R9_O15_PRE_OR_ECLAMPSIA	outcome	|| id:ebi-a-GCST90001885	Weighted median	14	-0.0255258	0.0224309	0.255132	-0.0694903	0.0184388	0.974797	0.932869	1.01861
ebi-a-GCST90001885	gen_samplesize_1finngen_R9_O15_PRE_OR_ECLAMPSIA	outcome	|| id:ebi-a-GCST90001885	Weighted mode	14	-0.0156597	0.020879	0.466599	-0.0565825	0.0252631	0.984462	0.944989	1.02558
ebi-a-GCST90001886	gen_samplesize_1finngen_R9_O15_PRE_OR_ECLAMPSIA	outcome	|| id:ebi-a-GCST90001886	Inverse variance weighted (multiplicative random effects)	12	0.022005	0.0282325	0.435733	-0.0333308	0.0773407	1.02225	0.967219	1.08041
ebi-a-GCST90001886	gen_samplesize_1finngen_R9_O15_PRE_OR_ECLAMPSIA	outcome	|| id:ebi-a-GCST90001886	MR Egger	12	0.020887	0.0476343	0.670355	-0.0724763	0.11425	1.02111	0.930088	1.12103
ebi-a-GCST90001886	gen_samplesize_1finngen_R9_O15_PRE_OR_ECLAMPSIA	outcome	|| id:ebi-a-GCST90001886	Weighted median	12	0.0464696	0.0297462	0.11824	-0.0118329	0.104772	1.04757	0.988237	1.11046
ebi-a-GCST90001886	gen_samplesize_1finngen_R9_O15_PRE_OR_ECLAMPSIA	outcome	|| id:ebi-a-GCST90001886	Weighted mode	12	0.0613867	0.0390836	0.144563	-0.015217	0.137991	1.06331	0.984898	1.14796
ebi-a-GCST90001887	gen_samplesize_1finngen_R9_O15_PRE_OR_ECLAMPSIA	outcome	|| id:ebi-a-GCST90001887	Inverse variance weighted	9	0.0132257	0.0195133	0.497912	-0.0250203	0.0514717	1.01331	0.97529	1.05282
ebi-a-GCST90001887	gen_samplesize_1finngen_R9_O15_PRE_OR_ECLAMPSIA	outcome	|| id:ebi-a-GCST90001887	MR Egger	9	-0.0292697	0.0245506	0.27202	-0.0773889	0.0188495	0.971154	0.92553	1.01903
ebi-a-GCST90001887	gen_samplesize_1finngen_R9_O15_PRE_OR_ECLAMPSIA	outcome	|| id:ebi-a-GCST90001887	Weighted median	9	-0.00303021	0.0239365	0.899262	-0.0499458	0.0438854	0.996974	0.951281	1.04486
ebi-a-GCST90001887	gen_samplesize_1finngen_R9_O15_PRE_OR_ECLAMPSIA	outcome	|| id:ebi-a-GCST90001887	Weighted mode	9	-0.00290947	0.0214243	0.895332	-0.0449011	0.0390822	0.997095	0.956092	1.03986
ebi-a-GCST90001888	gen_samplesize_1finngen_R9_O15_PRE_OR_ECLAMPSIA	outcome	|| id:ebi-a-GCST90001888	Inverse variance weighted	12	0.0039887	0.0273352	0.883986	-0.0495883	0.0575657	1.004	0.951621	1.05925
ebi-a-GCST90001888	gen_samplesize_1finngen_R9_O15_PRE_OR_ECLAMPSIA	outcome	|| id:ebi-a-GCST90001888	MR Egger	12	0.0775206	0.0490345	0.144973	-0.018587	0.173628	1.0806	0.981585	1.18961
ebi-a-GCST90001888	gen_samplesize_1finngen_R9_O15_PRE_OR_ECLAMPSIA	outcome	|| id:ebi-a-GCST90001888	Weighted median	12	0.0490016	0.0355378	0.167938	-0.0206524	0.118656	1.05022	0.979559	1.12598
ebi-a-GCST90001888	gen_samplesize_1finngen_R9_O15_PRE_OR_ECLAMPSIA	outcome	|| id:ebi-a-GCST90001888	Weighted mode	12	0.0525684	0.035616	0.167993	-0.0172389	0.122376	1.05397	0.982909	1.13018
ebi-a-GCST90001889	gen_samplesize_1finngen_R9_O15_PRE_OR_ECLAMPSIA	outcome	|| id:ebi-a-GCST90001889	Inverse variance weighted	10	-0.00343388	0.024794	0.889848	-0.0520301	0.0451624	0.996572	0.9493	1.0462
ebi-a-GCST90001889	gen_samplesize_1finngen_R9_O15_PRE_OR_ECLAMPSIA	outcome	|| id:ebi-a-GCST90001889	MR Egger	10	-0.0447653	0.0361541	0.25075	-0.115627	0.0260967	0.956222	0.890807	1.02644
ebi-a-GCST90001889	gen_samplesize_1finngen_R9_O15_PRE_OR_ECLAMPSIA	outcome	|| id:ebi-a-GCST90001889	Weighted median	10	-0.0356135	0.0355991	0.317115	-0.105388	0.0341608	0.965013	0.899975	1.03475
ebi-a-GCST90001889	gen_samplesize_1finngen_R9_O15_PRE_OR_ECLAMPSIA	outcome	|| id:ebi-a-GCST90001889	Weighted mode	10	-0.042608	0.0363685	0.271453	-0.11389	0.0286743	0.958287	0.892356	1.02909
ebi-a-GCST90001890	gen_samplesize_1finngen_R9_O15_PRE_OR_ECLAMPSIA	outcome	|| id:ebi-a-GCST90001890	Inverse variance weighted (multiplicative random effects)	12	0.0499617	0.0383953	0.193174	-0.0252931	0.125216	1.05123	0.975024	1.13339
ebi-a-GCST90001890	gen_samplesize_1finngen_R9_O15_PRE_OR_ECLAMPSIA	outcome	|| id:ebi-a-GCST90001890	MR Egger	12	0.118046	0.0748047	0.145633	-0.0285716	0.264663	1.1253	0.971833	1.30299
ebi-a-GCST90001890	gen_samplesize_1finngen_R9_O15_PRE_OR_ECLAMPSIA	outcome	|| id:ebi-a-GCST90001890	Weighted median	12	0.0860582	0.0394869	0.029301	0.00866392	0.163453	1.08987	1.0087	1.17757
ebi-a-GCST90001890	gen_samplesize_1finngen_R9_O15_PRE_OR_ECLAMPSIA	outcome	|| id:ebi-a-GCST90001890	Weighted mode	12	0.0808264	0.03918	0.0635412	0.00403362	0.157619	1.08418	1.00404	1.17072
ebi-a-GCST90001891	gen_samplesize_1finngen_R9_O15_PRE_OR_ECLAMPSIA	outcome	|| id:ebi-a-GCST90001891	Inverse variance weighted	10	0.0184982	0.0291384	0.525534	-0.0386131	0.0756095	1.01867	0.962123	1.07854
ebi-a-GCST90001891	gen_samplesize_1finngen_R9_O15_PRE_OR_ECLAMPSIA	outcome	|| id:ebi-a-GCST90001891	MR Egger	10	-0.0493084	0.0589622	0.427273	-0.164874	0.0662574	0.951887	0.848	1.0685
ebi-a-GCST90001891	gen_samplesize_1finngen_R9_O15_PRE_OR_ECLAMPSIA	outcome	|| id:ebi-a-GCST90001891	Weighted median	10	0.00312126	0.0402211	0.938144	-0.0757121	0.0819546	1.00313	0.927083	1.08541
ebi-a-GCST90001891	gen_samplesize_1finngen_R9_O15_PRE_OR_ECLAMPSIA	outcome	|| id:ebi-a-GCST90001891	Weighted mode	10	-0.00526228	0.0463978	0.91219	-0.0962019	0.0856773	0.994752	0.908281	1.08945
ebi-a-GCST90001892	gen_samplesize_1finngen_R9_O15_PRE_OR_ECLAMPSIA	outcome	|| id:ebi-a-GCST90001892	Inverse variance weighted	10	0.0471498	0.0287499	0.101005	-0.00919999	0.1035	1.04828	0.990842	1.10905
ebi-a-GCST90001892	gen_samplesize_1finngen_R9_O15_PRE_OR_ECLAMPSIA	outcome	|| id:ebi-a-GCST90001892	MR Egger	10	0.102517	0.0426536	0.0429435	0.0189156	0.186118	1.10796	1.0191	1.20456
ebi-a-GCST90001892	gen_samplesize_1finngen_R9_O15_PRE_OR_ECLAMPSIA	outcome	|| id:ebi-a-GCST90001892	Weighted median	10	0.0589859	0.0269689	0.0287292	0.00612685	0.111845	1.06076	1.00615	1.11834
ebi-a-GCST90001892	gen_samplesize_1finngen_R9_O15_PRE_OR_ECLAMPSIA	outcome	|| id:ebi-a-GCST90001892	Weighted mode	10	0.061055	0.0270997	0.0507555	0.00793966	0.11417	1.06296	1.00797	1.12094
ebi-a-GCST90001893	gen_samplesize_1finngen_R9_O15_PRE_OR_ECLAMPSIA	outcome	|| id:ebi-a-GCST90001893	Inverse variance weighted (multiplicative random effects)	11	0.0437677	0.0573994	0.445755	-0.0687351	0.156271	1.04474	0.933574	1.16914
[truncated: 905 more rows]

## Sheet: Supplementary Table 2
Supplementary Table 2: Two-sample Mendelian randomization results of inflammatory factors on the risk of preeclampsia
id.exposure	id.outcome	outcome	exposure	method	nsnp	b	se	pval	lo_ci	up_ci	or	or_lci95	or_uci95
GCST90274758	gen_samplesize_1finngen_R9_O15_PRE_OR_ECLAMPSIA	outcome	Eukaryotic translation initiation factor 4E-binding protein 1 levels	Inverse variance weighted (multiplicative random effects)	11	0.110169	0.122839	0.369797	-0.130596	0.350934	1.11647	0.877572	1.42039
GCST90274758	gen_samplesize_1finngen_R9_O15_PRE_OR_ECLAMPSIA	outcome	Eukaryotic translation initiation factor 4E-binding protein 1 levels	MR Egger	11	-0.226493	0.298204	0.466967	-0.810974	0.357988	0.797325	0.444425	1.43045
GCST90274758	gen_samplesize_1finngen_R9_O15_PRE_OR_ECLAMPSIA	outcome	Eukaryotic translation initiation factor 4E-binding protein 1 levels	Weighted median	11	0.0868845	0.107446	0.418724	-0.123709	0.297478	1.09077	0.883637	1.34646
GCST90274758	gen_samplesize_1finngen_R9_O15_PRE_OR_ECLAMPSIA	outcome	Eukaryotic translation initiation factor 4E-binding protein 1 levels	Weighted mode	11	0.0736519	0.134946	0.597176	-0.190843	0.338146	1.07643	0.826263	1.40235
GCST90274759	gen_samplesize_1finngen_R9_O15_PRE_OR_ECLAMPSIA	outcome	Adenosine Deaminase levels	Inverse variance weighted	4	0.0108307	0.0417021	0.795083	-0.0709055	0.0925669	1.01089	0.93155	1.09699
GCST90274759	gen_samplesize_1finngen_R9_O15_PRE_OR_ECLAMPSIA	outcome	Adenosine Deaminase levels	MR Egger	4	-0.0340802	0.0474144	0.546912	-0.127012	0.058852	0.966494	0.880723	1.06062
GCST90274759	gen_samplesize_1finngen_R9_O15_PRE_OR_ECLAMPSIA	outcome	Adenosine Deaminase levels	Weighted median	4	-0.00182054	0.0385044	0.962289	-0.0772892	0.0736481	0.998181	0.925622	1.07643
GCST90274759	gen_samplesize_1finngen_R9_O15_PRE_OR_ECLAMPSIA	outcome	Adenosine Deaminase levels	Weighted mode	4	-0.00124745	0.0426653	0.978511	-0.0848714	0.0823765	0.998753	0.91863	1.08586
GCST90274760	gen_samplesize_1finngen_R9_O15_PRE_OR_ECLAMPSIA	outcome	Artemin levels	Inverse variance weighted	17	0.0207437	0.063709	0.744726	-0.104126	0.145613	1.02096	0.901112	1.15675
GCST90274760	gen_samplesize_1finngen_R9_O15_PRE_OR_ECLAMPSIA	outcome	Artemin levels	MR Egger	17	0.00507134	0.162636	0.975535	-0.313695	0.323838	1.00508	0.730742	1.38242
GCST90274760	gen_samplesize_1finngen_R9_O15_PRE_OR_ECLAMPSIA	outcome	Artemin levels	Weighted median	17	-0.00358696	0.0878899	0.967446	-0.175851	0.168677	0.996419	0.838743	1.18374
GCST90274760	gen_samplesize_1finngen_R9_O15_PRE_OR_ECLAMPSIA	outcome	Artemin levels	Weighted mode	17	-0.0224284	0.133119	0.868314	-0.283341	0.238484	0.977821	0.753263	1.26932
GCST90274761	gen_samplesize_1finngen_R9_O15_PRE_OR_ECLAMPSIA	outcome	Axin-1 levels	Inverse variance weighted	8	0.1004	0.0944774	0.287925	-0.0847759	0.285575	1.10561	0.918718	1.33053
GCST90274761	gen_samplesize_1finngen_R9_O15_PRE_OR_ECLAMPSIA	outcome	Axin-1 levels	MR Egger	8	-0.161421	0.227039	0.503782	-0.606416	0.283575	0.850934	0.545302	1.32787
GCST90274761	gen_samplesize_1finngen_R9_O15_PRE_OR_ECLAMPSIA	outcome	Axin-1 levels	Weighted median	8	0.122135	0.120654	0.311405	-0.114346	0.358617	1.12991	0.891949	1.43135
GCST90274761	gen_samplesize_1finngen_R9_O15_PRE_OR_ECLAMPSIA	outcome	Axin-1 levels	Weighted mode	8	0.125608	0.182376	0.513167	-0.23185	0.483065	1.13384	0.793065	1.62104
GCST90274762	gen_samplesize_1finngen_R9_O15_PRE_OR_ECLAMPSIA	outcome	beta-nerve growth factor levels	Inverse variance weighted	21	0.0171753	0.0662741	0.795516	-0.112722	0.147073	1.01732	0.893399	1.15844
GCST90274762	gen_samplesize_1finngen_R9_O15_PRE_OR_ECLAMPSIA	outcome	beta-nerve growth factor levels	MR Egger	21	-0.172982	0.172117	0.327513	-0.510332	0.164368	0.841152	0.600296	1.17865
GCST90274762	gen_samplesize_1finngen_R9_O15_PRE_OR_ECLAMPSIA	outcome	beta-nerve growth factor levels	Weighted median	21	-0.0365388	0.0966404	0.705364	-0.225954	0.152876	0.964121	0.797755	1.16518
GCST90274762	gen_samplesize_1finngen_R9_O15_PRE_OR_ECLAMPSIA	outcome	beta-nerve growth factor levels	Weighted mode	21	-0.070742	0.140708	0.620626	-0.34653	0.205046	0.931702	0.707138	1.22758
GCST90274763	gen_samplesize_1finngen_R9_O15_PRE_OR_ECLAMPSIA	outcome	Caspase 8 levels	Inverse variance weighted	14	0.0429734	0.0648642	0.507642	-0.0841603	0.170107	1.04391	0.919284	1.18543
GCST90274763	gen_samplesize_1finngen_R9_O15_PRE_OR_ECLAMPSIA	outcome	Caspase 8 levels	MR Egger	14	0.134002	0.116297	0.271661	-0.0939399	0.361944	1.14339	0.910337	1.43612
GCST90274763	gen_samplesize_1finngen_R9_O15_PRE_OR_ECLAMPSIA	outcome	Caspase 8 levels	Weighted median	14	0.0448855	0.0905953	0.620282	-0.132681	0.222452	1.04591	0.875744	1.24914
GCST90274763	gen_samplesize_1finngen_R9_O15_PRE_OR_ECLAMPSIA	outcome	Caspase 8 levels	Weighted mode	14	0.00510549	0.116298	0.965651	-0.222838	0.233049	1.00512	0.800245	1.26244
GCST90274764	gen_samplesize_1finngen_R9_O15_PRE_OR_ECLAMPSIA	outcome	Eotaxin levels	Inverse variance weighted	19	0.0286618	0.0606417	0.636469	-0.0901959	0.14752	1.02908	0.913752	1.15896
GCST90274764	gen_samplesize_1finngen_R9_O15_PRE_OR_ECLAMPSIA	outcome	Eotaxin levels	MR Egger	19	-0.0927311	0.121296	0.45505	-0.330471	0.145009	0.911439	0.718585	1.15605
[truncated: 338 more rows]

## Sheet: Supplementary Table 3
Supplementary Table 3: Two-sample Mendelian randomization results of gut microbiota on the risk of preeclampsia
[truncated: 1,610 more rows]

[truncated: 3 more sheets: Supplementary Table 4, Supplementary Table 5, Supplementary Table 6]
